# Supplementary material for: Light Quality and Intensity Modulate Cold Acclimation in Arabidopsis
Source: MDPI journal article supplement (doi:10.3390/ijms22052736), 2021-03-08
Supplement: s1 [file s1]

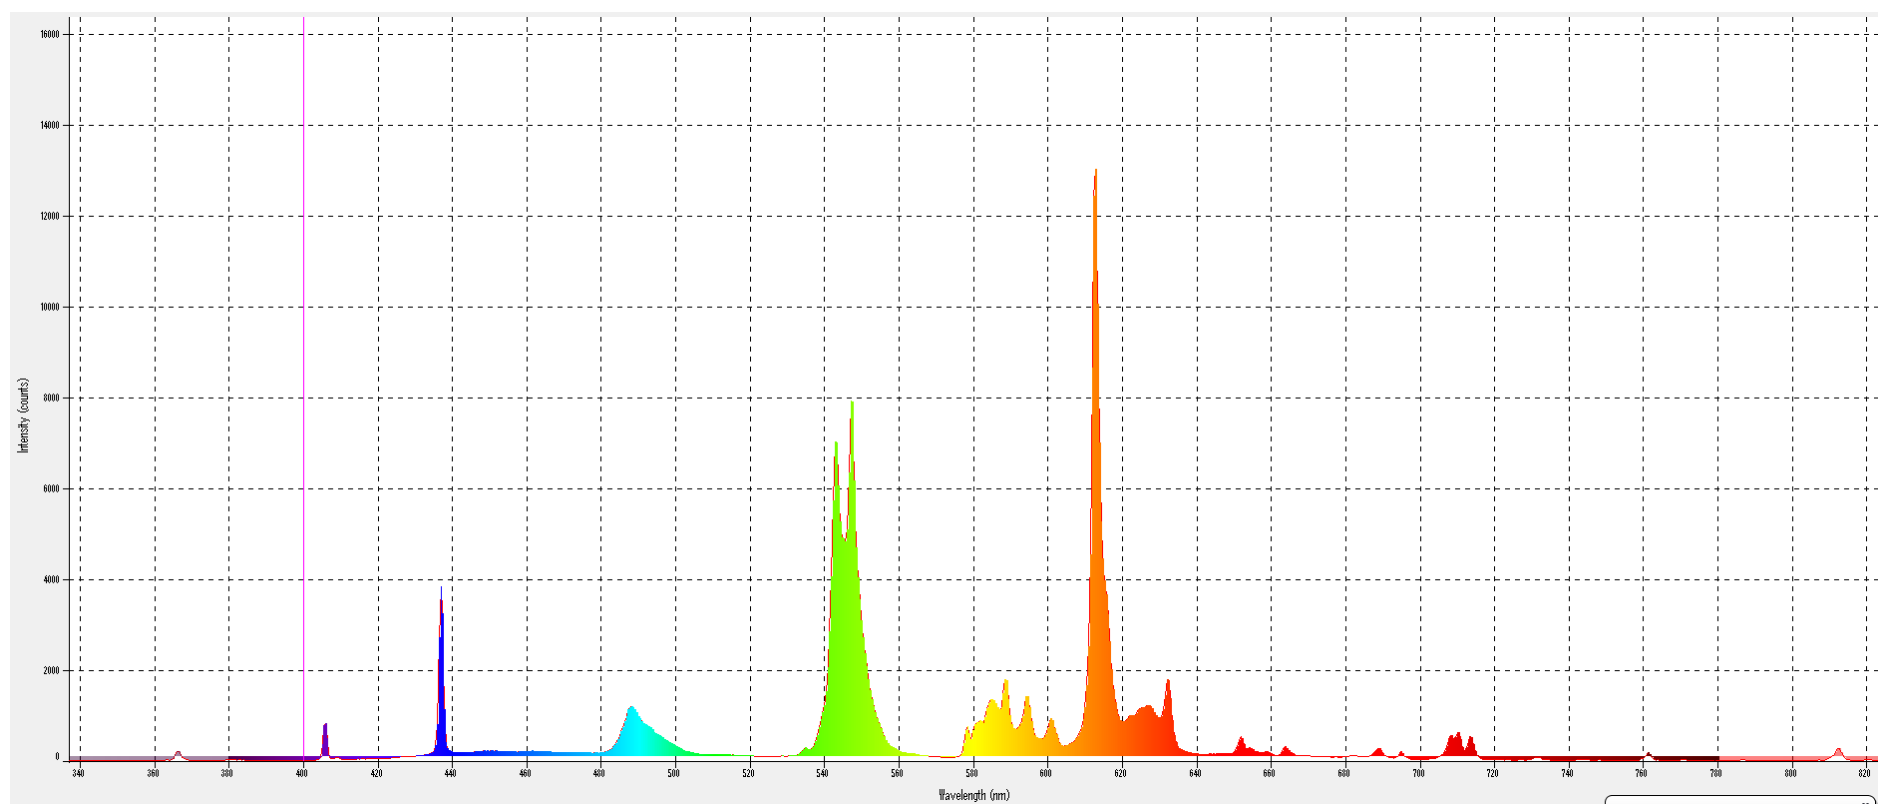

**Figure S2:** Spectrum of lights in a climate chamber Percival AR41-L2 (Percival Scientific) used in the experiment. The spectrum was measured by Spectroscopy education Kit (EDU-STIS-VIS-PACK; Ocean Insight). Intensity of individual wavelengths is in relative units.
