# Supplementary material for: Light Quality and Intensity Modulate Cold Acclimation in Arabidopsis
Source: MDPI journal article supplement (doi:10.3390/ijms22052736), 2021-03-08
Supplement: s1 [file s1]

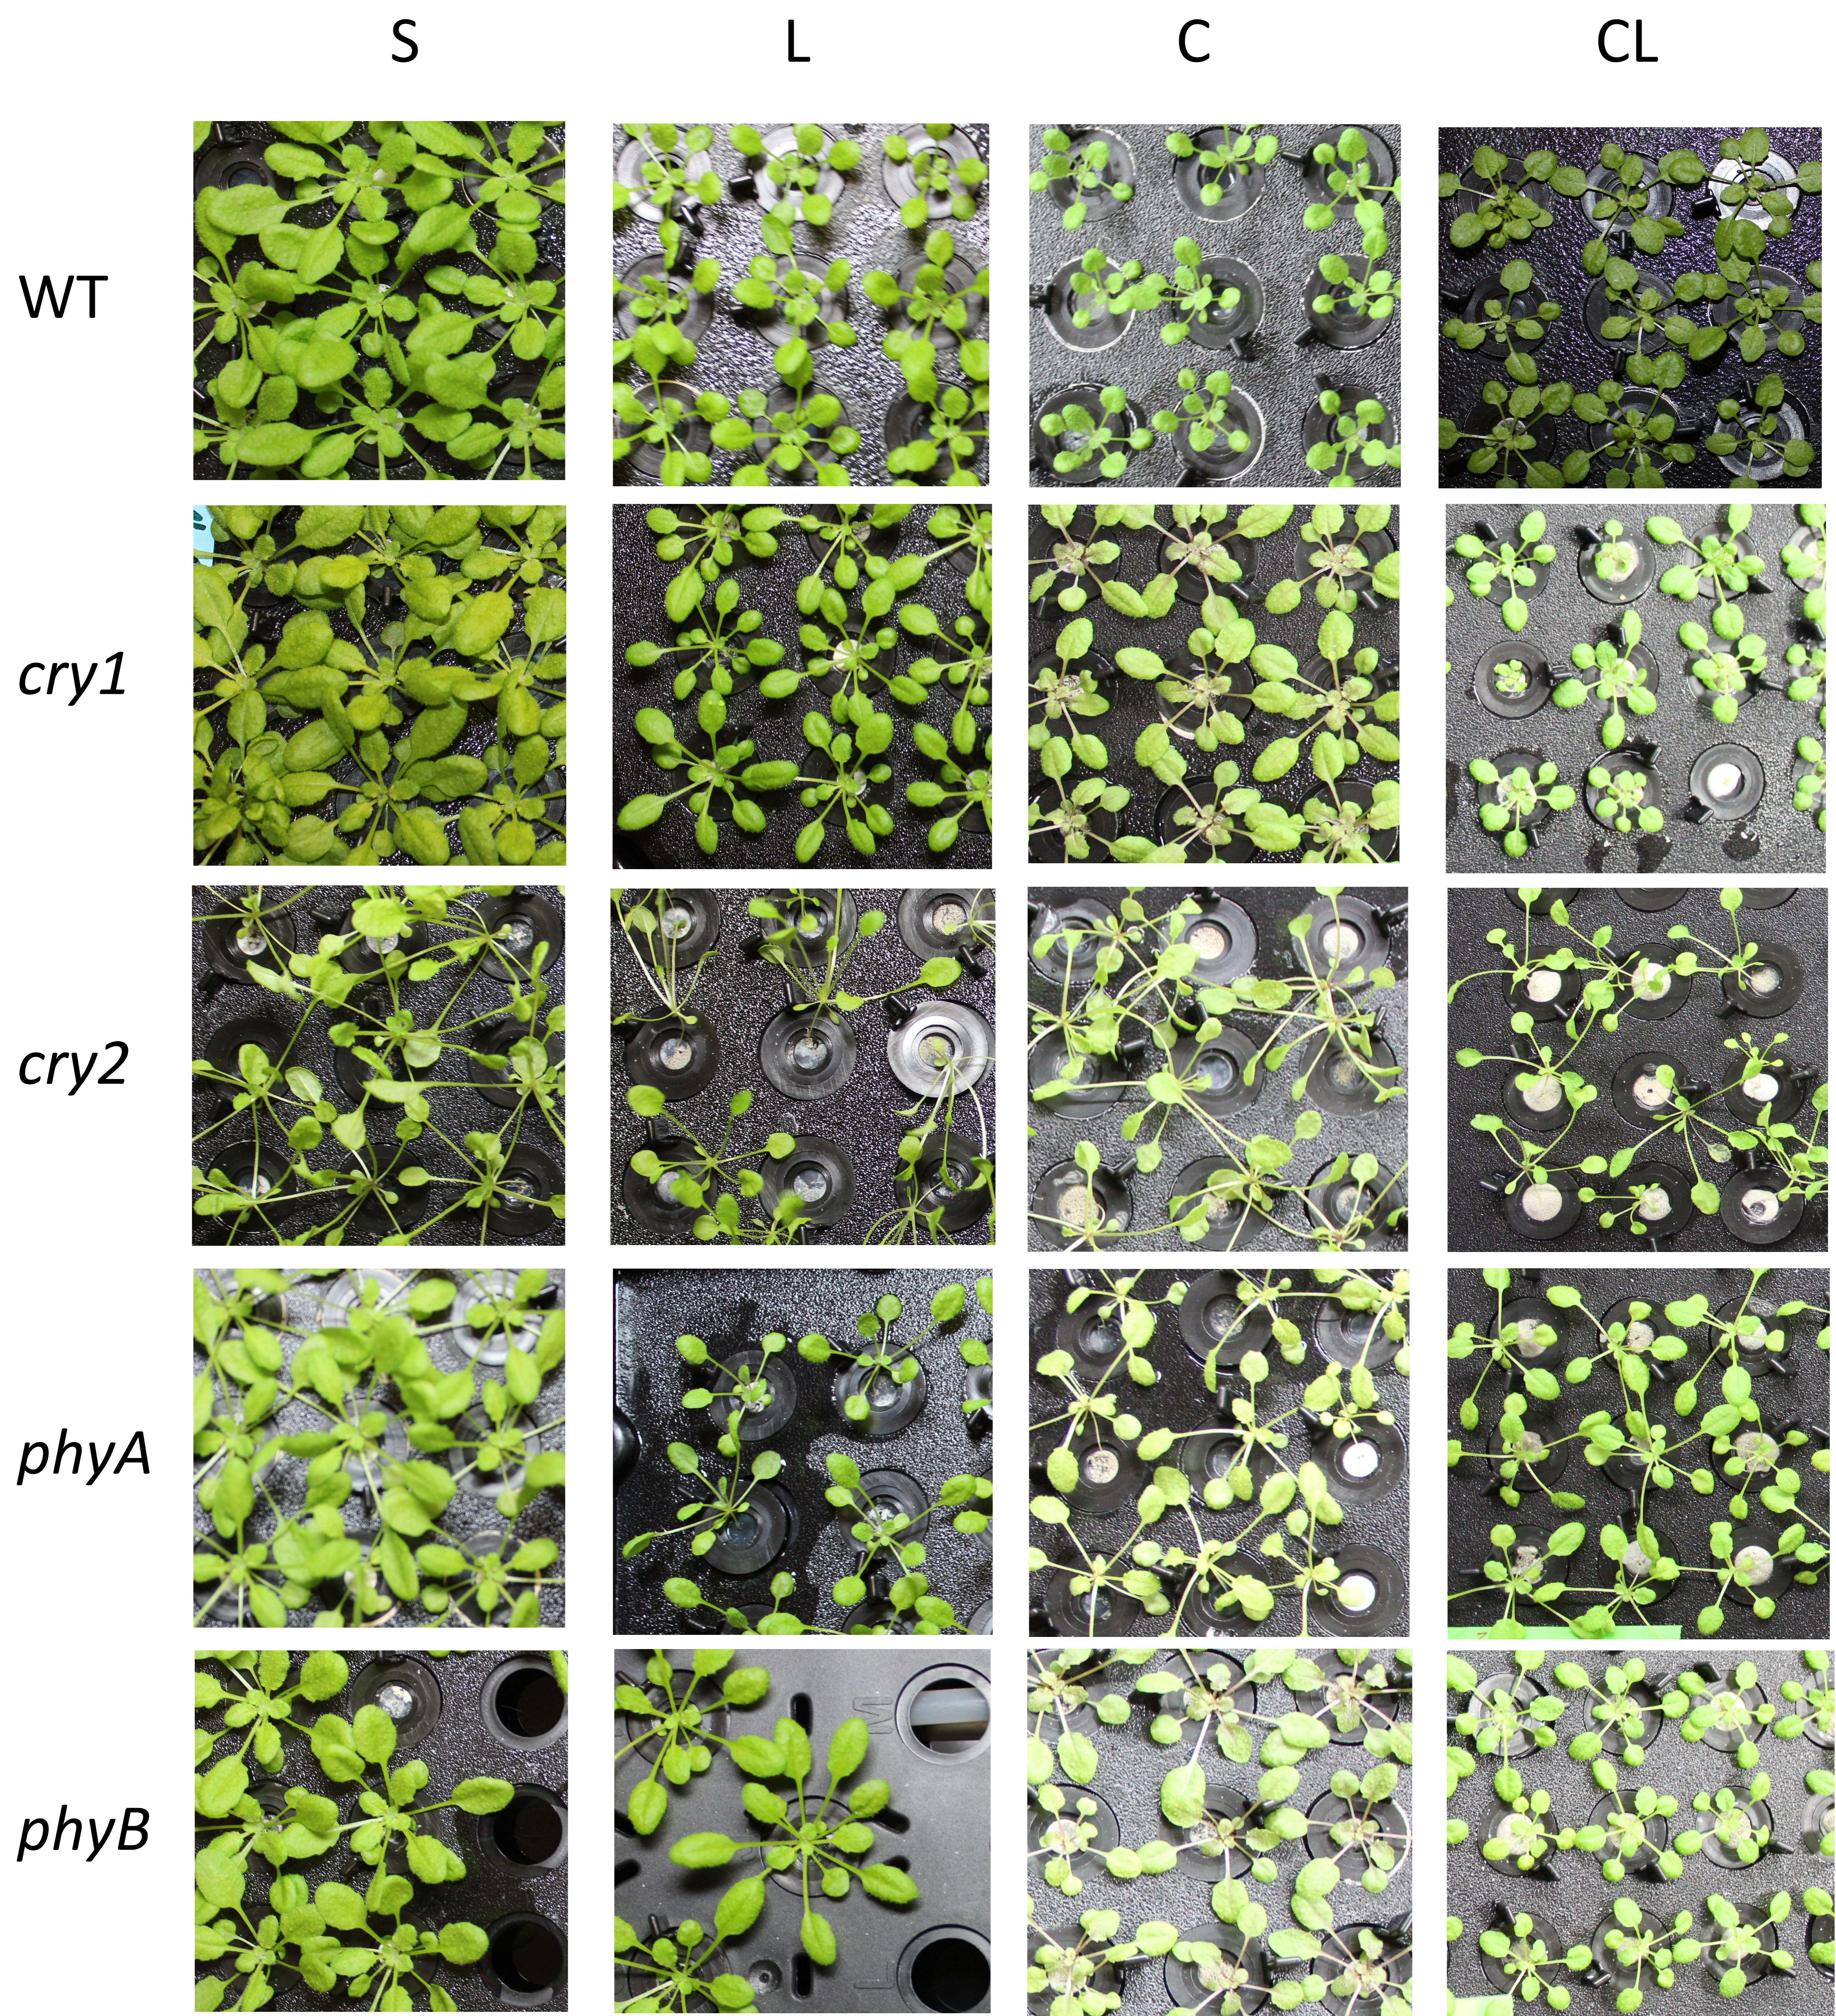

**Figure S1:** Phenotype of the five tested genotypes (WT, *cry1*, *cry2*, *phyA*, and *phyB*) exposed to experimental conditions for 7 days. S - standard conditions (20°C, 150  $\mu\text{mol m}^{-2} \text{s}^{-1}$ ); L - low light conditions (20°C, 20  $\mu\text{mol m}^{-2} \text{s}^{-1}$ ); C - cold (5°C, 150  $\mu\text{mol m}^{-2} \text{s}^{-1}$ ); CL - cold under low light conditions (5°C, 20  $\mu\text{mol m}^{-2} \text{s}^{-1}$ ).
