# Supplementary material for: Light Quality and Intensity Modulate Cold Acclimation in Arabidopsis
Source: Int J Mol Sci. 2021 Mar 8;22(5):2736. doi: 10.3390/ijms22052736 (PMC7962961; doi:10.3390/ijms22052736)
Supplement: Supplementary file 1 [file ijms-22-02736-s001.zip]

Archive with 6 entries (6 files):
- Figure S1-plant phenotype.pdf
- Figure S2-Light spectrum.pdf
- Table S1-Chlorophyll_fluorescence_statistics.xlsx
- Table S2-Phytohormones.xlsx
- Table S3-qPCR.xlsx
- Table S4-Primers.xlsx
