# Supplementary material for: Light Quality and Intensity Modulate Cold Acclimation in Arabidopsis
Source: Int J Mol Sci. 2021 Mar 8;22(5):2736. doi: 10.3390/ijms22052736 (PMC7962961; doi:10.3390/ijms22052736)
Supplement: Supplementary file 1 [file ijms-22-02736-s001.zip › Table S1-Chlorophyll_fluorescence_statistics.xlsx]

## Sheet: Description
The statistic used for comparison of Fv/Fm, QY_Lss, and NPQ_Lss is one-way ANOVA with Tukey's post-hoc test (p<0.05, n=6)
Six biological replicates (leaves) were used for analysis.
Statistical significant differences are marked by different letters (see the detail description below).
The statistics on the sheet Stat_var compare genotypes within each experimental condition and timepoint. Letters used within each condition are:
control		a-e
low light		f-j
cold		k-o
cold + low light		p-t
The statistics on the sheet Stat_gen compare the influence of experimental conditions within each genotype and timepoint. Letters used for genotypes are:
WT		A-D
cry1		E-H
cry2		I-L
phyA		M-P
phyB		Q-T

## Sheet: Stat_var
tissue	time	variant	genotype	Fv/Fm	QY_Lss	NPQ_Lss
leaves	6 h	control	WT	a	ab	a
leaves	6 h	control	cry1	a	b	ab
leaves	6 h	control	cry2	a	ab	ab
leaves	6 h	control	phyA	a	a	b
leaves	6 h	control	phyB	a	b	a
leaves	6 h	low light	WT	fg	f	f
leaves	6 h	low light	cry1	h	f	f
leaves	6 h	low light	cry2	gh	f	f
leaves	6 h	low light	phyA	fg	f	f
leaves	6 h	low light	phyB	f	f	f
leaves	6 h	cold	WT	l	k	m
leaves	6 h	cold	cry1	kl	k	l
leaves	6 h	cold	cry2	kl	k	l
leaves	6 h	cold	phyA	k	k	l
leaves	6 h	cold	phyB	k	k	k
leaves	6 h	cold+low light	WT	p	q	p
leaves	6 h	cold+low light	cry1	p	pq	q
leaves	6 h	cold+low light	cry2	p	pq	q
leaves	6 h	cold+low light	phyA	p	pq	pq
leaves	6 h	cold+low light	phyB	p	p	q
leaves	7 d	control	WT	ab	abc	ab
leaves	7 d	control	cry1	b	c	a
leaves	7 d	control	cry2	ab	bc	ab
leaves	7 d	control	phyA	b	ab	b
leaves	7 d	control	phyB	a	a	b
leaves	7 d	low light	WT	g	h	f
leaves	7 d	low light	cry1	g	h	f
leaves	7 d	low light	cry2	g	h	f
leaves	7 d	low light	phyA	g	g	g
leaves	7 d	low light	phyB	f	g	g
leaves	7 d	cold	WT	kl	kl	k
leaves	7 d	cold	cry1	l	kl	k
leaves	7 d	cold	cry2	k	kl	k
leaves	7 d	cold	phyA	kl	k	k
leaves	7 d	cold	phyB	kl	l	k
leaves	7 d	cold+low light	WT	q	pq	p
leaves	7 d	cold+low light	cry1	p	pq	p
leaves	7 d	cold+low light	cry2	pq	p	p
leaves	7 d	cold+low light	phyA	pq	pq	p
leaves	7 d	cold+low light	phyB	pq	q	p

## Sheet: Stat_gen
tissue	time	genotype	variant	Fv/Fm	QY_Lss	NPQ_Lss
leaves	6 h	WT	control	B	A	A
leaves	6 h	WT	low light	A	A	A
leaves	6 h	WT	cold	C	A	C
leaves	6 h	WT	cold+low light	AB	A	B
leaves	6 h	cry1	control	F	F	E
leaves	6 h	cry1	low light	E	F	E
leaves	6 h	cry1	cold	F	F	F
leaves	6 h	cry1	cold+low light	E	E	F
leaves	6 h	cry2	control	J	K	I
leaves	6 h	cry2	low light	I	JK	I
leaves	6 h	cry2	cold	K	J	K
leaves	6 h	cry2	cold+low light	I	I	J
leaves	6 h	phyA	control	MN	N	M
leaves	6 h	phyA	low light	M	N	M
leaves	6 h	phyA	cold	N	MN	N
leaves	6 h	phyA	cold+low light	M	M	N
leaves	6 h	phyB	control	R	R	Q
leaves	6 h	phyB	low light	Q	R	Q
leaves	6 h	phyB	cold	R	QR	R
leaves	6 h	phyB	cold+low light	Q	Q	R
leaves	7 d	WT	control	A	B	B
leaves	7 d	WT	low light	B	D	A
leaves	7 d	WT	cold	B	C	C
leaves	7 d	WT	cold+low light	A	A	C
leaves	7 d	cry1	control	F	G	G
leaves	7 d	cry1	low light	G	H	F
leaves	7 d	cry1	cold	G	G	H
leaves	7 d	cry1	cold+low light	E	F	H
leaves	7 d	cry2	control	I	J	I
leaves	7 d	cry2	low light	K	K	I
leaves	7 d	cry2	cold	J	J	J
leaves	7 d	cry2	cold+low light	I	I	J
leaves	7 d	phyA	control	M	N	M
leaves	7 d	phyA	low light	N	O	MN
leaves	7 d	phyA	cold	N	N	N
leaves	7 d	phyA	cold+low light	M	M	MN
leaves	7 d	phyB	control	Q	Q	Q
leaves	7 d	phyB	low light	R	R	QR
leaves	7 d	phyB	cold	S	R	S
leaves	7 d	phyB	cold+low light	Q	Q	RS
