# Supplementary material for: Light Quality and Intensity Modulate Cold Acclimation in Arabidopsis
Source: Int J Mol Sci. 2021 Mar 8;22(5):2736. doi: 10.3390/ijms22052736 (PMC7962961; doi:10.3390/ijms22052736)
Supplement: Supplementary file 1 [file ijms-22-02736-s001.zip › Table S2-Phytohormones.xlsx]

## Sheet: Description
The sheet Mean_SD includes the means ± standard deviations of phytohormones and their metabolites. The levels of phytohormones are in pmol g-1 FW.
The statistic used for comparison of phytohormones was one-way ANOVA with Tukey's post-hoc test (p<0.05, n=4).
Four biological replicates were used for analysis.
Statistical significant differences are marked by different letters (see the detail description below).
The statistics on the sheet Stat_var compare genotypes within each experimental condition within each tissue and timepoint. Letters used within each condition are:
control	a-e
low light	f-j
cold	k-o
cold + low light	p-t
The statistics on the sheet Stat_gen compare the influence of experimental conditions within each genotype within each tissue and timepoint. Letters used for genotypes are:
WT	A-D
cry1	E-H
cry2	I-L
phyA	M-P
phyB	Q-T
The statistics on the sheet Stat_time compare the influence of time on WT in control conditions within each tissue separately. Letters used for the statistics are:
WT	A-C
The list of detected phytohormones:
tZ	trans-zeatin
tZR	trans-zeatin riboside
tZ7G	trans-zeatin-7-N-glucoside
tZ9G	trans-zeatin-9-N-glucoside
tZOG	trans-zeatin-O-glucoside
tZROG	trans-zeatin riboside-O-glucoside
tZRMP	trans-zeatin riboside monophosphate
DZR	dihydrozeatin riboside
cZ	cis-zeatin
cZR	cis-zeatin riboside
cZ7G	cis-zeatin-7-N-glucoside
cZROG	cis-zeatin riboside-O-glucoside
cZRMP	cis-zeatin riboside monophosphate
iP	N6-(∆2-isopentenyl)adenine
iPR	N6-(∆2-isopentenyl)adenosine
iP7G	N6-(∆2-isopentenyl)adenine-7-N-glucoside
iP9G	N6-(∆2-isopentenyl)adenine-9-N-glucoside
iPRMP	N6-(∆2-isopentenyl)adenosine monophosphate
CK bases	sum of	tZ	cZ	iP
CK ribosides	sum of	tZR	DZR	cZR	iPR
CK phosphates	sum of	tZRMP	cZRMP	iPRMP
CK O-glucosides	sum of	tZOG	tZROG	cZROG
CK N-glucosides	sum of	tZ7G	tZ9G	cZ7G	iP7G	iP9G
ABA	abscisic acid
PA	phaseic acid
DPA	dihydrophaseic acid
9OH-ABA	9-hydroxy-abscisic acid
ABA metabolites	sum of	PA	DPA	9OH-ABA
GA19	gibberellin GA19
JA	jasmonic acid
JA-Ile	jasmonoyl-isoleucine
IAA	indole-3-acetic acid
IAA-Asp	indole-3-acetic acid aspartate
IAA-GE	indole-3-acetic acid glucosyl ester
OxIAA	oxo-indole-3-acetic acid
OxIAA-GE	oxo-indole-3-acetic acid glucosyl ester
IAA metabolites	sum of	IAA-Asp	IAA-GE	OxIAA	OxIAA-GE
SA	salicylic acid

## Sheet: Mean_SD
tissue	time	variant	genotype	tZ	tZR	tZ7G	tZ9G	tZOG	tZROG	tZRMP	DZR	cZ	cZR	cZ7G	cZROG	cZRMP	iP	iPR	iP7G	iP9G	iPRMP	CK bases	CK ribosides	CK phosphates	CK O-glucosides	CK N-glucosides	IAA	IAA-Asp	IAA-GE	OxIAA	OxIAA-GE	IAM	IAA metabolites	GA19	ABA	PA	DPA	9OH-ABA	ABA metabolites	JA	JA-Ile	SA
apices	30 min	control	WT	1.12 ± 0.34	10.38 ± 2.47	72.45 ± 10.45	42.41 ± 8.25	13.62 ± 6.22	0.49 ± 0.12	29.97 ± 4.73	0.67 ± 0.12	0.25 ± 0.06	0.85 ± 0.26	22.47 ± 6.53	1.03 ± 0.33	11.77 ± 3.55	0.88 ± 0.16	9.70 ± 3.32	22.48 ± 3.06	1.84 ± 0.25	64.06 ± 9.00	2.25 ± 0.36	21.61 ± 4.84	105.80 ± 9.80	15.13 ± 6.34	161.66 ± 17.60	59.99 ± 11.46	108.32 ± 29.96	12.16 ± 2.69	80.44 ± 51.38	2 401.87 ± 430.30	57.13 ± 20.30	2 647.19 ± 399.05	6.42 ± 3.09	17.58 ± 3.45	14.22 ± 8.28	283.48 ± 56.23	7.70 ± 1.41	303.87 ± 121.55	48.94 ± 36.43	29.61 ± 11.85	193.98 ± 59.79
apices	30 min	control	cry1	0.83 ± 0.17	14.56 ± 4.22	69.18 ± 23.16	38.84 ± 10.93	13.22 ± 5.06	0.63 ± 0.11	31.85 ± 11.41	0.81 ± 0.25	0.17 ± 0.11	1.16 ± 0.58	24.43 ± 4.27	1.08 ± 0.23	8.26 ± 3.29	0.91 ± 0.20	9.88 ± 4.44	21.45 ± 3.93	1.95 ± 0.46	80.45 ± 36.52	1.91 ± 0.37	26.41 ± 7.55	120.56 ± 39.05	14.93 ± 5.21	155.84 ± 37.17	76.02 ± 27.72	154.94 ± 47.67	6.56 ± 3.01	83.11 ± 23.53	2 017.72 ± 471.75	65.84 ± 24.07	2 275.80 ± 508.23	4.66 ± 1.52	19.26 ± 8.33	11.74 ± 4.61	353.24 ± 81.89	5.94 ± 1.44	370.92 ± 76.84	97.56 ± 43.21	21.08 ± 8.43	196.94 ± 49.68
apices	30 min	control	cry2	0.77 ± 0.20	13.37 ± 4.82	64.07 ± 5.30	36.59 ± 5.02	10.81 ± 1.30	0.55 ± 0.05	34.58 ± 4.19	0.74 ± 0.11	0.19 ± 0.09	0.94 ± 0.21	23.60 ± 1.13	1.38 ± 0.32	8.14 ± 1.70	0.69 ± 0.14	7.79 ± 1.87	22.30 ± 1.95	2.06 ± 0.49	67.44 ± 6.26	1.66 ± 0.25	22.84 ± 5.82	110.15 ± 4.15	12.74 ± 1.03	148.62 ± 8.70	58.06 ± 18.28	181.86 ± 45.32	12.12 ± 6.27	74.51 ± 26.18	2 121.57 ± 551.62	51.66 ± 8.56	2 396.82 ± 684.55	3.98 ± 1.54	13.98 ± 5.32	13.65 ± 5.18	315.50 ± 22.99	7.76 ± 0.47	336.89 ± 25.34	103.29 ± 67.99	17.60 ± 7.04	214.74 ± 81.10
apices	30 min	control	phyA	0.97 ± 0.17	17.79 ± 5.51	75.55 ± 11.90	41.79 ± 9.37	15.11 ± 2.12	0.66 ± 0.14	45.53 ± 12.52	0.65 ± 0.18	0.14 ± 0.13	0.95 ± 0.47	22.54 ± 6.55	1.37 ± 0.57	7.47 ± 3.22	0.64 ± 0.15	8.72 ± 3.69	22.53 ± 2.57	2.20 ± 0.61	71.18 ± 19.35	1.75 ± 0.31	28.11 ± 8.99	124.18 ± 32.42	17.15 ± 1.97	164.61 ± 24.75	64.16 ± 27.35	168.28 ± 53.00	12.63 ± 4.26	85.36 ± 24.74	2 406.94 ± 553.20	52.53 ± 14.33	2 685.35 ± 677.74	3.30 ± 2.75	15.32 ± 5.69	14.65 ± 6.18	299.40 ± 64.63	11.85 ± 5.80	325.90 ± 76.34	81.40 ± 41.41	11.71 ± 4.68	197.27 ± 46.14
apices	30 min	control	phyB	0.76 ± 0.14	10.14 ± 2.92	45.30 ± 4.60	25.50 ± 2.79	9.81 ± 5.46	0.37 ± 0.05	24.25 ± 4.78	0.82 ± 0.23	0.16 ± 0.08	0.99 ± 0.64	20.55 ± 1.86	1.00 ± 0.06	8.48 ± 4.41	0.96 ± 0.38	5.07 ± 2.37	16.17 ± 2.01	1.94 ± 1.02	39.84 ± 9.68	1.89 ± 0.36	17.02 ± 5.89	72.56 ± 13.44	11.18 ± 5.45	109.47 ± 7.04	96.88 ± 26.10	147.14 ± 43.55	12.98 ± 5.06	92.78 ± 38.45	2 009.38 ± 540.50	55.08 ± 16.04	2 298.05 ± 586.50	3.29 ± 1.65	19.97 ± 5.28	11.89 ± 5.96	377.01 ± 58.24	4.87 ± 1.39	393.64 ± 56.90	130.19 ± 124.79	13.58 ± 5.43	172.42 ± 65.25
apices	30 min	low light	WT	1.91 ± 0.89	16.26 ± 6.64	91.96 ± 17.43	52.56 ± 15.48	14.18 ± 4.93	0.66 ± 0.19	37.02 ± 8.35	0.45 ± 0.08	0.51 ± 0.34	0.89 ± 0.22	24.98 ± 0.52	1.51 ± 0.43	11.08 ± 6.84	0.79 ± 0.17	5.96 ± 2.31	24.39 ± 2.61	2.40 ± 1.30	47.69 ± 13.61	3.21 ± 0.98	23.56 ± 8.80	95.78 ± 20.46	16.35 ± 4.91	196.28 ± 32.68	49.85 ± 21.42	357.29 ± 263.72	9.47 ± 1.74	66.86 ± 12.73	1 913.59 ± 319.65	81.81 ± 19.90	2 358.46 ± 424.80	4.91 ± 1.60	13.53 ± 2.72	13.81 ± 3.59	316.44 ± 72.53	7.61 ± 5.45	337.86 ± 68.99	87.86 ± 41.72	7.71 ± 6.76	156.20 ± 23.19
apices	30 min	low light	cry1	1.70 ± 0.79	15.06 ± 5.52	90.27 ± 15.07	51.20 ± 9.89	18.68 ± 7.69	0.66 ± 0.24	33.77 ± 7.86	0.44 ± 0.10	0.35 ± 0.24	1.33 ± 0.37	27.05 ± 3.86	1.00 ± 0.14	12.72 ± 6.66	0.91 ± 0.46	5.93 ± 1.66	23.16 ± 4.07	2.03 ± 0.51	43.53 ± 19.85	2.97 ± 0.94	22.77 ± 7.33	81.31 ± 26.05	20.33 ± 7.84	193.71 ± 31.66	51.41 ± 9.28	291.87 ± 123.90	10.96 ± 3.63	82.32 ± 26.51	1 647.77 ± 465.80	76.72 ± 29.06	2 041.25 ± 777.92	3.87 ± 2.00	12.89 ± 5.27	10.06 ± 5.97	442.06 ± 99.44	8.76 ± 2.47	460.88 ± 95.51	112.74 ± 80.19	6.11 ± 2.44	212.10 ± 71.47
apices	30 min	low light	cry2	1.56 ± 1.03	10.36 ± 2.89	64.54 ± 16.57	34.59 ± 12.71	8.51 ± 1.26	0.64 ± 0.16	23.06 ± 1.99	0.38 ± 0.02	0.54 ± 0.37	0.68 ± 0.35	26.24 ± 5.10	1.98 ± 0.56	10.50 ± 7.70	0.78 ± 0.25	5.43 ± 1.95	27.79 ± 4.29	2.65 ± 1.08	38.61 ± 10.16	2.88 ± 1.61	16.85 ± 4.66	72.16 ± 12.88	11.13 ± 1.37	155.81 ± 37.41	53.69 ± 27.66	360.05 ± 159.43	9.57 ± 4.62	77.29 ± 21.11	1 479.37 ± 205.28	76.69 ± 26.42	1 940.31 ± 259.31	2.89 ± 1.34	8.70 ± 0.68	13.10 ± 4.67	264.21 ± 70.22	7.17 ± 3.57	284.48 ± 76.67	123.24 ± 72.08	12.98 ± 8.74	182.17 ± 41.72
apices	30 min	low light	phyA	2.19 ± 0.99	18.46 ± 2.02	87.65 ± 8.99	49.72 ± 4.02	17.13 ± 5.86	0.68 ± 0.11	42.93 ± 9.11	0.63 ± 0.12	0.56 ± 0.36	1.20 ± 0.17	21.16 ± 3.69	0.95 ± 0.09	8.51 ± 1.66	1.23 ± 0.41	9.09 ± 1.53	24.17 ± 1.15	2.31 ± 0.70	73.86 ± 11.24	3.98 ± 1.69	29.38 ± 3.61	125.29 ± 19.07	18.76 ± 5.88	185.02 ± 13.94	78.11 ± 25.24	467.94 ± 431.51	10.84 ± 2.54	95.26 ± 29.85	2 312.61 ± 444.52	41.83 ± 14.74	2 901.93 ± 789.62	1.80 ± 0.83	13.03 ± 1.32	10.80 ± 2.00	290.43 ± 59.16	6.18 ± 3.02	307.41 ± 56.83	152.89 ± 95.14	8.05 ± 3.22	233.24 ± 59.65
apices	30 min	low light	phyB	1.16 ± 0.54	7.41 ± 0.30	48.74 ± 8.02	28.40 ± 2.83	6.10 ± 1.00	0.47 ± 0.28	14.77 ± 0.57	0.52 ± 0.21	0.57 ± 0.33	0.99 ± 0.29	20.62 ± 1.03	1.11 ± 0.75	7.55 ± 2.10	1.11 ± 0.59	3.14 ± 0.22	20.66 ± 0.47	1.37 ± 0.18	28.36 ± 2.64	2.84 ± 0.12	12.05 ± 0.81	50.68 ± 3.89	7.68 ± 2.03	119.79 ± 11.61	144.89 ± 0.28	792.59 ± 451.02	4.73 ± 3.04	160.21 ± 25.99	1 863.27 ± 256.91	67.30 ± 35.31	2 846.86 ± 171.45	2.39 ± 0.32	17.90 ± 4.51	15.55 ± 6.46	348.64 ± 44.52	7.81 ± 3.83	372.00 ± 19.66	196.78 ± 67.22	23.37 ± 13.54	252.68 ± 31.42
apices	30 min	cold	WT	1.81 ± 0.96	18.36 ± 3.68	99.86 ± 22.26	44.84 ± 13.98	12.33 ± 3.16	0.79 ± 0.13	42.74 ± 7.55	0.84 ± 0.30	0.21 ± 0.16	1.07 ± 0.21	23.84 ± 2.68	2.29 ± 0.53	8.04 ± 2.41	0.57 ± 0.06	5.72 ± 1.44	33.08 ± 7.71	2.56 ± 0.57	66.50 ± 20.21	2.59 ± 1.11	25.99 ± 4.63	117.28 ± 27.65	15.41 ± 2.64	204.18 ± 31.07	53.71 ± 25.51	210.31 ± 86.74	7.94 ± 1.57	67.43 ± 20.31	2 529.99 ± 803.41	78.12 ± 20.44	2 825.55 ± 1 122.59	3.96 ± 0.83	12.31 ± 3.12	6.57 ± 3.49	237.10 ± 59.72	5.00 ± 3.93	248.67 ± 62.88	74.56 ± 48.70	14.04 ± 5.61	200.54 ± 66.74
apices	30 min	cold	cry1	1.46 ± 0.61	16.80 ± 1.91	73.74 ± 12.04	42.99 ± 8.48	13.52 ± 4.57	0.52 ± 0.14	34.60 ± 11.81	0.45 ± 0.11	1.05 ± 0.75	0.53 ± 0.23	21.88 ± 1.03	0.76 ± 0.13	3.33 ± 0.77	0.81 ± 0.27	5.42 ± 1.34	24.08 ± 4.30	1.97 ± 0.50	50.59 ± 6.72	3.32 ± 1.06	23.20 ± 1.79	88.53 ± 17.42	14.80 ± 4.80	164.65 ± 23.54	91.68 ± 25.54	188.37 ± 122.96	1.92 ± 0.91	53.06 ± 7.35	1 176.39 ± 256.66	39.54 ± 2.73	1 424.58 ± 349.65	3.34 ± 0.35	11.21 ± 0.53	9.52 ± 2.18	307.43 ± 62.26	6.46 ± 0.48	323.41 ± 61.05	125.49 ± 104.69	9.86 ± 3.95	172.83 ± 33.94
apices	30 min	cold	cry2	1.47 ± 0.78	14.22 ± 0.77	108.62 ± 12.05	60.07 ± 13.07	15.59 ± 1.23	0.66 ± 0.21	42.10 ± 10.76	0.50 ± 0.08	0.30 ± 0.27	0.66 ± 0.17	21.68 ± 1.07	1.26 ± 0.10	5.84 ± 0.71	0.70 ± 0.14	5.85 ± 1.88	23.91 ± 0.65	2.62 ± 1.04	48.50 ± 15.13	2.47 ± 1.03	21.23 ± 2.00	96.44 ± 25.02	17.51 ± 1.25	216.90 ± 24.99	71.03 ± 19.06	240.30 ± 124.14	6.35 ± 3.64	49.25 ± 25.48	1 701.74 ± 151.26	41.12 ± 14.05	2 015.27 ± 235.32	5.58 ± 2.33	10.54 ± 3.97	8.41 ± 2.49	298.50 ± 27.32	2.85 ± 1.43	309.77 ± 28.84	102.87 ± 37.10	9.99 ± 3.51	160.94 ± 29.05
apices	30 min	cold	phyA	2.12 ± 1.22	18.74 ± 4.82	99.24 ± 23.67	51.48 ± 17.42	21.10 ± 7.14	0.81 ± 0.30	47.08 ± 16.44	0.70 ± 0.21	0.68 ± 0.65	1.11 ± 0.35	23.59 ± 4.91	1.81 ± 0.57	8.14 ± 2.25	0.84 ± 0.50	5.70 ± 1.53	27.17 ± 10.01	2.93 ± 1.46	50.93 ± 16.37	3.64 ± 1.74	26.24 ± 6.32	106.15 ± 28.61	23.72 ± 6.35	204.41 ± 46.59	48.04 ± 22.54	257.20 ± 109.18	7.39 ± 4.49	61.15 ± 19.54	1 753.21 ± 521.22	78.24 ± 15.05	2 095.81 ± 292.49	3.38 ± 2.66	8.75 ± 2.92	8.41 ± 4.13	269.33 ± 63.45	5.03 ± 3.60	320.63 ± 36.75	60.97 ± 45.55	9.72 ± 3.89	164.50 ± 87.71
apices	30 min	cold	phyB	1.63 ± 0.79	13.17 ± 6.62	54.42 ± 4.73	28.46 ± 7.90	8.03 ± 2.20	0.56 ± 0.15	34.62 ± 12.95	0.80 ± 0.31	0.25 ± 0.13	0.81 ± 0.34	20.34 ± 3.31	1.35 ± 0.37	5.92 ± 1.92	1.49 ± 0.63	2.94 ± 0.84	20.23 ± 2.45	2.61 ± 1.54	31.85 ± 8.76	3.37 ± 0.95	17.73 ± 7.62	72.40 ± 20.08	9.94 ± 1.96	126.06 ± 14.98	159.33 ± 69.33	172.85 ± 127.39	10.46 ± 4.47	103.27 ± 46.20	1 965.92 ± 317.85	53.47 ± 13.22	2 272.66 ± 362.35	6.08 ± 1.73	15.39 ± 4.67	9.82 ± 3.45	339.00 ± 33.86	6.75 ± 3.05	355.71 ± 57.05	105.84 ± 83.43	16.83 ± 6.73	186.68 ± 63.10
apices	30 min	cold+low light	WT	1.73 ± 0.50	14.69 ± 9.60	34.12 ± 22.80	29.13 ± 8.36	5.61 ± 2.78	0.41 ± 0.32	23.62 ± 10.82	0.46 ± 0.35	0.48 ± 0.38	1.71 ± 0.92	19.93 ± 4.84	0.37 ± 0.11	10.55 ± 4.77	0.74 ± 0.24	4.78 ± 0.98	29.97 ± 11.83	2.57 ± 0.54	11.03 ± 5.40	2.95 ± 0.86	21.64 ± 8.62	45.20 ± 9.27	4.99 ± 3.05	101.39 ± 39.93	51.06 ± 34.47	271.40 ± 176.42	1.82 ± 1.12	345.31 ± 138.16	1 532.18 ± 288.61	10.17 ± 1.60	2 156.76 ± 862.70	4.71 ± 0.66	13.90 ± 10.09	11.66 ± 7.63	129.51 ± 49.19	4.68 ± 2.87	144.68 ± 57.87	124.36 ± 66.65	4.07 ± 1.63	196.87 ± 52.77
apices	30 min	cold+low light	cry1	1.29 ± 0.20	11.29 ± 6.04	72.28 ± 17.69	41.36 ± 8.46	11.86 ± 5.42	0.62 ± 0.12	31.98 ± 16.35	0.44 ± 0.18	0.54 ± 0.36	1.06 ± 0.89	29.57 ± 0.55	1.67 ± 0.54	7.48 ± 1.14	0.57 ± 0.10	3.71 ± 2.01	24.28 ± 2.83	2.36 ± 0.30	51.65 ± 25.54	2.40 ± 0.47	16.50 ± 8.50	91.10 ± 32.71	14.15 ± 5.15	169.84 ± 24.65	72.44 ± 20.71	793.10 ± 448.84	0.63 ± 0.10	60.47 ± 18.54	1 080.53 ± 316.57	49.09 ± 38.37	1 940.28 ± 511.57	2.01 ± 1.19	9.96 ± 2.75	20.76 ± 2.59	299.71 ± 49.69	13.71 ± 1.30	334.18 ± 45.80	185.96 ± 54.99	26.77 ± 14.97	137.75 ± 43.04
apices	30 min	cold+low light	cry2	1.75 ± 0.76	17.90 ± 1.63	90.26 ± 7.62	50.75 ± 3.10	12.35 ± 1.59	0.67 ± 0.08	35.76 ± 4.50	0.70 ± 0.18	1.16 ± 0.78	1.02 ± 0.32	23.57 ± 2.31	1.56 ± 0.19	9.21 ± 0.40	0.79 ± 0.26	5.43 ± 0.22	26.40 ± 2.84	2.15 ± 0.26	44.62 ± 3.66	3.70 ± 1.79	25.05 ± 1.89	89.59 ± 3.48	14.58 ± 1.54	193.13 ± 8.90	86.16 ± 37.67	422.56 ± 253.76	7.19 ± 3.11	72.78 ± 17.26	1 251.63 ± 296.03	93.82 ± 41.88	1 763.49 ± 352.70	4.79 ± 2.43	12.11 ± 1.75	15.71 ± 5.38	283.61 ± 23.36	8.03 ± 3.67	307.35 ± 26.73	235.48 ± 55.47	32.31 ± 12.92	153.51 ± 35.38
apices	30 min	cold+low light	phyA	0.94 ± 0.55	11.81 ± 4.14	58.66 ± 11.74	30.24 ± 5.66	7.13 ± 0.36	0.52 ± 0.12	23.16 ± 5.87	0.49 ± 0.12	0.89 ± 0.77	1.26 ± 0.92	16.60 ± 4.90	1.26 ± 0.69	6.95 ± 1.14	0.58 ± 0.18	5.38 ± 1.65	23.08 ± 8.63	2.35 ± 0.74	71.11 ± 10.42	2.40 ± 1.18	18.94 ± 4.42	101.22 ± 14.07	8.91 ± 0.48	130.92 ± 27.41	43.39 ± 13.78	176.37 ± 82.39	4.12 ± 2.33	72.49 ± 11.28	1 455.24 ± 419.47	26.19 ± 5.73	1 603.09 ± 680.44	3.78 ± 1.83	10.46 ± 1.92	11.09 ± 4.75	257.17 ± 54.30	8.67 ± 5.54	276.92 ± 50.19	248.98 ± 67.28	42.56 ± 21.23	161.28 ± 36.66
apices	30 min	cold+low light	phyB	1.03 ± 0.22	5.54 ± 2.87	44.89 ± 22.67	23.66 ± 10.85	3.21 ± 0.01	0.28 ± 0.02	16.17 ± 9.44	0.67 ± 0.28	1.66 ± 1.20	0.80 ± 0.62	22.05 ± 2.81	1.70 ± 0.78	6.00 ± 1.09	1.69 ± 0.60	1.80 ± 0.48	17.48 ± 3.95	1.17 ± 0.42	19.83 ± 8.03	4.38 ± 1.95	8.82 ± 4.16	42.00 ± 17.60	5.18 ± 0.78	109.24 ± 36.72	160.20 ± 35.95	739.75 ± 231.18	9.59 ± 2.59	130.37 ± 52.90	1 394.04 ± 409.55	56.97 ± 24.58	2 282.60 ± 325.50	9.33 ± 1.48	11.66 ± 3.13	10.36 ± 7.07	309.81 ± 112.62	7.97 ± 2.36	328.14 ± 136.65	243.31 ± 38.82	23.44 ± 11.58	400.11 ± 233.24
apices	6 h	control	WT	3.05 ± 0.33	36.82 ± 9.49	102.62 ± 29.29	50.50 ± 18.66	17.29 ± 8.69	1.08 ± 0.11	67.53 ± 15.45	0.89 ± 0.32	0.33 ± 0.16	1.22 ± 0.75	25.85 ± 5.77	1.39 ± 0.32	4.96 ± 3.23	0.98 ± 0.24	17.66 ± 1.57	26.27 ± 4.40	5.38 ± 1.96	234.90 ± 55.37	4.36 ± 0.53	56.59 ± 11.01	307.39 ± 45.33	19.76 ± 9.09	210.62 ± 59.65	87.84 ± 28.00	258.88 ± 131.05	12.13 ± 3.73	83.23 ± 12.20	2 586.96 ± 629.43	26.60 ± 11.78	2 958.94 ± 423.50	5.11 ± 2.57	21.16 ± 1.77	21.95 ± 5.21	358.88 ± 108.05	9.72 ± 1.79	390.56 ± 37.19	219.55 ± 68.97	47.74 ± 32.62	290.76 ± 154.41
apices	6 h	control	cry1	1.45 ± 0.19	30.98 ± 12.34	68.11 ± 16.34	35.61 ± 10.30	9.31 ± 3.94	0.56 ± 0.08	52.91 ± 15.38	0.62 ± 0.12	0.18 ± 0.13	1.68 ± 0.65	19.89 ± 4.72	0.94 ± 0.12	6.29 ± 2.86	0.74 ± 0.33	17.18 ± 4.00	20.44 ± 4.31	2.51 ± 0.67	164.20 ± 33.26	2.36 ± 0.44	50.46 ± 16.14	196.03 ± 78.81	10.80 ± 4.03	146.55 ± 34.93	80.05 ± 17.70	244.57 ± 133.75	6.07 ± 3.02	65.07 ± 20.24	1 632.37 ± 297.26	28.48 ± 16.15	1 968.55 ± 209.86	5.21 ± 2.85	19.71 ± 3.08	11.33 ± 1.44	295.77 ± 112.08	7.16 ± 3.68	313.07 ± 85.53	193.88 ± 51.00	34.58 ± 13.83	264.28 ± 102.04
apices	6 h	control	cry2	2.38 ± 0.48	39.08 ± 16.78	87.60 ± 15.79	42.08 ± 7.11	12.75 ± 5.92	1.00 ± 0.44	71.73 ± 18.28	0.73 ± 0.15	0.14 ± 0.08	0.81 ± 0.28	22.01 ± 3.49	1.67 ± 0.58	3.95 ± 0.85	0.74 ± 0.25	17.50 ± 2.00	23.77 ± 4.77	3.68 ± 2.35	166.24 ± 20.71	3.26 ± 0.43	58.12 ± 18.32	241.92 ± 35.96	15.42 ± 5.84	179.15 ± 29.12	72.09 ± 29.99	195.43 ± 55.89	12.98 ± 4.54	66.60 ± 37.63	2 086.23 ± 418.56	30.75 ± 14.16	2 383.18 ± 244.17	3.84 ± 1.98	15.20 ± 2.59	17.65 ± 9.37	232.95 ± 52.48	10.14 ± 4.67	260.74 ± 46.18	326.03 ± 135.57	37.03 ± 14.81	367.14 ± 166.79
apices	6 h	control	phyA	2.36 ± 0.46	34.74 ± 12.85	86.95 ± 20.60	45.66 ± 15.88	14.24 ± 5.83	0.86 ± 0.31	67.72 ± 19.68	0.90 ± 0.24	0.27 ± 0.11	1.04 ± 0.44	23.55 ± 5.64	1.46 ± 0.35	3.37 ± 1.26	1.06 ± 0.36	18.19 ± 3.55	27.00 ± 5.91	4.64 ± 2.30	198.01 ± 45.18	3.69 ± 0.51	54.87 ± 13.93	269.11 ± 53.79	16.55 ± 5.64	187.80 ± 39.64	96.57 ± 30.00	345.01 ± 152.53	8.58 ± 4.89	99.12 ± 19.37	2 856.77 ± 589.62	37.22 ± 13.12	3 313.74 ± 704.85	4.51 ± 2.91	20.55 ± 3.50	19.51 ± 3.14	341.86 ± 111.08	10.79 ± 4.66	372.41 ± 77.32	208.51 ± 74.14	24.43 ± 9.61	390.59 ± 181.63
apices	6 h	control	phyB	1.63 ± 0.12	18.17 ± 9.01	53.39 ± 4.79	25.24 ± 3.23	8.72 ± 2.49	0.68 ± 0.29	35.24 ± 7.07	0.73 ± 0.22	0.12 ± 0.05	0.55 ± 0.18	19.51 ± 1.79	0.93 ± 0.11	3.63 ± 0.75	1.12 ± 0.37	14.50 ± 2.95	19.42 ± 5.86	5.36 ± 2.57	143.81 ± 27.44	2.87 ± 0.39	33.95 ± 9.36	182.67 ± 30.23	10.33 ± 2.36	122.92 ± 14.15	126.40 ± 52.53	209.21 ± 37.58	15.94 ± 2.95	76.13 ± 13.05	2 091.69 ± 178.52	35.74 ± 21.25	2 428.53 ± 137.54	3.99 ± 3.24	21.09 ± 4.84	20.78 ± 6.00	400.32 ± 101.35	11.06 ± 5.91	432.16 ± 76.55	265.03 ± 84.35	32.29 ± 12.91	280.47 ± 128.40
apices	6 h	low light	WT	1.19 ± 0.22	12.37 ± 3.50	89.12 ± 13.27	46.73 ± 10.06	11.33 ± 2.52	0.56 ± 0.08	31.38 ± 9.23	0.40 ± 0.12	0.18 ± 0.02	2.33 ± 0.78	27.47 ± 1.76	1.92 ± 0.11	15.77 ± 7.09	0.54 ± 0.11	5.53 ± 0.99	24.20 ± 3.14	2.44 ± 1.55	52.47 ± 18.72	1.91 ± 0.34	20.63 ± 5.12	99.62 ± 32.54	13.81 ± 2.45	189.97 ± 24.42	47.49 ± 9.79	212.91 ± 60.40	11.68 ± 1.17	79.07 ± 38.74	2 154.38 ± 529.42	98.93 ± 39.01	2 487.76 ± 586.49	4.04 ± 0.18	14.37 ± 3.27	14.86 ± 3.37	306.18 ± 59.12	7.96 ± 2.23	329.00 ± 62.39	66.56 ± 22.20	8.65 ± 3.71	147.50 ± 50.51
apices	6 h	low light	cry1	1.11 ± 0.25	9.72 ± 1.35	74.18 ± 11.39	40.08 ± 6.56	12.85 ± 3.62	0.53 ± 0.07	33.10 ± 13.04	0.40 ± 0.08	0.09 ± 0.05	1.49 ± 0.25	32.19 ± 5.43	1.32 ± 0.22	9.11 ± 0.18	0.67 ± 0.19	5.46 ± 0.82	22.94 ± 2.10	4.34 ± 2.89	56.31 ± 10.52	1.87 ± 0.43	17.07 ± 2.42	98.52 ± 20.21	14.70 ± 3.68	173.74 ± 25.05	63.24 ± 14.48	184.46 ± 59.19	6.56 ± 1.63	74.87 ± 18.95	1 850.57 ± 288.08	57.84 ± 22.43	2 135.73 ± 354.93	2.32 ± 0.67	14.70 ± 0.96	10.96 ± 2.05	319.97 ± 55.89	5.02 ± 0.73	335.95 ± 57.78	87.94 ± 17.57	12.98 ± 4.83	170.90 ± 39.88
apices	6 h	low light	cry2	1.25 ± 0.35	12.12 ± 3.79	90.09 ± 4.40	46.39 ± 3.09	17.15 ± 0.80	0.57 ± 0.04	31.94 ± 7.20	0.66 ± 0.15	0.18 ± 0.06	2.02 ± 0.44	26.64 ± 4.80	1.59 ± 0.24	13.74 ± 4.26	0.94 ± 0.05	7.90 ± 1.09	25.42 ± 1.55	3.15 ± 0.84	77.85 ± 8.57	2.37 ± 0.39	22.69 ± 4.51	123.54 ± 12.19	19.31 ± 0.86	191.68 ± 5.74	69.93 ± 13.69	283.43 ± 37.41	10.75 ± 2.80	82.99 ± 25.32	2 450.54 ± 981.91	52.67 ± 17.02	2 863.05 ± 978.05	7.48 ± 2.73	16.65 ± 3.29	14.16 ± 2.40	335.05 ± 10.69	9.14 ± 5.36	358.35 ± 71.67	184.85 ± 55.26	20.06 ± 8.59	269.53 ± 114.69
apices	6 h	low light	phyA	1.17 ± 0.12	10.14 ± 3.03	86.64 ± 6.78	45.40 ± 6.00	17.76 ± 3.47	0.63 ± 0.07	38.68 ± 17.64	0.41 ± 0.09	0.16 ± 0.01	1.60 ± 0.41	28.16 ± 3.96	2.20 ± 0.29	11.12 ± 2.98	0.80 ± 0.24	4.86 ± 0.65	25.96 ± 2.99	4.33 ± 2.48	54.82 ± 5.77	2.12 ± 0.33	17.02 ± 3.49	104.62 ± 13.68	20.60 ± 3.51	190.48 ± 16.11	42.81 ± 15.50	273.78 ± 63.70	10.62 ± 1.50	81.34 ± 12.38	2 092.35 ± 528.58	53.52 ± 10.25	2 474.60 ± 545.64	6.04 ± 3.07	12.21 ± 1.92	19.55 ± 4.10	229.69 ± 29.51	7.10 ± 1.19	256.34 ± 28.80	165.16 ± 79.03	33.52 ± 24.90	188.05 ± 47.91
apices	6 h	low light	phyB	0.94 ± 0.33	5.80 ± 1.27	58.39 ± 12.01	28.96 ± 6.24	8.84 ± 4.09	0.48 ± 0.17	19.36 ± 3.30	0.43 ± 0.16	0.17 ± 0.14	1.39 ± 0.43	25.08 ± 5.48	1.46 ± 0.24	10.04 ± 3.96	0.70 ± 0.25	3.68 ± 2.17	17.06 ± 3.74	5.32 ± 2.41	36.76 ± 16.89	1.82 ± 0.67	11.30 ± 3.48	66.16 ± 22.15	10.78 ± 4.29	134.82 ± 28.96	149.05 ± 32.48	367.96 ± 90.04	11.32 ± 5.15	131.67 ± 16.65	2 527.95 ± 314.99	43.15 ± 3.43	3 107.99 ± 322.39	4.48 ± 0.79	17.50 ± 2.28	13.97 ± 3.50	355.12 ± 60.49	5.91 ± 2.82	374.99 ± 62.46	134.16 ± 80.11	21.93 ± 16.83	184.30 ± 18.42
apices	6 h	cold	WT	1.48 ± 0.37	15.98 ± 6.49	63.59 ± 20.02	38.01 ± 6.10	15.95 ± 4.15	0.57 ± 0.15	32.79 ± 10.55	0.61 ± 0.13	0.11 ± 0.05	0.48 ± 0.08	19.41 ± 3.67	1.88 ± 0.62	2.50 ± 0.71	1.31 ± 0.56	5.08 ± 1.09	28.36 ± 6.93	4.36 ± 1.66	51.16 ± 22.50	2.89 ± 0.89	22.15 ± 7.78	86.45 ± 32.38	18.40 ± 4.15	153.73 ± 25.86	35.72 ± 16.41	196.30 ± 62.98	12.90 ± 1.92	39.01 ± 6.76	1 924.33 ± 456.65	50.75 ± 21.01	2 177.35 ± 336.78	4.85 ± 1.39	11.53 ± 1.83	4.88 ± 1.53	201.13 ± 36.25	3.48 ± 2.24	209.49 ± 38.11	151.05 ± 68.99	17.26 ± 10.19	137.96 ± 39.40
apices	6 h	cold	cry1	1.40 ± 0.51	15.18 ± 4.26	92.38 ± 23.01	53.01 ± 14.77	13.33 ± 5.26	0.78 ± 0.25	46.02 ± 12.60	0.52 ± 0.08	0.07 ± 0.04	0.43 ± 0.22	20.69 ± 2.90	1.14 ± 0.41	3.58 ± 1.72	0.91 ± 0.51	6.30 ± 0.96	22.33 ± 4.05	5.07 ± 2.55	67.00 ± 14.06	2.38 ± 1.04	22.42 ± 5.37	116.60 ± 22.84	15.25 ± 5.10	193.49 ± 44.39	59.22 ± 16.26	204.73 ± 67.85	6.91 ± 2.13	60.78 ± 25.98	2 046.97 ± 387.34	51.45 ± 11.65	2 334.98 ± 430.98	5.26 ± 2.77	18.04 ± 2.95	9.74 ± 1.39	303.59 ± 62.23	2.93 ± 1.66	316.26 ± 62.12	156.02 ± 38.29	20.55 ± 11.79	169.98 ± 25.71
apices	6 h	cold	cry2	1.67 ± 0.40	19.08 ± 5.23	113.08 ± 25.55	62.02 ± 14.15	16.05 ± 5.87	0.82 ± 0.14	50.96 ± 11.76	0.59 ± 0.12	0.15 ± 0.11	0.52 ± 0.02	22.18 ± 2.03	1.94 ± 0.38	4.02 ± 0.92	0.64 ± 0.19	6.83 ± 0.66	23.49 ± 3.33	4.02 ± 2.63	70.62 ± 7.84	2.45 ± 0.49	27.02 ± 5.97	125.60 ± 16.78	18.81 ± 6.20	224.79 ± 43.31	49.95 ± 16.48	234.81 ± 49.58	15.07 ± 0.97	43.05 ± 2.58	2 140.19 ± 192.80	63.72 ± 10.46	2 458.32 ± 238.44	4.43 ± 3.34	22.54 ± 3.15	11.31 ± 1.67	346.76 ± 97.63	3.25 ± 1.39	361.33 ± 95.54	58.21 ± 10.77	4.28 ± 1.71	242.43 ± 90.17
apices	6 h	cold	phyA	1.39 ± 0.35	13.33 ± 6.09	91.58 ± 22.67	50.49 ± 13.98	14.09 ± 3.44	0.66 ± 0.12	42.93 ± 25.92	0.61 ± 0.20	0.11 ± 0.05	0.57 ± 0.34	18.90 ± 2.12	1.47 ± 0.20	1.98 ± 0.13	0.71 ± 0.12	6.97 ± 2.67	23.34 ± 2.49	5.16 ± 2.18	55.67 ± 14.31	2.20 ± 0.41	21.48 ± 8.97	100.58 ± 38.68	16.22 ± 3.47	189.46 ± 40.23	38.81 ± 10.00	242.17 ± 71.41	11.70 ± 3.68	44.13 ± 8.34	2 120.01 ± 539.42	72.87 ± 24.23	2 435.85 ± 612.79	4.82 ± 1.17	15.88 ± 4.20	10.39 ± 3.50	264.82 ± 60.40	4.18 ± 1.64	279.39 ± 61.18	176.87 ± 32.75	15.65 ± 1.48	143.97 ± 14.65
apices	6 h	cold	phyB	1.11 ± 0.40	11.34 ± 5.47	45.88 ± 8.87	33.69 ± 11.58	8.92 ± 3.23	0.41 ± 0.05	23.87 ± 3.06	0.54 ± 0.26	0.15 ± 0.12	0.48 ± 0.28	16.43 ± 5.89	1.09 ± 0.31	2.52 ± 0.64	1.25 ± 0.90	4.15 ± 1.68	18.70 ± 4.24	3.89 ± 3.37	54.11 ± 20.02	2.51 ± 1.28	16.51 ± 7.39	80.49 ± 21.29	10.42 ± 3.53	118.59 ± 21.20	65.57 ± 23.96	234.12 ± 63.91	12.44 ± 3.78	65.95 ± 25.99	1 758.49 ± 534.58	32.01 ± 12.53	2 109.13 ± 650.44	3.92 ± 3.09	16.70 ± 4.03	9.87 ± 3.43	350.29 ± 110.35	4.65 ± 1.60	364.81 ± 134.67	131.98 ± 67.08	16.28 ± 6.51	162.95 ± 51.04
apices	6 h	cold+low light	WT	1.27 ± 0.45	12.11 ± 7.80	61.58 ± 25.26	49.11 ± 18.17	12.18 ± 3.50	1.28 ± 0.26	43.99 ± 13.00	0.65 ± 0.08	0.14 ± 0.07	0.74 ± 0.16	22.77 ± 4.07	1.84 ± 0.66	6.08 ± 2.06	1.58 ± 0.79	9.45 ± 1.04	36.42 ± 9.54	3.41 ± 0.75	45.63 ± 23.74	2.99 ± 0.86	22.95 ± 5.90	95.70 ± 22.92	15.30 ± 4.02	173.29 ± 19.86	47.20 ± 8.43	166.35 ± 90.87	16.02 ± 1.18	90.86 ± 24.84	1 912.19 ± 384.67	42.05 ± 31.18	2 121.79 ± 848.72	4.74 ± 1.76	17.18 ± 7.39	11.90 ± 2.96	257.94 ± 30.94	7.46 ± 1.77	269.49 ± 107.80	209.89 ± 114.66	30.26 ± 12.10	122.06 ± 28.95
apices	6 h	cold+low light	cry1	1.11 ± 0.41	10.75 ± 2.65	79.47 ± 9.51	43.62 ± 5.15	16.15 ± 3.73	0.60 ± 0.11	34.48 ± 4.79	0.42 ± 0.09	0.21 ± 0.18	0.32 ± 0.08	25.15 ± 5.32	1.10 ± 0.20	3.11 ± 0.65	0.81 ± 0.14	5.30 ± 0.74	23.04 ± 4.30	6.45 ± 2.98	60.59 ± 11.00	2.13 ± 0.70	16.80 ± 3.39	98.18 ± 15.25	17.85 ± 3.78	177.74 ± 23.11	52.50 ± 19.08	165.18 ± 48.82	4.93 ± 2.61	65.24 ± 20.79	1 624.31 ± 167.63	38.20 ± 9.87	1 868.77 ± 223.15	7.50 ± 4.77	16.95 ± 5.30	8.20 ± 1.77	320.12 ± 36.82	2.49 ± 1.40	330.81 ± 39.09	210.78 ± 95.77	24.96 ± 17.78	156.73 ± 28.26
apices	6 h	cold+low light	cry2	0.99 ± 0.41	10.70 ± 1.18	76.04 ± 5.92	39.44 ± 4.71	12.66 ± 2.72	0.57 ± 0.03	32.67 ± 3.09	0.38 ± 0.04	0.06 ± 0.03	0.52 ± 0.29	22.40 ± 2.39	1.44 ± 0.32	2.47 ± 0.61	0.65 ± 0.14	4.74 ± 1.40	23.08 ± 3.34	4.27 ± 1.51	49.85 ± 8.39	1.70 ± 0.32	16.33 ± 2.37	84.99 ± 10.52	14.67 ± 2.40	165.23 ± 8.09	43.66 ± 13.69	187.30 ± 47.71	7.21 ± 4.62	52.73 ± 30.69	1 449.95 ± 107.73	45.42 ± 27.81	1 719.08 ± 144.16	3.24 ± 0.74	14.90 ± 4.35	19.31 ± 9.68	273.50 ± 47.66	8.29 ± 5.85	301.11 ± 47.97	137.10 ± 50.70	9.13 ± 2.74	214.17 ± 125.69
apices	6 h	cold+low light	phyA	0.82 ± 0.23	6.33 ± 1.93	51.20 ± 6.76	26.72 ± 5.00	8.84 ± 1.08	0.44 ± 0.02	20.93 ± 5.86	0.26 ± 0.04	0.11 ± 0.04	0.33 ± 0.05	21.39 ± 2.22	1.87 ± 0.76	3.11 ± 0.30	0.60 ± 0.31	4.09 ± 2.15	24.56 ± 1.07	4.38 ± 1.83	53.38 ± 29.26	1.53 ± 0.46	11.01 ± 2.45	77.42 ± 33.01	11.15 ± 0.49	128.26 ± 10.29	32.75 ± 10.14	249.54 ± 181.80	8.69 ± 2.27	43.93 ± 3.20	1 466.50 ± 358.31	53.32 ± 24.72	1 789.22 ± 463.44	2.83 ± 0.82	13.14 ± 0.76	11.96 ± 3.66	217.14 ± 86.94	4.61 ± 2.09	233.70 ± 81.98	161.03 ± 76.49	42.43 ± 30.69	230.05 ± 119.62
apices	6 h	cold+low light	phyB	0.88 ± 0.43	11.38 ± 7.53	32.42 ± 17.14	18.86 ± 4.66	6.88 ± 2.36	0.35 ± 0.11	19.02 ± 5.83	0.55 ± 0.24	0.11 ± 0.02	0.61 ± 0.24	18.90 ± 5.29	1.08 ± 0.28	3.65 ± 1.14	1.53 ± 0.43	3.43 ± 1.07	20.24 ± 2.18	4.36 ± 3.16	34.12 ± 9.69	2.51 ± 0.76	15.97 ± 8.80	56.79 ± 11.52	8.31 ± 2.40	94.78 ± 25.86	75.33 ± 29.35	154.09 ± 29.50	11.79 ± 4.99	96.12 ± 46.55	1 575.51 ± 336.47	31.35 ± 14.23	1 825.12 ± 197.02	4.30 ± 2.79	18.23 ± 2.16	11.95 ± 5.17	317.89 ± 55.33	4.08 ± 2.72	333.91 ± 33.02	142.36 ± 82.13	21.09 ± 11.56	154.64 ± 52.20
apices	7 d	control	WT	1.67 ± 0.53	30.45 ± 7.17	123.53 ± 24.78	49.50 ± 11.83	15.82 ± 9.05	0.85 ± 0.23	52.98 ± 27.58	0.66 ± 0.22	0.09 ± 0.05	0.65 ± 0.41	17.28 ± 5.70	1.10 ± 0.54	8.37 ± 4.40	1.51 ± 0.70	14.33 ± 4.56	28.80 ± 9.11	2.05 ± 0.61	180.07 ± 129.94	3.28 ± 0.78	46.09 ± 9.21	238.09 ± 104.01	17.77 ± 9.52	220.93 ± 32.49	67.03 ± 24.78	207.02 ± 63.17	23.70 ± 12.64	79.50 ± 46.44	2 794.71 ± 948.39	52.26 ± 27.55	3 103.76 ± 1 048.43	5.39 ± 1.89	17.21 ± 3.68	8.33 ± 2.52	342.87 ± 127.33	3.79 ± 1.95	354.99 ± 54.40	136.82 ± 46.54	36.28 ± 17.22	372.08 ± 154.16
apices	7 d	control	cry1	1.43 ± 0.38	31.77 ± 4.60	112.41 ± 19.54	59.16 ± 11.90	13.69 ± 4.78	0.92 ± 0.11	60.33 ± 11.64	0.57 ± 0.13	0.14 ± 0.07	1.28 ± 0.60	19.55 ± 4.06	1.01 ± 0.26	17.84 ± 5.80	1.91 ± 1.87	17.63 ± 2.78	24.13 ± 6.21	1.97 ± 0.38	138.68 ± 10.25	3.48 ± 1.63	51.26 ± 6.07	216.86 ± 12.55	15.61 ± 4.84	217.23 ± 36.79	83.07 ± 28.36	390.35 ± 120.59	12.27 ± 4.10	84.78 ± 39.26	2 279.47 ± 452.10	54.20 ± 24.62	2 773.67 ± 337.59	5.16 ± 2.26	17.07 ± 2.52	10.33 ± 2.01	413.90 ± 71.38	7.57 ± 2.43	431.79 ± 82.39	155.76 ± 95.68	27.04 ± 23.10	340.90 ± 163.56
apices	7 d	control	cry2	1.57 ± 0.71	31.04 ± 5.34	102.20 ± 9.75	53.17 ± 8.91	13.76 ± 4.52	0.90 ± 0.12	65.54 ± 29.38	0.78 ± 0.33	0.09 ± 0.03	0.78 ± 0.16	17.46 ± 5.28	1.31 ± 0.60	11.21 ± 6.34	2.17 ± 1.67	15.01 ± 4.48	22.32 ± 3.80	1.63 ± 0.28	172.35 ± 67.92	3.83 ± 1.31	47.62 ± 8.95	249.11 ± 61.36	15.98 ± 4.07	196.78 ± 22.29	95.93 ± 29.36	228.06 ± 128.61	13.15 ± 4.90	91.22 ± 27.62	2 136.18 ± 353.15	40.60 ± 16.01	2 515.86 ± 365.58	5.10 ± 1.69	17.48 ± 3.71	10.46 ± 3.81	379.04 ± 90.17	6.68 ± 2.10	396.18 ± 90.00	114.23 ± 45.11	21.22 ± 15.24	354.44 ± 131.85
apices	7 d	control	phyA	1.77 ± 0.59	29.87 ± 4.48	101.76 ± 25.08	47.57 ± 8.57	15.94 ± 6.92	0.83 ± 0.16	65.38 ± 15.39	0.80 ± 0.29	0.14 ± 0.08	1.49 ± 0.50	18.94 ± 7.58	1.22 ± 0.32	13.71 ± 0.23	2.45 ± 1.41	15.20 ± 1.87	25.98 ± 9.70	1.83 ± 0.54	267.71 ± 129.98	4.36 ± 1.12	47.36 ± 4.19	346.80 ± 112.79	17.99 ± 6.66	196.08 ± 48.43	85.86 ± 40.13	258.05 ± 177.26	15.88 ± 10.94	92.31 ± 35.97	2 652.25 ± 846.61	50.42 ± 12.30	3 026.77 ± 815.38	4.50 ± 1.79	19.03 ± 6.89	10.40 ± 3.45	401.39 ± 114.42	6.61 ± 3.74	418.39 ± 120.17	98.46 ± 55.70	13.93 ± 6.37	419.97 ± 40.01
apices	7 d	control	phyB	1.22 ± 0.28	17.03 ± 6.37	84.45 ± 14.81	40.17 ± 6.38	10.95 ± 4.42	0.66 ± 0.18	37.87 ± 18.96	0.54 ± 0.13	0.08 ± 0.03	0.88 ± 0.39	16.67 ± 3.43	0.98 ± 0.13	4.18 ± 0.58	1.15 ± 1.03	7.25 ± 3.27	21.31 ± 4.06	2.40 ± 0.86	49.63 ± 8.39	2.45 ± 1.17	25.70 ± 8.80	91.67 ± 22.45	12.59 ± 4.38	165.00 ± 24.07	119.58 ± 29.74	298.77 ± 75.11	9.20 ± 4.64	85.99 ± 22.76	2 444.83 ± 750.28	53.48 ± 23.91	2 875.63 ± 535.86	6.06 ± 2.53	15.66 ± 4.40	11.63 ± 5.76	434.91 ± 142.61	4.14 ± 2.59	450.09 ± 60.68	97.35 ± 36.57	9.80 ± 3.92	288.78 ± 151.72
apices	7 d	low light	WT	0.97 ± 0.29	1.52 ± 0.54	63.40 ± 8.65	23.94 ± 3.91	10.18 ± 3.15	0.33 ± 0.08	15.72 ± 5.27	0.09 ± 0.05	0.08 ± 0.01	0.25 ± 0.04	62.19 ± 12.68	2.40 ± 0.49	2.99 ± 0.65	0.75 ± 0.13	1.78 ± 1.13	25.97 ± 4.78	4.68 ± 1.08	33.86 ± 4.34	1.80 ± 0.31	3.64 ± 1.67	52.57 ± 5.39	12.91 ± 2.63	180.18 ± 26.65	52.57 ± 10.75	198.22 ± 49.90	8.86 ± 4.40	54.18 ± 6.97	1 429.96 ± 65.13	16.33 ± 4.03	1 729.69 ± 101.88	7.52 ± 2.01	10.71 ± 0.31	13.95 ± 4.92	548.51 ± 92.78	3.91 ± 1.71	566.38 ± 96.68	133.89 ± 86.18	19.45 ± 3.47	182.84 ± 38.24
apices	7 d	low light	cry1	1.37 ± 0.18	4.97 ± 2.57	76.21 ± 12.35	32.22 ± 6.28	10.31 ± 1.12	0.46 ± 0.15	16.43 ± 2.13	0.16 ± 0.06	0.44 ± 0.26	0.41 ± 0.14	43.26 ± 7.33	1.43 ± 0.31	5.35 ± 0.67	0.63 ± 0.25	2.89 ± 0.22	24.21 ± 2.35	5.17 ± 2.16	65.95 ± 9.91	2.45 ± 0.40	8.42 ± 2.72	87.73 ± 11.80	12.20 ± 0.90	181.07 ± 22.52	80.19 ± 21.07	119.12 ± 52.61	6.43 ± 1.34	92.43 ± 22.54	1 227.19 ± 176.06	26.89 ± 11.81	1 475.61 ± 292.26	5.54 ± 3.13	10.93 ± 1.67	9.42 ± 1.12	507.31 ± 98.39	5.25 ± 1.98	521.98 ± 87.57	42.44 ± 20.17	3.15 ± 1.55	195.30 ± 47.89
apices	7 d	low light	cry2	1.24 ± 0.39	2.78 ± 1.24	73.21 ± 2.39	29.51 ± 0.75	14.48 ± 5.80	0.36 ± 0.06	13.38 ± 2.70	0.07 ± 0.04	0.23 ± 0.14	0.43 ± 0.26	53.58 ± 7.67	2.06 ± 0.27	4.85 ± 0.55	0.90 ± 0.35	3.13 ± 1.55	27.26 ± 2.30	5.12 ± 1.19	58.79 ± 8.48	2.37 ± 0.94	6.39 ± 3.01	77.01 ± 9.95	16.90 ± 5.15	188.69 ± 8.04	52.23 ± 20.81	215.13 ± 105.16	9.10 ± 4.32	61.65 ± 25.62	1 385.32 ± 199.52	16.92 ± 6.29	1 691.51 ± 87.21	7.87 ± 1.44	9.93 ± 1.54	12.59 ± 1.64	487.92 ± 92.69	7.10 ± 2.73	507.61 ± 95.96	86.71 ± 37.67	10.06 ± 4.02	200.33 ± 21.28
apices	7 d	low light	phyA	1.05 ± 0.16	1.86 ± 0.20	80.28 ± 8.64	28.64 ± 4.85	14.85 ± 6.70	0.37 ± 0.05	12.38 ± 1.91	0.07 ± 0.02	0.15 ± 0.05	0.16 ± 0.05	67.80 ± 7.33	2.64 ± 0.14	3.74 ± 0.56	0.70 ± 0.13	1.43 ± 0.29	28.50 ± 3.23	5.55 ± 1.00	41.01 ± 2.90	1.90 ± 0.30	3.51 ± 0.35	57.13 ± 4.34	17.87 ± 6.86	210.78 ± 17.89	31.13 ± 10.42	357.74 ± 214.79	13.00 ± 4.03	52.88 ± 7.16	1 371.91 ± 141.04	25.21 ± 17.99	1 821.23 ± 171.46	8.06 ± 1.41	10.92 ± 1.25	10.31 ± 2.25	512.95 ± 70.38	4.80 ± 1.13	528.06 ± 71.44	61.36 ± 47.73	7.86 ± 6.29	190.64 ± 33.52
apices	7 d	low light	phyB	0.94 ± 0.27	1.84 ± 0.75	65.69 ± 20.68	24.73 ± 9.66	8.48 ± 1.28	0.26 ± 0.09	10.72 ± 2.20	0.09 ± 0.02	0.59 ± 0.56	0.26 ± 0.09	53.95 ± 16.86	2.78 ± 0.89	3.48 ± 1.41	0.74 ± 0.24	0.60 ± 0.23	16.17 ± 1.41	3.42 ± 1.57	18.35 ± 3.08	2.27 ± 0.48	2.81 ± 0.97	32.54 ± 5.40	11.52 ± 1.28	163.96 ± 46.20	104.12 ± 17.82	386.83 ± 201.44	8.89 ± 4.98	99.64 ± 26.54	1 336.66 ± 184.71	29.99 ± 17.05	1 932.81 ± 330.91	8.10 ± 1.99	10.72 ± 1.59	6.00 ± 0.39	521.51 ± 123.86	1.83 ± 1.32	529.35 ± 125.27	97.81 ± 71.72	10.99 ± 4.40	169.93 ± 23.61
apices	7 d	cold	WT	1.74 ± 0.92	29.43 ± 8.90	81.22 ± 22.59	53.64 ± 11.00	12.33 ± 6.52	0.81 ± 0.20	75.83 ± 4.39	1.20 ± 0.38	0.18 ± 0.08	0.29 ± 0.10	10.24 ± 2.88	0.73 ± 0.19	1.34 ± 0.50	1.11 ± 0.43	13.62 ± 3.65	26.42 ± 10.89	1.64 ± 0.37	114.82 ± 42.57	3.03 ± 0.90	44.53 ± 10.78	192.00 ± 45.58	13.87 ± 6.48	173.15 ± 30.58	69.07 ± 15.11	368.60 ± 150.49	18.38 ± 7.27	33.45 ± 11.79	2 125.47 ± 669.43	355.79 ± 156.45	2 462.80 ± 492.56	2.50 ± 1.35	15.24 ± 4.71	16.63 ± 4.56	388.11 ± 54.13	7.41 ± 4.02	315.12 ± 58.42	278.43 ± 36.52	116.13 ± 46.45	520.99 ± 130.11
apices	7 d	cold	cry1	1.73 ± 0.52	22.30 ± 11.20	135.40 ± 29.72	74.68 ± 16.86	23.06 ± 6.96	1.16 ± 0.37	75.99 ± 24.42	0.95 ± 0.42	0.10 ± 0.04	0.38 ± 0.23	13.14 ± 5.46	0.58 ± 0.20	2.81 ± 1.58	1.55 ± 0.57	11.71 ± 5.34	20.60 ± 3.08	2.37 ± 0.50	139.31 ± 24.77	3.38 ± 0.89	35.34 ± 16.88	218.11 ± 48.09	24.79 ± 6.98	246.19 ± 40.32	54.50 ± 11.36	320.16 ± 63.95	26.22 ± 7.55	55.51 ± 17.08	2 003.55 ± 610.52	288.50 ± 129.44	2 423.00 ± 574.21	3.76 ± 0.77	31.55 ± 6.26	30.59 ± 15.87	442.27 ± 148.51	7.55 ± 4.95	471.78 ± 129.85	341.87 ± 146.53	113.87 ± 53.07	629.52 ± 88.02
apices	7 d	cold	cry2	1.36 ± 0.37	28.02 ± 5.23	106.00 ± 0.79	52.23 ± 0.81	17.68 ± 4.35	1.22 ± 0.19	77.25 ± 7.22	0.94 ± 0.45	0.05 ± 0.02	0.33 ± 0.05	15.91 ± 1.86	1.26 ± 0.37	1.69 ± 0.42	1.02 ± 0.29	15.68 ± 2.68	24.10 ± 0.01	2.31 ± 0.41	142.76 ± 1.07	2.43 ± 0.07	44.96 ± 8.42	221.71 ± 6.57	20.15 ± 3.79	200.54 ± 0.17	27.37 ± 10.16	134.79 ± 18.43	14.53 ± 5.64	24.00 ± 11.53	1 304.89 ± 347.66	224.06 ± 127.51	1 540.10 ± 231.56	3.49 ± 1.02	5.27 ± 1.34	44.90 ± 0.10	417.67 ± 9.03	10.07 ± 4.61	472.65 ± 94.53	96.15 ± 28.61	131.53 ± 52.61	509.04 ± 124.47
apices	7 d	cold	phyA	2.31 ± 0.97	34.54 ± 19.01	110.03 ± 26.13	55.70 ± 13.72	21.92 ± 11.61	1.23 ± 0.25	70.62 ± 28.76	0.75 ± 0.48	0.10 ± 0.08	0.23 ± 0.12	14.32 ± 1.28	1.65 ± 0.49	1.53 ± 0.67	0.84 ± 0.41	15.36 ± 5.46	26.46 ± 5.07	2.18 ± 0.63	156.03 ± 30.72	3.25 ± 1.36	50.89 ± 24.35	228.19 ± 46.34	24.79 ± 11.41	208.69 ± 41.81	47.09 ± 13.81	371.43 ± 268.99	34.38 ± 15.74	44.90 ± 27.57	2 127.19 ± 842.45	303.94 ± 127.67	2 638.52 ± 1 077.65	2.05 ± 0.59	25.31 ± 3.73	36.70 ± 19.20	394.31 ± 52.01	16.04 ± 9.33	447.05 ± 44.43	442.10 ± 137.30	193.71 ± 169.76	400.76 ± 94.66
apices	7 d	cold	phyB	1.24 ± 0.91	9.60 ± 6.17	76.82 ± 13.14	37.14 ± 7.03	14.39 ± 6.24	0.55 ± 0.04	35.64 ± 23.04	0.42 ± 0.15	0.33 ± 0.23	0.27 ± 0.03	16.10 ± 2.50	1.36 ± 0.62	1.83 ± 0.66	1.45 ± 0.08	7.45 ± 0.67	22.67 ± 1.94	3.08 ± 0.61	118.27 ± 1.88	3.02 ± 0.59	17.74 ± 6.96	155.74 ± 24.27	16.29 ± 6.90	155.81 ± 25.22	47.61 ± 25.71	913.41 ± 363.20	21.02 ± 6.85	62.97 ± 16.48	1 978.67 ± 154.81	189.88 ± 47.87	3 002.60 ± 218.05	5.81 ± 1.22	26.89 ± 6.20	24.23 ± 5.10	464.63 ± 54.82	5.78 ± 1.49	494.64 ± 51.21	678.45 ± 258.59	244.17 ± 166.19	530.44 ± 197.75
apices	7 d	cold+low light	WT	1.72 ± 0.46	5.29 ± 1.26	76.49 ± 15.08	40.27 ± 8.87	11.11 ± 2.11	0.75 ± 0.01	29.73 ± 16.77	0.32 ± 0.09	0.43 ± 0.24	0.50 ± 0.28	8.35 ± 4.15	0.61 ± 0.21	2.04 ± 0.98	3.71 ± 1.50	2.46 ± 0.52	12.31 ± 2.88	2.62 ± 0.23	64.73 ± 43.83	5.86 ± 1.68	8.56 ± 1.30	96.50 ± 61.29	12.47 ± 2.11	140.04 ± 28.59	73.42 ± 32.61	311.59 ± 127.66	12.31 ± 4.85	118.74 ± 26.99	2 809.54 ± 1 020.47	31.81 ± 7.70	3 168.04 ± 1 201.59	1.42 ± 0.65	22.21 ± 4.09	16.54 ± 0.43	363.39 ± 79.40	6.77 ± 4.67	314.50 ± 85.99	426.61 ± 243.67	108.11 ± 82.14	246.00 ± 70.32
apices	7 d	cold+low light	cry1	0.99 ± 0.43	5.23 ± 1.96	69.46 ± 16.75	34.69 ± 7.85	10.53 ± 4.08	0.64 ± 0.28	35.91 ± 17.02	0.28 ± 0.06	0.32 ± 0.19	0.33 ± 0.12	18.66 ± 3.63	1.05 ± 0.34	2.33 ± 1.62	0.73 ± 0.51	3.99 ± 1.83	22.51 ± 2.38	3.75 ± 1.15	87.01 ± 30.15	2.04 ± 1.05	9.83 ± 3.81	125.25 ± 43.07	12.22 ± 4.33	149.07 ± 25.52	50.90 ± 22.50	249.45 ± 78.20	7.45 ± 3.38	49.56 ± 21.43	1 582.89 ± 364.06	48.72 ± 14.45	1 914.94 ± 439.94	5.69 ± 2.25	35.17 ± 7.22	25.11 ± 7.13	595.98 ± 205.75	10.53 ± 6.50	631.62 ± 210.93	190.68 ± 44.68	51.35 ± 20.54	283.22 ± 58.97
apices	7 d	cold+low light	cry2	1.08 ± 0.71	6.93 ± 1.87	76.40 ± 9.85	36.09 ± 6.82	8.40 ± 3.28	0.63 ± 0.12	55.86 ± 30.13	0.24 ± 0.05	0.34 ± 0.29	0.29 ± 0.08	14.92 ± 5.75	1.16 ± 0.62	3.84 ± 2.63	1.02 ± 0.67	4.41 ± 1.84	20.29 ± 5.34	2.97 ± 0.78	118.34 ± 61.27	2.44 ± 1.61	11.88 ± 3.22	178.03 ± 84.09	10.20 ± 2.89	150.68 ± 13.06	55.34 ± 16.34	284.35 ± 75.74	25.71 ± 17.25	66.86 ± 31.73	1 908.82 ± 750.27	52.23 ± 33.71	2 321.97 ± 828.66	4.48 ± 1.36	29.34 ± 7.33	35.35 ± 20.70	462.37 ± 104.36	18.62 ± 13.86	516.33 ± 130.87	437.97 ± 125.00	191.66 ± 76.67	288.19 ± 63.92
apices	7 d	cold+low light	phyA	0.89 ± 0.46	6.89 ± 1.10	66.43 ± 11.95	32.12 ± 5.15	7.90 ± 1.53	0.50 ± 0.08	31.62 ± 14.66	0.29 ± 0.04	0.33 ± 0.29	0.42 ± 0.14	17.78 ± 7.08	1.59 ± 0.64	1.59 ± 0.39	0.44 ± 0.08	3.01 ± 1.18	23.50 ± 6.29	3.04 ± 0.93	62.85 ± 17.34	1.66 ± 0.72	10.61 ± 2.01	96.06 ± 25.73	9.98 ± 1.42	142.86 ± 23.13	40.35 ± 16.83	420.65 ± 154.23	17.75 ± 3.74	83.48 ± 30.86	2 032.53 ± 490.53	42.78 ± 12.03	2 587.11 ± 607.79	5.03 ± 1.36	31.14 ± 10.92	30.72 ± 13.49	458.15 ± 100.07	14.98 ± 11.96	503.84 ± 124.80	391.25 ± 64.35	136.60 ± 67.19	259.86 ± 45.64
apices	7 d	cold+low light	phyB	0.96 ± 0.80	4.30 ± 0.84	51.85 ± 11.02	24.79 ± 5.90	6.29 ± 2.99	0.35 ± 0.18	50.31 ± 33.64	0.25 ± 0.07	0.60 ± 0.57	0.29 ± 0.06	15.48 ± 5.53	1.37 ± 0.63	5.50 ± 4.37	1.62 ± 1.61	3.13 ± 1.27	17.20 ± 3.89	3.13 ± 0.58	155.08 ± 94.13	3.18 ± 2.43	7.97 ± 1.91	210.88 ± 115.41	8.01 ± 3.01	112.45 ± 13.48	52.48 ± 19.47	297.95 ± 122.45	7.64 ± 3.23	74.93 ± 14.19	1 589.83 ± 81.27	38.17 ± 16.89	2 056.28 ± 411.26	4.52 ± 1.73	35.50 ± 9.62	23.05 ± 11.06	557.77 ± 151.47	12.75 ± 6.44	593.56 ± 165.07	304.07 ± 80.28	155.48 ± 73.84	252.52 ± 62.34
leaves	30 min	control	WT	0.39 ± 0.12	3.84 ± 0.74	49.24 ± 7.72	19.86 ± 4.15	5.43 ± 1.94	0.52 ± 0.08	13.93 ± 4.13	0.14 ± 0.03	0.08 ± 0.03	0.68 ± 0.12	16.10 ± 2.02	1.75 ± 0.62	3.40 ± 1.32	0.23 ± 0.08	1.21 ± 0.41	21.28 ± 0.87	2.28 ± 0.64	10.38 ± 1.93	0.70 ± 0.11	5.86 ± 0.88	27.71 ± 4.58	7.70 ± 1.74	108.76 ± 12.24	78.08 ± 23.82	94.09 ± 36.83	16.22 ± 7.83	21.86 ± 11.10	477.27 ± 77.50	68.45 ± 28.33	619.64 ± 419.24	1.87 ± 0.85	6.81 ± 1.31	42.84 ± 14.93	47.38 ± 13.96	26.77 ± 8.87	110.73 ± 7.57	40.68 ± 13.74	1.90 ± 0.76	84.49 ± 16.32
leaves	30 min	control	cry1	0.29 ± 0.09	4.25 ± 1.48	44.23 ± 7.31	20.02 ± 3.78	5.38 ± 0.92	0.45 ± 0.11	15.15 ± 6.12	0.19 ± 0.05	0.07 ± 0.05	0.39 ± 0.14	12.92 ± 2.20	0.79 ± 0.21	2.53 ± 0.65	0.27 ± 0.14	2.12 ± 0.97	16.95 ± 1.48	2.45 ± 0.71	17.22 ± 7.58	0.62 ± 0.23	6.96 ± 2.50	34.91 ± 14.00	6.62 ± 0.93	96.58 ± 11.51	45.08 ± 28.33	58.65 ± 28.44	12.47 ± 4.07	29.25 ± 14.55	493.12 ± 149.01	73.54 ± 44.51	611.71 ± 179.77	1.84 ± 0.94	8.79 ± 3.45	40.75 ± 12.16	80.16 ± 27.29	24.92 ± 4.50	145.83 ± 26.52	58.46 ± 16.28	18.78 ± 7.51	95.27 ± 23.55
leaves	30 min	control	cry2	0.34 ± 0.17	3.97 ± 0.63	48.39 ± 4.67	20.01 ± 2.07	6.38 ± 1.90	0.52 ± 0.08	16.68 ± 6.17	0.18 ± 0.02	0.08 ± 0.04	0.51 ± 0.08	14.19 ± 2.07	1.26 ± 0.22	3.67 ± 1.29	0.22 ± 0.06	1.79 ± 0.50	19.62 ± 3.63	2.62 ± 0.84	15.77 ± 5.58	0.63 ± 0.20	6.45 ± 0.96	36.13 ± 9.49	8.16 ± 1.85	104.82 ± 11.47	38.07 ± 22.98	69.36 ± 25.96	15.01 ± 4.27	19.89 ± 6.30	442.60 ± 132.10	76.64 ± 54.05	559.37 ± 223.75	1.66 ± 0.45	8.67 ± 2.78	33.03 ± 7.70	53.46 ± 11.88	20.11 ± 8.44	97.40 ± 22.34	43.80 ± 22.26	18.04 ± 7.22	78.98 ± 19.90
leaves	30 min	control	phyA	0.24 ± 0.06	4.87 ± 0.93	48.71 ± 7.34	19.46 ± 3.95	6.17 ± 0.91	0.64 ± 0.21	16.79 ± 4.34	0.17 ± 0.03	0.08 ± 0.06	0.43 ± 0.12	13.48 ± 1.44	1.30 ± 0.33	2.51 ± 0.45	0.22 ± 0.09	2.11 ± 0.52	20.02 ± 4.29	2.80 ± 0.67	17.75 ± 2.52	0.53 ± 0.16	7.58 ± 1.42	37.05 ± 6.32	8.12 ± 1.02	104.47 ± 16.27	52.38 ± 26.84	48.17 ± 12.65	17.18 ± 6.10	16.43 ± 6.86	425.08 ± 101.26	40.18 ± 27.38	518.63 ± 207.45	1.45 ± 0.57	8.66 ± 3.46	33.76 ± 13.92	45.60 ± 20.74	22.96 ± 7.57	98.11 ± 24.86	48.90 ± 19.84	13.35 ± 5.34	103.61 ± 40.81
leaves	30 min	control	phyB	0.19 ± 0.06	2.04 ± 0.59	25.64 ± 5.50	9.87 ± 2.33	3.64 ± 0.53	0.29 ± 0.10	6.35 ± 2.11	0.14 ± 0.04	0.09 ± 0.06	0.25 ± 0.12	11.89 ± 1.51	1.12 ± 0.35	1.89 ± 0.62	0.20 ± 0.06	1.13 ± 0.58	11.45 ± 1.23	1.92 ± 0.65	9.41 ± 2.70	0.48 ± 0.08	3.77 ± 1.34	17.65 ± 4.86	5.05 ± 0.74	60.77 ± 7.95	72.73 ± 39.67	109.89 ± 35.80	21.50 ± 6.76	52.73 ± 29.64	1 142.08 ± 394.85	32.86 ± 25.47	1 352.18 ± 437.26	1.83 ± 0.79	14.45 ± 5.03	32.03 ± 9.67	77.18 ± 8.19	26.66 ± 8.35	121.32 ± 18.35	35.85 ± 15.52	5.03 ± 2.01	68.35 ± 21.18
leaves	30 min	low light	WT	0.43 ± 0.18	2.68 ± 1.16	59.55 ± 6.73	24.63 ± 4.65	5.94 ± 1.20	0.65 ± 0.11	11.53 ± 2.49	0.08 ± 0.03	0.26 ± 0.19	0.45 ± 0.17	17.65 ± 1.72	2.00 ± 0.20	4.10 ± 0.52	0.15 ± 0.07	0.76 ± 0.36	22.04 ± 2.95	2.40 ± 0.95	9.53 ± 3.53	0.83 ± 0.32	3.98 ± 1.33	25.16 ± 6.20	8.60 ± 1.11	126.26 ± 8.37	54.98 ± 9.38	134.79 ± 72.20	16.08 ± 6.27	16.73 ± 3.11	418.29 ± 70.59	88.24 ± 18.48	586.36 ± 234.54	0.92 ± 0.31	13.27 ± 5.04	34.16 ± 8.73	48.64 ± 17.70	19.31 ± 4.35	102.10 ± 5.70	26.32 ± 8.20	2.49 ± 0.99	62.32 ± 10.44
leaves	30 min	low light	cry1	0.23 ± 0.10	3.10 ± 1.75	55.85 ± 4.78	25.60 ± 4.23	6.11 ± 0.87	0.58 ± 0.09	10.07 ± 2.12	0.10 ± 0.03	0.22 ± 0.17	0.36 ± 0.14	16.19 ± 1.74	1.13 ± 0.21	3.65 ± 1.27	0.18 ± 0.05	1.04 ± 0.62	19.92 ± 1.59	2.18 ± 0.77	10.43 ± 4.23	0.63 ± 0.29	4.61 ± 2.23	24.15 ± 7.13	7.81 ± 0.78	119.74 ± 10.10	63.71 ± 8.72	175.31 ± 53.90	7.85 ± 4.67	29.73 ± 5.10	535.94 ± 88.66	203.05 ± 90.69	750.78 ± 605.34	1.80 ± 0.71	7.54 ± 1.18	57.94 ± 11.00	74.26 ± 23.65	32.31 ± 2.90	164.50 ± 20.83	60.49 ± 25.61	6.83 ± 2.73	105.77 ± 17.33
leaves	30 min	low light	cry2	0.44 ± 0.29	3.60 ± 1.07	55.46 ± 5.43	23.54 ± 3.86	6.30 ± 0.60	0.67 ± 0.08	12.28 ± 2.68	0.16 ± 0.09	0.25 ± 0.18	0.37 ± 0.13	16.82 ± 1.09	1.74 ± 0.26	4.52 ± 0.08	0.23 ± 0.10	1.08 ± 0.29	21.38 ± 1.46	2.07 ± 0.28	12.17 ± 4.28	0.92 ± 0.47	5.21 ± 1.24	28.97 ± 3.77	8.71 ± 0.45	119.27 ± 9.11	49.84 ± 11.52	211.14 ± 109.91	14.33 ± 7.71	22.97 ± 4.79	528.68 ± 96.23	96.33 ± 62.17	777.73 ± 447.14	1.45 ± 0.70	8.41 ± 0.49	49.77 ± 13.99	55.88 ± 18.91	24.23 ± 5.40	125.85 ± 15.46	42.83 ± 15.63	3.85 ± 1.54	95.28 ± 25.41
leaves	30 min	low light	phyA	0.38 ± 0.19	4.40 ± 1.61	45.10 ± 8.47	19.08 ± 3.72	5.13 ± 1.05	0.51 ± 0.11	12.88 ± 2.67	0.17 ± 0.05	0.17 ± 0.10	0.47 ± 0.31	13.87 ± 2.62	1.24 ± 0.26	2.94 ± 0.70	0.23 ± 0.07	1.56 ± 0.37	19.10 ± 3.24	2.03 ± 0.67	18.28 ± 4.50	0.78 ± 0.34	6.60 ± 2.12	34.11 ± 7.33	6.88 ± 1.00	99.18 ± 17.85	50.73 ± 23.18	120.20 ± 51.99	14.13 ± 7.82	15.93 ± 5.01	460.71 ± 114.94	64.20 ± 17.00	613.17 ± 450.81	1.04 ± 0.71	8.20 ± 2.40	29.32 ± 6.68	45.83 ± 16.11	17.97 ± 3.84	93.12 ± 12.19	167.08 ± 39.55	29.06 ± 11.62	103.25 ± 39.21
leaves	30 min	low light	phyB	0.23 ± 0.09	1.27 ± 0.50	27.68 ± 3.08	10.57 ± 1.92	3.77 ± 0.60	0.28 ± 0.05	6.08 ± 2.66	0.14 ± 0.04	0.15 ± 0.11	0.18 ± 0.05	15.21 ± 2.64	1.12 ± 0.23	2.35 ± 0.69	0.24 ± 0.08	0.61 ± 0.25	13.42 ± 1.64	2.04 ± 0.74	8.13 ± 0.95	0.62 ± 0.19	2.21 ± 0.73	16.56 ± 2.49	5.17 ± 0.48	68.91 ± 7.64	74.01 ± 13.76	203.82 ± 77.36	16.62 ± 8.19	46.21 ± 9.30	1 714.40 ± 218.74	50.16 ± 26.82	1 986.57 ± 836.74	3.31 ± 1.36	12.90 ± 4.79	49.11 ± 4.53	123.90 ± 41.60	27.11 ± 4.89	200.12 ± 89.54	22.62 ± 6.98	0.69 ± 0.28	99.70 ± 14.18
leaves	30 min	cold	WT	0.20 ± 0.06	3.94 ± 1.12	41.10 ± 11.21	16.11 ± 4.61	5.39 ± 1.97	0.56 ± 0.09	12.74 ± 2.81	0.19 ± 0.03	0.09 ± 0.03	0.62 ± 0.11	13.85 ± 2.45	1.61 ± 0.31	3.00 ± 1.50	0.19 ± 0.02	2.33 ± 0.87	17.85 ± 4.28	2.16 ± 0.39	13.51 ± 3.15	0.48 ± 0.08	7.07 ± 2.06	29.25 ± 5.45	7.57 ± 2.12	91.08 ± 20.78	31.47 ± 9.63	49.00 ± 21.04	13.47 ± 1.60	12.44 ± 5.03	389.17 ± 151.22	70.82 ± 22.27	469.77 ± 67.07	1.51 ± 0.70	5.88 ± 2.82	14.21 ± 9.32	43.83 ± 10.30	9.76 ± 4.93	67.80 ± 7.22	35.84 ± 34.80	0.61 ± 0.24	50.15 ± 16.47
leaves	30 min	cold	cry1	0.48 ± 0.22	4.14 ± 0.77	51.78 ± 4.16	23.10 ± 3.21	5.92 ± 1.16	0.52 ± 0.12	15.51 ± 1.82	0.16 ± 0.04	0.22 ± 0.18	0.26 ± 0.07	17.03 ± 1.93	0.97 ± 0.14	2.86 ± 0.48	0.26 ± 0.04	2.46 ± 0.77	19.77 ± 1.65	2.39 ± 0.58	28.17 ± 4.10	0.96 ± 0.38	7.02 ± 1.53	46.54 ± 5.23	7.41 ± 1.17	114.07 ± 9.38	86.75 ± 15.47	107.59 ± 83.08	9.33 ± 3.15	21.56 ± 2.18	743.38 ± 130.22	64.06 ± 29.79	888.41 ± 479.56	2.04 ± 1.02	11.80 ± 1.79	41.47 ± 4.99	106.89 ± 29.06	22.12 ± 4.15	170.48 ± 28.05	36.59 ± 16.21	3.68 ± 1.47	128.80 ± 44.47
leaves	30 min	cold	cry2	0.44 ± 0.23	5.06 ± 1.95	58.56 ± 9.03	23.86 ± 4.92	6.18 ± 0.64	0.71 ± 0.18	18.45 ± 7.52	0.14 ± 0.03	0.21 ± 0.13	0.36 ± 0.15	16.79 ± 2.20	1.71 ± 0.66	3.46 ± 0.82	0.17 ± 0.05	2.41 ± 0.72	20.99 ± 3.89	2.43 ± 0.89	26.24 ± 8.21	0.82 ± 0.47	7.97 ± 2.55	48.14 ± 15.66	8.59 ± 1.29	122.63 ± 16.77	47.86 ± 7.24	82.81 ± 62.44	13.74 ± 7.55	12.50 ± 1.39	561.27 ± 139.76	79.09 ± 24.47	677.10 ± 270.84	1.14 ± 0.39	10.26 ± 1.86	32.20 ± 6.99	55.36 ± 16.32	17.66 ± 3.33	105.21 ± 33.12	49.06 ± 35.29	7.71 ± 3.09	84.13 ± 25.35
leaves	30 min	cold	phyA	0.37 ± 0.15	4.80 ± 1.55	55.15 ± 7.09	22.37 ± 3.32	6.53 ± 1.53	0.71 ± 0.15	16.41 ± 3.42	0.18 ± 0.08	0.22 ± 0.21	0.50 ± 0.16	15.86 ± 1.56	1.60 ± 0.22	4.90 ± 1.87	0.21 ± 0.07	2.58 ± 0.88	19.86 ± 1.66	2.55 ± 0.89	24.15 ± 9.35	0.80 ± 0.29	8.06 ± 2.32	45.46 ± 9.65	8.84 ± 1.52	115.79 ± 10.14	42.60 ± 9.35	127.92 ± 77.63	14.71 ± 6.44	13.42 ± 4.14	510.43 ± 128.05	76.11 ± 19.93	673.22 ± 45.64	1.31 ± 0.64	8.37 ± 2.84	25.94 ± 10.94	49.38 ± 12.23	16.90 ± 6.76	92.21 ± 18.44	36.82 ± 24.56	3.96 ± 1.58	85.40 ± 30.60
leaves	30 min	cold	phyB	0.26 ± 0.15	2.62 ± 1.23	26.65 ± 1.26	10.42 ± 1.53	3.57 ± 0.38	0.37 ± 0.15	10.80 ± 3.30	0.13 ± 0.02	0.19 ± 0.11	0.35 ± 0.15	13.07 ± 1.58	1.30 ± 0.42	3.20 ± 1.75	0.25 ± 0.07	1.42 ± 0.55	12.92 ± 1.06	1.71 ± 0.58	14.16 ± 2.11	0.70 ± 0.37	4.52 ± 1.69	28.16 ± 3.64	5.24 ± 0.72	64.77 ± 3.88	112.21 ± 45.85	153.48 ± 79.45	16.43 ± 5.38	38.33 ± 12.21	1 653.61 ± 503.82	88.09 ± 58.67	1 890.95 ± 378.19	1.67 ± 1.28	9.75 ± 3.02	25.61 ± 9.01	95.35 ± 41.01	15.79 ± 3.69	136.75 ± 9.11	44.61 ± 31.30	9.51 ± 3.80	73.51 ± 26.86
leaves	30 min	cold+low light	WT	0.50 ± 0.31	5.12 ± 1.43	36.81 ± 12.50	17.45 ± 2.46	5.62 ± 0.69	0.59 ± 0.08	21.04 ± 5.54	0.14 ± 0.03	0.16 ± 0.09	0.76 ± 0.13	13.56 ± 0.53	1.27 ± 0.18	5.26 ± 0.91	0.18 ± 0.02	1.68 ± 0.47	17.76 ± 2.31	2.06 ± 0.53	16.77 ± 0.69	0.84 ± 0.39	7.65 ± 1.94	43.07 ± 4.52	7.48 ± 0.69	87.64 ± 13.52	48.90 ± 18.63	51.96 ± 15.19	15.50 ± 3.79	14.55 ± 4.15	547.53 ± 89.34	47.55 ± 15.47	630.18 ± 313.42	2.03 ± 0.85	5.46 ± 1.38	25.80 ± 3.91	46.31 ± 7.76	13.77 ± 3.14	72.69 ± 14.54	24.04 ± 17.95	2.59 ± 1.04	81.60 ± 8.29
leaves	30 min	cold+low light	cry1	0.43 ± 0.23	4.50 ± 1.68	45.65 ± 12.47	20.87 ± 7.07	4.80 ± 0.96	0.52 ± 0.14	15.75 ± 5.12	0.17 ± 0.05	0.26 ± 0.23	0.39 ± 0.11	12.83 ± 3.13	0.88 ± 0.23	4.25 ± 1.31	0.21 ± 0.07	1.62 ± 0.62	16.70 ± 3.37	1.84 ± 0.38	15.63 ± 3.47	0.90 ± 0.52	6.68 ± 2.45	35.63 ± 8.83	6.20 ± 1.29	97.89 ± 25.21	60.05 ± 30.99	144.82 ± 104.94	3.40 ± 1.52	25.69 ± 7.64	586.51 ± 156.07	59.84 ± 38.09	766.17 ± 261.09	1.05 ± 0.35	6.34 ± 2.16	45.84 ± 17.08	59.25 ± 17.17	25.42 ± 9.57	130.51 ± 15.84	8.94 ± 1.63	0.95 ± 0.38	102.69 ± 36.96
leaves	30 min	cold+low light	cry2	0.40 ± 0.21	5.66 ± 0.75	56.67 ± 6.20	23.45 ± 4.35	6.42 ± 0.86	0.66 ± 0.07	16.51 ± 2.27	0.22 ± 0.03	0.20 ± 0.14	0.52 ± 0.19	15.63 ± 1.26	1.30 ± 0.27	4.56 ± 1.34	0.24 ± 0.07	1.70 ± 0.41	20.08 ± 2.05	2.13 ± 0.32	16.22 ± 3.07	0.84 ± 0.40	8.10 ± 0.99	37.29 ± 4.06	8.37 ± 0.61	117.96 ± 13.35	64.10 ± 17.40	158.28 ± 53.61	10.83 ± 4.94	14.93 ± 3.19	618.08 ± 77.84	54.45 ± 37.67	810.27 ± 265.90	1.97 ± 1.61	9.08 ± 1.73	34.59 ± 7.84	62.04 ± 10.15	19.96 ± 3.28	116.59 ± 40.44	12.11 ± 3.69	0.90 ± 0.36	96.78 ± 26.98
leaves	30 min	cold+low light	phyA	0.30 ± 0.19	3.26 ± 0.69	48.80 ± 7.62	20.17 ± 4.90	5.01 ± 0.89	0.61 ± 0.13	11.13 ± 1.94	0.16 ± 0.03	0.21 ± 0.17	0.56 ± 0.17	16.24 ± 1.39	1.81 ± 0.30	6.43 ± 1.88	0.30 ± 0.03	2.00 ± 0.75	22.87 ± 3.44	2.26 ± 0.60	21.78 ± 4.96	0.80 ± 0.35	5.97 ± 1.26	39.34 ± 4.55	7.43 ± 1.13	110.33 ± 9.45	51.33 ± 9.67	157.85 ± 84.83	10.23 ± 5.13	15.45 ± 2.69	563.36 ± 77.85	25.14 ± 7.45	754.06 ± 301.63	0.89 ± 0.34	8.00 ± 1.64	30.05 ± 13.70	71.45 ± 23.54	18.26 ± 5.22	119.75 ± 60.31	12.17 ± 3.94	0.69 ± 0.28	101.93 ± 32.96
leaves	30 min	cold+low light	phyB	0.28 ± 0.14	1.67 ± 0.45	26.93 ± 2.82	10.83 ± 1.43	2.94 ± 0.49	0.31 ± 0.14	5.65 ± 1.29	0.16 ± 0.04	0.35 ± 0.28	0.37 ± 0.11	16.27 ± 1.81	1.46 ± 0.21	3.79 ± 0.83	0.31 ± 0.11	0.74 ± 0.21	12.86 ± 1.78	1.58 ± 0.68	8.29 ± 0.84	0.94 ± 0.51	2.94 ± 0.71	17.73 ± 1.88	4.71 ± 0.53	68.48 ± 6.55	73.51 ± 18.51	225.47 ± 150.84	11.63 ± 5.97	40.68 ± 6.27	1 584.49 ± 287.56	31.97 ± 16.63	1 876.71 ± 195.11	1.90 ± 0.85	11.56 ± 4.05	42.30 ± 10.22	121.32 ± 30.31	22.81 ± 7.69	186.43 ± 49.08	19.28 ± 11.52	1.05 ± 0.42	118.83 ± 69.05
leaves	6 h	control	WT	0.76 ± 0.16	10.34 ± 2.68	60.74 ± 12.67	26.36 ± 4.14	8.71 ± 2.97	0.90 ± 0.11	28.52 ± 5.79	0.24 ± 0.09	0.14 ± 0.07	0.22 ± 0.11	20.54 ± 1.94	2.71 ± 0.50	1.24 ± 0.52	0.25 ± 0.04	6.81 ± 1.60	23.41 ± 3.70	3.42 ± 0.65	70.34 ± 9.51	1.15 ± 0.21	17.62 ± 3.96	100.10 ± 13.06	12.32 ± 2.75	134.48 ± 20.37	24.73 ± 8.82	81.08 ± 40.36	19.68 ± 9.45	11.23 ± 1.60	502.67 ± 109.97	36.02 ± 24.20	619.80 ± 68.42	1.68 ± 0.27	18.35 ± 2.79	38.75 ± 8.12	58.16 ± 10.60	20.63 ± 2.30	117.54 ± 9.29	55.99 ± 12.71	40.61 ± 16.24	80.82 ± 16.48
leaves	6 h	control	cry1	0.58 ± 0.10	10.49 ± 2.61	53.49 ± 8.11	23.23 ± 3.23	5.33 ± 1.48	0.54 ± 0.13	27.47 ± 5.19	0.26 ± 0.10	0.11 ± 0.08	0.21 ± 0.07	18.72 ± 2.41	1.28 ± 0.52	1.33 ± 0.90	0.28 ± 0.06	8.76 ± 1.89	19.38 ± 2.10	2.98 ± 0.92	74.09 ± 6.64	0.97 ± 0.04	19.73 ± 3.94	102.90 ± 10.79	7.16 ± 1.02	117.80 ± 9.93	28.15 ± 10.41	101.97 ± 61.65	9.42 ± 4.79	18.36 ± 5.72	662.09 ± 96.71	28.80 ± 18.31	810.21 ± 411.63	1.79 ± 0.58	21.07 ± 3.91	47.45 ± 9.20	94.39 ± 28.10	25.39 ± 4.41	158.12 ± 31.62	69.04 ± 25.90	132.40 ± 95.04	124.68 ± 21.66
leaves	6 h	control	cry2	0.72 ± 0.21	11.71 ± 3.25	57.47 ± 9.96	20.32 ± 6.40	6.34 ± 2.10	0.75 ± 0.19	25.55 ± 6.86	0.30 ± 0.09	0.07 ± 0.03	0.25 ± 0.06	17.63 ± 3.11	2.04 ± 0.67	1.15 ± 0.67	0.25 ± 0.07	8.42 ± 0.95	21.67 ± 2.66	3.66 ± 0.85	77.20 ± 17.70	1.04 ± 0.19	20.68 ± 4.08	103.90 ± 16.87	9.14 ± 1.92	120.75 ± 18.97	23.62 ± 4.87	82.01 ± 45.49	14.81 ± 5.45	12.00 ± 2.20	490.11 ± 128.63	40.94 ± 30.75	610.95 ± 289.68	1.75 ± 0.56	15.20 ± 2.41	33.22 ± 10.54	64.62 ± 24.62	17.93 ± 6.39	111.61 ± 9.00	60.09 ± 18.29	128.93 ± 51.57	105.59 ± 31.05
leaves	6 h	control	phyA	0.63 ± 0.13	11.75 ± 4.82	48.98 ± 8.15	19.90 ± 3.08	5.59 ± 1.34	0.78 ± 0.17	24.62 ± 7.24	0.32 ± 0.12	0.11 ± 0.07	0.24 ± 0.10	17.18 ± 1.41	1.99 ± 0.85	1.42 ± 0.83	0.29 ± 0.06	9.07 ± 2.98	22.64 ± 3.30	3.66 ± 1.41	77.27 ± 15.50	1.03 ± 0.26	21.39 ± 6.92	103.31 ± 19.94	8.37 ± 0.81	112.36 ± 9.81	26.93 ± 8.76	90.97 ± 34.33	13.30 ± 7.96	9.95 ± 3.80	568.22 ± 59.83	32.07 ± 22.99	689.06 ± 412.30	1.95 ± 0.77	21.07 ± 2.22	40.02 ± 4.45	57.33 ± 18.28	22.90 ± 3.28	120.26 ± 7.83	60.43 ± 22.79	127.68 ± 51.07	122.34 ± 22.83
leaves	6 h	control	phyB	0.45 ± 0.11	4.58 ± 2.98	28.21 ± 4.88	11.24 ± 3.37	3.08 ± 0.57	0.36 ± 0.16	11.44 ± 2.28	0.19 ± 0.11	0.04 ± 0.02	0.14 ± 0.06	15.23 ± 1.54	1.62 ± 0.59	0.83 ± 0.26	0.26 ± 0.06	3.47 ± 1.23	12.59 ± 2.51	3.18 ± 1.08	42.05 ± 10.20	0.75 ± 0.13	8.39 ± 4.03	54.32 ± 12.02	5.06 ± 0.53	70.45 ± 10.32	51.61 ± 23.24	183.06 ± 91.30	14.30 ± 7.24	26.43 ± 7.67	1 454.00 ± 472.69	32.43 ± 25.56	1 707.31 ± 193.15	1.85 ± 0.90	24.16 ± 4.87	43.85 ± 11.58	94.45 ± 33.37	26.66 ± 6.58	153.15 ± 10.22	45.49 ± 18.19	81.75 ± 32.70	130.04 ± 50.32
leaves	6 h	low light	WT	0.39 ± 0.09	2.19 ± 0.60	59.45 ± 3.30	22.98 ± 2.38	6.80 ± 0.37	0.60 ± 0.14	12.24 ± 3.04	0.11 ± 0.02	0.14 ± 0.03	1.10 ± 0.34	19.62 ± 2.21	2.73 ± 0.47	7.32 ± 1.98	0.17 ± 0.03	0.95 ± 0.13	20.27 ± 1.24	3.53 ± 0.34	13.34 ± 2.59	0.71 ± 0.11	4.35 ± 0.88	32.90 ± 4.61	10.14 ± 0.65	125.85 ± 5.81	29.21 ± 8.41	77.71 ± 18.93	18.45 ± 6.12	12.50 ± 1.97	591.60 ± 128.27	76.18 ± 28.12	711.28 ± 142.92	1.29 ± 0.59	14.47 ± 0.95	31.76 ± 5.67	64.49 ± 25.94	19.59 ± 2.95	115.84 ± 7.50	43.23 ± 26.33	19.99 ± 8.00	83.18 ± 36.08
leaves	6 h	low light	cry1	0.29 ± 0.04	2.56 ± 0.52	50.36 ± 8.51	20.99 ± 4.08	5.01 ± 0.69	0.58 ± 0.15	10.96 ± 3.41	0.12 ± 0.02	0.12 ± 0.02	0.94 ± 0.17	18.66 ± 2.02	1.48 ± 0.27	6.37 ± 0.65	0.19 ± 0.05	1.16 ± 0.24	18.50 ± 1.46	2.92 ± 0.93	12.53 ± 0.92	0.60 ± 0.09	4.78 ± 0.83	29.86 ± 3.01	7.08 ± 0.86	111.44 ± 14.33	25.16 ± 2.39	127.84 ± 49.17	7.21 ± 2.01	23.86 ± 5.76	686.31 ± 46.72	70.26 ± 31.60	870.79 ± 348.32	2.15 ± 0.59	16.57 ± 2.44	50.77 ± 6.42	81.05 ± 16.41	26.80 ± 3.26	158.62 ± 24.13	20.55 ± 12.49	3.45 ± 1.38	93.58 ± 11.93
leaves	6 h	low light	cry2	0.30 ± 0.04	3.03 ± 0.91	57.72 ± 5.82	22.24 ± 2.87	7.17 ± 0.75	0.74 ± 0.09	12.79 ± 5.13	0.18 ± 0.05	0.16 ± 0.02	1.16 ± 0.16	19.65 ± 2.98	2.84 ± 0.42	8.06 ± 0.90	0.16 ± 0.06	1.32 ± 0.34	22.10 ± 1.69	2.70 ± 0.59	14.73 ± 1.30	0.61 ± 0.09	5.69 ± 1.19	35.58 ± 5.21	10.75 ± 0.99	124.41 ± 12.84	20.95 ± 5.16	101.02 ± 29.90	12.80 ± 4.84	13.55 ± 2.58	617.57 ± 157.40	67.74 ± 31.04	758.07 ± 303.23	1.60 ± 0.92	18.75 ± 4.42	45.78 ± 9.06	56.29 ± 13.71	24.34 ± 4.25	126.42 ± 15.12	70.76 ± 17.89	24.41 ± 9.77	91.92 ± 19.71
leaves	6 h	low light	phyA	0.40 ± 0.06	2.91 ± 0.48	59.54 ± 6.09	23.82 ± 2.61	7.06 ± 0.82	0.65 ± 0.10	11.62 ± 2.68	0.16 ± 0.02	0.19 ± 0.03	1.27 ± 0.28	20.26 ± 2.02	2.64 ± 0.50	8.41 ± 0.87	0.18 ± 0.04	1.41 ± 0.23	22.04 ± 1.40	3.61 ± 0.70	16.02 ± 3.08	0.78 ± 0.08	5.75 ± 0.73	36.05 ± 4.64	10.36 ± 1.11	129.26 ± 10.36	25.95 ± 5.79	57.95 ± 16.06	18.50 ± 5.44	12.80 ± 1.71	565.08 ± 100.55	62.67 ± 16.93	664.47 ± 233.78	1.46 ± 0.63	14.47 ± 1.28	32.28 ± 4.22	62.02 ± 14.05	17.82 ± 3.07	112.12 ± 10.27	64.84 ± 37.03	30.13 ± 12.05	95.35 ± 24.42
leaves	6 h	low light	phyB	0.21 ± 0.07	0.99 ± 0.21	32.50 ± 2.12	11.94 ± 1.17	4.17 ± 0.87	0.34 ± 0.07	4.43 ± 1.56	0.10 ± 0.01	0.12 ± 0.01	0.63 ± 0.18	17.65 ± 1.19	2.15 ± 0.44	4.18 ± 0.71	0.18 ± 0.04	0.54 ± 0.18	15.04 ± 1.31	3.74 ± 0.65	6.86 ± 0.93	0.50 ± 0.11	2.26 ± 0.51	15.47 ± 2.55	6.67 ± 1.31	80.86 ± 4.92	50.95 ± 9.43	213.96 ± 88.72	14.04 ± 3.55	35.58 ± 9.37	1 599.12 ± 616.19	85.33 ± 16.02	1 893.18 ± 736.02	1.77 ± 0.22	20.85 ± 4.09	60.51 ± 13.22	103.73 ± 29.38	34.24 ± 3.33	198.48 ± 22.32	25.20 ± 13.49	3.00 ± 1.20	78.61 ± 17.35
leaves	6 h	cold	WT	0.43 ± 0.09	6.39 ± 1.40	38.39 ± 10.77	23.11 ± 2.64	3.64 ± 1.65	0.59 ± 0.10	21.12 ± 5.82	0.19 ± 0.05	0.05 ± 0.00	0.22 ± 0.06	16.40 ± 3.51	2.31 ± 0.96	1.60 ± 0.40	0.27 ± 0.05	1.68 ± 0.53	20.76 ± 1.03	5.12 ± 0.95	20.62 ± 7.57	0.76 ± 0.07	8.48 ± 1.71	43.35 ± 4.70	6.35 ± 1.46	96.86 ± 12.79	19.67 ± 7.10	54.04 ± 17.30	16.56 ± 3.72	14.67 ± 3.96	509.62 ± 137.04	26.59 ± 11.00	607.48 ± 242.99	1.24 ± 0.35	20.73 ± 5.86	29.90 ± 6.04	46.76 ± 8.67	11.89 ± 3.86	88.55 ± 35.42	65.98 ± 40.74	3.21 ± 1.28	108.55 ± 48.62
leaves	6 h	cold	cry1	0.38 ± 0.06	5.56 ± 1.33	49.63 ± 6.58	21.18 ± 4.19	5.17 ± 0.98	0.68 ± 0.14	16.88 ± 2.81	0.18 ± 0.01	0.06 ± 0.05	0.19 ± 0.05	14.97 ± 2.31	0.96 ± 0.21	1.47 ± 0.20	0.20 ± 0.06	2.89 ± 0.72	19.22 ± 2.73	3.93 ± 1.03	27.70 ± 3.54	0.64 ± 0.12	8.82 ± 1.85	46.05 ± 6.16	6.81 ± 1.20	108.94 ± 13.71	30.48 ± 3.95	65.26 ± 21.74	9.72 ± 3.96	16.85 ± 3.73	696.81 ± 51.00	50.69 ± 9.56	806.76 ± 446.47	1.36 ± 1.06	17.20 ± 2.97	45.76 ± 6.70	67.02 ± 18.54	23.69 ± 3.16	136.47 ± 7.51	51.67 ± 31.81	12.78 ± 5.11	85.35 ± 13.23
leaves	6 h	cold	cry2	0.36 ± 0.04	7.15 ± 2.82	60.87 ± 5.66	23.41 ± 2.29	6.03 ± 0.94	0.70 ± 0.13	23.27 ± 11.37	0.21 ± 0.04	0.09 ± 0.05	0.35 ± 0.07	16.93 ± 1.41	1.90 ± 0.34	3.24 ± 1.07	0.17 ± 0.07	3.29 ± 0.89	20.47 ± 1.59	3.08 ± 0.65	29.32 ± 7.52	0.62 ± 0.12	11.00 ± 3.74	52.92 ± 15.28	8.63 ± 0.85	124.77 ± 9.04	25.32 ± 6.76	75.69 ± 25.98	21.51 ± 8.48	13.08 ± 3.47	606.25 ± 75.67	45.15 ± 15.76	725.76 ± 217.20	1.65 ± 0.85	24.09 ± 4.97	37.09 ± 7.72	68.68 ± 18.56	18.60 ± 4.59	124.37 ± 20.09	38.60 ± 32.42	6.17 ± 2.47	89.55 ± 29.95
leaves	6 h	cold	phyA	0.34 ± 0.08	7.20 ± 2.38	52.74 ± 10.92	21.24 ± 4.39	5.92 ± 1.38	0.64 ± 0.15	21.61 ± 6.63	0.28 ± 0.07	0.05 ± 0.04	0.34 ± 0.07	15.83 ± 2.98	1.42 ± 0.26	2.44 ± 0.71	0.18 ± 0.03	4.01 ± 1.29	22.24 ± 4.94	3.48 ± 1.07	41.09 ± 10.30	0.57 ± 0.10	11.84 ± 3.49	65.14 ± 14.64	7.97 ± 1.74	115.52 ± 22.56	29.82 ± 9.42	62.71 ± 23.56	15.86 ± 6.82	10.47 ± 1.12	632.76 ± 88.62	62.32 ± 29.00	734.49 ± 372.30	1.21 ± 0.79	18.45 ± 5.80	29.64 ± 9.33	53.01 ± 12.08	16.20 ± 5.41	98.84 ± 6.96	34.01 ± 26.41	7.63 ± 3.05	99.70 ± 16.73
leaves	6 h	cold	phyB	0.29 ± 0.08	3.36 ± 2.04	27.66 ± 5.48	13.08 ± 6.20	3.12 ± 0.53	0.34 ± 0.16	9.08 ± 3.67	0.15 ± 0.04	0.05 ± 0.03	0.20 ± 0.06	16.51 ± 3.49	1.56 ± 0.62	1.45 ± 0.28	0.24 ± 0.08	1.40 ± 0.48	14.54 ± 3.28	3.70 ± 1.45	15.80 ± 2.02	0.59 ± 0.13	5.12 ± 2.20	26.33 ± 4.45	5.02 ± 0.87	75.48 ± 17.39	42.41 ± 9.94	183.99 ± 82.35	11.92 ± 4.63	35.97 ± 10.72	1 752.36 ± 599.93	57.43 ± 20.93	2 026.80 ± 465.31	2.47 ± 0.81	17.14 ± 6.38	38.89 ± 7.21	114.13 ± 29.59	18.53 ± 4.29	171.54 ± 24.48	47.18 ± 30.90	7.67 ± 3.07	76.59 ± 13.00
leaves	6 h	cold+low light	WT	0.56 ± 0.11	4.65 ± 1.35	56.67 ± 10.54	22.60 ± 6.86	5.42 ± 0.68	0.45 ± 0.25	17.32 ± 6.71	0.18 ± 0.05	0.07 ± 0.04	0.29 ± 0.05	15.32 ± 2.73	1.41 ± 0.93	2.15 ± 0.71	0.44 ± 0.32	2.69 ± 1.00	26.41 ± 9.29	3.44 ± 1.11	30.18 ± 4.87	1.07 ± 0.42	7.81 ± 2.12	49.65 ± 8.99	7.28 ± 1.36	124.43 ± 18.79	22.64 ± 8.69	74.87 ± 23.64	11.18 ± 7.65	13.31 ± 4.22	542.52 ± 159.44	29.49 ± 19.56	631.89 ± 252.76	1.39 ± 0.71	11.76 ± 2.71	30.37 ± 4.60	52.95 ± 6.99	15.75 ± 5.37	86.83 ± 17.37	43.61 ± 16.72	3.58 ± 1.43	76.46 ± 39.06
leaves	6 h	cold+low light	cry1	0.36 ± 0.17	3.76 ± 0.90	52.55 ± 6.43	23.94 ± 3.51	5.58 ± 1.01	0.48 ± 0.05	17.50 ± 3.76	0.15 ± 0.01	0.03 ± 0.02	0.18 ± 0.03	15.29 ± 1.72	1.02 ± 0.25	2.01 ± 0.52	0.22 ± 0.08	2.16 ± 0.70	17.13 ± 2.28	3.92 ± 1.57	31.00 ± 6.83	0.61 ± 0.25	6.25 ± 0.99	50.52 ± 5.64	7.07 ± 1.10	112.83 ± 9.97	22.52 ± 4.62	118.36 ± 48.33	4.95 ± 2.09	18.09 ± 4.57	757.54 ± 120.89	41.91 ± 26.65	923.86 ± 416.59	2.02 ± 1.30	15.03 ± 2.53	40.05 ± 5.13	89.27 ± 25.73	20.37 ± 2.19	149.69 ± 36.44	23.85 ± 10.37	2.71 ± 1.08	110.80 ± 47.44
leaves	6 h	cold+low light	cry2	0.26 ± 0.10	2.87 ± 0.55	42.77 ± 7.79	16.08 ± 3.17	4.46 ± 0.77	0.55 ± 0.07	14.14 ± 2.57	0.19 ± 0.11	0.03 ± 0.01	0.18 ± 0.06	13.98 ± 3.34	1.17 ± 0.32	1.67 ± 0.38	0.15 ± 0.04	1.33 ± 0.65	17.48 ± 3.75	2.80 ± 0.87	16.80 ± 4.72	0.43 ± 0.15	4.56 ± 1.10	32.61 ± 6.56	6.18 ± 1.05	93.11 ± 18.58	23.87 ± 5.98	82.10 ± 34.34	10.98 ± 6.16	15.32 ± 12.23	598.81 ± 173.13	30.62 ± 26.03	714.93 ± 285.97	1.39 ± 0.80	12.37 ± 2.92	27.75 ± 6.23	42.74 ± 13.65	16.73 ± 4.36	87.22 ± 10.32	22.79 ± 7.40	1.13 ± 0.45	72.40 ± 23.56
leaves	6 h	cold+low light	phyA	0.43 ± 0.13	3.58 ± 0.67	41.37 ± 0.65	16.12 ± 0.92	5.69 ± 1.28	0.50 ± 0.08	11.14 ± 1.73	0.18 ± 0.03	0.05 ± 0.03	0.38 ± 0.09	15.90 ± 0.82	2.13 ± 0.51	3.64 ± 1.52	0.36 ± 0.17	3.90 ± 1.57	21.16 ± 1.91	4.05 ± 0.95	39.45 ± 15.93	0.85 ± 0.27	8.03 ± 2.20	54.23 ± 15.90	8.32 ± 1.56	98.61 ± 3.42	16.37 ± 7.37	126.98 ± 39.72	12.52 ± 5.34	17.55 ± 7.97	588.93 ± 51.79	33.93 ± 29.29	761.23 ± 669.48	1.56 ± 0.65	14.86 ± 2.05	28.57 ± 3.28	96.64 ± 36.87	17.02 ± 2.49	142.23 ± 27.27	63.77 ± 42.15	16.01 ± 6.40	136.64 ± 82.36
leaves	6 h	cold+low light	phyB	0.23 ± 0.10	2.61 ± 1.68	26.64 ± 3.49	8.83 ± 1.88	2.98 ± 0.37	0.21 ± 0.10	6.59 ± 1.49	0.14 ± 0.03	0.04 ± 0.02	0.17 ± 0.06	12.99 ± 2.23	1.11 ± 0.54	1.60 ± 0.23	0.29 ± 0.15	1.06 ± 0.37	13.57 ± 4.18	3.03 ± 1.40	12.93 ± 1.90	0.56 ± 0.21	3.97 ± 1.89	21.13 ± 2.22	4.31 ± 0.91	65.06 ± 8.40	29.64 ± 5.72	164.27 ± 48.29	8.03 ± 5.63	36.19 ± 15.85	1 651.72 ± 562.13	26.94 ± 19.43	1 885.11 ± 250.55	2.44 ± 0.93	16.63 ± 4.35	36.64 ± 8.59	109.97 ± 31.29	19.69 ± 3.23	157.14 ± 31.43	35.18 ± 24.95	2.07 ± 0.83	105.61 ± 77.07
leaves	7 d	control	WT	0.23 ± 0.09	3.51 ± 1.29	35.88 ± 12.07	14.62 ± 2.39	8.77 ± 5.14	0.56 ± 0.24	15.19 ± 2.59	0.16 ± 0.09	0.06 ± 0.04	0.28 ± 0.09	11.65 ± 2.98	1.63 ± 0.64	1.93 ± 0.93	0.13 ± 0.08	3.28 ± 1.43	15.41 ± 2.86	1.39 ± 0.38	30.96 ± 7.70	0.42 ± 0.09	6.76 ± 2.57	38.91 ± 15.90	11.67 ± 5.53	74.68 ± 16.95	26.71 ± 15.65	47.09 ± 16.17	20.09 ± 11.53	13.61 ± 2.89	603.75 ± 87.03	45.88 ± 23.03	674.48 ± 322.64	1.59 ± 0.58	12.07 ± 3.84	29.03 ± 9.10	46.98 ± 19.37	16.04 ± 4.34	76.55 ± 3.95	35.18 ± 23.41	1.80 ± 0.72	139.02 ± 70.28
leaves	7 d	control	cry1	0.36 ± 0.09	6.42 ± 2.28	49.17 ± 6.07	21.04 ± 2.78	10.09 ± 4.57	0.71 ± 0.09	20.50 ± 5.03	0.20 ± 0.12	0.06 ± 0.02	0.57 ± 0.32	11.89 ± 2.77	1.26 ± 0.24	6.19 ± 3.40	0.12 ± 0.05	4.72 ± 1.39	12.11 ± 2.09	1.26 ± 0.18	38.08 ± 7.98	0.52 ± 0.08	11.84 ± 2.97	57.27 ± 15.95	12.06 ± 4.66	95.48 ± 6.27	34.80 ± 21.11	74.15 ± 23.72	11.99 ± 5.91	22.08 ± 5.12	608.94 ± 80.83	66.74 ± 22.20	730.85 ± 292.34	1.62 ± 0.32	13.58 ± 2.32	34.72 ± 9.00	92.77 ± 9.86	19.85 ± 5.98	147.35 ± 9.95	32.05 ± 11.90	2.09 ± 0.84	124.26 ± 64.32
leaves	7 d	control	cry2	0.31 ± 0.13	5.13 ± 1.10	46.24 ± 9.54	16.10 ± 2.97	8.16 ± 2.88	0.79 ± 0.14	20.06 ± 3.99	0.14 ± 0.04	0.07 ± 0.04	0.45 ± 0.25	13.30 ± 4.49	2.02 ± 0.24	3.75 ± 2.01	0.12 ± 0.06	3.98 ± 1.43	12.76 ± 1.16	1.64 ± 0.24	33.05 ± 3.05	0.48 ± 0.14	9.64 ± 2.23	48.04 ± 15.39	10.96 ± 2.89	90.04 ± 10.29	22.67 ± 3.15	32.03 ± 7.76	27.30 ± 15.15	17.56 ± 5.10	536.18 ± 52.96	74.16 ± 24.03	622.26 ± 434.70	1.43 ± 0.61	12.66 ± 1.59	25.37 ± 4.84	51.10 ± 17.68	13.61 ± 3.62	90.08 ± 17.44	64.35 ± 53.63	21.58 ± 8.63	155.50 ± 56.10
leaves	7 d	control	phyA	0.28 ± 0.08	4.28 ± 1.55	37.50 ± 10.70	13.53 ± 2.57	6.44 ± 2.44	0.59 ± 0.12	13.27 ± 2.33	0.12 ± 0.05	0.05 ± 0.02	0.42 ± 0.23	11.76 ± 2.41	1.80 ± 0.60	4.34 ± 2.30	0.10 ± 0.03	3.27 ± 1.74	11.50 ± 2.75	1.44 ± 0.48	23.13 ± 8.18	0.43 ± 0.07	8.04 ± 2.73	35.88 ± 11.85	8.80 ± 2.80	75.73 ± 17.08	28.63 ± 12.46	39.57 ± 10.81	10.02 ± 2.03	14.44 ± 5.27	500.92 ± 130.01	56.86 ± 15.27	568.38 ± 227.35	1.60 ± 0.66	12.09 ± 3.84	26.43 ± 5.74	62.96 ± 12.36	14.12 ± 3.40	103.50 ± 20.71	17.40 ± 8.32	3.37 ± 1.35	96.54 ± 27.96
leaves	7 d	control	phyB	0.17 ± 0.07	2.36 ± 0.61	26.71 ± 5.81	9.03 ± 2.09	4.17 ± 1.06	0.39 ± 0.12	9.23 ± 3.96	0.11 ± 0.02	0.06 ± 0.04	0.42 ± 0.18	13.29 ± 1.83	1.54 ± 0.38	3.74 ± 1.96	0.10 ± 0.04	1.55 ± 0.69	9.90 ± 1.88	1.56 ± 0.56	12.90 ± 2.21	0.33 ± 0.09	4.43 ± 1.28	21.70 ± 5.02	6.10 ± 1.08	60.49 ± 9.48	43.86 ± 14.60	106.74 ± 24.11	16.72 ± 6.67	37.78 ± 5.03	1 291.71 ± 300.80	69.60 ± 22.89	1 470.72 ± 773.53	2.34 ± 0.84	13.77 ± 1.88	36.26 ± 7.61	86.93 ± 34.37	19.87 ± 3.09	143.06 ± 19.08	15.29 ± 11.23	1.20 ± 0.48	157.91 ± 85.54
leaves	7 d	low light	WT	0.30 ± 0.08	0.87 ± 0.33	50.33 ± 5.61	13.29 ± 1.80	5.78 ± 1.42	0.28 ± 0.03	4.59 ± 1.24	0.04 ± 0.01	0.06 ± 0.02	0.11 ± 0.01	43.37 ± 6.12	3.82 ± 0.54	0.87 ± 0.30	0.22 ± 0.06	0.94 ± 0.30	20.05 ± 2.33	2.80 ± 0.44	15.18 ± 2.09	0.58 ± 0.07	1.96 ± 0.58	20.65 ± 1.90	9.89 ± 1.62	129.82 ± 9.72	19.98 ± 4.93	84.31 ± 40.59	22.05 ± 4.40	8.09 ± 1.96	583.78 ± 202.85	28.58 ± 21.08	729.21 ± 639.52	2.01 ± 0.63	10.80 ± 2.40	38.97 ± 4.19	163.22 ± 64.23	22.21 ± 4.07	220.70 ± 44.14	17.22 ± 4.06	2.76 ± 1.10	52.00 ± 11.75
leaves	7 d	low light	cry1	0.28 ± 0.05	1.21 ± 0.41	48.78 ± 4.98	15.14 ± 2.37	5.45 ± 0.89	0.33 ± 0.05	5.07 ± 0.71	0.03 ± 0.01	0.04 ± 0.02	0.17 ± 0.08	33.05 ± 5.15	2.41 ± 0.61	1.67 ± 0.91	0.15 ± 0.03	1.41 ± 0.51	18.78 ± 1.93	2.41 ± 0.77	17.13 ± 4.55	0.46 ± 0.05	2.81 ± 0.94	23.87 ± 5.30	8.19 ± 0.88	118.16 ± 10.49	39.62 ± 20.40	90.52 ± 16.02	6.75 ± 3.39	15.91 ± 6.07	603.34 ± 62.02	46.25 ± 15.99	746.56 ± 396.66	2.35 ± 1.24	11.10 ± 2.75	42.22 ± 9.60	173.43 ± 31.58	24.14 ± 4.93	239.79 ± 17.99	20.44 ± 13.43	10.85 ± 4.34	63.72 ± 23.68
leaves	7 d	low light	cry2	0.31 ± 0.07	1.37 ± 0.38	56.63 ± 5.65	15.13 ± 1.64	7.43 ± 2.66	0.43 ± 0.06	7.47 ± 3.03	0.03 ± 0.01	0.03 ± 0.01	0.14 ± 0.02	40.34 ± 4.13	3.87 ± 0.31	1.05 ± 0.26	0.22 ± 0.05	1.26 ± 0.18	19.12 ± 2.05	2.42 ± 0.24	16.68 ± 1.04	0.57 ± 0.06	2.79 ± 0.52	25.20 ± 3.88	11.73 ± 2.20	133.63 ± 12.23	22.78 ± 5.47	69.78 ± 30.08	19.88 ± 10.86	7.91 ± 1.39	497.84 ± 46.50	46.58 ± 11.79	607.26 ± 187.49	2.31 ± 0.42	10.76 ± 1.25	36.34 ± 12.42	130.66 ± 8.60	21.16 ± 3.88	188.15 ± 28.37	37.72 ± 16.68	7.74 ± 3.10	48.29 ± 9.67
leaves	7 d	low light	phyA	0.35 ± 0.17	1.13 ± 0.19	54.05 ± 5.75	13.66 ± 2.09	5.20 ± 0.59	0.42 ± 0.12	5.40 ± 0.92	0.03 ± 0.01	0.06 ± 0.02	0.12 ± 0.02	36.65 ± 3.95	3.76 ± 0.33	1.03 ± 0.15	0.20 ± 0.04	1.10 ± 0.35	20.52 ± 3.30	2.35 ± 0.12	15.84 ± 4.25	0.60 ± 0.15	2.38 ± 0.33	22.27 ± 3.67	9.38 ± 0.91	127.23 ± 11.53	22.16 ± 7.62	60.72 ± 17.34	14.11 ± 3.30	6.54 ± 1.92	469.37 ± 28.16	24.03 ± 14.11	567.18 ± 395.94	2.07 ± 0.41	9.00 ± 2.15	42.28 ± 11.91	117.88 ± 21.64	25.65 ± 3.03	185.81 ± 37.16	17.45 ± 13.16	8.90 ± 3.56	43.97 ± 9.69
leaves	7 d	low light	phyB	0.16 ± 0.05	0.37 ± 0.13	32.44 ± 7.36	8.58 ± 1.93	3.67 ± 0.67	0.19 ± 0.05	1.99 ± 0.94	0.03 ± 0.01	0.05 ± 0.01	0.09 ± 0.02	32.29 ± 5.47	3.58 ± 0.87	0.92 ± 0.24	0.27 ± 0.09	0.97 ± 0.72	12.59 ± 1.52	1.79 ± 0.25	12.87 ± 4.95	0.47 ± 0.12	1.47 ± 0.84	15.78 ± 5.46	7.44 ± 0.70	87.68 ± 14.79	28.72 ± 15.81	279.08 ± 85.78	17.20 ± 3.33	32.38 ± 16.36	1 355.04 ± 249.84	26.79 ± 14.41	1 740.44 ± 175.55	2.81 ± 1.09	12.25 ± 4.99	50.42 ± 10.96	190.16 ± 51.12	26.90 ± 3.33	267.49 ± 19.54	23.41 ± 19.92	3.56 ± 1.42	70.20 ± 46.40
leaves	7 d	cold	WT	1.52 ± 0.10	38.50 ± 5.25	53.38 ± 18.95	23.57 ± 3.18	12.39 ± 4.84	1.98 ± 0.72	80.87 ± 28.83	0.95 ± 0.30	0.06 ± 0.05	0.25 ± 0.20	11.34 ± 3.32	2.10 ± 0.85	0.47 ± 0.09	0.23 ± 0.09	15.09 ± 6.13	27.74 ± 6.76	2.04 ± 0.39	70.38 ± 34.77	1.80 ± 0.17	55.21 ± 8.92	151.75 ± 55.02	16.46 ± 5.67	117.71 ± 18.35	21.40 ± 12.48	96.27 ± 25.39	34.32 ± 18.28	3.69 ± 0.74	579.01 ± 68.36	181.24 ± 134.21	702.19 ± 507.75	1.59 ± 0.67	28.91 ± 7.68	55.65 ± 4.42	86.23 ± 27.15	29.79 ± 4.37	143.19 ± 28.64	137.47 ± 96.63	33.55 ± 13.42	141.48 ± 20.22
leaves	7 d	cold	cry1	0.77 ± 0.24	23.70 ± 6.87	69.97 ± 10.18	25.96 ± 4.11	10.86 ± 5.64	1.67 ± 0.64	67.72 ± 18.06	0.85 ± 0.52	0.02 ± 0.01	0.33 ± 0.24	13.41 ± 3.41	1.24 ± 0.34	0.62 ± 0.41	0.14 ± 0.02	9.07 ± 2.25	23.60 ± 2.31	2.17 ± 0.52	75.75 ± 16.43	0.93 ± 0.22	33.94 ± 7.88	144.10 ± 21.99	13.76 ± 5.99	135.11 ± 10.45	16.68 ± 6.60	83.86 ± 23.02	29.13 ± 19.03	6.98 ± 3.09	643.62 ± 52.79	113.38 ± 67.83	783.08 ± 313.23	2.09 ± 1.14	21.47 ± 6.94	54.14 ± 21.59	109.71 ± 19.66	32.60 ± 15.91	188.71 ± 12.42	140.63 ± 64.72	32.28 ± 12.91	278.03 ± 137.88
leaves	7 d	cold	cry2	0.98 ± 0.25	28.35 ± 3.34	56.75 ± 7.66	20.56 ± 6.05	13.69 ± 6.37	1.78 ± 0.25	67.18 ± 20.94	0.89 ± 0.16	0.05 ± 0.03	0.10 ± 0.01	12.26 ± 1.86	1.70 ± 0.53	0.61 ± 0.33	0.18 ± 0.05	9.27 ± 2.24	21.43 ± 2.28	1.81 ± 0.32	81.34 ± 23.77	1.21 ± 0.29	38.61 ± 5.00	149.13 ± 25.35	17.17 ± 6.44	112.81 ± 16.15	11.21 ± 3.36	77.35 ± 31.31	40.84 ± 33.27	5.81 ± 3.73	526.22 ± 60.55	95.73 ± 39.96	655.68 ± 262.27	1.61 ± 0.86	21.22 ± 5.26	59.10 ± 16.35	84.87 ± 39.11	32.53 ± 9.25	176.49 ± 11.83	80.41 ± 51.17	9.78 ± 3.91	166.95 ± 50.04
leaves	7 d	cold	phyA	1.64 ± 0.48	37.08 ± 4.34	57.87 ± 7.31	18.87 ± 3.92	10.05 ± 4.01	2.25 ± 0.49	83.20 ± 24.75	0.99 ± 0.20	0.04 ± 0.04	0.15 ± 0.03	15.50 ± 2.61	2.72 ± 0.77	0.61 ± 0.30	0.21 ± 0.07	17.68 ± 6.51	23.16 ± 3.02	1.85 ± 0.53	172.03 ± 107.37	1.89 ± 0.50	55.90 ± 5.10	255.84 ± 81.82	15.03 ± 3.72	117.26 ± 13.64	15.09 ± 5.39	117.02 ± 51.47	21.17 ± 11.58	3.48 ± 1.06	572.12 ± 125.08	93.96 ± 23.17	742.20 ± 296.88	1.27 ± 0.61	19.56 ± 1.07	71.42 ± 3.64	59.04 ± 16.95	36.46 ± 5.76	166.91 ± 80.86	62.47 ± 26.39	29.24 ± 11.70	119.23 ± 17.44
leaves	7 d	cold	phyB	0.96 ± 0.33	15.59 ± 6.52	39.04 ± 4.62	12.01 ± 2.23	6.83 ± 2.75	1.22 ± 0.30	47.14 ± 16.81	0.53 ± 0.19	0.03 ± 0.01	0.12 ± 0.03	14.35 ± 1.50	1.81 ± 0.39	0.73 ± 0.50	0.21 ± 0.07	9.16 ± 2.85	17.54 ± 2.62	1.63 ± 0.25	82.59 ± 16.44	1.20 ± 0.36	25.39 ± 9.12	130.45 ± 30.78	9.86 ± 2.69	84.57 ± 8.18	13.60 ± 5.98	202.51 ± 64.43	26.57 ± 8.99	7.96 ± 1.31	1 531.03 ± 243.22	121.27 ± 61.75	1 805.07 ± 722.03	2.58 ± 1.54	19.04 ± 4.88	64.21 ± 10.76	96.43 ± 38.79	29.35 ± 9.03	189.99 ± 76.00	202.59 ± 69.78	87.65 ± 35.06	166.71 ± 50.35
leaves	7 d	cold+low light	WT	0.35 ± 0.02	3.82 ± 0.75	47.78 ± 5.64	17.41 ± 4.73	6.68 ± 1.32	0.75 ± 0.05	25.59 ± 11.10	0.21 ± 0.10	0.08 ± 0.08	0.16 ± 0.04	13.68 ± 0.66	1.39 ± 0.06	0.72 ± 0.31	0.26 ± 0.11	2.31 ± 0.92	16.07 ± 2.54	2.50 ± 1.24	33.88 ± 3.54	0.70 ± 0.12	6.50 ± 1.01	60.19 ± 9.15	8.82 ± 1.32	97.44 ± 11.00	14.26 ± 4.10	81.74 ± 22.68	21.85 ± 14.35	6.89 ± 0.51	680.52 ± 112.68	21.42 ± 8.83	766.82 ± 306.73	1.08 ± 0.24	34.42 ± 27.05	66.16 ± 35.90	58.48 ± 28.50	32.03 ± 10.38	156.67 ± 62.67	91.43 ± 51.14	15.85 ± 6.34	103.06 ± 5.16
leaves	7 d	cold+low light	cry1	0.32 ± 0.07	4.84 ± 1.07	57.47 ± 6.77	22.77 ± 4.07	5.78 ± 0.85	0.62 ± 0.10	20.53 ± 8.60	0.19 ± 0.03	0.10 ± 0.07	0.21 ± 0.10	16.06 ± 2.23	1.15 ± 0.13	2.10 ± 1.54	0.27 ± 0.17	2.88 ± 1.23	19.08 ± 1.54	2.77 ± 0.88	36.16 ± 8.62	0.69 ± 0.18	8.12 ± 2.39	58.80 ± 13.27	7.55 ± 0.85	118.14 ± 12.40	16.21 ± 4.25	111.79 ± 29.69	6.06 ± 3.82	14.42 ± 5.14	740.97 ± 75.11	60.41 ± 35.18	897.88 ± 359.15	3.06 ± 0.79	29.84 ± 7.26	66.97 ± 17.48	159.30 ± 53.76	36.78 ± 6.30	263.05 ± 52.61	29.53 ± 16.75	3.22 ± 1.29	197.64 ± 75.22
leaves	7 d	cold+low light	cry2	0.33 ± 0.06	4.91 ± 1.26	55.63 ± 3.34	18.92 ± 1.81	6.21 ± 0.39	0.74 ± 0.09	19.13 ± 5.50	0.18 ± 0.04	0.13 ± 0.08	0.16 ± 0.03	17.06 ± 2.63	1.93 ± 0.29	1.56 ± 0.41	0.13 ± 0.03	2.58 ± 0.63	16.87 ± 2.54	2.56 ± 1.02	29.37 ± 4.14	0.59 ± 0.11	7.83 ± 1.82	50.05 ± 9.21	8.88 ± 0.31	111.05 ± 8.09	13.58 ± 1.64	68.75 ± 19.20	26.88 ± 13.52	8.95 ± 2.39	614.65 ± 50.27	56.97 ± 25.63	734.26 ± 293.70	1.90 ± 0.85	26.95 ± 9.72	110.77 ± 62.75	99.27 ± 30.75	51.90 ± 33.32	251.57 ± 25.61	167.70 ± 158.08	26.83 ± 10.73	124.95 ± 34.32
leaves	7 d	cold+low light	phyA	0.30 ± 0.07	3.39 ± 1.05	50.13 ± 10.20	17.70 ± 3.16	5.48 ± 0.82	0.68 ± 0.12	14.35 ± 5.85	0.15 ± 0.07	0.16 ± 0.15	0.12 ± 0.03	15.23 ± 1.92	1.99 ± 0.43	1.27 ± 0.24	0.17 ± 0.05	1.74 ± 0.37	19.24 ± 2.85	3.02 ± 0.93	22.98 ± 5.18	0.64 ± 0.22	5.42 ± 1.35	38.60 ± 10.88	8.15 ± 1.23	105.32 ± 16.04	16.20 ± 8.69	99.85 ± 33.68	28.67 ± 13.33	10.82 ± 6.56	548.55 ± 63.80	33.18 ± 16.93	703.73 ± 281.49	1.65 ± 1.27	23.48 ± 7.84	63.42 ± 23.02	85.43 ± 19.19	30.83 ± 11.58	179.69 ± 30.95	71.41 ± 52.97	8.06 ± 3.22	187.23 ± 114.75
leaves	7 d	cold+low light	phyB	0.32 ± 0.05	3.00 ± 0.63	30.17 ± 3.98	9.96 ± 1.47	3.30 ± 0.18	0.37 ± 0.06	14.19 ± 5.26	0.11 ± 0.03	0.04 ± 0.03	0.13 ± 0.04	15.69 ± 2.91	1.56 ± 0.30	0.89 ± 0.34	0.21 ± 0.07	2.04 ± 0.69	13.66 ± 2.11	2.47 ± 0.45	29.98 ± 3.97	0.58 ± 0.11	5.28 ± 1.34	45.06 ± 7.91	5.22 ± 0.36	71.95 ± 9.50	27.76 ± 9.61	173.50 ± 68.84	18.71 ± 8.06	22.87 ± 10.87	1 498.28 ± 91.15	38.27 ± 29.80	1 742.24 ± 1 429.19	3.22 ± 1.42	34.69 ± 9.05	83.17 ± 23.57	126.07 ± 28.48	42.02 ± 13.18	251.26 ± 29.04	95.54 ± 73.83	17.77 ± 7.11	133.04 ± 51.68
roots	30 min	control	WT	0.33 ± 0.10	5.27 ± 1.92	6.34 ± 1.99	6.40 ± 2.12	0.77 ± 0.34	0.16 ± 0.04	10.10 ± 4.17	0.34 ± 0.20	0.41 ± 0.24	3.10 ± 1.76	11.81 ± 2.19	0.24 ± 0.06	25.48 ± 13.29	1.66 ± 0.42	2.68 ± 1.04	7.31 ± 1.88	1.05 ± 0.48	19.54 ± 10.41	2.41 ± 0.56	11.39 ± 3.87	55.12 ± 23.74	1.17 ± 0.24	32.92 ± 3.60	97.86 ± 22.41	170.60 ± 113.75	18.32 ± 7.00	146.71 ± 23.68	555.29 ± 195.62	24.38 ± 8.73	936.62 ± 65.46	0.76 ± 0.61	2.84 ± 0.91	1.32 ± 0.36	43.25 ± 12.32	1.43 ± 0.59	46.12 ± 20.91	92.39 ± 50.67	237.82 ± 23.85	209.11 ± 63.49
roots	30 min	control	cry1	0.24 ± 0.05	3.28 ± 0.51	7.12 ± 1.70	5.07 ± 1.16	0.52 ± 0.24	0.21 ± 0.08	8.73 ± 3.08	0.21 ± 0.09	0.23 ± 0.09	2.24 ± 1.29	15.40 ± 3.85	0.20 ± 0.05	20.55 ± 11.97	1.16 ± 0.52	1.38 ± 0.55	5.56 ± 1.04	0.60 ± 0.06	16.72 ± 5.25	1.63 ± 1.31	7.12 ± 1.84	46.01 ± 15.05	0.93 ± 0.28	33.75 ± 4.68	113.44 ± 29.07	352.62 ± 209.71	16.10 ± 4.55	132.87 ± 42.45	476.07 ± 124.43	15.62 ± 2.97	1 046.75 ± 84.21	1.18 ± 1.06	3.82 ± 0.93	1.70 ± 0.27	62.70 ± 20.84	0.53 ± 0.08	64.91 ± 25.96	241.83 ± 156.25	399.77 ± 79.95	277.14 ± 51.83
roots	30 min	control	cry2	0.29 ± 0.04	4.17 ± 2.42	6.11 ± 0.75	4.65 ± 1.79	0.51 ± 0.17	0.20 ± 0.07	8.45 ± 4.10	0.23 ± 0.09	0.30 ± 0.11	2.16 ± 1.00	14.06 ± 4.76	0.15 ± 0.06	31.19 ± 15.50	1.56 ± 1.07	1.12 ± 0.48	4.50 ± 0.62	0.81 ± 0.37	11.04 ± 1.82	2.15 ± 1.08	7.68 ± 3.66	50.68 ± 14.59	0.86 ± 0.30	30.14 ± 6.07	101.03 ± 37.40	281.69 ± 171.91	11.86 ± 4.30	120.96 ± 49.49	413.46 ± 123.74	9.16 ± 1.35	882.63 ± 80.51	1.12 ± 0.63	5.32 ± 1.55	1.57 ± 0.75	51.41 ± 20.02	1.53 ± 1.08	54.51 ± 30.94	206.20 ± 111.91	296.05 ± 40.74	289.00 ± 111.65
roots	30 min	control	phyA	0.33 ± 0.14	6.75 ± 1.48	6.85 ± 0.96	5.18 ± 2.03	0.65 ± 0.27	0.19 ± 0.06	12.60 ± 2.35	0.27 ± 0.08	0.19 ± 0.06	3.91 ± 1.70	15.53 ± 4.65	0.26 ± 0.12	18.38 ± 8.35	0.94 ± 0.41	2.19 ± 0.75	5.63 ± 0.55	0.62 ± 0.10	18.92 ± 8.05	1.46 ± 0.54	13.12 ± 3.26	49.91 ± 4.43	1.10 ± 0.30	33.81 ± 6.71	104.65 ± 34.44	398.86 ± 226.34	12.07 ± 4.78	111.02 ± 26.60	428.86 ± 65.99	25.64 ± 16.68	955.26 ± 62.74	1.07 ± 0.82	3.00 ± 0.57	1.57 ± 0.26	83.58 ± 31.06	0.48 ± 0.05	85.55 ± 37.23	222.50 ± 132.65	152.17 ± 17.44	315.30 ± 99.29
roots	30 min	control	phyB	0.30 ± 0.11	5.01 ± 2.03	6.43 ± 1.55	5.03 ± 1.99	1.06 ± 0.43	0.28 ± 0.10	8.08 ± 1.32	0.34 ± 0.20	0.27 ± 0.06	1.86 ± 1.33	16.15 ± 3.52	0.26 ± 0.15	17.84 ± 6.35	0.93 ± 0.32	1.83 ± 1.16	5.94 ± 0.81	1.12 ± 0.42	13.69 ± 4.88	1.51 ± 0.36	9.04 ± 4.19	39.60 ± 9.28	1.61 ± 0.43	34.67 ± 5.67	98.94 ± 44.72	275.93 ± 206.11	18.27 ± 6.84	193.33 ± 36.57	547.91 ± 110.79	31.85 ± 18.72	1 031.39 ± 183.04	1.69 ± 1.18	4.60 ± 2.27	2.77 ± 1.06	81.97 ± 18.45	1.50 ± 0.93	85.63 ± 38.21	137.74 ± 107.62	52.50 ± 3.98	266.12 ± 37.68
roots	30 min	low light	WT	0.53 ± 0.30	8.38 ± 4.61	9.09 ± 1.83	4.65 ± 1.91	0.60 ± 0.31	0.23 ± 0.03	20.30 ± 12.63	0.58 ± 0.25	2.46 ± 2.16	4.19 ± 2.87	13.00 ± 0.99	0.50 ± 0.32	139.16 ± 47.73	2.00 ± 1.39	5.22 ± 3.51	6.25 ± 0.81	0.50 ± 0.22	39.68 ± 28.10	4.98 ± 3.32	18.38 ± 6.39	199.14 ± 66.72	1.33 ± 0.52	33.49 ± 4.78	198.14 ± 66.51	103.09 ± 54.52	9.62 ± 2.03	131.04 ± 40.96	313.65 ± 118.61	62.63 ± 33.95	558.58 ± 75.54	0.44 ± 0.19	2.09 ± 0.27	1.57 ± 1.14	72.96 ± 5.06	0.64 ± 0.40	75.17 ± 18.20	215.21 ± 72.95	176.04 ± 14.07	332.68 ± 127.80
roots	30 min	low light	cry1	0.57 ± 0.15	6.14 ± 1.33	7.77 ± 3.11	2.83 ± 0.71	0.80 ± 0.28	0.16 ± 0.05	29.30 ± 14.98	0.29 ± 0.21	1.77 ± 0.96	4.75 ± 2.99	20.01 ± 8.28	0.15 ± 0.03	139.23 ± 92.91	2.58 ± 2.08	3.69 ± 1.28	7.65 ± 2.08	0.59 ± 0.16	26.32 ± 4.31	4.92 ± 2.92	14.87 ± 4.10	194.85 ± 109.98	1.12 ± 0.86	38.86 ± 13.60	205.62 ± 13.55	72.79 ± 9.21	13.62 ± 1.34	108.84 ± 34.15	341.76 ± 65.80	154.05 ± 109.46	537.63 ± 67.27	0.85 ± 0.21	3.09 ± 1.03	3.12 ± 0.95	79.57 ± 12.36	2.05 ± 1.55	68.20 ± 22.12	407.98 ± 294.69	960.85 ± 192.17	304.67 ± 16.87
roots	30 min	low light	cry2	0.77 ± 0.24	6.90 ± 1.05	11.90 ± 1.61	5.26 ± 1.55	0.56 ± 0.15	0.34 ± 0.02	45.60 ± 21.98	0.57 ± 0.22	3.98 ± 0.42	2.52 ± 1.53	34.72 ± 1.31	0.42 ± 0.21	141.24 ± 77.48	2.55 ± 0.80	5.09 ± 0.63	10.15 ± 1.28	0.79 ± 0.13	21.28 ± 0.75	6.67 ± 1.30	15.08 ± 1.44	208.13 ± 99.17	1.32 ± 0.16	62.82 ± 3.12	302.93 ± 176.45	206.99 ± 125.96	21.80 ± 2.72	200.68 ± 25.93	619.53 ± 46.86	82.65 ± 55.56	1 051.74 ± 194.62	0.47 ± 0.22	3.45 ± 0.69	2.22 ± 0.98	106.41 ± 13.81	1.31 ± 0.38	109.94 ± 34.36	643.78 ± 210.21	1 434.81 ± 286.96	360.85 ± 26.23
roots	30 min	low light	phyA	0.82 ± 0.54	6.83 ± 1.40	8.54 ± 0.88	3.53 ± 0.84	0.52 ± 0.01	0.20 ± 0.04	15.25 ± 3.91	0.27 ± 0.11	1.87 ± 1.68	3.91 ± 3.30	21.02 ± 11.72	0.18 ± 0.01	45.73 ± 22.85	1.47 ± 0.62	3.14 ± 0.76	7.05 ± 1.75	0.68 ± 0.11	28.46 ± 2.86	4.16 ± 2.71	14.16 ± 3.41	89.43 ± 16.70	0.89 ± 0.03	40.82 ± 13.10	281.57 ± 91.49	143.56 ± 45.11	14.61 ± 2.63	138.14 ± 26.76	508.15 ± 109.21	84.73 ± 49.86	805.67 ± 124.10	1.67 ± 0.55	4.68 ± 1.58	3.95 ± 2.53	81.14 ± 11.50	3.41 ± 2.02	88.50 ± 22.16	294.02 ± 54.10	280.10 ± 56.02	767.01 ± 205.60
roots	30 min	low light	phyB	0.50 ± 0.06	4.34 ± 0.73	12.48 ± 1.66	6.39 ± 2.52	1.18 ± 0.53	0.26 ± 0.01	11.74 ± 1.85	0.24 ± 0.03	1.88 ± 1.25	1.91 ± 0.81	35.51 ± 14.99	0.22 ± 0.13	44.49 ± 20.71	0.90 ± 0.08	2.14 ± 0.69	10.09 ± 2.47	1.15 ± 0.49	19.51 ± 2.76	3.29 ± 1.25	8.63 ± 0.49	75.74 ± 21.54	1.66 ± 0.40	65.62 ± 12.82	291.38 ± 70.39	322.28 ± 165.40	24.32 ± 2.42	286.99 ± 48.99	1 297.89 ± 641.34	111.83 ± 63.34	1 936.13 ± 234.67	0.74 ± 0.20	5.40 ± 1.54	3.04 ± 1.54	173.13 ± 85.91	3.38 ± 2.63	179.54 ± 43.65	734.54 ± 112.55	547.64 ± 38.67	914.66 ± 245.18
roots	30 min	cold	WT	0.49 ± 0.22	14.52 ± 5.88	9.42 ± 1.68	5.10 ± 0.97	0.43 ± 0.15	0.28 ± 0.11	6.07 ± 2.95	0.90 ± 0.53	0.55 ± 0.37	3.18 ± 1.38	8.78 ± 2.18	0.34 ± 0.10	39.89 ± 20.75	0.84 ± 0.36	5.34 ± 3.09	8.17 ± 2.15	0.36 ± 0.05	50.74 ± 25.13	1.88 ± 0.44	23.94 ± 7.18	76.41 ± 45.82	1.05 ± 0.19	31.69 ± 4.45	146.74 ± 49.21	69.23 ± 18.48	15.47 ± 2.74	84.91 ± 18.85	388.59 ± 61.82	9.64 ± 3.66	562.18 ± 101.06	1.09 ± 0.55	2.26 ± 0.74	0.59 ± 0.24	49.22 ± 12.68	0.32 ± 0.12	50.13 ± 7.14	371.67 ± 224.84	522.62 ± 104.52	3 187.71 ± 1 557.72
roots	30 min	cold	cry1	0.62 ± 0.21	8.80 ± 0.33	13.15 ± 2.88	8.84 ± 1.88	0.65 ± 0.24	0.58 ± 0.34	3.69 ± 1.62	0.27 ± 0.14	0.71 ± 0.32	2.70 ± 1.06	22.24 ± 1.96	0.25 ± 0.10	33.46 ± 5.03	0.78 ± 0.07	3.14 ± 0.15	9.28 ± 2.07	0.87 ± 0.45	30.46 ± 3.24	2.11 ± 0.49	14.91 ± 1.52	67.61 ± 2.55	1.48 ± 0.51	54.38 ± 7.60	173.79 ± 52.31	57.54 ± 38.77	17.41 ± 4.66	159.86 ± 67.57	526.09 ± 91.86	62.93 ± 20.33	554.32 ± 81.62	2.08 ± 1.27	3.38 ± 0.40	2.60 ± 0.42	80.09 ± 46.28	2.22 ± 1.30	84.04 ± 25.34	443.67 ± 77.17	413.47 ± 82.69	292.33 ± 19.00
roots	30 min	cold	cry2	0.72 ± 0.54	9.56 ± 2.38	7.09 ± 1.67	3.11 ± 0.35	0.46 ± 0.10	0.16 ± 0.02	7.31 ± 2.13	0.72 ± 0.39	0.60 ± 0.37	4.65 ± 3.00	11.75 ± 1.12	0.29 ± 0.25	24.17 ± 13.60	0.80 ± 0.39	6.89 ± 2.78	5.83 ± 0.33	0.41 ± 0.09	51.14 ± 9.57	2.12 ± 0.96	21.82 ± 7.82	82.62 ± 17.33	0.91 ± 0.19	28.19 ± 2.62	193.24 ± 53.39	113.55 ± 44.42	11.91 ± 2.75	83.95 ± 35.90	340.96 ± 47.74	47.55 ± 34.65	541.51 ± 111.50	0.49 ± 0.17	2.41 ± 0.52	1.35 ± 0.43	82.08 ± 33.11	0.64 ± 0.04	84.08 ± 14.79	398.75 ± 171.65	489.81 ± 33.43	1 234.55 ± 897.27
roots	30 min	cold	phyA	0.83 ± 0.25	17.95 ± 4.42	9.40 ± 1.73	5.66 ± 1.81	0.73 ± 0.63	0.26 ± 0.09	3.40 ± 0.82	0.61 ± 0.27	0.43 ± 0.17	2.36 ± 1.37	10.71 ± 3.27	0.22 ± 0.07	22.97 ± 7.37	1.59 ± 0.63	4.32 ± 1.43	5.93 ± 0.86	0.60 ± 0.26	37.56 ± 22.85	2.86 ± 0.72	25.25 ± 6.77	63.94 ± 28.79	1.20 ± 0.72	32.30 ± 5.60	152.50 ± 72.61	77.71 ± 33.84	12.63 ± 5.99	91.57 ± 52.59	397.37 ± 221.38	41.20 ± 22.79	574.11 ± 95.01	1.34 ± 0.62	2.64 ± 0.97	1.30 ± 0.53	63.49 ± 17.35	0.74 ± 0.27	65.53 ± 7.25	423.56 ± 111.34	597.97 ± 119.59	405.92 ± 223.18
roots	30 min	cold	phyB	0.62 ± 0.27	8.90 ± 6.88	10.82 ± 2.69	4.77 ± 0.93	0.48 ± 0.30	0.41 ± 0.27	8.06 ± 4.26	0.41 ± 0.28	0.42 ± 0.37	2.19 ± 1.94	11.32 ± 6.19	0.32 ± 0.19	18.89 ± 9.54	1.60 ± 1.01	1.40 ± 0.28	5.65 ± 0.71	0.88 ± 0.38	14.79 ± 4.51	2.64 ± 0.86	12.90 ± 8.81	41.74 ± 10.09	1.22 ± 0.65	33.44 ± 5.79	239.71 ± 196.27	82.78 ± 27.89	12.49 ± 3.74	110.03 ± 33.74	535.62 ± 143.73	29.94 ± 14.04	741.96 ± 281.62	0.92 ± 0.37	2.97 ± 1.02	0.80 ± 0.52	75.19 ± 9.89	1.13 ± 0.77	77.12 ± 33.01	325.64 ± 203.50	437.59 ± 30.40	544.80 ± 231.83
roots	30 min	cold+low light	WT	0.66 ± 0.32	6.22 ± 1.87	9.75 ± 5.66	6.39 ± 2.36	0.47 ± 0.13	0.14 ± 0.12	4.61 ± 1.14	0.25 ± 0.15	0.62 ± 0.49	2.58 ± 1.22	13.58 ± 3.79	0.09 ± 0.07	26.22 ± 9.66	1.52 ± 0.88	2.41 ± 1.60	14.18 ± 3.93	0.79 ± 0.33	23.82 ± 11.03	2.80 ± 1.17	11.47 ± 3.36	54.66 ± 19.47	0.70 ± 0.20	44.69 ± 10.27	171.54 ± 77.79	191.62 ± 174.44	13.86 ± 9.84	73.17 ± 17.82	477.24 ± 261.08	28.21 ± 21.94	732.09 ± 42.76	2.11 ± 1.42	2.64 ± 1.22	0.60 ± 0.54	33.97 ± 15.14	0.71 ± 0.34	35.29 ± 4.65	150.16 ± 60.65	67.59 ± 13.52	2 084.28 ± 847.42
roots	30 min	cold+low light	cry1	0.35 ± 0.08	4.58 ± 1.27	7.76 ± 4.13	4.30 ± 2.97	0.15 ± 0.01	0.25 ± 0.13	6.33 ± 3.73	0.23 ± 0.03	0.52 ± 0.44	2.35 ± 1.08	14.00 ± 2.40	0.15 ± 0.09	63.02 ± 35.32	0.67 ± 0.21	1.79 ± 0.34	7.98 ± 3.59	0.85 ± 0.60	22.94 ± 5.96	1.54 ± 0.56	8.96 ± 0.55	92.29 ± 36.72	0.52 ± 0.16	34.89 ± 12.30	155.84 ± 44.45	112.58 ± 11.08	14.51 ± 4.18	157.04 ± 55.90	554.18 ± 116.70	57.13 ± 22.75	840.95 ± 238.69	1.14 ± 0.36	1.78 ± 0.32	1.70 ± 0.87	97.00 ± 23.23	2.40 ± 0.18	99.91 ± 36.83	320.85 ± 127.22	134.34 ± 26.87	693.16 ± 489.24
roots	30 min	cold+low light	cry2	0.35 ± 0.17	5.94 ± 3.02	7.82 ± 4.12	4.21 ± 1.71	0.42 ± 0.30	0.19 ± 0.09	5.34 ± 1.92	0.29 ± 0.08	0.77 ± 0.71	2.22 ± 1.38	13.10 ± 6.01	0.20 ± 0.10	44.27 ± 35.57	1.08 ± 0.67	2.86 ± 1.77	7.18 ± 2.86	1.03 ± 0.35	22.56 ± 6.00	2.20 ± 1.15	11.31 ± 4.43	72.16 ± 40.09	0.81 ± 0.35	33.34 ± 14.12	178.97 ± 80.06	546.79 ± 144.30	24.60 ± 14.33	114.94 ± 40.98	516.99 ± 225.69	35.22 ± 15.66	1 212.87 ± 76.53	0.50 ± 0.32	2.85 ± 0.34	2.72 ± 2.00	102.31 ± 39.55	2.77 ± 1.08	107.12 ± 12.52	274.58 ± 122.26	97.40 ± 19.48	951.86 ± 376.58
roots	30 min	cold+low light	phyA	0.19 ± 0.16	3.93 ± 2.99	3.88 ± 0.46	1.78 ± 0.12	0.46 ± 0.21	0.21 ± 0.08	8.88 ± 4.80	0.23 ± 0.14	0.46 ± 0.36	2.72 ± 1.19	17.18 ± 3.06	0.32 ± 0.17	24.43 ± 4.67	1.07 ± 0.37	3.39 ± 1.85	9.23 ± 1.92	0.81 ± 0.45	33.62 ± 5.06	1.72 ± 0.60	10.27 ± 7.24	66.93 ± 6.56	0.99 ± 0.33	32.88 ± 3.61	152.49 ± 55.12	376.33 ± 192.41	12.13 ± 1.96	174.51 ± 70.63	463.59 ± 102.29	63.25 ± 29.03	929.94 ± 171.30	2.08 ± 0.96	3.28 ± 1.24	1.70 ± 0.81	150.28 ± 59.70	2.42 ± 1.40	154.41 ± 30.12	488.59 ± 156.71	273.91 ± 54.78	1 633.54 ± 1 195.98
roots	30 min	cold+low light	phyB	0.27 ± 0.09	2.08 ± 0.63	6.56 ± 1.42	3.31 ± 0.74	0.82 ± 0.44	0.11 ± 0.03	3.44 ± 2.27	0.16 ± 0.09	0.81 ± 0.50	2.04 ± 1.81	13.83 ± 2.34	0.15 ± 0.06	39.43 ± 24.44	0.57 ± 0.08	1.91 ± 0.74	7.77 ± 4.61	0.43 ± 0.15	18.86 ± 5.76	1.65 ± 0.66	6.19 ± 2.85	61.72 ± 26.95	1.07 ± 0.52	31.92 ± 7.26	130.08 ± 40.18	291.23 ± 177.86	16.83 ± 11.90	114.76 ± 23.01	494.32 ± 61.89	32.42 ± 8.51	918.05 ± 285.57	1.53 ± 1.28	1.44 ± 0.49	1.65 ± 0.76	86.61 ± 47.15	4.42 ± 1.31	92.68 ± 40.02	277.38 ± 153.40	326.24 ± 65.25	1 056.48 ± 966.04
roots	6 h	control	WT	0.99 ± 0.14	8.06 ± 3.34	8.46 ± 1.75	3.65 ± 1.30	0.64 ± 0.30	0.27 ± 0.07	17.22 ± 4.43	0.39 ± 0.27	0.32 ± 0.15	2.73 ± 0.88	15.82 ± 3.14	0.18 ± 0.11	16.40 ± 7.75	1.54 ± 0.70	2.19 ± 1.25	9.22 ± 3.19	1.29 ± 0.71	36.46 ± 13.05	2.86 ± 0.63	13.38 ± 3.87	70.08 ± 23.81	1.09 ± 0.29	38.44 ± 8.34	265.02 ± 87.11	714.09 ± 458.00	15.97 ± 2.37	129.92 ± 13.87	568.55 ± 163.80	26.02 ± 16.05	1 272.88 ± 254.58	1.14 ± 0.70	3.30 ± 0.60	1.01 ± 0.35	30.85 ± 8.15	1.00 ± 0.52	33.30 ± 11.10	239.38 ± 97.36	45.54 ± 14.96	150.85 ± 42.83
roots	6 h	control	cry1	1.00 ± 0.17	8.56 ± 3.12	9.14 ± 2.03	6.90 ± 2.04	0.76 ± 0.40	0.23 ± 0.08	18.48 ± 7.32	0.32 ± 0.22	0.08 ± 0.01	1.71 ± 0.76	17.98 ± 4.98	0.13 ± 0.05	21.25 ± 7.56	1.71 ± 0.99	2.65 ± 0.69	8.22 ± 2.03	2.59 ± 0.73	35.72 ± 3.66	2.78 ± 0.88	13.24 ± 3.80	77.13 ± 14.16	1.13 ± 0.39	44.83 ± 8.01	224.22 ± 43.95	525.08 ± 76.86	14.83 ± 3.90	85.92 ± 21.10	467.78 ± 115.08	37.91 ± 18.48	1 091.15 ± 103.31	1.18 ± 0.37	4.13 ± 1.15	1.39 ± 0.60	49.50 ± 7.69	1.11 ± 0.58	52.00 ± 25.91	186.57 ± 63.00	186.08 ± 76.28	338.92 ± 222.89
roots	6 h	control	cry2	1.26 ± 0.42	8.99 ± 3.02	9.16 ± 1.98	5.08 ± 0.63	0.50 ± 0.09	0.24 ± 0.06	14.42 ± 2.12	0.37 ± 0.19	0.10 ± 0.05	3.07 ± 2.06	17.93 ± 3.36	0.17 ± 0.03	42.12 ± 20.70	2.20 ± 0.92	3.71 ± 1.74	8.78 ± 1.89	3.28 ± 1.58	47.04 ± 8.74	3.56 ± 1.12	16.14 ± 5.49	103.58 ± 25.42	0.91 ± 0.12	44.22 ± 3.06	232.77 ± 25.00	591.87 ± 246.93	18.05 ± 3.24	72.28 ± 26.51	582.41 ± 113.26	28.34 ± 6.77	1 328.12 ± 67.39	0.69 ± 0.29	3.92 ± 1.12	1.23 ± 0.55	40.15 ± 8.25	1.35 ± 1.09	42.72 ± 26.02	288.06 ± 113.70	263.36 ± 191.05	243.16 ± 138.03
roots	6 h	control	phyA	1.13 ± 0.34	7.48 ± 2.80	10.07 ± 1.97	7.07 ± 2.27	0.62 ± 0.20	0.21 ± 0.04	19.05 ± 5.63	0.33 ± 0.11	0.16 ± 0.09	2.01 ± 1.50	13.11 ± 3.23	0.15 ± 0.06	11.09 ± 10.75	2.57 ± 1.14	4.14 ± 1.43	8.09 ± 3.18	2.71 ± 1.70	49.99 ± 9.43	3.85 ± 1.21	13.96 ± 4.83	80.13 ± 14.00	0.98 ± 0.19	41.05 ± 6.89	268.88 ± 55.63	700.55 ± 352.89	16.84 ± 2.47	117.07 ± 38.04	597.39 ± 68.81	46.34 ± 15.88	1 484.77 ± 296.95	0.95 ± 0.45	5.87 ± 1.89	1.94 ± 0.51	53.44 ± 11.53	1.04 ± 0.35	56.42 ± 17.11	241.89 ± 74.90	404.63 ± 148.49	393.12 ± 324.58
roots	6 h	control	phyB	1.07 ± 0.49	3.34 ± 1.81	6.45 ± 1.71	4.30 ± 1.12	0.40 ± 0.15	0.12 ± 0.03	11.68 ± 6.26	0.19 ± 0.09	0.12 ± 0.04	1.32 ± 0.66	14.25 ± 1.13	0.13 ± 0.04	11.14 ± 3.48	1.16 ± 0.45	1.85 ± 0.13	7.54 ± 2.99	4.05 ± 1.66	26.31 ± 9.70	2.34 ± 0.65	6.70 ± 1.77	49.13 ± 13.63	0.65 ± 0.15	36.59 ± 4.68	181.28 ± 68.93	387.26 ± 165.24	14.36 ± 1.18	94.49 ± 41.06	592.89 ± 166.50	34.92 ± 7.68	1 112.82 ± 435.90	1.19 ± 0.46	4.24 ± 0.85	1.25 ± 0.35	45.60 ± 8.76	0.84 ± 0.26	47.68 ± 19.07	221.87 ± 123.15	74.35 ± 29.74	348.70 ± 236.57
roots	6 h	low light	WT	0.31 ± 0.05	2.39 ± 0.09	6.90 ± 1.15	3.87 ± 0.78	0.60 ± 0.16	0.17 ± 0.02	4.06 ± 0.37	0.33 ± 0.06	0.36 ± 0.09	0.84 ± 0.18	10.73 ± 1.09	0.12 ± 0.01	86.48 ± 14.12	0.60 ± 0.15	2.14 ± 0.22	5.33 ± 0.90	0.36 ± 0.04	21.42 ± 0.17	1.28 ± 0.08	5.71 ± 0.09	111.96 ± 14.54	0.89 ± 0.16	27.19 ± 3.89	117.45 ± 30.47	371.03 ± 44.41	6.35 ± 0.84	78.10 ± 3.02	235.88 ± 11.11	32.75 ± 7.18	706.14 ± 147.35	0.62 ± 0.33	2.51 ± 0.22	1.60 ± 0.65	44.50 ± 6.76	2.76 ± 0.92	48.86 ± 24.89	293.63 ± 36.21	349.48 ± 17.85	770.38 ± 133.39
roots	6 h	low light	cry1	0.35 ± 0.02	3.11 ± 1.54	8.57 ± 2.17	3.88 ± 0.66	0.51 ± 0.27	0.24 ± 0.04	3.55 ± 2.06	0.63 ± 0.55	0.65 ± 0.53	0.72 ± 0.50	19.10 ± 4.08	0.28 ± 0.17	9.00 ± 3.57	1.75 ± 1.34	3.11 ± 2.35	7.40 ± 0.81	1.39 ± 0.85	28.88 ± 15.41	2.75 ± 1.85	7.57 ± 4.11	41.43 ± 13.37	1.03 ± 0.23	40.34 ± 5.45	132.45 ± 6.76	1 657.66 ± 638.22	12.12 ± 2.29	156.36 ± 50.09	635.39 ± 37.14	87.71 ± 30.86	2 631.17 ± 526.23	0.42 ± 0.24	2.90 ± 0.41	1.37 ± 0.42	87.73 ± 24.44	0.68 ± 0.20	89.78 ± 14.25	370.12 ± 77.95	108.08 ± 21.62	171.61 ± 16.15
roots	6 h	low light	cry2	0.56 ± 0.09	4.06 ± 0.46	10.23 ± 0.27	4.41 ± 0.65	0.73 ± 0.22	0.34 ± 0.12	6.43 ± 2.26	0.43 ± 0.25	0.53 ± 0.25	2.24 ± 0.16	37.08 ± 6.90	0.32 ± 0.06	30.40 ± 8.49	2.23 ± 0.19	4.47 ± 1.32	10.55 ± 3.92	1.03 ± 0.32	25.57 ± 1.96	3.31 ± 0.35	11.20 ± 1.70	62.40 ± 6.69	1.38 ± 0.35	63.30 ± 2.65	275.12 ± 72.73	3 501.25 ± 2 018.72	20.05 ± 8.86	230.91 ± 24.78	740.65 ± 153.03	153.39 ± 73.81	4 668.10 ± 933.62	1.73 ± 0.57	4.55 ± 0.83	2.42 ± 1.19	77.43 ± 13.54	2.50 ± 1.04	82.35 ± 21.47	675.70 ± 198.27	1 815.38 ± 363.08	401.03 ± 107.50
roots	6 h	low light	phyA	0.35 ± 0.03	3.57 ± 0.65	9.51 ± 0.86	4.66 ± 0.39	0.45 ± 0.06	0.18 ± 0.01	27.17 ± 9.60	0.69 ± 0.26	0.65 ± 0.29	1.53 ± 0.77	15.38 ± 4.89	0.28 ± 0.11	195.63 ± 42.62	2.77 ± 1.78	3.45 ± 0.98	5.89 ± 1.37	0.59 ± 0.13	34.19 ± 9.55	3.77 ± 1.66	9.25 ± 2.39	256.98 ± 40.71	0.91 ± 0.14	36.03 ± 7.26	158.13 ± 15.01	1 168.29 ± 214.17	9.46 ± 2.29	129.04 ± 30.97	332.45 ± 74.90	57.75 ± 20.91	1 735.52 ± 107.50	0.46 ± 0.45	3.14 ± 0.61	1.76 ± 0.55	57.35 ± 9.15	1.49 ± 1.43	60.60 ± 13.20	326.34 ± 30.54	1 010.94 ± 202.19	219.82 ± 6.83
roots	6 h	low light	phyB	0.55 ± 0.27	4.22 ± 0.97	7.61 ± 2.93	3.59 ± 1.25	0.38 ± 0.13	0.19 ± 0.03	9.29 ± 5.48	0.41 ± 0.23	0.64 ± 0.47	2.53 ± 1.02	20.46 ± 1.70	0.23 ± 0.05	34.72 ± 7.03	2.88 ± 1.30	2.96 ± 0.84	7.90 ± 0.68	0.73 ± 0.08	24.81 ± 2.94	4.07 ± 1.59	10.11 ± 1.64	68.82 ± 9.71	0.80 ± 0.17	40.29 ± 6.11	168.56 ± 33.01	1 547.18 ± 457.91	13.40 ± 2.69	198.48 ± 76.29	586.33 ± 89.59	49.18 ± 7.43	2 451.26 ± 700.13	0.59 ± 0.50	3.22 ± 0.27	1.30 ± 0.48	75.39 ± 23.01	0.73 ± 0.27	77.42 ± 21.31	429.38 ± 51.67	761.35 ± 152.27	137.28 ± 0.79
roots	6 h	cold	WT	0.56 ± 0.09	11.49 ± 1.97	7.92 ± 1.25	4.40 ± 0.39	0.33 ± 0.06	0.22 ± 0.11	24.08 ± 1.22	0.45 ± 0.28	0.14 ± 0.03	1.32 ± 0.31	12.54 ± 1.44	0.18 ± 0.05	16.97 ± 16.52	1.51 ± 0.84	4.01 ± 3.40	7.92 ± 1.36	0.62 ± 0.07	27.53 ± 21.94	2.21 ± 0.91	17.27 ± 5.50	68.57 ± 39.53	0.73 ± 0.17	33.41 ± 2.69	142.48 ± 44.33	123.26 ± 91.55	12.20 ± 1.32	187.93 ± 60.99	472.76 ± 64.71	23.13 ± 7.96	954.64 ± 381.85	0.97 ± 0.60	5.86 ± 2.03	0.65 ± 0.40	53.24 ± 26.43	0.58 ± 0.39	54.48 ± 21.79	369.23 ± 106.71	343.89 ± 137.55	656.72 ± 103.62
roots	6 h	cold	cry1	0.77 ± 0.21	11.41 ± 6.09	9.26 ± 3.18	4.26 ± 1.40	0.75 ± 0.31	0.29 ± 0.17	27.80 ± 8.17	0.40 ± 0.29	0.21 ± 0.13	1.43 ± 0.34	15.39 ± 3.52	0.34 ± 0.17	26.16 ± 5.49	1.24 ± 0.77	5.09 ± 2.77	7.25 ± 0.83	1.73 ± 1.04	57.17 ± 3.99	2.22 ± 1.02	18.33 ± 9.37	111.13 ± 14.13	1.38 ± 0.58	37.90 ± 6.87	194.22 ± 81.47	149.94 ± 50.19	16.01 ± 3.27	78.63 ± 31.46	372.95 ± 108.60	63.18 ± 35.97	690.09 ± 50.80	1.66 ± 1.15	5.01 ± 0.64	1.66 ± 0.41	95.25 ± 8.61	0.73 ± 0.23	97.45 ± 14.49	454.02 ± 166.79	848.41 ± 169.68	1 120.29 ± 780.98
roots	6 h	cold	cry2	0.58 ± 0.15	15.26 ± 3.65	9.90 ± 0.73	5.16 ± 0.76	0.45 ± 0.20	0.26 ± 0.05	31.46 ± 14.79	0.79 ± 0.26	0.11 ± 0.08	1.74 ± 0.76	13.93 ± 1.08	0.22 ± 0.11	20.56 ± 8.73	1.02 ± 0.65	5.93 ± 0.88	6.80 ± 0.38	0.60 ± 0.08	61.19 ± 8.02	1.72 ± 0.62	23.71 ± 3.00	113.22 ± 19.41	0.93 ± 0.08	36.40 ± 2.56	242.24 ± 42.36	158.27 ± 72.56	12.36 ± 3.26	61.50 ± 10.22	325.15 ± 26.58	23.79 ± 7.52	625.22 ± 92.38	0.66 ± 0.32	4.57 ± 1.22	1.86 ± 0.59	74.41 ± 17.27	1.02 ± 0.65	77.03 ± 20.06	365.56 ± 64.76	538.15 ± 107.63	528.33 ± 166.61
roots	6 h	cold	phyA	1.56 ± 0.73	12.97 ± 4.96	8.18 ± 2.24	5.80 ± 1.66	0.59 ± 0.15	0.16 ± 0.04	23.53 ± 7.40	0.59 ± 0.32	0.23 ± 0.16	1.86 ± 1.12	10.69 ± 0.84	0.14 ± 0.03	18.39 ± 10.22	0.77 ± 0.31	5.09 ± 1.20	7.12 ± 1.51	1.31 ± 0.55	41.73 ± 3.01	2.56 ± 1.00	20.51 ± 6.01	83.65 ± 13.32	0.90 ± 0.18	33.10 ± 3.33	217.46 ± 35.97	186.91 ± 123.53	12.64 ± 0.68	108.79 ± 12.65	550.26 ± 74.44	26.05 ± 6.98	1 004.96 ± 101.09	1.16 ± 0.30	6.30 ± 2.15	2.33 ± 0.92	107.61 ± 6.95	1.24 ± 0.32	111.18 ± 22.46	369.77 ± 126.14	855.34 ± 171.07	1 887.49 ± 800.00
roots	6 h	cold	phyB	1.12 ± 0.70	6.48 ± 2.33	7.83 ± 2.72	4.71 ± 2.47	0.48 ± 0.30	0.35 ± 0.21	21.43 ± 6.77	0.17 ± 0.04	0.14 ± 0.04	1.04 ± 0.36	19.77 ± 4.22	0.32 ± 0.23	13.03 ± 3.92	1.10 ± 0.46	1.79 ± 0.30	8.92 ± 1.62	3.03 ± 2.23	34.51 ± 19.47	2.37 ± 0.77	9.49 ± 2.54	68.97 ± 14.49	1.14 ± 0.52	44.26 ± 8.70	157.38 ± 34.91	78.12 ± 11.83	12.44 ± 2.78	185.51 ± 140.71	496.93 ± 102.40	44.29 ± 27.00	777.95 ± 345.31	1.82 ± 1.25	6.61 ± 2.76	1.48 ± 0.76	77.78 ± 23.53	1.68 ± 1.22	80.61 ± 32.82	380.59 ± 197.02	115.82 ± 11.25	1 203.65 ± 638.74
roots	6 h	cold+low light	WT	0.64 ± 0.20	4.53 ± 2.02	8.64 ± 3.41	6.24 ± 2.11	0.64 ± 0.18	0.40 ± 0.13	8.93 ± 3.02	0.28 ± 0.19	0.20 ± 0.11	1.86 ± 1.04	13.38 ± 2.53	0.29 ± 0.20	28.47 ± 12.85	0.95 ± 0.29	2.18 ± 1.31	8.76 ± 2.39	0.90 ± 0.63	25.59 ± 13.04	1.79 ± 0.35	8.85 ± 3.06	62.99 ± 11.03	1.33 ± 0.35	37.92 ± 5.37	206.73 ± 89.23	166.22 ± 99.56	17.87 ± 11.35	58.41 ± 3.66	422.27 ± 76.84	28.57 ± 9.35	478.46 ± 107.56	0.80 ± 0.37	3.70 ± 0.39	1.23 ± 0.61	43.56 ± 14.23	0.67 ± 0.21	45.45 ± 8.94	165.96 ± 40.96	31.28 ± 9.47	718.63 ± 92.97
roots	6 h	cold+low light	cry1	0.42 ± 0.11	4.61 ± 1.59	7.81 ± 0.86	3.78 ± 0.62	0.49 ± 0.37	0.19 ± 0.02	11.03 ± 1.65	0.21 ± 0.11	0.15 ± 0.02	1.41 ± 0.42	13.93 ± 3.59	0.33 ± 0.32	30.61 ± 13.11	1.80 ± 1.24	2.32 ± 1.01	6.25 ± 0.56	1.06 ± 0.75	28.99 ± 7.79	2.38 ± 1.14	8.56 ± 2.73	70.63 ± 9.50	1.00 ± 0.67	32.83 ± 4.96	171.79 ± 33.85	917.43 ± 453.36	17.82 ± 5.65	99.50 ± 17.93	597.21 ± 150.70	26.53 ± 20.42	1 784.22 ± 155.93	1.03 ± 0.45	2.76 ± 0.38	1.46 ± 0.45	100.18 ± 35.09	0.50 ± 0.12	102.03 ± 23.09	236.95 ± 98.99	141.62 ± 28.32	759.61 ± 228.83
roots	6 h	cold+low light	cry2	0.44 ± 0.13	5.46 ± 0.61	9.40 ± 1.67	4.50 ± 0.69	0.46 ± 0.25	0.24 ± 0.07	15.41 ± 1.88	0.19 ± 0.04	0.13 ± 0.03	1.80 ± 1.11	15.53 ± 1.19	0.24 ± 0.05	24.47 ± 7.52	0.87 ± 0.46	2.98 ± 0.62	6.45 ± 0.88	1.54 ± 0.44	32.57 ± 9.30	1.45 ± 0.55	10.43 ± 1.77	72.45 ± 17.13	0.94 ± 0.27	37.43 ± 4.46	157.92 ± 59.36	2 288.28 ± 2 073.71	12.70 ± 2.89	90.02 ± 29.87	448.10 ± 43.89	22.81 ± 11.28	3 073.98 ± 197.53	0.73 ± 0.58	3.50 ± 0.21	1.64 ± 0.84	84.17 ± 10.52	0.86 ± 0.44	86.67 ± 18.52	250.26 ± 88.35	58.50 ± 11.70	805.34 ± 353.25
roots	6 h	cold+low light	phyA	0.44 ± 0.20	3.34 ± 1.29	7.23 ± 2.45	3.69 ± 1.23	0.78 ± 0.36	0.19 ± 0.04	4.76 ± 4.17	0.15 ± 0.05	0.24 ± 0.09	1.68 ± 1.02	20.20 ± 4.83	0.33 ± 0.10	27.01 ± 15.55	1.42 ± 1.16	1.90 ± 0.41	6.79 ± 0.89	0.95 ± 0.22	32.98 ± 7.95	2.10 ± 1.05	7.08 ± 2.31	64.75 ± 24.01	1.29 ± 0.33	38.85 ± 8.70	110.87 ± 13.98	1 505.56 ± 775.15	20.10 ± 14.54	104.16 ± 12.99	475.85 ± 119.02	21.57 ± 8.61	2 244.64 ± 448.93	1.19 ± 0.94	3.50 ± 0.96	2.27 ± 1.32	89.46 ± 26.56	1.34 ± 0.75	93.07 ± 38.89	254.87 ± 53.43	101.63 ± 11.78	832.49 ± 262.82
roots	6 h	cold+low light	phyB	0.58 ± 0.26	2.69 ± 0.19	7.26 ± 1.67	6.13 ± 2.65	0.64 ± 0.42	0.13 ± 0.06	7.15 ± 1.65	0.25 ± 0.10	0.22 ± 0.12	1.72 ± 0.67	23.45 ± 7.33	0.25 ± 0.09	18.11 ± 8.83	1.10 ± 0.39	1.49 ± 0.56	8.63 ± 0.96	0.83 ± 0.35	20.23 ± 12.84	1.90 ± 0.56	6.14 ± 1.36	45.49 ± 18.83	1.02 ± 0.50	46.29 ± 8.60	119.15 ± 24.37	455.61 ± 366.75	16.46 ± 7.87	111.74 ± 46.23	538.95 ± 213.46	28.93 ± 18.94	1 105.95 ± 321.15	1.33 ± 0.65	3.54 ± 0.80	0.96 ± 0.66	76.93 ± 34.24	0.90 ± 0.55	78.78 ± 38.05	302.52 ± 58.34	150.99 ± 30.20	850.86 ± 359.80
roots	7 d	control	WT	0.38 ± 0.19	12.02 ± 2.89	5.59 ± 2.35	4.12 ± 2.04	0.68 ± 0.52	0.15 ± 0.07	16.26 ± 8.82	1.25 ± 0.53	0.41 ± 0.21	44.33 ± 26.61	9.82 ± 4.41	0.47 ± 0.32	226.10 ± 105.62	3.47 ± 1.57	8.77 ± 1.41	5.91 ± 1.41	0.49 ± 0.13	58.59 ± 24.94	4.16 ± 3.79	66.96 ± 26.11	277.02 ± 122.95	1.08 ± 0.55	25.22 ± 6.71	177.59 ± 69.78	185.10 ± 62.08	6.79 ± 2.08	133.43 ± 67.53	478.31 ± 213.06	43.21 ± 35.42	907.28 ± 81.08	0.45 ± 0.20	2.30 ± 0.52	0.90 ± 0.33	57.63 ± 16.93	0.49 ± 0.33	54.10 ± 18.62	691.55 ± 215.88	1 182.62 ± 236.52	157.98 ± 67.10
roots	7 d	control	cry1	0.47 ± 0.33	8.14 ± 0.72	10.38 ± 3.76	6.08 ± 1.71	0.81 ± 0.43	0.31 ± 0.10	24.12 ± 8.59	1.36 ± 0.65	0.63 ± 0.22	45.01 ± 24.94	17.22 ± 4.87	0.60 ± 0.26	99.60 ± 76.00	3.28 ± 3.14	11.17 ± 2.08	6.44 ± 1.46	0.59 ± 0.20	71.43 ± 40.16	4.70 ± 2.92	64.27 ± 28.28	197.53 ± 94.04	1.60 ± 0.40	40.71 ± 9.80	139.85 ± 73.77	465.74 ± 289.03	7.34 ± 3.09	126.04 ± 33.68	395.85 ± 193.77	45.73 ± 24.23	1 121.97 ± 61.69	0.56 ± 0.34	2.82 ± 0.64	1.51 ± 0.57	70.08 ± 16.20	0.80 ± 0.35	72.20 ± 14.74	610.07 ± 176.37	109.45 ± 21.89	196.27 ± 78.88
roots	7 d	control	cry2	0.63 ± 0.32	12.01 ± 4.60	10.68 ± 4.30	6.39 ± 1.62	0.72 ± 0.44	0.25 ± 0.10	19.67 ± 8.85	1.38 ± 0.66	0.53 ± 0.17	34.72 ± 17.85	16.10 ± 3.16	0.39 ± 0.21	186.39 ± 74.67	5.99 ± 3.72	10.12 ± 2.53	6.35 ± 1.33	0.50 ± 0.11	44.42 ± 16.32	6.81 ± 3.53	48.11 ± 23.10	223.26 ± 56.13	1.18 ± 0.58	40.02 ± 6.82	211.87 ± 55.76	319.44 ± 292.67	6.92 ± 2.14	147.79 ± 69.23	286.37 ± 90.19	16.91 ± 8.18	822.30 ± 49.57	0.34 ± 0.19	2.16 ± 0.97	0.96 ± 0.48	59.83 ± 18.88	0.61 ± 0.32	61.42 ± 19.75	335.60 ± 156.14	501.09 ± 100.22	279.46 ± 122.55
roots	7 d	control	phyA	0.39 ± 0.12	8.49 ± 2.16	8.83 ± 2.81	5.28 ± 1.03	0.53 ± 0.20	0.28 ± 0.11	27.55 ± 16.79	1.08 ± 0.43	0.62 ± 0.28	28.76 ± 14.71	15.86 ± 6.21	0.58 ± 0.23	218.20 ± 193.84	5.23 ± 3.81	7.88 ± 2.05	5.73 ± 0.56	0.70 ± 0.40	36.12 ± 13.50	6.25 ± 3.71	46.03 ± 17.07	263.68 ± 184.24	1.38 ± 0.46	36.39 ± 9.29	268.88 ± 120.53	277.93 ± 184.39	6.98 ± 5.15	117.30 ± 31.06	420.03 ± 241.48	27.26 ± 17.00	971.56 ± 155.72	0.64 ± 0.44	2.99 ± 1.09	1.49 ± 0.60	67.58 ± 20.34	0.87 ± 0.22	69.83 ± 18.92	408.54 ± 88.30	418.60 ± 83.72	231.24 ± 35.40
roots	7 d	control	phyB	0.34 ± 0.07	6.51 ± 1.19	10.88 ± 4.59	5.62 ± 1.87	0.64 ± 0.51	0.23 ± 0.03	17.99 ± 8.58	1.33 ± 0.73	0.65 ± 0.36	39.89 ± 25.29	17.93 ± 4.74	0.33 ± 0.15	88.70 ± 75.49	6.31 ± 3.07	8.56 ± 4.33	6.69 ± 2.22	0.77 ± 0.33	28.36 ± 14.08	7.08 ± 2.89	56.29 ± 30.86	116.39 ± 60.36	1.21 ± 0.56	41.09 ± 13.07	161.46 ± 55.13	260.34 ± 94.85	8.15 ± 1.00	192.93 ± 39.19	556.83 ± 132.30	70.64 ± 43.84	1 181.43 ± 247.97	0.60 ± 0.10	3.06 ± 0.96	1.26 ± 0.40	83.27 ± 18.58	0.87 ± 0.36	85.40 ± 20.42	569.47 ± 195.24	1 654.37 ± 330.87	336.71 ± 70.53
roots	7 d	low light	WT	0.26 ± 0.03	1.42 ± 0.41	10.24 ± 2.05	5.01 ± 1.56	1.01 ± 0.68	0.14 ± 0.02	2.83 ± 0.47	0.05 ± 0.01	0.07 ± 0.01	0.50 ± 0.13	32.56 ± 4.86	0.11 ± 0.02	6.77 ± 2.39	0.27 ± 0.06	0.60 ± 0.14	9.64 ± 2.01	1.38 ± 0.20	7.32 ± 1.76	0.61 ± 0.07	2.57 ± 0.59	16.92 ± 3.27	1.27 ± 0.69	58.83 ± 7.69	97.31 ± 29.37	811.30 ± 560.91	15.44 ± 7.70	47.38 ± 13.30	169.42 ± 36.04	51.47 ± 34.24	1 097.74 ± 264.87	1.43 ± 0.55	2.10 ± 0.41	2.01 ± 1.16	70.49 ± 11.94	0.45 ± 0.33	72.46 ± 55.15	65.37 ± 36.15	28.98 ± 5.80	170.14 ± 63.24
roots	7 d	low light	cry1	0.28 ± 0.09	2.00 ± 0.78	11.87 ± 3.23	7.13 ± 1.48	1.15 ± 0.29	0.13 ± 0.02	5.00 ± 2.12	0.07 ± 0.03	0.08 ± 0.03	1.02 ± 0.53	29.87 ± 7.23	0.12 ± 0.02	27.19 ± 20.92	0.34 ± 0.14	0.98 ± 0.41	11.66 ± 1.17	1.08 ± 0.24	12.62 ± 2.38	0.70 ± 0.24	4.06 ± 1.16	44.80 ± 20.53	1.41 ± 0.29	61.60 ± 11.72	71.75 ± 20.72	525.57 ± 265.63	9.97 ± 2.94	66.49 ± 33.17	163.47 ± 124.52	37.17 ± 17.38	758.53 ± 65.95	0.90 ± 0.41	1.77 ± 0.16	1.67 ± 0.38	117.77 ± 17.07	0.48 ± 0.18	119.83 ± 26.82	123.00 ± 55.04	67.01 ± 9.94	85.51 ± 37.77
roots	7 d	low light	cry2	0.23 ± 0.03	1.62 ± 0.72	10.50 ± 1.80	5.60 ± 0.56	0.98 ± 0.52	0.16 ± 0.03	3.45 ± 1.77	0.10 ± 0.04	0.07 ± 0.03	2.28 ± 1.98	28.17 ± 1.28	0.12 ± 0.03	48.07 ± 22.63	0.22 ± 0.08	1.19 ± 0.38	9.52 ± 1.19	0.86 ± 0.23	15.76 ± 6.63	0.52 ± 0.09	5.19 ± 2.10	67.28 ± 21.40	1.25 ± 0.55	54.65 ± 4.17	104.16 ± 50.92	444.66 ± 146.93	7.72 ± 2.68	54.28 ± 5.56	148.62 ± 50.77	17.04 ± 3.31	683.02 ± 62.04	0.47 ± 0.20	1.49 ± 0.13	1.10 ± 0.19	94.30 ± 27.72	1.00 ± 0.40	96.21 ± 16.05	78.41 ± 41.98	335.44 ± 67.09	138.06 ± 83.03
roots	7 d	low light	phyA	0.23 ± 0.07	1.47 ± 0.53	8.32 ± 0.71	4.95 ± 0.46	0.60 ± 0.46	0.19 ± 0.09	2.79 ± 0.91	0.15 ± 0.09	0.09 ± 0.03	2.76 ± 2.06	31.36 ± 3.14	0.13 ± 0.03	18.72 ± 3.98	0.25 ± 0.09	1.15 ± 0.65	12.87 ± 2.52	1.52 ± 0.78	14.51 ± 7.86	0.58 ± 0.14	5.53 ± 2.04	36.02 ± 9.48	0.92 ± 0.33	54.59 ± 3.59	126.52 ± 30.91	528.28 ± 139.96	13.16 ± 4.36	55.59 ± 10.04	157.99 ± 76.98	37.11 ± 27.36	834.17 ± 166.83	0.76 ± 0.37	2.24 ± 1.05	1.80 ± 0.52	76.07 ± 8.39	0.55 ± 0.18	78.33 ± 28.02	191.23 ± 44.96	167.51 ± 10.99	156.98 ± 28.37
roots	7 d	low light	phyB	0.21 ± 0.05	1.28 ± 0.38	11.60 ± 2.63	5.71 ± 1.25	0.93 ± 0.24	0.13 ± 0.01	2.00 ± 0.80	0.09 ± 0.03	0.09 ± 0.03	1.98 ± 1.31	26.62 ± 6.60	0.08 ± 0.02	34.67 ± 29.38	0.23 ± 0.10	0.84 ± 0.25	8.54 ± 2.01	0.92 ± 0.17	8.62 ± 2.53	0.90 ± 0.75	4.19 ± 1.40	45.30 ± 31.09	1.14 ± 0.22	53.38 ± 10.97	125.87 ± 34.03	309.87 ± 178.19	8.33 ± 1.92	49.58 ± 21.76	147.62 ± 88.19	36.74 ± 17.64	547.71 ± 242.38	0.48 ± 0.21	1.91 ± 0.15	1.37 ± 0.38	75.46 ± 19.09	0.36 ± 0.26	77.19 ± 51.28	116.40 ± 48.32	221.40 ± 44.28	167.40 ± 88.61
roots	7 d	cold	WT	1.76 ± 1.10	52.05 ± 11.43	15.00 ± 8.19	10.15 ± 2.80	1.62 ± 1.33	0.24 ± 0.08	73.44 ± 19.16	2.09 ± 0.41	0.39 ± 0.34	6.23 ± 4.80	6.72 ± 3.68	0.20 ± 0.07	148.96 ± 86.34	3.18 ± 3.02	11.55 ± 4.69	8.68 ± 2.91	0.35 ± 0.08	59.49 ± 22.47	3.98 ± 1.86	46.53 ± 29.85	157.24 ± 123.98	2.03 ± 1.45	40.81 ± 12.96	312.33 ± 219.64	708.22 ± 484.51	95.16 ± 20.47	61.60 ± 22.00	693.18 ± 177.61	30.73 ± 12.90	1 179.25 ± 235.85	0.87 ± 0.38	7.38 ± 2.27	1.82 ± 0.85	168.87 ± 58.66	1.06 ± 0.42	171.75 ± 36.23	685.59 ± 265.37	512.03 ± 102.41	597.03 ± 396.93
roots	7 d	cold	cry1	3.80 ± 0.46	36.70 ± 8.40	15.74 ± 6.15	5.96 ± 3.36	0.93 ± 0.40	0.35 ± 0.01	57.77 ± 11.76	2.76 ± 0.88	1.26 ± 0.42	2.82 ± 1.53	7.68 ± 1.62	0.54 ± 0.18	122.93 ± 67.04	3.87 ± 2.24	5.74 ± 3.30	6.53 ± 0.76	0.36 ± 0.06	34.01 ± 12.69	8.93 ± 2.61	48.03 ± 10.21	214.71 ± 64.02	1.82 ± 0.48	36.27 ± 11.86	173.50 ± 8.63	1 216.38 ± 176.09	104.06 ± 7.75	82.73 ± 3.40	862.74 ± 166.28	76.12 ± 24.98	2 498.55 ± 499.71	0.95 ± 0.77	7.42 ± 0.91	3.92 ± 0.55	126.68 ± 12.15	0.77 ± 0.20	131.36 ± 36.53	500.68 ± 215.82	137.82 ± 39.85	984.10 ± 192.79
roots	7 d	cold	cry2	2.19 ± 1.02	27.38 ± 6.53	14.67 ± 1.33	6.96 ± 0.87	1.32 ± 0.27	0.31 ± 0.09	63.18 ± 19.82	2.21 ± 1.45	0.43 ± 0.29	1.41 ± 0.30	11.97 ± 0.84	0.45 ± 0.09	53.02 ± 21.56	4.16 ± 2.59	4.34 ± 0.98	7.99 ± 0.96	1.83 ± 0.84	47.91 ± 5.15	6.79 ± 3.83	35.34 ± 7.76	164.12 ± 11.23	2.08 ± 0.39	43.42 ± 2.54	379.98 ± 188.98	1 464.53 ± 547.72	104.38 ± 53.29	64.40 ± 19.61	756.43 ± 275.69	83.68 ± 45.95	2 584.04 ± 268.49	0.57 ± 0.19	6.95 ± 1.59	2.56 ± 0.62	142.58 ± 12.48	1.02 ± 0.12	146.16 ± 45.80	725.81 ± 1.72	386.14 ± 41.23	938.08 ± 36.83
roots	7 d	cold	phyA	2.37 ± 0.38	39.87 ± 3.23	18.29 ± 4.95	10.00 ± 2.26	3.13 ± 1.35	0.26 ± 0.08	67.36 ± 9.19	0.98 ± 0.32	0.34 ± 0.28	3.82 ± 2.37	10.22 ± 3.24	0.18 ± 0.02	81.38 ± 44.01	1.24 ± 0.33	5.92 ± 1.93	6.22 ± 0.50	0.41 ± 0.23	57.35 ± 9.04	3.95 ± 0.44	50.58 ± 5.99	206.09 ± 44.21	3.57 ± 1.41	45.13 ± 8.04	89.49 ± 67.90	1 339.86 ± 890.41	39.77 ± 9.90	74.78 ± 8.49	571.23 ± 94.04	26.57 ± 14.15	2 285.63 ± 117.92	0.44 ± 0.05	4.77 ± 0.63	1.88 ± 0.50	183.57 ± 80.30	0.58 ± 0.26	186.04 ± 18.16	816.59 ± 87.03	324.68 ± 52.33	1 151.92 ± 392.42
roots	7 d	cold	phyB	1.36 ± 0.48	29.79 ± 8.33	13.06 ± 2.40	6.73 ± 1.44	0.85 ± 0.30	0.30 ± 0.07	67.55 ± 22.52	1.33 ± 0.43	0.13 ± 0.08	1.32 ± 0.58	15.54 ± 2.71	0.22 ± 0.07	18.76 ± 7.51	0.37 ± 0.17	2.51 ± 0.74	7.22 ± 1.16	0.70 ± 0.24	34.03 ± 8.71	1.86 ± 0.71	34.95 ± 9.43	120.34 ± 30.26	1.37 ± 0.39	43.25 ± 6.25	190.23 ± 56.99	3 339.42 ± 1 417.59	62.64 ± 24.30	57.15 ± 15.62	670.09 ± 138.45	22.30 ± 9.23	4 302.23 ± 288.98	0.39 ± 0.18	4.41 ± 1.02	2.37 ± 0.71	103.50 ± 25.11	0.19 ± 0.08	106.06 ± 28.50	534.55 ± 225.83	247.70 ± 70.26	767.33 ± 205.69
roots	7 d	cold+low light	WT	0.60 ± 0.05	5.10 ± 3.60	9.38 ± 2.96	7.44 ± 2.29	0.59 ± 0.51	0.09 ± 0.02	16.70 ± 5.48	0.37 ± 0.31	0.43 ± 0.35	1.47 ± 1.01	15.39 ± 2.52	0.18 ± 0.10	27.42 ± 12.26	0.71 ± 0.33	3.46 ± 1.32	9.19 ± 2.01	1.07 ± 0.37	19.07 ± 9.05	1.66 ± 0.52	10.40 ± 2.59	63.19 ± 15.19	0.85 ± 0.56	42.25 ± 6.76	440.09 ± 159.58	338.12 ± 111.60	31.30 ± 11.08	85.08 ± 18.82	358.99 ± 77.16	254.16 ± 228.89	1 084.93 ± 216.99	0.48 ± 0.14	12.63 ± 3.24	3.05 ± 0.22	85.18 ± 36.39	1.31 ± 0.44	88.78 ± 31.35	431.24 ± 179.49	168.10 ± 44.40	534.46 ± 131.33
roots	7 d	cold+low light	cry1	0.94 ± 0.45	12.94 ± 9.44	12.91 ± 3.92	5.27 ± 1.53	0.99 ± 0.65	0.24 ± 0.07	35.52 ± 15.74	0.77 ± 0.26	0.45 ± 0.33	2.31 ± 1.68	17.70 ± 2.54	0.19 ± 0.04	31.41 ± 17.24	1.51 ± 0.87	2.92 ± 1.35	7.00 ± 0.49	2.34 ± 1.41	31.59 ± 5.81	2.90 ± 1.26	18.94 ± 8.95	98.52 ± 17.60	1.42 ± 0.58	45.24 ± 5.49	266.81 ± 36.68	771.98 ± 407.18	25.73 ± 2.78	88.72 ± 24.61	541.97 ± 120.22	23.64 ± 13.78	1 537.12 ± 307.42	1.51 ± 0.62	6.09 ± 1.79	2.68 ± 0.77	159.12 ± 12.47	0.79 ± 0.23	162.59 ± 75.67	585.71 ± 210.27	433.86 ± 86.77	899.52 ± 21.92
roots	7 d	cold+low light	cry2	1.11 ± 0.43	10.34 ± 5.98	8.84 ± 2.25	4.56 ± 1.38	0.42 ± 0.10	0.18 ± 0.07	23.25 ± 12.97	0.46 ± 0.19	1.17 ± 0.50	6.75 ± 2.99	15.16 ± 2.79	0.26 ± 0.08	103.78 ± 64.73	1.33 ± 0.34	5.02 ± 1.69	5.80 ± 1.43	0.72 ± 0.34	34.26 ± 13.54	3.61 ± 0.93	22.57 ± 9.70	161.30 ± 68.75	0.85 ± 0.20	35.09 ± 6.99	478.04 ± 290.46	1 062.79 ± 560.44	16.19 ± 5.77	66.24 ± 22.42	335.17 ± 78.78	162.36 ± 144.58	1 834.72 ± 366.94	0.83 ± 0.36	4.91 ± 1.61	1.82 ± 0.51	91.14 ± 25.81	1.03 ± 0.31	93.99 ± 37.60	489.61 ± 109.77	620.44 ± 65.85	620.56 ± 162.25
roots	7 d	cold+low light	phyA	0.42 ± 0.06	5.68 ± 1.56	5.94 ± 2.37	3.05 ± 0.77	0.62 ± 0.23	0.16 ± 0.04	11.19 ± 4.11	0.27 ± 0.02	0.15 ± 0.01	1.01 ± 0.22	14.99 ± 2.14	0.25 ± 0.08	10.93 ± 1.60	0.79 ± 0.41	2.04 ± 0.23	6.39 ± 0.59	2.31 ± 0.71	28.35 ± 7.62	1.36 ± 0.40	9.01 ± 1.75	50.47 ± 11.20	1.03 ± 0.19	32.68 ± 4.82	125.53 ± 15.32	4 137.54 ± 2 592.38	41.02 ± 18.84	97.17 ± 13.87	530.43 ± 109.33	64.80 ± 33.97	5 204.14 ± 1 040.83	1.00 ± 0.72	5.18 ± 1.12	1.53 ± 0.47	119.58 ± 31.37	1.65 ± 0.06	122.20 ± 37.27	674.70 ± 266.73	882.26 ± 176.45	397.78 ± 249.45
roots	7 d	cold+low light	phyB	0.79 ± 0.34	7.25 ± 2.93	11.13 ± 3.23	5.49 ± 2.13	1.00 ± 0.30	0.20 ± 0.06	13.57 ± 4.14	0.25 ± 0.08	0.38 ± 0.18	2.03 ± 1.59	18.25 ± 6.31	0.33 ± 0.11	5.28 ± 0.00	0.95 ± 0.73	0.90 ± 0.02	7.96 ± 0.68	2.45 ± 1.24	17.30 ± 2.41	2.12 ± 1.22	10.42 ± 1.59	36.15 ± 4.36	1.54 ± 0.29	45.27 ± 4.92	601.84 ± 84.77	339.76 ± 84.96	23.82 ± 2.13	56.29 ± 5.85	509.79 ± 17.95	130.72 ± 14.57	949.67 ± 160.24	1.56 ± 0.15	5.52 ± 1.27	1.73 ± 0.67	142.51 ± 28.83	1.24 ± 0.42	145.07 ± 54.23	206.48 ± 64.20	57.13 ± 29.60	637.22 ± 189.24

## Sheet: Stat_var
tissue	time	variant	genotype	tZ	tZR	tZ7G	tZ9G	tZOG	tZROG	tZRMP	DZR	cZ	cZR	cZ7G	cZROG	cZRMP	iP	iPR	iP7G	iP9G	iPRMP	CK bases	CK ribosides	CK phosphates	CK O-glucosides	CK N-glucosides	IAA	IAA-Asp	IAA-GE	OxIAA	OxIAA-GE	IAM	IAA metabolites	GA19	ABA	PA	DPA	9OH-ABA	ABA metabolites	JA	JA-Ile	SA
apices	30 min	control	WT	a	a	a	a	ab	ab	ab	a	a	a	a	a	a	a	a	a	a	a	a	a	a	a	a	a	a	a	a	a	a	a	a	a	a	a	a	a	a	a	a
apices	30 min	control	cry1	a	a	ab	ab	ab	a	ab	a	a	a	a	a	a	a	a	ab	a	ab	a	a	ab	a	a	a	a	a	a	a	a	a	a	a	a	a	ab	a	a	ab	a
apices	30 min	control	cry2	a	a	a	a	b	a	a	a	a	a	a	a	a	a	a	a	a	a	a	a	a	a	a	a	a	a	a	a	a	a	a	a	a	a	a	a	a	ab	a
apices	30 min	control	phyA	a	a	a	a	a	a	a	a	a	a	a	a	a	a	a	a	a	a	a	a	a	a	a	a	a	a	a	a	a	a	a	a	a	a	ab	a	a	b	a
apices	30 min	control	phyB	a	a	b	b	ab	b	b	a	a	a	a	a	a	a	a	b	a	b	a	a	b	a	b	a	a	a	a	a	a	a	a	a	a	a	b	a	a	ab	a
apices	30 min	low light	WT	f	fg	f	f	fg	f	f	fg	f	f	f	fg	f	f	fg	f	fg	g	f	f	f	fg	f	g	f	fg	g	fg	f	fg	f	f	f	f	f	fg	g	fg	g
apices	30 min	low light	cry1	f	fg	f	f	f	f	f	fg	f	f	f	g	f	f	fg	fg	fg	fgh	f	f	f	f	f	g	f	fg	g	fg	fg	fg	fg	fg	f	f	f	f	fg	g	fg
apices	30 min	low light	cry2	f	gh	fg	fg	g	f	g	g	f	f	fg	f	f	f	g	f	f	gh	f	fg	f	g	fg	g	f	fg	g	g	fg	g	fg	g	f	f	f	g	fg	fg	fg
apices	30 min	low light	phyA	f	f	f	f	f	f	f	f	f	f	fg	g	f	f	f	f	f	f	f	f	f	f	f	g	f	f	g	f	g	fg	g	f	f	f	f	g	fg	fg	fg
apices	30 min	low light	phyB	f	h	g	g	h	f	h	fg	f	f	g	fg	f	f	h	g	g	h	f	g	g	h	g	f	f	g	f	fg	fg	f	g	f	f	f	f	fg	f	f	f
apices	30 min	cold	WT	k	k	kl	kl	kl	k	k	k	k	k	k	k	k	k	k	k	k	k	k	k	k	k	kl	l	k	k	k	k	k	kl	kl	k	k	l	kl	k	k	k	k
apices	30 min	cold	cry1	k	k	l	kl	kl	k	k	k	k	l	k	m	l	k	k	kl	k	k	k	k	k	kl	l	kl	k	l	k	l	l	l	l	k	k	kl	k	k	k	k	k
apices	30 min	cold	cry2	k	k	k	k	k	k	k	k	k	l	k	l	k	k	k	l	k	kl	k	k	k	k	k	l	k	kl	k	k	l	k	kl	k	k	kl	l	k	k	k	k
apices	30 min	cold	phyA	k	k	kl	kl	k	k	k	k	k	kl	k	kl	k	k	k	kl	k	kl	k	k	k	k	kl	l	k	k	k	kl	k	k	kl	k	k	kl	kl	k	k	k	k
apices	30 min	cold	phyB	k	k	m	l	l	k	k	k	k	kl	k	l	kl	k	l	l	k	l	k	k	k	l	m	k	k	k	k	k	kl	k	k	k	k	k	kl	k	k	k	k
apices	30 min	cold+low light	WT	p	pq	r	q	pqr	pq	pq	p	p	p	q	q	pq	p	pq	pq	p	r	p	p	q	qr	q	p	q	q	p	p	r	p	q	p	pq	q	q	q	q	q	p
apices	30 min	cold+low light	cry1	p	pq	pqr	pq	pq	p	pq	p	p	p	p	p	q	p	pq	pq	p	pqr	p	pq	pq	pq	pq	p	pq	q	q	p	pqr	p	q	p	p	pq	p	p	pq	p	p
apices	30 min	cold+low light	cry2	p	p	p	p	p	p	p	p	p	p	q	p	p	p	p	p	pq	q	p	p	p	p	p	p	pq	p	q	p	p	p	pq	p	pq	p	q	p	pq	p	p
apices	30 min	cold+low light	phyA	p	q	q	q	q	p	q	p	p	p	q	p	q	p	pq	pq	p	p	p	p	p	q	q	p	q	q	q	p	q	p	q	p	q	pq	pq	p	pq	p	p
apices	30 min	cold+low light	phyB	p	q	r	q	r	q	q	p	p	p	q	p	q	p	q	q	q	r	p	q	q	r	q	p	p	p	pq	p	pq	p	p	p	q	pq	q	pq	p	p	p
apices	6 h	control	WT	a	a	a	a	a	a	a	a	a	ab	a	a	a	a	a	a	a	a	a	a	a	a	a	a	a	ab	a	a	a	ab	a	a	a	ab	a	a	a	a	a
apices	6 h	control	cry1	b	ab	ab	ab	a	b	ab	a	ab	a	a	b	a	a	a	a	a	ab	c	ab	ab	a	ab	a	a	b	a	b	a	c	a	ab	b	ab	a	ab	a	a	a
apices	6 h	control	cry2	a	ab	a	a	a	ab	a	a	ab	ab	a	a	a	a	a	a	a	ab	b	ab	ab	a	a	a	a	ab	a	ab	a	abc	a	b	ab	b	a	b	a	a	a
apices	6 h	control	phyA	a	ab	a	a	a	ab	a	a	a	ab	a	a	a	a	a	a	a	ab	ab	ab	a	a	a	a	a	ab	a	a	a	a	a	ab	a	ab	a	ab	a	a	a
apices	6 h	control	phyB	b	b	b	b	a	b	b	a	b	b	a	b	a	a	a	a	a	b	bc	b	b	a	b	a	a	a	a	ab	a	b	a	ab	a	a	a	a	a	a	a
apices	6 h	low light	WT	f	f	f	f	g	f	fg	fg	f	f	f	fg	f	g	g	f	f	fg	f	f	fg	h	f	g	g	f	fg	f	f	f	g	fg	fg	fg	fg	f	g	f	f
apices	6 h	low light	cry1	f	f	fg	fg	fg	f	fg	g	g	f	f	h	f	g	g	f	f	g	f	fg	fg	gh	fg	g	g	g	g	f	fg	f	h	fg	g	f	g	f	g	f	f
apices	6 h	low light	cry2	f	f	f	f	f	f	f	f	fg	f	f	gh	f	f	f	f	f	f	f	f	f	f	f	g	fg	fg	g	f	fg	f	f	fg	fg	f	fg	f	f	f	f
apices	6 h	low light	phyA	f	f	f	f	f	f	fg	fg	f	f	f	f	f	fg	g	f	f	g	f	fg	f	fg	f	g	fg	f	g	f	fg	f	fgh	g	f	g	f	f	fg	f	f
apices	6 h	low light	phyB	f	g	g	g	g	f	g	fg	fg	f	f	h	f	fg	g	g	f	g	f	g	g	h	g	f	f	fg	f	f	g	f	fg	f	fg	f	fg	f	fg	f	f
apices	6 h	cold	WT	k	k	l	l	k	kl	kl	k	k	k	k	kl	kl	k	l	k	k	k	k	k	kl	k	l	k	k	k	k	k	kl	k	k	l	l	l	k	l	k	kl	k
apices	6 h	cold	cry1	k	k	kl	kl	k	k	kl	k	k	k	k	l	kl	k	kl	k	k	k	k	k	kl	kl	kl	k	k	l	k	k	kl	k	k	k	kl	k	k	k	k	kl	k
apices	6 h	cold	cry2	k	k	k	k	k	k	k	k	k	k	k	k	k	k	k	k	k	k	k	k	k	kl	k	k	k	k	k	k	k	k	k	k	k	k	k	k	l	l	k
apices	6 h	cold	phyA	k	k	kl	kl	k	k	kl	k	k	k	k	kl	l	k	kl	k	k	k	k	k	kl	kl	kl	k	k	kl	k	k	k	k	k	kl	kl	kl	k	kl	k	k	k
apices	6 h	cold	phyB	k	k	l	l	k	l	l	k	k	k	k	l	kl	k	l	k	k	k	k	k	l	l	l	k	k	kl	k	k	l	k	k	kl	kl	k	k	kl	kl	k	k
apices	6 h	cold+low light	WT	p	pq	pq	pq	pq	p	p	p	p	p	p	p	p	pq	p	p	p	pq	p	p	pq	pq	p	pq	p	p	p	p	p	p	p	pq	p	p	p	p	p	p	p
apices	6 h	cold+low light	cry1	p	pq	p	p	p	q	p	q	p	q	p	p	q	q	q	p	p	p	pq	pq	p	p	p	pq	p	q	pq	p	p	p	p	pq	p	p	q	p	p	pq	p
apices	6 h	cold+low light	cry2	p	p	p	p	p	q	p	q	p	p	p	p	q	q	q	q	p	pq	q	p	q	p	p	pq	p	q	pq	p	p	p	p	pq	p	p	pq	p	p	q	p
apices	6 h	cold+low light	phyA	p	q	q	q	q	q	q	q	p	q	p	p	q	q	q	q	p	pq	q	q	pqr	q	q	q	p	q	q	p	p	p	p	q	p	p	pq	p	p	pq	p
apices	6 h	cold+low light	phyB	p	pq	q	q	r	q	q	pq	p	p	p	p	pq	p	q	q	p	q	pq	pq	r	q	q	p	p	pq	pq	p	p	p	p	p	p	p	pq	p	p	pq	p
apices	7 d	control	WT	a	ab	a	ab	a	a	a	a	a	ab	a	a	bc	a	ab	a	a	ab	a	a	ab	a	a	a	a	a	a	a	a	a	a	a	a	a	a	a	a	a	a
apices	7 d	control	cry1	a	a	a	a	a	a	a	a	a	ab	a	a	ab	a	a	a	a	a	a	a	b	a	a	a	a	a	a	a	a	a	a	a	a	a	a	a	a	ab	a
apices	7 d	control	cry2	a	a	a	ab	a	a	a	a	a	b	a	a	ab	a	a	a	a	a	a	a	ab	a	a	a	a	a	a	a	a	a	a	a	a	a	a	a	a	ab	a
apices	7 d	control	phyA	a	a	a	ab	a	a	a	a	a	a	a	a	a	a	a	a	a	a	a	a	a	a	a	a	a	a	a	a	a	a	a	a	a	a	a	a	a	ab	a
apices	7 d	control	phyB	a	b	a	b	a	a	a	a	a	ab	a	a	c	a	b	a	a	b	a	b	c	a	a	a	a	a	a	a	a	a	a	a	a	a	a	a	a	b	a
apices	7 d	low light	WT	f	g	g	f	f	f	fg	fg	g	fg	fg	fg	g	f	fgh	f	f	g	f	g	f	f	f	g	fg	fg	g	f	f	f	f	f	f	f	fg	f	f	f	f
apices	7 d	low light	cry1	f	f	fg	f	f	f	f	f	f	g	h	h	f	f	f	f	f	f	f	f	f	f	f	fg	g	g	f	f	f	f	f	f	f	f	f	f	f	h	f
apices	7 d	low light	cry2	f	fg	f	f	f	f	fg	fg	fg	fg	g	g	f	f	fg	f	f	f	f	f	f	f	f	gh	fg	fg	fg	f	f	f	f	f	f	f	f	f	f	g	f
apices	7 d	low light	phyA	f	g	fg	f	f	f	fg	g	fg	f	f	f	fg	f	g	f	f	g	f	g	f	f	f	h	fg	f	g	f	f	f	f	f	f	f	f	f	f	gh	f
apices	7 d	low light	phyB	f	fg	fg	f	f	f	g	fg	fg	fg	fg	fg	fg	f	h	g	f	h	f	h	f	f	f	f	f	fg	f	f	f	f	f	f	g	f	g	f	f	g	f
apices	7 d	cold	WT	k	k	l	klm	k	kl	k	k	k	kl	l	l	k	kl	k	kl	l	kl	k	k	kl	k	kl	k	l	k	l	kl	k	k	l	l	l	k	k	l	l	k	kl
apices	7 d	cold	cry1	k	kl	k	k	k	k	kl	kl	kl	kl	kl	l	k	kl	kl	l	kl	kl	k	kl	kl	k	k	kl	l	k	kl	kl	k	k	kl	k	kl	k	k	kl	kl	k	k
apices	7 d	cold	cry2	k	k	k	l	k	k	k	kl	l	k	k	kl	k	l	k	k	kl	k	k	k	k	k	k	l	m	k	l	l	k	l	l	m	k	k	k	k	m	k	kl
apices	7 d	cold	phyA	k	kl	kl	klm	k	k	kl	kl	kl	kl	k	k	k	l	kl	kl	kl	kl	k	k	k	k	kl	kl	klm	k	kl	kl	k	kl	l	k	kl	k	k	k	kl	k	l
apices	7 d	cold	phyB	k	l	l	m	k	l	l	l	kl	l	k	kl	k	k	l	kl	k	l	k	l	l	k	l	kl	k	k	k	k	k	k	k	k	l	k	k	k	k	k	kl
apices	7 d	cold+low light	WT	p	pq	pq	p	p	p	p	p	p	p	q	q	pq	p	p	q	p	p	p	p	p	p	pq	p	p	pq	p	p	p	p	q	q	q	p	p	q	pq	pq	p
apices	7 d	cold+low light	cry1	p	pq	pq	pq	p	pq	p	p	p	p	p	pq	pq	q	p	p	p	p	q	p	p	p	pq	p	p	q	q	pq	p	p	p	p	p	p	p	p	q	q	p
apices	7 d	cold+low light	cry2	p	pq	p	pq	p	pq	p	p	p	p	pq	pq	p	q	p	pq	p	p	q	p	p	p	p	p	p	pq	pq	pq	p	p	p	pq	pq	p	p	pq	p	p	p
apices	7 d	cold+low light	phyA	p	p	pq	pq	p	q	p	p	p	p	pq	p	q	q	p	pq	p	p	q	p	p	p	pq	p	p	p	pq	pq	p	p	p	pq	p	p	p	pq	p	pq	p
apices	7 d	cold+low light	phyB	p	q	q	q	q	q	p	p	p	p	pq	pq	pq	pq	p	pq	p	p	pq	p	p	p	q	p	p	q	q	q	p	p	p	pq	pq	p	p	p	pq	pq	p
leaves	30 min	control	WT	a	a	a	a	ab	a	a	a	a	a	a	a	a	a	a	a	a	b	a	ab	a	a	a	a	ab	a	a	b	a	ab	a	b	a	b	a	b	a	c	a
leaves	30 min	control	cry1	ab	a	a	a	a	ab	a	a	a	ab	ab	b	a	a	a	b	a	ab	ab	ab	ab	ab	a	a	ab	a	a	b	a	b	a	ab	a	ab	a	a	a	a	a
leaves	30 min	control	cry2	ab	a	a	a	a	a	a	a	a	a	ab	a	a	a	a	ab	a	ab	ab	a	a	a	a	a	ab	a	a	b	a	b	a	ab	a	b	a	b	a	a	a
leaves	30 min	control	phyA	ab	a	a	a	a	a	a	a	a	ab	ab	ab	a	a	a	ab	a	a	ab	a	a	a	a	a	b	a	a	b	a	b	a	ab	a	b	a	ab	a	a	a
leaves	30 min	control	phyB	b	b	b	b	b	b	b	a	a	b	b	ab	a	a	a	c	a	b	b	b	b	b	b	a	a	a	a	a	a	a	a	a	a	a	a	ab	a	b	a
leaves	30 min	low light	WT	f	fg	f	f	f	f	f	f	f	f	f	f	fg	f	g	f	f	g	f	fg	fg	fg	f	f	f	f	h	g	g	g	g	f	g	g	fg	h	h	h	g
leaves	30 min	low light	cry1	f	fg	f	f	f	f	f	f	f	f	f	h	fgh	f	fg	f	f	fg	f	fg	fg	fg	fg	f	f	f	g	g	f	fg	fg	f	f	fg	f	f	g	g	f
leaves	30 min	low light	cry2	f	f	f	f	f	f	f	f	f	f	f	fg	f	f	fg	f	f	fg	f	f	f	f	fg	f	f	f	gh	g	fg	fg	fg	f	fg	g	fg	g	gh	gh	fg
leaves	30 min	low light	phyA	f	f	f	f	fg	f	f	f	f	fg	f	gh	gh	f	f	f	f	f	f	f	f	g	g	f	f	f	h	g	g	g	g	f	g	g	g	h	f	f	fg
leaves	30 min	low light	phyB	f	g	g	g	g	g	g	f	f	g	f	h	h	f	g	g	f	g	f	g	g	h	h	f	f	f	f	f	g	f	f	f	f	f	f	fg	h	i	f
leaves	30 min	cold	WT	k	k	kl	kl	kl	kl	k	k	k	k	kl	k	k	l	k	kl	k	l	k	k	l	kl	k	m	l	k	m	m	k	m	k	l	l	l	l	m	k	m	l
leaves	30 min	cold	cry1	k	k	k	k	k	kl	k	k	k	l	k	l	k	k	k	k	k	k	k	k	k	k	k	k	kl	k	l	l	k	lm	k	k	k	k	k	k	k	l	k
leaves	30 min	cold	cry2	k	k	k	k	k	k	k	k	k	l	k	kl	k	kl	k	k	k	k	k	k	kl	k	k	l	kl	k	m	lm	k	lm	k	kl	kl	l	kl	lm	k	kl	kl
leaves	30 min	cold	phyA	k	k	k	kl	k	k	k	k	k	kl	kl	k	k	kl	k	k	k	kl	k	k	kl	k	k	lm	kl	k	m	lm	k	l	k	kl	kl	l	kl	m	k	l	kl
leaves	30 min	cold	phyB	k	k	l	l	l	l	k	k	k	l	l	kl	k	kl	k	l	k	l	k	k	l	l	l	k	k	k	k	k	k	k	k	kl	kl	kl	kl	kl	k	k	kl
leaves	30 min	cold+low light	WT	p	pq	q	q	p	p	p	p	p	p	p	q	p	p	p	pq	p	p	p	p	p	p	q	p	q	p	q	q	p	q	p	q	q	q	p	q	p	p	p
leaves	30 min	cold+low light	cry1	p	pq	pq	pq	p	p	pq	p	p	q	p	q	p	p	p	pq	p	p	p	p	p	q	pq	p	pq	q	q	q	p	q	p	pq	pq	q	p	p	p	q	p
leaves	30 min	cold+low light	cry2	p	p	p	p	p	p	p	p	p	pq	p	pq	p	p	p	p	p	p	p	p	p	p	p	p	p	p	q	q	p	q	p	p	pq	q	p	pq	p	q	p
leaves	30 min	cold+low light	phyA	p	q	pq	pq	p	p	q	p	p	pq	p	p	p	p	p	p	p	p	p	p	p	p	pq	p	p	p	q	q	p	q	p	pq	pq	pq	p	pq	p	q	p
leaves	30 min	cold+low light	phyB	p	r	q	r	q	p	q	p	p	q	p	pq	p	p	q	q	p	q	p	q	q	q	r	p	p	p	p	p	p	p	p	p	p	p	p	p	p	q	p
leaves	6 h	control	WT	a	a	a	a	a	a	a	a	a	a	a	a	a	a	a	a	a	a	a	a	a	a	a	a	a	a	b	b	a	b	a	ab	a	a	a	bc	a	b	b
leaves	6 h	control	cry1	ab	a	a	a	a	b	a	a	ab	a	ab	b	a	a	a	a	a	a	a	a	a	b	a	a	a	a	ab	b	a	b	a	ab	a	a	a	ab	a	ab	a
leaves	6 h	control	cry2	ab	a	a	ab	a	ab	a	a	ab	a	ab	ab	a	a	a	a	a	a	ab	a	a	ab	a	a	a	a	b	b	a	b	a	b	a	a	a	c	a	a	ab
leaves	6 h	control	phyA	ab	ab	a	a	a	ab	a	a	ab	a	b	ab	a	a	a	a	a	a	ab	a	a	b	a	a	a	a	b	b	a	b	a	a	a	a	a	bc	a	a	a
leaves	6 h	control	phyB	b	b	b	b	b	c	b	a	b	a	b	ab	a	a	b	b	a	b	b	b	b	c	b	a	a	a	a	a	a	a	a	a	a	a	a	a	a	ab	ab
leaves	6 h	low light	WT	fg	f	f	f	f	f	f	fg	fg	fg	f	f	fg	f	g	fg	f	f	fg	f	f	f	f	g	gh	f	g	g	f	g	f	g	gh	fg	h	h	fg	f	f
leaves	6 h	low light	cry1	gh	f	f	f	f	f	f	fg	g	fg	f	g	g	f	fg	g	f	f	fg	f	f	g	f	g	fg	g	f	g	f	fg	f	fg	f	fg	g	fg	g	g	f
leaves	6 h	low light	cry2	gh	f	f	f	f	f	f	f	fg	f	f	f	f	f	fg	f	f	f	fg	f	f	f	f	g	fgh	fg	g	g	f	g	f	fg	fg	g	gh	gh	f	f	f
leaves	6 h	low light	phyA	f	f	f	f	f	f	f	f	f	f	f	f	f	f	f	f	f	f	f	f	f	f	f	g	h	f	g	g	f	g	f	g	h	fg	h	h	fg	f	f
leaves	6 h	low light	phyB	h	g	g	g	g	g	g	g	g	g	f	fg	h	f	h	h	f	g	g	g	g	g	g	f	f	f	f	f	f	f	f	f	f	f	f	f	g	g	f
leaves	6 h	cold	WT	k	k	l	k	kl	kl	k	k	k	k	k	k	kl	k	l	k	k	kl	k	l	l	kl	l	l	l	kl	lm	m	l	l	l	k	l	l	l	m	k	l	k
leaves	6 h	cold	cry1	k	k	kl	kl	k	k	k	k	k	k	k	l	l	k	kl	kl	kl	k	kl	kl	kl	kl	kl	kl	l	l	l	l	k	l	kl	k	k	kl	k	l	k	k	k
leaves	6 h	cold	cry2	k	k	k	k	k	k	kl	k	k	k	k	k	k	k	kl	k	l	k	kl	kl	kl	k	k	kl	kl	k	lm	lm	kl	l	kl	k	kl	kl	kl	lm	k	kl	k
leaves	6 h	cold	phyA	k	k	kl	kl	k	kl	k	k	k	k	k	kl	kl	k	k	kl	kl	k	l	k	k	k	kl	kl	l	kl	m	lm	kl	l	kl	k	l	l	kl	m	k	k	k
leaves	6 h	cold	phyB	k	k	l	l	l	l	l	k	k	k	k	kl	l	k	l	l	kl	l	kl	l	m	l	l	k	k	kl	k	k	kl	k	k	k	kl	k	kl	k	k	k	k
leaves	6 h	cold+low light	WT	p	p	p	pq	p	p	pq	p	p	p	p	pq	pq	p	pq	pq	p	p	p	pq	p	p	p	pq	q	pq	q	q	p	q	p	p	q	q	p	q	p	q	p
leaves	6 h	cold+low light	cry1	p	p	p	p	p	p	p	p	p	p	p	q	pq	p	pq	pq	p	p	pq	pq	p	p	p	pq	pq	q	pq	q	p	q	p	p	p	p	p	p	p	q	p
leaves	6 h	cold+low light	cry2	p	p	pq	q	p	p	pq	p	p	p	p	q	q	p	q	pq	p	q	q	q	q	pq	pq	pq	pq	pq	pq	q	p	q	p	p	q	q	p	q	p	r	p
leaves	6 h	cold+low light	phyA	p	p	q	q	p	p	q	p	p	p	p	p	p	p	p	p	p	p	pq	p	pq	p	q	q	pq	p	pq	q	p	q	p	p	q	pq	p	p	p	p	p
leaves	6 h	cold+low light	phyB	p	p	r	r	q	p	r	p	p	p	p	pq	q	p	q	q	p	q	pq	q	r	q	r	p	p	pq	p	p	p	p	p	p	pq	p	p	p	p	qr	p
leaves	7 d	control	WT	ab	ab	ab	ab	ab	ab	ab	a	a	a	a	ab	a	a	ab	a	a	a	ab	ab	ab	ab	ab	a	bc	ab	c	b	a	a	a	a	a	b	a	d	a	b	a
leaves	7 d	control	cry1	a	a	a	a	a	a	a	a	a	a	a	b	a	a	a	ab	a	a	a	a	a	a	a	a	ab	ab	b	b	a	a	a	a	a	a	a	a	a	b	a
leaves	7 d	control	cry2	ab	a	a	ab	a	a	a	a	a	a	a	a	a	a	a	ab	a	a	ab	a	a	a	a	a	c	a	bc	b	a	a	a	a	a	b	a	cd	a	a	a
leaves	7 d	control	phyA	ab	ab	ab	bc	ab	ab	ab	a	a	a	a	ab	a	a	ab	ab	a	ab	ab	ab	ab	ab	ab	a	c	b	bc	b	a	a	a	a	a	b	a	bc	a	b	a
leaves	7 d	control	phyB	b	b	b	c	b	b	b	a	a	a	a	ab	a	a	b	b	a	b	b	b	b	b	b	a	a	ab	a	a	a	a	a	a	a	ab	a	ab	a	b	a
leaves	7 d	low light	WT	f	f	f	f	f	g	f	f	f	f	f	f	f	f	f	f	f	f	f	f	fg	fg	f	f	g	f	gh	gh	f	g	f	f	f	fg	f	fg	f	h	f
leaves	7 d	low light	cry1	f	f	f	f	f	fg	f	f	f	f	f	g	f	f	f	f	fg	f	f	f	fg	gh	f	f	g	f	fg	g	f	g	f	f	f	f	f	f	f	f	f
leaves	7 d	low light	cry2	f	f	f	f	f	f	f	f	f	f	f	f	f	f	f	f	f	f	f	f	f	f	f	f	g	f	h	gh	f	g	f	f	f	fg	f	g	f	fg	f
leaves	7 d	low light	phyA	fg	f	f	f	f	fg	f	f	f	f	f	f	f	f	f	f	f	f	f	f	fg	fg	f	f	g	f	h	h	f	g	f	f	f	g	f	g	f	f	f
leaves	7 d	low light	phyB	g	g	g	g	g	g	g	f	f	f	f	fg	f	f	f	g	g	f	f	f	g	h	g	f	f	f	f	f	f	f	f	f	f	fg	f	f	f	gh	f
leaves	7 d	cold	WT	k	k	kl	k	k	kl	k	kl	k	k	k	kl	k	k	k	k	k	k	k	k	kl	k	k	k	l	k	l	lm	k	l	k	k	l	kl	k	k	kl	l	kl
leaves	7 d	cold	cry1	k	lm	k	k	k	kl	k	kl	k	k	k	l	k	k	k	k	k	k	l	lm	l	k	k	k	l	k	kl	l	k	kl	k	kl	kl	k	k	k	kl	l	k
leaves	7 d	cold	cry2	k	l	kl	k	k	kl	k	kl	k	k	k	kl	k	k	k	kl	k	k	kl	l	l	k	k	k	l	k	kl	m	k	l	k	kl	kl	kl	k	k	l	m	kl
leaves	7 d	cold	phyA	k	k	kl	k	k	k	k	k	k	k	k	k	k	k	k	kl	k	k	k	k	k	k	k	k	kl	k	l	lm	k	l	k	l	k	l	k	k	l	l	l
leaves	7 d	cold	phyB	k	m	l	l	k	l	k	l	k	k	k	kl	k	k	k	l	k	k	kl	m	l	k	l	k	k	k	k	k	k	k	k	kl	kl	kl	k	k	k	k	kl
leaves	7 d	cold+low light	WT	p	pq	q	p	p	p	p	pq	p	p	q	q	q	p	p	pq	p	p	p	p	p	pq	p	q	q	pq	q	q	q	p	q	p	p	q	p	q	p	pq	q
leaves	7 d	cold+low light	cry1	p	p	pq	p	p	p	p	p	p	p	pq	q	pq	p	p	p	p	pq	p	p	p	q	p	pq	pq	q	pq	pq	pq	p	p	p	p	p	p	pq	p	r	p
leaves	7 d	cold+low light	cry2	p	p	p	p	p	p	p	p	p	p	p	p	p	p	p	pq	p	pq	p	p	p	p	p	q	q	p	q	q	p	p	pq	p	p	pq	p	p	p	p	pq
leaves	7 d	cold+low light	phyA	p	pq	pq	p	p	p	p	p	p	p	pq	p	p	p	p	p	p	q	p	p	p	pq	p	pq	pq	p	pq	q	pq	p	pq	p	p	q	p	q	p	q	pq
leaves	7 d	cold+low light	phyB	p	q	r	q	q	q	p	q	p	p	pq	pq	pq	p	p	q	p	pq	p	p	p	r	q	p	p	p	p	p	pq	p	pq	p	p	pq	p	p	p	pq	pq
roots	30 min	control	WT	a	ab	a	a	a	a	ab	a	a	a	a	a	a	a	a	a	ab	a	a	ab	a	a	a	a	a	a	ab	a	a	a	a	b	b	b	a	a	a	b	a
roots	30 min	control	cry1	a	b	a	a	a	a	ab	a	a	a	a	a	a	a	ab	ab	b	a	a	b	a	a	a	a	a	a	ab	a	a	a	a	ab	ab	ab	bc	a	a	a	a
roots	30 min	control	cry2	a	ab	a	a	a	a	ab	a	a	a	a	a	a	a	b	b	ab	a	a	ab	a	a	a	a	a	a	ab	a	b	a	a	a	ab	ab	abc	a	a	ab	a
roots	30 min	control	phyA	a	a	a	a	a	a	a	a	a	a	a	a	a	a	ab	ab	ab	a	a	a	a	a	a	a	a	a	b	a	ab	a	a	b	ab	ab	c	a	a	c	a
roots	30 min	control	phyB	a	ab	a	a	a	a	b	a	a	a	a	a	a	a	ab	a	a	a	a	ab	a	a	a	a	a	a	a	a	a	a	a	ab	a	a	ab	a	a	d	a
roots	30 min	low light	WT	f	fg	fg	fg	fg	g	fgh	f	fg	f	h	fg	f	fg	fg	h	f	fg	fg	f	f	fg	h	fg	fg	h	h	h	f	h	h	g	f	g	g	g	g	i	gh
roots	30 min	low light	cry1	f	fg	fg	g	fg	g	fg	fg	g	f	gh	h	fg	fg	fg	fgh	f	fg	fg	f	fg	fg	h	g	g	g	h	h	f	h	g	fg	f	fg	fg	g	fg	f	h
roots	30 min	low light	cry2	f	f	f	f	fg	f	f	f	f	f	f	f	fg	f	f	f	f	g	f	f	f	f	f	fg	fg	f	g	fg	f	g	gh	f	f	f	fg	fg	f	f	g
roots	30 min	low light	phyA	f	f	g	fg	g	g	gh	fg	g	f	gh	gh	g	fg	g	gh	f	f	fg	f	g	g	gh	fg	f	g	h	gh	f	g	f	f	f	fg	f	g	g	h	f
roots	30 min	low light	phyB	f	g	f	f	f	g	h	g	g	f	fg	fgh	g	g	g	fg	f	g	g	g	g	f	fg	f	f	f	f	f	f	f	gh	f	f	f	fg	f	f	g	f
roots	30 min	cold	WT	k	kl	kl	l	k	kl	kl	k	k	k	m	k	kl	k	kl	kl	l	kl	k	k	kl	k	l	k	k	k	k	kl	l	k	kl	kl	l	l	l	l	k	k	k
roots	30 min	cold	cry1	k	l	k	k	k	k	kl	k	k	k	k	k	k	k	l	k	kl	l	k	l	k	k	k	k	k	k	k	k	k	k	k	k	k	kl	k	k	k	k	m
roots	30 min	cold	cry2	k	l	l	m	k	l	k	k	k	k	l	k	kl	k	k	l	l	k	k	kl	k	k	l	k	k	k	k	l	kl	k	l	l	l	kl	k	k	k	k	kl
roots	30 min	cold	phyA	k	k	kl	kl	k	kl	l	k	k	k	lm	k	kl	k	kl	l	kl	klm	k	k	kl	k	l	k	k	k	k	kl	k	k	k	kl	l	kl	k	k	k	k	lm
roots	30 min	cold	phyB	k	kl	kl	l	k	kl	kl	k	k	k	lm	k	l	k	m	l	k	m	k	kl	l	k	l	k	k	k	k	kl	k	k	kl	kl	l	k	kl	kl	k	k	l
roots	30 min	cold+low light	WT	p	p	pq	p	p	p	p	p	p	p	p	p	p	pq	p	p	pq	pq	p	p	p	p	p	p	pq	p	q	p	p	q	p	pqr	p	r	r	r	q	r	p
roots	30 min	cold+low light	cry1	p	p	pq	pqr	q	p	p	p	p	p	p	p	p	pq	p	pq	pq	pq	p	p	p	p	p	p	q	p	p	p	p	q	p	pqr	p	pq	q	pq	pq	q	q
roots	30 min	cold+low light	cry2	p	p	pq	pq	pq	p	p	p	p	p	p	p	p	pq	p	q	p	pq	p	p	p	p	p	p	p	p	pq	p	p	p	p	p	p	pq	pq	q	pq	qr	pq
roots	30 min	cold+low light	phyA	p	pq	q	r	pq	p	p	p	p	p	p	p	p	p	p	pq	pq	p	p	p	p	p	p	p	pq	p	p	p	p	q	p	pq	p	p	pqr	p	p	p	pq
roots	30 min	cold+low light	phyB	p	q	p	q	p	p	p	p	p	p	p	p	p	q	p	pq	q	q	p	p	p	p	p	p	pq	p	pq	p	p	pq	p	r	p	pq	p	pq	pq	p	pq
roots	6 h	control	WT	a	ab	a	a	a	a	a	a	a	a	a	a	ab	a	ab	a	b	ab	a	a	ab	a	a	a	a	a	a	a	a	a	a	b	b	b	a	a	a	c	a
roots	6 h	control	cry1	a	a	a	a	a	a	a	a	b	a	a	a	ab	a	ab	a	ab	ab	a	a	a	ab	a	a	a	a	ab	a	a	a	a	ab	ab	a	a	a	a	a	a
roots	6 h	control	cry2	a	a	a	a	a	a	a	a	b	a	a	a	a	a	a	a	ab	a	a	a	a	ab	a	a	a	a	b	a	a	a	a	ab	ab	ab	a	a	a	ab	a
roots	6 h	control	phyA	a	ab	a	a	a	a	a	a	ab	a	a	a	ab	a	a	a	ab	a	a	a	a	ab	a	a	a	a	ab	a	a	a	a	a	a	a	a	a	a	a	a
roots	6 h	control	phyB	a	b	a	a	a	b	a	a	b	a	a	a	b	a	b	a	a	b	a	b	b	b	a	a	a	a	ab	a	a	a	a	ab	ab	ab	a	a	a	bc	a
roots	6 h	low light	WT	g	g	g	f	f	h	g	g	f	g	h	g	g	g	g	g	g	f	g	g	g	fg	g	gh	h	g	h	h	h	i	g	h	f	g	f	g	h	h	f
roots	6 h	low light	cry1	g	fg	fg	f	f	fg	g	fg	f	g	g	fg	i	fg	fg	f	f	f	fg	fg	i	fg	g	h	fg	f	fg	f	fg	g	g	gh	f	f	g	f	gh	i	i
roots	6 h	low light	cry2	f	f	f	f	f	f	g	fg	f	f	f	f	h	f	f	f	f	f	f	f	h	f	f	f	f	f	f	f	f	f	f	f	f	f	f	fg	f	f	g
roots	6 h	low light	phyA	g	f	f	f	f	h	f	f	f	fg	gh	fg	f	f	f	fg	f	f	f	f	f	fg	g	g	g	fg	g	g	gh	h	g	fgh	f	fg	fg	g	h	g	h
roots	6 h	low light	phyB	fg	f	fg	f	f	gh	g	fg	f	f	g	fg	h	f	fg	f	f	f	f	f	h	g	g	gh	fg	f	fg	f	g	gh	g	g	f	f	g	fg	g	g	j
roots	6 h	cold	WT	l	k	l	k	l	kl	k	kl	k	k	l	kl	kl	k	kl	kl	l	kl	k	kl	kl	k	k	l	kl	k	k	k	k	kl	k	k	l	l	k	l	k	l	l
roots	6 h	cold	cry1	kl	kl	kl	k	k	kl	k	kl	k	k	kl	k	k	k	k	kl	kl	k	k	kl	k	k	k	kl	k	k	lm	kl	k	l	k	k	k	kl	k	k	k	k	kl
roots	6 h	cold	cry2	l	k	k	k	kl	k	k	k	k	k	l	kl	kl	k	k	l	l	k	k	k	kl	k	k	k	kl	k	m	l	k	l	k	k	k	l	k	kl	k	l	l
roots	6 h	cold	phyA	k	kl	kl	k	k	l	k	kl	k	k	l	l	kl	k	kl	kl	kl	l	k	k	l	k	k	kl	kl	k	l	k	k	k	k	k	k	k	k	k	k	k	k
roots	6 h	cold	phyB	kl	l	kl	k	kl	kl	k	l	k	k	k	kl	l	k	l	k	k	kl	k	l	l	k	k	l	l	k	klm	k	k	kl	k	k	kl	kl	k	kl	k	m	kl
roots	6 h	cold+low light	WT	p	pq	p	p	p	p	pq	p	p	p	q	p	p	p	pq	pq	p	p	p	pq	p	p	p	pq	r	p	q	p	p	s	p	p	p	q	p	q	q	s	p
roots	6 h	cold+low light	cry1	p	pq	p	p	p	q	pq	p	p	p	pq	p	p	p	pq	pq	p	p	p	pq	p	p	p	p	pq	p	p	p	p	q	p	p	p	p	p	p	pq	p	p
roots	6 h	cold+low light	cry2	p	p	p	p	p	pq	p	p	p	p	pq	p	p	p	p	q	p	p	p	p	p	p	p	pq	pqr	p	pq	p	p	p	p	p	p	p	p	p	pq	r	p
roots	6 h	cold+low light	phyA	p	q	p	p	p	pq	q	p	p	p	pq	p	p	p	q	q	p	p	p	pq	p	p	p	q	p	p	p	p	p	q	p	p	p	p	p	p	pq	q	p
roots	6 h	cold+low light	phyB	p	q	p	p	p	pq	q	p	p	p	p	p	p	p	q	p	p	p	p	q	p	p	p	pq	pqr	p	pq	p	p	r	p	p	p	pq	p	pq	p	p	p
roots	7 d	control	WT	a	a	a	a	a	a	a	a	a	a	a	a	a	a	a	a	a	a	a	a	a	a	b	a	a	a	ab	ab	ab	bc	a	a	a	a	a	a	a	a	b
roots	7 d	control	cry1	a	b	a	a	a	a	a	a	a	a	a	a	a	a	a	a	a	a	a	a	a	a	ab	a	a	a	ab	ab	ab	a	a	a	a	a	a	a	a	c	ab
roots	7 d	control	cry2	a	ab	a	a	a	a	a	a	a	a	a	a	a	a	a	a	a	a	a	a	a	a	a	a	a	a	ab	b	b	c	a	a	a	a	a	a	a	b	ab
roots	7 d	control	phyA	a	ab	a	a	a	a	a	a	a	a	a	a	a	a	a	a	a	a	a	a	a	a	ab	a	a	a	b	ab	ab	abc	a	a	a	a	a	a	a	b	b
roots	7 d	control	phyB	a	b	a	a	a	a	a	a	a	a	a	a	a	a	a	a	a	a	a	a	a	a	ab	a	a	a	a	a	a	ab	a	a	a	a	a	a	a	a	a
roots	7 d	low light	WT	f	f	f	fg	f	f	fg	f	f	g	f	f	f	f	g	f	f	g	f	g	h	f	f	fg	f	f	f	f	f	f	f	f	f	g	f	f	g	i	fg
roots	7 d	low light	cry1	f	f	f	f	f	f	f	f	f	fg	f	f	f	f	fg	f	fg	f	f	fg	fg	f	f	g	f	f	f	f	f	g	fg	fg	f	f	f	f	fg	h	g
roots	7 d	low light	cry2	f	f	f	fg	f	f	fg	f	f	fg	f	fg	f	f	f	f	g	f	f	fg	f	f	f	fg	f	f	f	f	f	g	g	g	f	fg	f	f	g	f	fg
roots	7 d	low light	phyA	f	f	f	g	f	f	fg	f	f	f	f	f	f	f	fg	f	fg	fg	f	f	g	f	f	f	f	f	f	f	f	fg	fg	fg	f	g	f	f	f	g	f
roots	7 d	low light	phyB	f	f	f	fg	f	f	g	f	f	f	f	g	f	f	fg	f	g	fg	f	fg	fgh	f	f	fg	f	f	f	f	f	g	g	f	f	g	f	f	fg	g	fg
roots	7 d	cold	WT	lm	k	k	k	kl	k	k	k	l	k	l	k	k	klm	k	kl	m	kl	l	kl	kl	kl	k	kl	l	k	kl	kl	l	m	k	kl	l	kl	kl	kl	klm	k	k
roots	7 d	cold	cry1	k	kl	k	k	l	k	k	k	k	k	l	k	kl	k	klm	kl	m	l	k	kl	k	kl	k	l	l	k	k	k	k	l	k	k	k	kl	kl	lm	m	n	k
roots	7 d	cold	cry2	lm	l	k	k	l	k	k	kl	l	k	kl	k	l	kl	l	k	k	kl	kl	l	k	kl	k	k	kl	k	kl	kl	kl	l	k	kl	l	k	k	klm	l	kl	k
roots	7 d	cold	phyA	l	kl	k	k	k	k	k	l	l	k	kl	k	kl	l	kl	l	m	k	l	k	k	k	k	l	kl	l	kl	l	l	l	k	l	l	kl	l	k	k	lm	k
roots	7 d	cold	phyB	m	l	k	k	l	k	k	l	l	k	k	k	m	m	m	kl	l	l	l	l	l	l	k	kl	k	kl	l	kl	l	k	k	l	l	l	l	m	klm	m	k
roots	7 d	cold+low light	WT	q	p	pq	p	pq	p	pq	pq	pq	q	p	p	q	q	pq	p	pq	pq	q	q	q	pq	pq	pq	r	pq	p	q	pqr	rs	q	p	p	q	pq	p	pq	s	pq
roots	7 d	cold+low light	cry1	pq	p	p	pq	pq	p	p	p	pq	pq	p	p	pq	pq	pq	pq	pq	p	pq	pq	p	pq	p	q	q	p	p	pq	r	qr	pq	pq	pq	p	q	p	p	r	p
roots	7 d	cold+low light	cry2	p	p	pq	pq	q	p	pq	pq	p	p	p	p	p	p	p	q	q	pq	p	p	p	q	pq	pq	pq	q	pq	q	pqr	q	q	q	q	q	pq	p	p	q	pq
roots	7 d	cold+low light	phyA	q	p	q	q	pq	p	q	q	q	q	p	p	r	pq	q	pq	p	pq	q	q	qr	q	q	r	p	p	p	pq	q	p	pq	q	q	pq	p	p	p	p	q
roots	7 d	cold+low light	phyB	pq	p	pq	pq	p	p	pq	q	q	q	p	p	s	pq	r	p	pq	q	pq	q	r	p	p	p	r	pq	q	p	p	s	p	q	q	pq	pq	p	q	t	pq

## Sheet: Stat_gen
tissue	time	genotype	variant	tZ	tZR	tZ7G	tZ9G	tZOG	tZROG	tZRMP	DZR	cZ	cZR	cZ7G	cZROG	cZRMP	iP	iPR	iP7G	iP9G	iPRMP	CK bases	CK ribosides	CK phosphates	CK O-glucosides	CK N-glucosides	IAA	IAA-Asp	IAA-GE	OxIAA	OxIAA-GE	IAM	IAA metabolites	GA19	ABA	PA	DPA	9OH-ABA	ABA metabolites	JA	JA-Ile	SA
apices	30 min	WT	control	A	B	A	A	AB	B	B	A	A	A	A	B	A	A	A	A	B	A	A	A	A	A	A	A	A	A	B	A	A	A	A	A	AB	A	A	AB	A	A	A
apices	30 min	WT	low light	A	AB	A	A	A	AB	AB	B	A	A	A	AB	A	A	AB	A	AB	A	A	A	A	A	A	A	A	A	B	AB	A	A	A	A	A	A	A	A	A	B	A
apices	30 min	WT	cold	A	A	A	A	A	A	A	A	A	A	A	A	A	B	AB	A	AB	A	A	A	A	A	A	A	A	A	B	AB	A	A	A	A	B	AB	A	AB	A	AB	A
apices	30 min	WT	cold+low light	A	AB	B	A	B	AB	B	AB	A	A	A	C	A	A	B	A	A	B	A	A	B	B	B	A	A	B	A	B	B	A	A	A	AB	B	A	B	A	B	A
apices	30 min	cry1	control	F	E	E	E	E	E	E	E	F	EF	F	EF	E	E	E	E	E	E	E	E	E	E	E	EF	F	E	E	E	EF	E	E	E	F	E	F	E	E	E	E
apices	30 min	cry1	low light	EF	E	E	E	E	E	E	F	EF	E	EF	F	E	EF	E	E	E	E	E	E	E	E	E	F	EF	E	E	EF	E	EF	E	E	F	E	F	E	E	F	E
apices	30 min	cry1	cold	EF	E	E	E	E	E	E	F	E	F	F	F	F	EF	E	E	E	E	E	E	E	E	E	E	F	F	E	F	F	F	E	E	F	E	F	E	E	EF	E
apices	30 min	cry1	cold+low light	E	E	E	E	E	E	E	EF	EF	EF	E	E	E	F	E	E	E	E	E	E	E	E	E	EF	E	G	E	F	EF	EF	E	E	E	E	E	E	E	E	E
apices	30 min	cry2	control	J	IJ	J	J	JK	I	I	I	J	I	I	IJ	IJ	I	I	I	I	I	I	IJ	I	J	J	I	I	I	I	I	I	I	I	IJ	I	I	I	I	J	IJ	I
apices	30 min	cry2	low light	IJ	J	J	J	K	I	J	K	IJ	I	I	I	IJ	I	IJ	I	I	J	I	J	J	J	IJ	I	I	I	I	IJ	I	I	I	J	I	I	I	I	IJ	IJ	I
apices	30 min	cry2	cold	IJ	J	I	IJ	I	I	I	J	IJ	I	I	J	J	I	IJ	I	I	IJ	I	IJ	IJ	I	I	I	I	I	I	I	I	I	I	IJ	I	I	I	I	J	J	I
apices	30 min	cry2	cold+low light	I	I	I	I	J	I	I	IJ	I	I	I	I	I	I	J	I	I	J	I	I	I	J	I	I	I	I	I	J	I	I	I	I	I	I	I	I	I	I	I
apices	30 min	phyA	control	N	MN	MN	MN	M	M	M	M	M	M	M	MN	M	N	MN	M	M	M	N	MN	M	M	MN	M	M	M	M	M	MN	M	M	MN	M	M	M	M	N	N	M
apices	30 min	phyA	low light	M	M	M	M	M	M	M	M	M	M	M	N	M	M	M	M	M	M	M	M	M	M	M	M	M	M	M	M	N	M	M	M	M	M	M	M	MN	N	M
apices	30 min	phyA	cold	MN	MN	M	MN	M	M	M	M	M	M	M	M	M	MN	N	M	M	M	MN	MN	M	M	MN	M	M	MN	M	M	M	M	M	N	M	M	M	M	N	N	M
apices	30 min	phyA	cold+low light	MN	N	N	N	N	M	N	M	M	M	M	MN	M	N	N	M	M	M	MN	N	M	N	N	M	M	N	M	M	N	M	M	MN	M	M	M	M	M	M	M
apices	30 min	phyB	control	Q	Q	Q	Q	Q	Q	Q	Q	R	Q	Q	Q	Q	Q	Q	R	Q	Q	R	Q	Q	QR	Q	R	R	Q	R	Q	Q	QR	RS	Q	Q	Q	Q	Q	QR	Q	Q
apices	30 min	phyB	low light	Q	Q	Q	Q	Q	QR	R	Q	QR	Q	Q	Q	Q	Q	Q	Q	Q	QR	Q	Q	R	R	Q	Q	Q	R	Q	Q	Q	Q	S	Q	Q	Q	Q	Q	QR	Q	Q
apices	30 min	phyB	cold	Q	Q	Q	Q	Q	Q	Q	Q	R	Q	Q	Q	Q	Q	QR	QR	Q	QR	Q	Q	QR	Q	Q	QR	R	QR	QR	Q	Q	R	R	Q	Q	Q	Q	Q	R	Q	Q
apices	30 min	phyB	cold+low light	Q	Q	Q	Q	R	R	QR	Q	Q	Q	Q	Q	Q	Q	R	QR	Q	R	Q	Q	QR	R	Q	Q	Q	QR	QR	Q	Q	R	Q	Q	Q	Q	Q	Q	Q	Q	Q
apices	6 h	WT	control	A	A	A	A	A	B	A	AB	A	AB	AB	B	B	A	A	A	A	A	A	A	A	A	A	A	A	AB	A	A	B	A	A	A	A	A	A	A	A	A	A
apices	6 h	WT	low light	B	B	A	A	A	B	B	B	A	A	A	A	A	B	C	A	A	B	B	B	B	A	A	B	A	B	AB	A	A	AB	A	B	AB	A	AB	A	B	B	A
apices	6 h	WT	cold	B	B	A	A	A	B	B	AB	B	B	B	AB	B	A	C	A	A	B	B	B	B	A	A	B	A	B	B	A	AB	B	A	B	B	B	B	B	AB	AB	A
apices	6 h	WT	cold+low light	B	B	A	A	A	A	AB	A	AB	B	AB	AB	B	A	B	A	A	B	AB	B	B	A	A	B	A	A	A	A	AB	AB	A	AB	B	AB	AB	AB	A	A	A
apices	6 h	cry1	control	E	E	E	E	E	E	E	E	E	E	F	F	EF	E	E	E	F	E	E	E	E	E	E	E	E	E	E	E	E	E	EF	E	E	E	E	E	E	E	E
apices	6 h	cry1	low light	E	F	E	E	E	E	E	F	E	E	E	E	E	E	F	E	EF	F	E	F	EF	E	E	E	E	E	E	E	E	E	F	F	E	E	E	E	F	F	E
apices	6 h	cry1	cold	E	EF	E	E	E	E	E	EF	E	F	F	EF	F	E	F	E	EF	F	E	F	EF	E	E	E	E	E	E	E	E	E	EF	EF	E	E	E	E	E	EF	E
apices	6 h	cry1	cold+low light	E	F	E	E	E	E	E	EF	E	F	EF	EF	F	E	F	E	E	F	E	F	F	E	E	E	E	E	E	E	E	E	E	EF	E	E	E	E	E	EF	E
apices	6 h	cry2	control	I	I	IJ	IJ	IJ	IJ	I	I	IJ	J	I	I	J	IJ	I	I	I	I	I	I	I	IJ	IJ	I	IJ	IJ	IJ	I	J	I	IJ	J	I	J	I	I	I	I	I
apices	6 h	cry2	low light	J	J	I	IJ	I	J	J	I	I	I	I	I	I	I	J	I	I	J	J	JK	J	I	I	I	I	J	I	IJ	IJ	I	I	IJ	I	I	IJ	I	IJ	I	I
apices	6 h	cry2	cold	IJ	IJ	I	I	IJ	I	I	I	IJ	J	I	I	J	J	J	I	I	J	IJ	J	J	IJ	I	I	IJ	I	J	I	I	I	IJ	I	I	IJ	J	I	K	K	I
apices	6 h	cry2	cold+low light	J	J	J	J	J	J	J	J	J	J	I	II	K	J	K	I	I	K	J	K	K	J	J	I	J	J	IJ	J	IJ	J	J	J	I	J	IJ	I	J	J	I
apices	6 h	phyA	control	M	M	M	MN	MN	M	M	M	M	MN	MN	N	M	M	M	M	M	M	M	M	M	MN	M	M	M	M	M	M	M	M	M	M	M	M	M	M	M	M	M
apices	6 h	phyA	low light	MN	N	M	M	M	M	MN	N	MN	M	M	M	M	M	N	M	M	N	N	N	N	M	M	N	M	M	M	MN	M	MN	M	N	MN	M	MN	N	M	M	MN
apices	6 h	phyA	cold	M	N	M	M	M	M	MN	MN	N	N	N	N	N	M	N	M	M	N	N	MN	N	M	M	N	M	M	N	MN	M	MN	M	MN	N	M	N	MN	M	M	N
apices	6 h	phyA	cold+low light	N	N	N	N	N	N	N	O	N	N	N	MN	M	M	N	M	M	N	N	O	N	N	N	N	M	M	N	N	M	N	M	N	N	M	MN	MN	M	M	MN
apices	6 h	phyB	control	Q	Q	Q	Q	Q	Q	Q	Q	Q	R	Q	R	R	QR	Q	Q	Q	Q	Q	Q	Q	Q	Q	QR	R	Q	R	Q	Q	R	Q	Q	Q	Q	Q	Q	Q	Q	Q
apices	6 h	phyB	low light	R	R	Q	Q	Q	Q	R	Q	Q	Q	Q	Q	Q	R	R	Q	Q	R	Q	R	R	Q	Q	Q	Q	Q	Q	Q	Q	Q	Q	Q	QR	Q	Q	Q	Q	Q	Q
apices	6 h	phyB	cold	R	QR	Q	Q	Q	Q	R	Q	Q	R	Q	QR	R	QR	R	Q	Q	R	Q	R	R	Q	Q	R	QR	Q	R	QR	Q	RS	Q	Q	R	Q	Q	Q	Q	Q	Q
apices	6 h	phyB	cold+low light	R	QR	Q	Q	Q	Q	R	Q	Q	R	Q	QR	R	Q	R	Q	Q	R	Q	QR	R	Q	Q	R	R	Q	QR	R	Q	S	Q	Q	QR	Q	Q	Q	Q	Q	Q
apices	7 d	WT	control	A	A	A	A	A	A	AB	A	B	A	B	B	A	B	A	A	B	A	B	A	A	A	A	A	A	A	AB	A	B	A	AB	A	B	AB	A	B	B	BC	AB
apices	7 d	WT	low light	A	C	B	B	A	B	B	B	B	A	A	A	B	B	B	A	A	B	C	C	B	A	AB	A	A	A	B	B	C	B	A	B	AB	A	A	A	B	C	B
apices	7 d	WT	cold	A	A	AB	A	A	A	A	A	AB	A	B	B	B	B	A	A	B	A	B	A	A	A	AB	A	A	A	B	AB	A	A	B	AB	A	B	A	B	A	A	A
apices	7 d	WT	cold+low light	A	B	B	A	A	A	B	B	A	A	B	B	B	A	B	B	B	AB	A	B	AB	A	B	A	A	A	A	A	B	A	B	A	A	B	A	B	AB	AB	B
apices	7 d	cry1	control	E	E	E	E	EF	E	E	E	E	E	F	EF	E	EF	E	E	F	E	E	E	E	EF	EF	E	E	F	E	E	F	E	E	F	F	E	E	E	EF	FG	F
apices	7 d	cry1	low light	E	F	F	F	F	F	F	F	E	F	E	E	F	F	F	E	E	F	E	F	F	F	F	E	F	G	E	F	F	G	E	G	F	E	E	E	F	G	F
apices	7 d	cry1	cold	E	E	E	E	E	E	E	E	E	F	F	F	G	E	E	E	F	EF	E	E	E	E	E	E	E	E	E	EF	E	EF	E	E	E	E	E	E	E	E	E
apices	7 d	cry1	cold+low light	E	F	F	F	F	EF	E	F	E	F	F	EF	G	EF	F	E	EF	F	E	F	F	F	F	E	EF	FG	E	EF	F	FG	E	E	E	E	E	E	E	EF	F
apices	7 d	cry2	control	I	I	I	I	IJ	J	I	I	I	I	J	IJ	I	I	I	I	K	I	I	I	I	I	IJ	I	IJ	I	I	I	J	I	IJ	J	J	I	I	I	J	J	IJ
apices	7 d	cry2	low light	I	K	J	J	IJ	L	J	K	I	IJ	I	I	I	I	J	I	I	J	I	J	J	I	J	IJ	IJ	I	I	J	K	J	I	K	J	I	I	I	J	J	K
apices	7 d	cry2	cold	I	I	I	I	I	I	I	I	J	J	J	J	J	I	I	I	J	I	I	IJ	I	I	I	J	J	I	J	J	I	J	J	L	I	I	I	I	J	I	I
apices	7 d	cry2	cold+low light	I	J	J	J	J	K	I	J	IJ	J	J	J	IJ	I	J	I	J	IJ	I	J	I	I	K	I	I	I	IJ	IJ	JK	IJ	J	I	I	I	I	I	I	I	J
apices	7 d	phyA	control	MN	M	MN	M	MN	M	M	M	M	M	N	N	M	M	M	M	N	M	M	M	M	MN	MN	M	M	MN	M	M	N	M	N	MN	N	M	MN	M	N	N	M
apices	7 d	phyA	low light	N	O	MN	N	MN	N	O	O	M	O	M	M	N	N	O	M	M	O	N	O	O	MN	M	N	M	N	M	N	N	N	M	N	N	M	N	M	N	N	N
apices	7 d	phyA	cold	M	M	M	M	M	M	MN	MN	M	NO	N	N	O	MNO	M	M	N	M	MN	M	M	M	M	MN	M	M	M	MN	M	MN	O	M	M	M	M	M	M	M	M
apices	7 d	phyA	cold+low light	MN	N	N	N	N	N	N	N	M	N	N	N	O	O	N	M	N	N	N	N	N	N	N	MN	M	MN	M	M	N	M	N	M	M	M	MN	M	M	M	N
apices	7 d	phyB	control	Q	Q	Q	Q	Q	Q	Q	Q	Q	Q	Q	R	Q	QR	QR	QR	Q	R	Q	Q	R	Q	Q	Q	R	R	Q	Q	R	QR	Q	R	QR	Q	R	Q	S	R	QR
apices	7 d	phyB	low light	Q	S	QR	QR	Q	R	R	R	Q	R	Q	Q	QR	R	S	R	Q	S	Q	S	S	Q	QR	Q	QR	R	Q	R	R	S	Q	R	R	Q	R	Q	S	R	R
apices	7 d	phyB	cold	Q	QR	Q	QR	Q	Q	QR	Q	Q	R	R	QR	R	Q	Q	Q	Q	Q	Q	Q	Q	Q	Q	R	Q	Q	Q	Q	Q	Q	Q	Q	Q	Q	QR	Q	Q	Q	Q
apices	7 d	phyB	cold+low light	Q	R	R	R	Q	QR	Q	Q	Q	R	Q	QR	QR	QR	R	QR	Q	Q	Q	R	QR	Q	R	R	R	R	Q	R	R	RS	Q	Q	Q	Q	Q	Q	R	Q	R
leaves	30 min	WT	control	A	A	AB	A	A	A	AB	A	A	A	A	AB	A	A	AB	A	A	B	A	AB	B	A	AB	A	A	A	A	A	AB	A	A	B	A	A	A	A	A	A	AB
leaves	30 min	WT	low light	A	A	A	A	A	A	B	A	A	A	A	A	A	A	B	AB	A	B	A	B	B	A	A	A	A	A	A	A	A	A	A	A	A	A	AB	A	A	A	B
leaves	30 min	WT	cold	A	A	B	A	A	A	AB	A	A	A	AB	AB	A	A	A	AB	A	AB	A	AB	B	A	B	B	A	A	A	A	AB	A	A	AB	B	A	B	B	A	B	B
leaves	30 min	WT	cold+low light	A	A	B	A	A	A	A	A	A	A	B	B	A	A	A	B	A	A	A	A	A	A	B	AB	A	A	A	A	B	A	A	B	AB	A	B	B	A	A	A
leaves	30 min	cry1	control	E	E	E	E	E	E	EF	E	E	E	E	E	E	E	EF	E	E	EF	E	E	EF	E	F	E	F	E	EF	E	EF	E	E	EF	EF	EF	F	E	E	E	E
leaves	30 min	cry1	low light	E	E	E	E	E	E	F	F	E	E	E	E	E	E	F	E	E	F	E	E	F	E	E	E	E	EF	E	E	E	E	E	F	E	EF	E	E	E	F	E
leaves	30 min	cry1	cold	E	E	E	E	E	E	E	EF	E	E	E	E	E	E	E	E	E	E	E	E	E	E	EF	E	EF	E	F	E	F	E	E	E	F	E	F	E	E	F	E
leaves	30 min	cry1	cold+low light	E	E	E	E	E	E	EF	EF	E	E	E	E	E	E	EF	E	E	F	E	E	EF	E	EF	E	EF	F	EF	E	F	E	E	F	EF	F	EF	E	F	G	E
leaves	30 min	cry2	control	I	J	I	I	I	I	I	I	I	I	I	I	IJ	I	IJ	I	I	IJ	I	IJ	IJ	I	I	I	J	I	IJ	I	I	I	I	I	I	I	I	I	I	I	I
leaves	30 min	cry2	low light	I	J	I	I	I	I	I	I	I	I	I	I	I	I	J	I	I	J	I	J	J	I	I	I	I	I	I	I	I	I	I	I	I	I	I	I	I	J	I
leaves	30 min	cry2	cold	I	IJ	I	I	I	I	I	I	I	I	I	I	J	I	I	I	I	I	I	IJ	IJ	I	I	I	IJ	I	J	I	I	I	I	I	I	I	I	I	IJ	J	I
leaves	30 min	cry2	cold+low light	I	I	I	I	I	I	I	I	I	I	I	I	IJ	I	IJ	I	I	IJ	I	I	I	I	I	I	I	I	J	I	I	I	I	I	I	I	I	I	J	K	I
leaves	30 min	phyA	control	M	M	M	M	M	M	M	M	M	M	M	M	N	M	M	M	M	M	M	M	M	M	M	M	N	M	M	M	MN	M	M	M	M	M	M	M	N	M	M
leaves	30 min	phyA	low light	M	M	M	M	M	M	M	M	M	M	M	M	N	M	M	M	M	M	M	M	M	M	M	M	M	M	M	M	M	M	M	M	M	M	M	M	M	M	M
leaves	30 min	phyA	cold	M	M	M	M	M	M	M	M	M	M	M	M	MN	M	M	M	M	M	M	M	M	M	M	M	NM	M	M	M	M	M	M	M	M	M	M	M	NO	N	M
leaves	30 min	phyA	cold+low light	M	M	M	M	M	M	M	M	M	M	M	M	M	M	M	M	M	M	M	M	M	M	M	M	M	M	M	M	N	M	M	M	M,	M	M	M	O	O	M
leaves	30 min	phyB	control	Q	Q	Q	Q	Q	Q	QR	Q	Q	Q	R	Q	R	Q	Q	Q	Q	QR	Q	Q	R	Q	Q	Q	Q	Q	Q	Q	Q	Q	Q	Q	R	R	QR	Q	Q	Q	Q
leaves	30 min	phyB	low light	Q	Q	Q	Q	Q	Q	QR	Q	Q	Q	QR	Q	QR	Q	Q	Q	Q	R	Q	Q	R	Q	Q	Q	Q	Q	Q	Q	Q	Q	Q	Q	Q	QR	Q	Q	Q	R	Q
leaves	30 min	phyB	cold	Q	Q	Q	Q	Q	Q	Q	Q	Q	Q	QR	Q	QR	Q	Q	Q	Q	Q	Q	Q	Q	Q	Q	Q	Q	Q	Q	Q	Q	Q	Q	Q	R	QR	R	Q	Q	Q	Q
leaves	30 min	phyB	cold+low light	Q	Q	Q	Q	Q	Q	R	Q	Q	Q	Q	Q	Q	Q	Q	Q	Q	R	Q	Q	R	Q	Q	Q	Q	Q	Q	Q	Q	Q	Q	Q	QR	Q	QR	Q	Q	R	Q
leaves	6 h	WT	control	A	A	AB	A	AB	A	A	A	A	B	A	A	B	A	A	A	B	A	A	A	A	A	A	A	A	A	A	A	AB	A	A	A	A	A	A	A	A	A	A
leaves	6 h	WT	low light	A	C	A	A	A	A	B	A	A	A	A	A	A	A	C	A	B	C	B	C	C	A	A	A	A	A	A	A	A	A	A	B	A	A	A	A	A	A	A
leaves	6 h	WT	cold	A	AB	B	A	B	A	A	A	A	B	AB	A	B	A	B	A	A	BC	B	B	B	A	B	A	A	A	A	A	B	A	A	AB	A	A	B	AB	A	B	A
leaves	6 h	WT	cold+low light	A	B	AB	A	B	A	AB	A	A	B	B	A	B	A	B	A	AB	B	AB	B	B	A	AB	A	A	A	A	A	AB	A	A	B	A	A	AB	B	A	B	A
leaves	6 h	cry1	control	E	E	E	E	E	EF	E	E	EF	F	E	EF	F	E	E	E	E	E	E	E	E	E	E	E	E	E	E	E	E	E	E	E	E	E	EF	E	E	E	E
leaves	6 h	cry1	low light	F	G	E	E	E	EF	E	E	E	E	E	E	E	E	G	E	E	G	F	G	G	E	E	E	E	E	E	E	E	E	E	E	E	E	E	E	F	G	EF
leaves	6 h	cry1	cold	F	F	E	E	E	E	E	E	EF	F	E	F	F	E	F	E	E	F	F	F	F	E	E	E	E	E	E	E	E	E	E	E	E	E	EF	E	EF	F	F
leaves	6 h	cry1	cold+low light	EF	FG	E	E	E	F	E	E	F	F	E	EF	F	E	F	E	E	F	F	FG	F	E	E	E	E	E	E	E	E	E	E	E	E	E	F	E	F	G	EF
leaves	6 h	cry2	control	I	I	IJ	IJ	IJ	I	I	I	J	JK	I	IJK	K	I	I	I	I	I	I	I	I	IJK	IJ	I	I	I	I	I	I	I	I	J	IJ	I	I	I	I	I	I
leaves	6 h	cry2	low light	J	J	I	I	I	I	J	I	I	I	I	I	I	I	K	I	I	K	J	K	J	I	IJ	I	I	I	I	I	I	I	I	IJ	I	I	I	I	I	J	I
leaves	6 h	cry2	cold	J	I	I	I	IJ	I	IJ	I	I	J	I	J	J	I	J	I	I	J	J	J	J	J	I	I	I	I	I	I	I	I	I	I	IJ	I	I	I	IJ	K	I
leaves	6 h	cry2	cold+low light	J	J	J	J	J	I	J	I	K	K	I	K	J	I	K	I	I	K	J	K	J	K	J	I	I	I	I	I	I	I	I	IJ	J	I	I	J	J	L	I
leaves	6 h	phyA	control	M	M	MN	MN	M	M	M	M	MN	N	MN	MN	N	M	M	M	M	M	M	M	M	M	M	M	MN	M	M	M	M	M	M	M	M	M	M	M	M	M	M
leaves	6 h	phyA	low light	N	N	M	M	M	M	N	M	M	M	M	M	M	M	O	M	M	O	M	N	O	M	M	M	N	M	M	M	M	M	M	N	MN	M	M	MN	M	N	M
leaves	6 h	phyA	cold	N	M	MN	MN	M	M	M	M	N	N	MN	N	N	M	N	M	M	N	N	MN	N	M	MN	M	N	M	M	M	M	M	M	MN	MN	M	M	N	M	O	M
leaves	6 h	phyA	cold+low light	MN	N	N	N	M	M	N	M	N	N	N	MN	N	M	N	M	M	N	MN	N	NO	M	N	M	M	M	M	M	M	M	M	N	N	M	M	M	M	NO	M
leaves	6 h	phyB	control	Q	Q	QR	QR	Q	Q	Q	Q	R	R	QR	QR	S	Q	Q	Q	Q	Q	Q	Q	Q	QR	QR	QR	Q	Q	Q	Q	R	Q	Q	Q	QR	Q	QR	R	Q	Q	Q
leaves	6 h	phyB	low light	R	R	Q	Q	Q	Q	R	Q	Q	Q	Q	Q	Q	Q	S	Q	Q	S	Q	R	S	Q	Q	Q	Q	Q	Q	Q	Q	Q	Q	Q	Q	Q	Q	Q	Q	S	Q
leaves	6 h	phyB	cold	QR	Q	QR	QR	Q	Q	QR	Q	R	R	QR	QR	R	Q	R	Q	Q	R	Q	Q	R	QR	QR	QR	Q	Q	Q	Q	QR	Q	Q	Q	R	Q	R	QR	Q	R	Q
leaves	6 h	phyB	cold+low light	R	QR	R	R	Q	Q	R	Q	R	R	R	R	R	Q	RS	Q	Q	R	Q	QR	R	R	R	R	Q	Q	Q	Q	R	Q	Q	Q	R	Q	R	QR	Q	S	Q
leaves	7 d	WT	control	B	B	A	B	AB	B	B	B	A	A	B	B	A	A	B				B	B	B	AB	B	A	B	A	A	A	AB	A	AB	B	B	B	B	C	AB	B	AB
leaves	7 d	WT	low light	B	C	A	B	B	B	C	B	A	A	A	A	A	A	C				B	C	C	AB	A	A	AB	A	B	A	AB	A	A	B	B	A	AB	A	B	B	C
leaves	7 d	WT	cold	A	A	A	A	A	A	A	A	A	A	B	B	B	A	A				A	A	A	A	AB	A	A	A	C	A	A	A	AB	A	A	AB	A	B	A	A	A
leaves	7 d	WT	cold+low light	B	B	A	AB	B	B	B	B	A	A	B	B	AB	A	B				B	B	B	B	B	A	AB	A	B	A	B	A	B	AB	AB	B	AB	AB	A	A	B
leaves	7 d	cry1	control	F	F	F	E	E	F	F	F	E	E	F	F	E	E	F	F	F	F	F	F	F	E	F	E	E	EF	E	EF	E	E	F	FG	F	F	F	G	F	G	EF
leaves	7 d	cry1	low light	F	G	F	F	E	G	G	G	E	E	E	E	F	E	G	F	E	G	F	G	G	E	E	E	E	EF	EF	F	E	E	EF	G	EF	E	F	E	F	F	F
leaves	7 d	cry1	cold	E	E	E	E	E	E	E	E	E	E	F	F	F	E	E	E	E	E	E	E	E	E	E	E	E	E	F	EF	E	E	EF	F	EF	F	EF	F	E	E	E
leaves	7 d	cry1	cold+low light	F	F	EF	E	E	F	F	F	E	E	F	F	EF	E	FG	F	E	F	EF	F	F	E	E	E	E	F	EF	E	E	E	E	E	E	EF	E	E	F	G	E
leaves	7 d	cry2	control	J	J	I	IJ	IJ	J	J	J	I	I	J	J	I	I	J	J	J	J	J	J	J	IJ	K	I	J	I	I	IJ	I	I	I	J	J	J	J	K	I	IJ	I
leaves	7 d	cry2	low light	J	K	I	J	IJ	K	K	J	I	J	I	I	J	I	K	I	I	K	J	K	K	I	I	I	IJ	I	J	J	I	I	I	J	IJ	I	I	J	I	K	J
leaves	7 d	cry2	cold	I	I	I	IJ	I	I	I	I	I	K	J	J	J	I	I	I	J	I	I	I	I	I	IJ	J	I	I	J	IJ	I	I	I	I	I	IJ	I	J	I	JK	I
leaves	7 d	cry2	cold+low light	J	J	I	I	J	J	J	J	I	J	J	J	IJ	I	J	I	IJ	J	J	J	J	J	J	J	I	I	J	I	I	I	I	I	I	IJ	I	I	I	I	I
leaves	7 d	phyA	control	N	N	N	M	MN	NO	N	N	M	M	N	N	M	N	N	N	N	N	N	N	NO	MN	N	M	N	N	M	M	MN	M	M	N	N	N	O	N	N	O	M
leaves	7 d	phyA	low light	N	O	M	M	N	O	O	O	M	N	M	M	NO	M	O	M	M	N	N	O	O	N	M	M	MN	MN	N	M	N	M	M	N	N	M	N	M	N	N	N
leaves	7 d	phyA	cold	M	M	M	M	M	M	M	M	M	N	N	MN	O	M	M	M	MN	M	M	M	M	M	M	M	M	MN	O	M	M	M	M	M	M	N	M	MN	M	M	M
leaves	7 d	phyA	cold+low light	N	N	MN	M	MN	N	N	N	M	N	N	N	N	M	NO	M	M	N	N	N	N	N	MN	M	M	M	MNO	M	N	M	M	MN	MN	MN	MN	M	MN	N	M
leaves	7 d	phyB	control	S	R	R	Q	QR	R	R	R	Q	Q	R	R	Q	R	R	R	QR	S	S	R	S	QR	R	Q	R	Q	Q	Q	Q	Q	Q	R	R	R	R	R	R	T	Q
leaves	7 d	phyB	low light	S	S	QR	Q	QR	S	S	S	Q	R	Q	Q	R	Q	R	R	QR	S	RS	S	S	Q	Q	QR	Q	Q	Q	Q	R	Q	Q	R	QR	Q	Q	Q	R	S	Q
leaves	7 d	phyB	cold	Q	Q	Q	Q	Q	Q	Q	Q	Q	R	R	R	R	Q	Q	Q	R	Q	Q	Q	Q	Q	Q	R	Q	Q	R	Q	Q	Q	Q	R	Q	R	QR	QR	Q	Q	Q
leaves	7 d	phyB	cold+low light	R	R	R	Q	R	R	R	R	Q	R	R	R	R	Q	R	QR	Q	R	R	R	R	R	QR	QR	QR	Q	Q	Q	QR	Q	Q	Q	Q	QR	Q	Q	QR	R	Q
roots	30 min	WT	control	A	B	A	A	A	A	AB	A	A	A	AB	A	B	A	A	B	A	A	A	B	B	A	A	B	A	AB	A	A	A	A	AB	A	A	B	A	AB	B	B	B
roots	30 min	WT	low light	A	AB	A	A	A	A	A	A	A	A	A	A	A	AB	A	B	AB	A	A	AB	A	AB	A	B	A	B	AB	A	A	C	B	A	AB	A	AB	A	AB	C	B
roots	30 min	WT	cold	A	A	A	A	A	A	AB	A	A	A	B	A	B	B	A	AB	B	A	A	A	B	AB	A	AB	A	A	B	A	B	C	AB	A	B	B	B	A	A	A	A
roots	30 min	WT	cold+low light	A	B	A	A	A	A	B	A	A	A	AB	B	B	AB	A	A	A	A	A	B	B	B	A	AB	A	AB	B	A	AB	B	A	A	AB	B	AB	B	AB	D	A
roots	30 min	cry1	control	F	G	F	F	E	F	F	E	F	E	F	E	F	E	F	F	E	F	E	F	G	EF	F	F	E	E	E	EF	F	E	E	E	F	E	F	E	E	F	E
roots	30 min	cry1	low light	E	F	EF	G	E	EF	E	E	E	E	EF	E	E	E	E	EF	E	E	E	E	E	EF	EF	E	G	E	E	F	E	F	E	EF	E	E	EF	E	E	E	E
roots	30 min	cry1	cold	E	E	E	E	E	E	G	E	E	E	E	E	F	E	E	E	E	E	E	E	F	E	E	EF	G	E	E	E	E	F	E	E	E	E	E	E	E	F	E
roots	30 min	cry1	cold+low light	EF	FG	EF	EFG	F	EF	FG	E	EF	E	F	E	EF	E	F	EF	E	EF	E	F	EFG	F	EF	EF	F	E	E	E	E	EF	E	F	EF	E	E	E	E	G	E
roots	30 min	cry2	control	J	J	J	IJ	I	J	J	J	J	I	J	J	J	IJ	J	K	IJ	K	J	J	K	J	J	J	IJ	J	J	J	J	J	I	I	IJ	J	IJK	J	J	K	J
roots	30 min	cry2	low light	I	IJ	I	I	I	I	I	I	I	I	I	I	I	I	I	I	I	J	I	I	I	I	I	IJ	J	I	I	I	I	IJ	I	IJ	I	I	J	IJ	I	I	J
roots	30 min	cry2	cold	IJ	I	J	J	I	J	J	I	J	I	J	IJ	J	J	I	J	J	I	J	I	J	J	J	I	J	J	J	J	I	K	I	J	J	IJ	K	IJ	IJ	J	IJ
roots	30 min	cry2	cold+low light	J	IJ	IJ	IJ	I	J	J	IJ	J	I	J	IJ	IJ	J	IJ	IJK	I	J	J	IJ	IJK	J	J	IJ	I	IJ	J	IJ	I	I	I	IJ	IJ	IJ	I	I	J	L	I
roots	30 min	phyA	control	N	N	M	M	M	M	M	M	M	M	MN	M	M	M	M	N	M	N	N	N	N	M	M	N	M	M	M	M	M	M	M	M	M	MN	N	N	M	O	N
roots	30 min	phyA	low light	MN	N	M	M	M	M	M	M	M	M	MN	M	M	M	M	MN	M	MN	MN	N	M	M	M	M	MN	M	M	M	M	M	M	M	M	N	M	N	M	N	M
roots	30 min	phyA	cold	M	M	M	M	M	M	M	N	M	M	N	M	M	M	M	N	M	MN	M	M	MN	M	M	MN	N	M	M	M	M	N	M	M	M	N	N	N	M	M	MN
roots	30 min	phyA	cold+low light	N	N	N	N	M	M	M	MN	M	M	M	M	M	M	M	M	M	M	MN	N	M	M	M	MN	M	M	M	M	M	M	M	M	M	M	M	M	M	N	M
roots	30 min	phyB	control	R	Q	R	Q	Q	Q	R	Q	R	Q	R	Q	Q	QR	Q	R	Q	Q	R	Q	R	Q	R	R	QR	QR	R	QR	QR	R	Q	Q	Q	QR	R	R	R	T	R
roots	30 min	phyB	low light	Q	Q	Q	Q	Q	Q	Q	Q	Q	Q	Q	Q	Q	Q	Q	Q	Q	Q	Q	Q	Q	Q	Q	Q	Q	Q	Q	Q	Q	Q	Q	Q	Q	Q	QR	Q	Q	Q	Q
roots	30 min	phyB	cold	QR	QR	Q	Q	Q	Q	QRS	Q	QR	Q	R	Q	Q	QR	Q	R	QR	Q	QR	Q	R	Q	R	QR	R	R	S	QR	R	R	Q	Q	R	R	R	R	R	R	Q
roots	30 min	phyB	cold+low light	R	R	R	Q	Q	R	S	Q	QR	Q	R	Q	Q	R	Q	QR	R	Q	QR	Q	QR	Q	R	R	Q	QR	S	R	R	R	Q	R	QR	QR	Q	R	R	S	QR
roots	6 h	WT	control	A	AB	A	A	AB	A	B	A	A	A	A	A	B	A	A	AB	A	A	A	A	B	A	AB	A	AB	A	A	A	A	A	A	AB	A	A	B	A	AB	B	B
roots	6 h	WT	low light	B	C	A	A	A	B	D	A	A	B	B	A	A	B	A	B	B	B	B	B	A	A	B	B	A	C	B	B	A	B	A	B	A	A	A	A	AB	A	A
roots	6 h	WT	cold	B	A	A	A	B	AB	A	A	B	B	AB	A	B	AB	A	A	A	AB	AB	A	AB	A	AB	AB	B	B	A	A	A	AB	A	A	A	A	B	A	A	A	A
roots	6 h	WT	cold+low light	B	B	A	A	A	A	C	A	AB	AB	A	A	B	AB	A	AB	AB	AB	B	A	B	A	A	AB	B	ABC	C	A	A	B	A	A	A	A	B	A	B	B	A
roots	6 h	cry1	control	E	E	E	E	E	E	EF	E	F	E	E	E	E	E	E	E	E	F	E	E	F	E	E	E	F	E	E	F	F	F	E	EF	E	F	E	F	F	F	EF
roots	6 h	cry1	low light	F	F	E	F	E	E	G	E	E	E	E	E	F	E	E	E	EF	F	E	E	G	E	E	F	E	E	E	E	E	E	F	F	E	E	E	EF	E	F	F
roots	6 h	cry1	cold	E	E	E	EF	E	E	E	E	EF	E	E	E	E	E	E	E	EF	E	E	E	E	E	E	EF	G	E	E	F	EF	G	EF	E	E	E	E	E	E	E	E
roots	6 h	cry1	cold+low light	F	EF	E	F	E	E	F	E	E	E	E	E	E	E	E	E	F	F	E	E	F	E	E	EF	EF	E	E	EF	F	F	EF	F	E	E	E	E	EF	F	E
roots	6 h	cry2	control	I	IJ	I	I	I	I	J	IJ	J	I	J	J	I	IJ	IJ	I	I	IJ	I	IJ	IJ	J	J	I	J	I	J	IJ	J	K	J	I	I	J	IJ	J	J	J	J
roots	6 h	cry2	low light	J	K	I	I	I	I	K	IJ	I	I	I	I	IJ	I	IJ	I	J	J	I	J	J	I	I	I	I	I	I	I	I	I	I	I	I	I	I	IJ	I	I	IJ
roots	6 h	cry2	cold	J	I	I	I	I	I	I	I	J	I	J	IJ	J	J	I	I	K	I	J	I	I	J	K	I	K	I	J	K	J	L	J	I	I	I	IJ	IJ	J	J	IJ
roots	6 h	cry2	cold+low light	J	J	I	I	I	I	IJ	J	J	I	J	IJ	IJ	J	J	I	IJ	J	J	J	J	IJ	JK	I	IJK	I	J	J	J	J	IJ	I	I	I	J	I	J	K	I
roots	6 h	phyA	control	M	M	M	M	M	M	M	M	N	M	MN	N	N	M	M	M	M	M	M	MN	N	M	M	M	M	M	M	M	M	N	M	M	M	N	M	N	M	N	N
roots	6 h	phyA	low light	N	N	M	M	M	M	M	M	M	M	MN	MN	M	MN	M	M	N	M	M	N	M	M	M	N	M	O	M	N	M	MN	M	N	M	N	M	N	M	M	N
roots	6 h	phyA	cold	M	M	M	M	M	M	M	M	MN	M	N	N	N	N	M	M	M	M	M	M	N	M	M	M	N	N	M	MN	MN	O	M	M	M	M	M	M	M	M	M
roots	6 h	phyA	cold+low light	N	N	M	M	M	M	N	N	N	M	M	M	N	MN	N	M	M	M	M	N	N	M	M	O	M	MNO	M	MN	N	M	M	MN	M	MN	M	MN	M	O	MN
roots	6 h	phyB	control	Q	QR	Q	Q	Q	R	QR	Q	Q	QR	QR	R	R	QR	R	Q	Q	Q	Q	R	Q	Q	Q	Q	R	Q	Q	Q	Q	R	Q	QR	Q	Q	Q	Q	R	S	QR
roots	6 h	phyB	low light	Q	Q	Q	Q	Q	Q	QR	Q	Q	Q	Q	Q	Q	Q	Q	Q	R	Q	Q	Q	Q	Q	Q	Q	Q	Q	Q	Q	Q	Q	Q	R	Q	Q	Q	Q	Q	Q	R
roots	6 h	phyB	cold	Q	Q	Q	Q	Q	QR	Q	Q	Q	R	R	Q	R	R	R	Q	QR	Q	Q	QR	Q	Q	Q	Q	S	Q	Q	Q	Q	R	Q	Q	Q	Q	Q	Q	QR	R	Q
roots	6 h	phyB	cold+low light	Q	R	Q	Q	Q	QR	R	Q	Q	QR	QR	Q	R	R	R	Q	R	Q	Q	R	Q	Q	Q	Q	RS	Q	Q	Q	Q	R	Q	QR	Q	Q	Q	Q	R	R	Q
roots	7 d	WT	control	B	B	A	B	A	AB	B	A	A	A	BC	A	A	A	A	B	B	A	AB	A	A	A	B	B	B	C	A	AB	A	A	B	B	B	B	B	B	A	A	B
roots	7 d	WT	low light	B	C	A	B	A	A	C	C	B	C	A	B	C	C	C	A	A	C	B	C	C	A	A	B	A	BC	B	C	A	A	A	B	AB	B	B	B	B	D	B
roots	7 d	WT	cold	A	A	A	A	A	A	A	A	AB	B	C	AB	A	ABC	A	AB	B	A	A	A	AB	A	AB	AB	AB	A	AB	A	A	A	AB	A	B	A	AB	A	A	B	AB
roots	7 d	WT	cold+low light	B	C	A	AB	A	B	B	B	AB	BC	B	AB	B	B	B	AB	A	B	A	B	B	A	B	A	B	B	A	B	A	A	B	A	A	AB	A	B	A	C	A
roots	7 d	cry1	control	FG	F	E	E	E	FG	F	EF	EF	E	F	E	EF	EF	E	F	F	E	EF	E	EF	E	EF	FG	F	G	E	FG	EF	G	E	F	F	G	E	F	E	F	F
roots	7 d	cry1	low light	G	G	E	E	E	G	G	G	G	F	E	G	F	F	G	E	E	F	G	G	G	E	E	G	F	G	EF	G	EF	H	E	G	F	F	E	E	F	G	F
roots	7 d	cry1	cold	E	E	E	E	E	E	E	E	E	F	G	E	E	E	F	F	F	EF	E	E	E	E	F	F	E	E	F	E	E	E	E	E	E	F	E	E	E	F	E
roots	7 d	cry1	cold+low light	F	F	E	E	E	F	EF	F	F	F	F	F	F	E	F	F	E	EF	F	F	F	E	EF	E	EF	F	EF	F	F	F	E	E	EF	E	E	E	E	E	E
roots	7 d	cry2	control	J	J	IJ	IJ	IJ	IJ	J	I	I	I	J	IJ	I	I	I	J	J	I	I	I	I	IJ	J	IJ	J	K	I	J	J	K	I	J	J	J	I	J	J	IJ	K
roots	7 d	cry2	low light	K	K	J	IJ	IJ	J	K	K	J	JK	I	K	J	K	K	I	I	J	J	J	J	IJ	I	J	J	K	J	J	J	L	I	J	J	J	I	IJ	K	J	K
roots	7 d	cry2	cold	I	I	I	I	I	I	I	I	I	K	K	I	J	IJ	J	IJ	I	I	I	I	I	I	J	I	I	I	IJ	I	I	I	I	I	I	I	I	I	I	J	I
roots	7 d	cry2	cold+low light	IJ	J	J	J	J	IJ	J	J	I	J	JK	J	IJ	J	J	J	IJ	IJ	I	I	I	J	J	I	IJ	J	IJ	J	IJ	J	I	I	IJ	J	I	IJ	J	I	J
roots	7 d	phyA	control	N	N	N	N	N	M	N	M	M	M	N	M	M	M	M	N	N	MN	M	M	M	N	N	M	N	N	M	MN	M	O	M	N	M	N	N	N	N	N	N
roots	7 d	phyA	low light	N	O	N	N	N	M	O	N	O	NO	M	O	N	O	O	M	MN	N	O	N	N	N	M	MN	N	N	O	N	M	O	M	N	M	N	N	N	O	O	O
roots	7 d	phyA	cold	M	M	M	M	M	M	M	M	MNO	N	N	N	M	MN	M	N	N	M	M	M	M	M	MN	MN	MN	M	N	M	M	N	M	M	M	M	N	M	M	N	M
roots	7 d	phyA	cold+low light	N	N	N	O	N	M	N	N	N	O	N	N	O	N	N	N	M	N	N	N	N	N	N	N	M	M	M	M	M	M	M	M	M	M	M	N	MN	M	MNO
roots	7 d	phyB	control	R	R	Q	Q	Q	Q	R	Q	Q	Q	QR	Q	Q	Q	Q	Q	RČ	QR	Q	Q	QR	Q	Q	R	R	S	Q	QR	R	R	R	R	Q	R	Q	Q	Q	Q	R
roots	7 d	phyB	low light	S	S	Q	Q	Q	R	S	S	R	R	Q	R	Q	R	S	Q	R	S	R	S	R	Q	Q	R	R	S	R	S	R	S	R	S	Q	R	QR	Q	R	R	S
roots	7 d	phyB	cold	Q	Q	Q	Q	Q	Q	Q	Q	R	R	R	Q	Q	R	R	Q	R	Q	R	Q	Q	Q	Q	R	Q	Q	R	Q	R	Q	R	QR	Q	QR	R	Q	Q	R	Q
roots	7 d	phyB	cold+low light	Q	R	Q	Q	Q	QR	R	R	QR	R	QR	Q	R	R	S	Q	Q	R	R	R	R	Q	Q	Q	R	R	R	R	Q	RS	Q	Q	Q	Q	Q	Q	R	S	Q

## Sheet: Stat_time
tissue	time	genotype	variant	tZ	tZR	tZ7G	tZ9G	tZOG	tZROG	tZRMP	DZR	cZ	cZR	cZ7G	cZROG	cZRMP	iP	iPR	iP7G	iP9G	iPRMP	CK bases	CK ribosides	CK phosphates	CK O-glucosides	CK N-glucosides	IAA	IAA-Asp	IAA-GE	OxIAA	OxIAA-GE	IAM	IAA metabolites	GA19	ABA	PA	DPA	9OH-ABA	ABA metabolites	JA	JA-Ile	SA
apices	30 min	WT	control	B	B	B	A	A	B	B	A	A	A	A	A	A	A	B	A	B	B	B	B	B	A	B	A	B	A	A	A	A	A	A	A	AB	A	A	A	B	A	A
apices	6 h	WT	control	A	A	A	A	A	A	A	A	A	A	A	A	B	A	A	A	A	A	A	A	A	A	AB	A	AB	A	A	A	A	A	A	A	A	A	A	A	A	A	A
apices	7 d	WT	control	B	A	A	A	A	A	AB	A	B	A	A	A	AB	A	AB	A	B	AB	AB	A	A	A	A	A	A	A	A	A	A	A	A	A	B	A	B	A	A	A	A
leaves	30 min	WT	control	A	B	AB	AB	A	B	B	A	A	A	B	A	A	AB	C	A	AB	C	B	B	B	B	A	A	A	A	A	A	A	A	A	B	A	A	A	A	A	B	A
leaves	6 h	WT	control	A	A	A	A	A	A	A	A	A	B	A	A	B	A	A	A	A	A	A	A	A	A	A	B	A	A	A	A	A	A	A	A	A	A	A	A	A	A	A
leaves	7 d	WT	control	A	B	B	B	A	B	B	A	A	B	B	A	AB	B	B	B	B	B	C	B	B	AB	B	B	A	A	A	A	A	A	A	A	A	A	A	B	A	B	A
roots	30 min	WT	control	B	B	A	A	A	B	A	B	A	B	A	A	B	A	B	A	A	B	A	B	B	A	A	B	AB	A	A	A	A	B	A	A	A	AB	A	A	C	B	A
roots	6 h	WT	control	A	AB	A	A	A	A	A	B	A	B	A	A	B	A	B	A	A	AB	A	B	B	A	A	A	A	A	A	A	A	A	A	A	A	B	AB	A	B	C	A
roots	7 d	WT	control	B	A	A	A	A	B	A	A	A	A	A	A	A	A	A	A	A	A	A	A	A	A	A	AB	B	B	A	A	A	B	A	A	A	A	B	A	A	A	A
