# Supplementary material for: Light Quality and Intensity Modulate Cold Acclimation in Arabidopsis
Source: Int J Mol Sci. 2021 Mar 8;22(5):2736. doi: 10.3390/ijms22052736 (PMC7962961; doi:10.3390/ijms22052736)
Supplement: Supplementary file 1 [file ijms-22-02736-s001.zip › Table S3-qPCR.xlsx]

## Sheet: Description
Data from RT-qPCR were related to UBQ10. Data were normalized to WT in control conditions at 30 min within each tissue separately.
The sheet Mean_SD includes the means ± standard deviations.
The statistics used for comparison of the RT-qPCR results was one-way ANOVA with Tukey's post-hoc test (p<0.05, n=4)
Four biological replicates were used for analysis.
Statistical significant differences are marked by different letters (see the detail description below).
The statistics on the sheet Stat_var compare genotypes within each experimental condition within each tissue and timepoint. Letters used within each condition are:
control		a-e
low light		f-j
cold		k-o
cold + low light		p-t
The statistics on the sheet Stat_gen compare the influence of experimental conditions within each genotype within each tissue and timepoint. Letters used for genotypes are:
WT		A-D
cry1		E-H
cry2		I-L
phyA		M-P
phyB		Q-T
The statistics on the sheet Stat_time compare the influence of time on WT in control conditions within each tissue separately. Letters used for the statistics are:
WT	A-C

## Sheet: Mean_SD
tissue	time	variant	genotype	RD29A	COR47	CBF1	CBF2	CBF3	HY5	PIF3	PIF4	NCED3	PYL6	IPT3	IPT5	CKX5	ARR4	ARR5	ARR7	ARR10	CRF3	CRF4	GA2OX1	GA2OX6	RGA1	RGA2	RGL3	D14	MAX2	SMAX1	SMXL6
apices	30 min	control	WT	1.00 ± 0.60	1.00 ± 0.42	1.00 ± 0.52	1.00 ± 0.09	1.00 ± 0.25	1.00 ± 0.80	1.00 ± 0.51	1.00 ± 0.25	1.00 ± 0.13	1.00 ± 0.42	1.00 ± 0.86	1.00 ± 0.34	1.00 ± 0.51	1.00 ± 0.16	1.00 ± 0.43	1.00 ± 0.16	1.00 ± 0.34	1.00 ± 0.39	1.00 ± 0.28	1.00 ± 0.60	1.00 ± 0.60	1.00 ± 0.10	1.00 ± 0.70	1.00 ± 0.60	1.00 ± 0.21	1.00 ± 0.68	1.00 ± 0.47	1.00 ± 0.58
apices	30 min	control	cry1	2.61 ± 1.56	1.17 ± 0.64	1.58 ± 0.57	0.61 ± 0.37	1.60 ± 0.85	1.23 ± 0.38	8.43 ± 3.95	2.58 ± 1.26	1.94 ± 0.62	1.29 ± 0.61	2.12 ± 1.01	0.31 ± 0.19	1.72 ± 0.05	0.89 ± 0.06	1.70 ± 0.05	3.50 ± 2.07	0.63 ± 0.23	1.70 ± 0.80	1.65 ± 0.87	4.03 ± 0.06	5.50 ± 3.30	1.68 ± 0.46	0.98 ± 0.64	19.26 ± 11.56	1.19 ± 0.31	0.83 ± 0.26	0.44 ± 0.20	4.14 ± 1.70
apices	30 min	control	cry2	1.47 ± 0.32	0.77 ± 0.36	0.35 ± 0.12	2.25 ± 1.28	1.50 ± 0.76	1.28 ± 0.82	7.30 ± 6.09	0.93 ± 0.32	0.68 ± 0.41	2.46 ± 1.21	6.35 ± 3.54	1.81 ± 1.09	1.24 ± 0.64	2.54 ± 1.53	1.21 ± 0.34	3.38 ± 2.29	0.48 ± 0.23	0.77 ± 0.36	0.73 ± 0.21	12.97 ± 5.00	4.41 ± 0.79	3.65 ± 1.57	0.60 ± 0.18	14.05 ± 5.31	4.21 ± 2.52	0.58 ± 0.30	0.57 ± 0.34	1.15 ± 0.16
apices	30 min	control	phyA	4.35 ± 2.21	1.54 ± 1.25	0.90 ± 0.63	1.21 ± 0.80	1.08 ± 0.85	1.48 ± 0.78	7.09 ± 4.46	1.59 ± 0.61	2.70 ± 0.96	2.29 ± 0.95	2.25 ± 0.84	0.65 ± 0.39	0.98 ± 0.79	3.97 ± 2.84	0.51 ± 0.41	1.97 ± 1.19	1.97 ± 1.14	1.93 ± 0.46	1.04 ± 0.48	26.36 ± 15.33	6.82 ± 2.46	2.71 ± 2.05	1.04 ± 0.60	3.80 ± 2.73	9.27 ± 3.31	1.66 ± 0.46	1.35 ± 0.58	2.66 ± 1.42
apices	30 min	control	phyB	8.45 ± 3.02	3.17 ± 0.43	0.51 ± 0.30	1.00 ± 0.59	0.97 ± 0.21	1.46 ± 1.00	10.28 ± 4.15	2.90 ± 1.11	0.64 ± 0.19	0.96 ± 0.38	1.81 ± 0.47	0.29 ± 0.23	1.58 ± 0.47	4.46 ± 1.51	1.67 ± 0.95	1.88 ± 1.41	1.31 ± 0.67	1.56 ± 1.07	0.96 ± 0.41	38.38 ± 23.03	31.59 ± 4.87	3.86 ± 2.89	2.28 ± 0.61	1.49 ± 0.53	13.21 ± 4.45	1.34 ± 0.80	1.66 ± 1.14	2.34 ± 0.13
apices	30 min	low light	WT	4.72 ± 0.60	33.63 ± 6.85	0.09 ± 0.02	2.38 ± 0.57	0.44 ± 0.20	0.97 ± 0.57	19.28 ± 8.53	19.10 ± 4.53	0.24 ± 0.11	0.94 ± 0.26	2.49 ± 1.04	0.59 ± 0.38	1.98 ± 0.76	17.58 ± 7.23	1.67 ± 0.29	10.22 ± 2.30	4.09 ± 0.59	2.01 ± 0.31	2.02 ± 0.57	17.73 ± 6.14	24.79 ± 15.87	13.56 ± 1.46	2.52 ± 0.56	2.88 ± 0.53	79.14 ± 21.81	1.72 ± 0.58	3.48 ± 1.21	0.38 ± 0.31
apices	30 min	low light	cry1	5.69 ± 2.03	5.98 ± 2.11	0.12 ± 0.06	0.64 ± 0.24	0.18 ± 0.07	0.55 ± 0.22	20.59 ± 6.64	10.51 ± 3.53	0.51 ± 0.20	1.25 ± 0.20	8.73 ± 3.34	0.41 ± 0.25	1.96 ± 0.39	8.50 ± 4.13	4.65 ± 0.66	4.39 ± 2.01	0.98 ± 0.13	0.46 ± 0.17	0.46 ± 0.08	36.08 ± 13.29	31.21 ± 4.14	16.72 ± 5.55	2.17 ± 0.94	5.16 ± 1.59	26.65 ± 7.78	3.05 ± 1.16	4.00 ± 1.40	0.94 ± 0.43
apices	30 min	low light	cry2	3.38 ± 1.30	4.46 ± 0.77	0.07 ± 0.04	0.39 ± 0.12	0.03 ± 0.02	0.36 ± 0.04	5.64 ± 0.23	5.61 ± 0.17	0.19 ± 0.11	0.51 ± 0.10	11.88 ± 0.21	0.22 ± 0.04	0.72 ± 0.07	6.46 ± 0.99	1.42 ± 0.03	1.01 ± 0.11	0.65 ± 0.09	0.30 ± 0.08	0.29 ± 0.01	18.90 ± 2.49	17.69 ± 15.88	11.79 ± 2.66	1.26 ± 0.34	2.33 ± 0.05	19.63 ± 11.78	1.60 ± 0.65	2.39 ± 0.43	0.69 ± 0.15
apices	30 min	low light	phyA	1.56 ± 0.85	2.14 ± 0.79	0.06 ± 0.02	0.34 ± 0.06	0.02 ± 0.02	0.28 ± 0.08	6.93 ± 2.40	2.06 ± 0.81	0.33 ± 0.16	0.49 ± 0.13	2.53 ± 1.52	0.16 ± 0.13	0.61 ± 0.10	3.56 ± 1.60	1.01 ± 0.54	1.97 ± 0.28	0.51 ± 0.24	0.15 ± 0.06	0.31 ± 0.12	7.25 ± 4.35	10.42 ± 6.08	6.56 ± 3.11	1.12 ± 0.43	2.48 ± 0.94	15.85 ± 4.02	1.28 ± 0.54	2.14 ± 1.02	0.31 ± 0.17
apices	30 min	low light	phyB	9.87 ± 5.92	2.86 ± 0.32	0.40 ± 0.03	0.68 ± 0.09	0.79 ± 0.03	0.53 ± 0.04	7.27 ± 2.59	2.72 ± 0.08	0.39 ± 0.05	0.37 ± 0.05	2.73 ± 0.50	0.27 ± 0.17	1.80 ± 0.09	1.90 ± 0.45	0.58 ± 0.19	0.64 ± 0.09	0.40 ± 0.09	0.39 ± 0.21	0.12 ± 0.01	28.15 ± 3.61	34.06 ± 14.87	5.37 ± 3.68	0.63 ± 0.32	1.73 ± 0.14	10.45 ± 0.29	1.02 ± 0.61	1.30 ± 0.30	0.33 ± 0.14
apices	30 min	cold	WT	9.65 ± 2.14	18.47 ± 5.26	9.66 ± 7.12	87.31 ± 35.23	113.89 ± 5.29	3.23 ± 1.19	49.89 ± 3.20	18.56 ± 2.84	4.46 ± 1.43	3.22 ± 0.68	7.08 ± 1.06	0.40 ± 0.02	2.95 ± 1.16	16.54 ± 7.88	11.71 ± 1.64	29.33 ± 2.62	2.65 ± 0.53	1.91 ± 0.72	4.31 ± 1.54	80.83 ± 7.00	39.42 ± 13.80	22.65 ± 1.26	3.15 ± 2.01	3.11 ± 0.59	51.44 ± 12.54	2.62 ± 0.31	13.62 ± 6.46	0.79 ± 0.42
apices	30 min	cold	cry1	14.43 ± 6.93	27.32 ± 15.12	49.18 ± 32.60	140.30 ± 31.45	126.96 ± 39.96	0.62 ± 0.28	95.64 ± 23.54	18.36 ± 11.68	5.35 ± 1.48	3.60 ± 0.49	8.37 ± 3.15	0.41 ± 0.17	1.57 ± 0.53	11.42 ± 6.29	9.24 ± 4.09	14.86 ± 5.06	2.27 ± 0.63	7.03 ± 0.97	7.16 ± 1.06	64.60 ± 48.67	23.76 ± 10.23	11.03 ± 3.53	1.34 ± 0.70	4.50 ± 2.31	69.07 ± 30.64	2.25 ± 1.83	24.52 ± 14.00	1.33 ± 0.91
apices	30 min	cold	cry2	18.11 ± 9.03	41.62 ± 9.36	13.56 ± 5.61	166.19 ± 123.11	253.64 ± 44.42	2.94 ± 1.67	80.70 ± 48.89	16.04 ± 6.77	3.91 ± 1.69	4.03 ± 1.58	8.78 ± 5.04	0.37 ± 0.12	2.03 ± 0.79	22.41 ± 4.42	10.56 ± 3.13	20.27 ± 3.02	3.22 ± 0.58	12.30 ± 4.31	6.64 ± 3.87	48.53 ± 20.76	34.97 ± 11.59	30.63 ± 14.42	3.69 ± 1.91	5.02 ± 3.06	58.58 ± 38.73	2.38 ± 1.43	19.61 ± 11.74	1.43 ± 0.54
apices	30 min	cold	phyA	5.14 ± 3.51	24.57 ± 7.13	24.58 ± 14.75	86.60 ± 54.41	58.47 ± 24.61	0.58 ± 0.06	37.44 ± 14.42	17.52 ± 10.51	1.60 ± 0.87	3.92 ± 0.91	9.30 ± 5.23	0.29 ± 0.24	1.57 ± 0.59	10.10 ± 7.41	10.38 ± 3.07	14.23 ± 4.38	2.61 ± 0.53	2.07 ± 0.53	3.65 ± 2.63	71.75 ± 36.06	20.87 ± 9.06	39.24 ± 24.75	3.58 ± 2.19	9.66 ± 4.35	66.96 ± 30.04	9.67 ± 3.17	12.57 ± 3.70	0.61 ± 0.53
apices	30 min	cold	phyB	27.51 ± 6.67	37.13 ± 13.79	54.45 ± 22.64	154.78 ± 88.31	134.49 ± 72.26	0.48 ± 0.25	97.30 ± 34.51	22.49 ± 10.10	14.06 ± 5.99	1.55 ± 0.33	1.93 ± 1.26	0.51 ± 0.24	5.36 ± 1.96	6.80 ± 2.54	19.95 ± 6.95	9.42 ± 4.37	2.04 ± 0.42	2.22 ± 1.03	4.02 ± 1.89	124.11 ± 103.67	91.21 ± 53.70	36.09 ± 22.26	5.09 ± 1.90	7.27 ± 2.06	36.25 ± 17.06	2.28 ± 1.42	13.30 ± 9.21	1.11 ± 0.30
apices	30 min	cold + low light	WT	3.31 ± 0.28	23.17 ± 15.32	18.70 ± 9.35	93.14 ± 76.35	49.85 ± 19.83	0.43 ± 0.33	6.13 ± 1.27	1.80 ± 0.63	1.39 ± 0.84	2.14 ± 0.72	10.93 ± 2.48	1.59 ± 0.45	1.75 ± 0.63	6.28 ± 3.66	0.76 ± 0.15	12.80 ± 5.70	1.27 ± 0.33	0.88 ± 0.22	2.16 ± 0.78	11.33 ± 6.80	37.22 ± 31.16	5.49 ± 1.83	3.17 ± 1.68	10.58 ± 6.06	24.91 ± 12.34	0.92 ± 0.14	1.12 ± 0.32	0.46 ± 0.27
apices	30 min	cold + low light	cry1	3.29 ± 0.42	44.53 ± 4.62	99.04 ± 31.18	220.15 ± 107.26	178.62 ± 101.24	0.21 ± 0.06	13.01 ± 6.89	12.76 ± 4.41	3.27 ± 0.79	2.81 ± 0.43	1.67 ± 1.36	0.96 ± 0.26	1.14 ± 0.24	7.28 ± 1.17	0.73 ± 0.44	18.17 ± 0.61	1.90 ± 0.35	1.57 ± 0.95	1.90 ± 0.88	21.42 ± 7.73	180.76 ± 90.47	1.64 ± 0.21	2.17 ± 0.51	4.54 ± 0.74	26.04 ± 13.59	1.61 ± 0.86	0.53 ± 0.11	0.54 ± 0.19
apices	30 min	cold + low light	cry2	3.55 ± 1.46	20.35 ± 16.51	26.63 ± 11.43	88.49 ± 47.10	89.31 ± 11.62	0.51 ± 0.31	9.40 ± 2.70	4.25 ± 0.22	1.65 ± 0.22	1.15 ± 0.17	12.19 ± 9.13	1.04 ± 0.63	1.47 ± 0.56	13.26 ± 3.00	0.63 ± 0.38	16.38 ± 5.69	1.51 ± 0.01	1.44 ± 1.03	2.81 ± 1.36	7.55 ± 5.73	24.05 ± 18.97	4.42 ± 3.67	1.67 ± 0.35	7.03 ± 4.22	69.67 ± 11.45	4.13 ± 1.92	4.65 ± 0.17	0.61 ± 0.39
apices	30 min	cold + low light	phyA	14.89 ± 7.78	44.43 ± 16.42	102.16 ± 36.07	174.05 ± 41.73	183.12 ± 33.90	0.36 ± 0.02	27.28 ± 7.13	10.41 ± 2.76	11.50 ± 5.14	2.23 ± 0.62	4.91 ± 1.50	0.40 ± 0.04	2.14 ± 0.60	7.41 ± 3.73	0.92 ± 0.34	11.96 ± 5.08	2.19 ± 0.84	1.93 ± 0.17	3.56 ± 0.94	13.65 ± 5.63	132.08 ± 44.78	8.42 ± 6.72	5.71 ± 0.99	7.56 ± 1.18	77.17 ± 35.43	10.39 ± 3.54	15.89 ± 8.06	1.99 ± 0.33
apices	30 min	cold + low light	phyB	28.37 ± 9.32	29.89 ± 9.42	166.00 ± 8.14	252.02 ± 18.85	233.26 ± 11.75	0.09 ± 0.05	63.87 ± 16.78	15.23 ± 6.90	40.30 ± 0.06	8.83 ± 1.92	50.81 ± 23.55	33.37 ± 18.01	9.04 ± 2.02	3.37 ± 0.28	0.87 ± 0.52	7.13 ± 0.01	1.46 ± 0.04	6.45 ± 0.08	4.20 ± 0.97	25.12 ± 5.76	431.41 ± 82.85	9.14 ± 7.72	5.96 ± 1.25	94.28 ± 9.22	28.00 ± 9.08	19.04 ± 3.75	10.13 ± 0.37	6.87 ± 3.33
apices	6 h	control	WT	7.52 ± 3.54	3.01 ± 1.81	0.61 ± 0.40	0.60 ± 0.24	2.98 ± 2.29	0.05 ± 0.00	2.38 ± 1.31	18.25 ± 12.47	0.30 ± 0.18	2.39 ± 1.51	2.66 ± 1.05	0.35 ± 0.12	0.15 ± 0.10	0.70 ± 0.34	0.61 ± 0.17	1.16 ± 0.56	1.17 ± 0.77	0.71 ± 0.29	0.37 ± 0.18	28.00 ± 16.80	10.63 ± 1.40	2.30 ± 1.38	0.78 ± 0.34	1.99 ± 0.01	1.31 ± 0.78	0.45 ± 0.27	0.24 ± 0.17	0.41 ± 0.25
apices	6 h	control	cry1	3.96 ± 1.41	5.10 ± 3.77	0.73 ± 0.46	0.44 ± 0.34	3.86 ± 1.42	0.01 ± 0.01	1.99 ± 1.38	20.32 ± 4.45	0.91 ± 0.53	1.54 ± 1.12	2.12 ± 0.78	0.58 ± 0.09	0.44 ± 0.25	0.32 ± 0.24	0.41 ± 0.25	0.83 ± 0.45	1.44 ± 0.44	1.36 ± 0.40	0.60 ± 0.17	33.55 ± 19.00	5.69 ± 1.68	2.34 ± 2.06	1.02 ± 0.25	0.69 ± 0.28	1.63 ± 0.04	1.01 ± 0.79	1.23 ± 0.50	1.10 ± 0.59
apices	6 h	control	cry2	3.30 ± 0.14	11.87 ± 7.89	0.71 ± 0.41	0.38 ± 0.23	5.08 ± 1.90	0.05 ± 0.04	5.51 ± 0.83	10.63 ± 5.06	1.25 ± 0.63	2.29 ± 1.43	2.46 ± 0.32	0.42 ± 0.25	0.16 ± 0.09	2.92 ± 1.62	0.69 ± 0.46	4.24 ± 1.79	1.33 ± 0.49	2.05 ± 0.99	0.56 ± 0.38	24.34 ± 10.14	7.40 ± 5.38	1.17 ± 0.02	0.80 ± 0.48	1.02 ± 0.75	3.24 ± 1.30	0.29 ± 0.21	1.07 ± 0.23	0.27 ± 0.16
apices	6 h	control	phyA	2.52 ± 1.09	7.33 ± 3.34	0.37 ± 0.15	0.57 ± 0.18	4.96 ± 2.36	0.05 ± 0.02	3.79 ± 2.70	10.84 ± 8.71	0.81 ± 0.27	1.51 ± 1.04	2.55 ± 2.22	0.16 ± 0.12	0.28 ± 0.18	0.93 ± 0.71	0.43 ± 0.24	1.70 ± 1.22	0.97 ± 0.59	2.67 ± 1.12	0.85 ± 0.41	44.95 ± 16.73	5.40 ± 1.37	0.48 ± 0.34	1.28 ± 0.95	1.18 ± 0.23	3.75 ± 1.25	0.53 ± 0.06	0.50 ± 0.35	0.33 ± 0.23
apices	6 h	control	phyB	10.00 ± 2.36	6.15 ± 1.12	0.36 ± 0.27	0.21 ± 0.08	4.97 ± 4.18	0.04 ± 0.02	1.94 ± 1.70	16.03 ± 2.17	0.52 ± 0.15	1.08 ± 0.57	2.77 ± 0.90	0.05 ± 0.00	0.95 ± 0.04	0.82 ± 0.28	0.41 ± 0.33	0.75 ± 0.50	0.94 ± 0.41	0.73 ± 0.23	0.27 ± 0.02	41.28 ± 14.57	8.51 ± 4.17	1.19 ± 0.58	0.69 ± 0.43	0.31 ± 0.19	2.62 ± 1.11	0.14 ± 0.06	0.51 ± 0.34	0.05 ± 0.02
apices	6 h	low light	WT	63.34 ± 22.03	33.98 ± 10.94	3.10 ± 0.59	1.78 ± 0.48	18.60 ± 4.94	0.39 ± 0.25	45.70 ± 20.00	60.36 ± 35.40	0.66 ± 0.29	3.73 ± 0.85	2.85 ± 1.71	0.65 ± 0.39	0.43 ± 0.09	7.11 ± 4.36	1.08 ± 0.20	2.79 ± 2.04	3.52 ± 0.75	6.58 ± 2.04	5.55 ± 1.74	170.42 ± 70.33	23.41 ± 16.17	37.89 ± 17.32	8.72 ± 4.10	7.49 ± 3.73	40.54 ± 26.76	3.69 ± 1.96	8.01 ± 4.65	1.72 ± 1.01
apices	6 h	low light	cry1	80.91 ± 51.82	30.13 ± 19.71	0.94 ± 0.33	0.26 ± 0.08	1.34 ± 0.21	0.04 ± 0.01	21.05 ± 1.17	31.85 ± 2.86	2.87 ± 0.45	1.25 ± 0.37	5.03 ± 0.26	0.37 ± 0.27	0.48 ± 0.04	3.33 ± 1.32	2.80 ± 0.35	0.87 ± 0.14	1.34 ± 0.10	0.74 ± 0.29	0.57 ± 0.08	40.22 ± 24.13	20.66 ± 9.30	22.42 ± 2.70	5.78 ± 2.51	8.08 ± 4.06	32.07 ± 18.64	2.53 ± 0.64	9.15 ± 1.70	1.04 ± 0.39
apices	6 h	low light	cry2	69.37 ± 18.09	40.55 ± 4.09	1.37 ± 0.94	0.19 ± 0.08	2.52 ± 0.01	0.04 ± 0.00	19.32 ± 5.70	23.16 ± 1.26	1.07 ± 0.11	0.66 ± 0.05	2.64 ± 1.59	0.35 ± 0.10	0.39 ± 0.03	3.89 ± 1.14	1.72 ± 0.74	0.77 ± 0.08	0.68 ± 0.28	0.35 ± 0.06	0.65 ± 0.17	22.56 ± 4.78	21.83 ± 9.86	7.43 ± 5.47	6.83 ± 0.15	6.16 ± 0.66	15.06 ± 3.68	3.89 ± 1.20	8.58 ± 1.50	0.80 ± 0.44
apices	6 h	low light	phyA	14.61 ± 4.54	11.95 ± 6.49	2.59 ± 1.65	0.80 ± 0.47	3.35 ± 2.57	0.03 ± 0.00	16.94 ± 6.41	20.24 ± 5.08	1.65 ± 0.69	1.19 ± 0.27	4.06 ± 1.04	0.72 ± 0.40	0.49 ± 0.20	1.28 ± 0.39	0.55 ± 0.20	0.97 ± 0.40	0.81 ± 0.16	0.74 ± 0.28	0.66 ± 0.25	22.18 ± 3.63	16.13 ± 11.40	12.23 ± 3.59	3.47 ± 1.46	5.57 ± 1.71	13.93 ± 5.84	2.38 ± 0.79	4.46 ± 1.83	1.00 ± 0.56
apices	6 h	low light	phyB	105.78 ± 22.57	29.51 ± 6.59	3.09 ± 0.95	0.70 ± 0.28	10.06 ± 1.65	0.10 ± 0.04	14.59 ± 4.37	10.58 ± 2.12	2.54 ± 0.42	0.82 ± 0.47	4.29 ± 0.73	1.26 ± 0.39	3.00 ± 0.40	3.13 ± 1.82	0.90 ± 0.65	0.68 ± 0.50	1.01 ± 0.27	0.90 ± 0.34	0.67 ± 0.37	51.77 ± 29.17	72.77 ± 28.09	9.38 ± 5.54	3.55 ± 1.13	3.76 ± 2.57	17.39 ± 11.99	1.49 ± 0.44	4.61 ± 0.60	1.24 ± 0.54
apices	6 h	cold	WT	504.95 ± 302.97	213.29 ± 118.05	9.03 ± 4.35	17.92 ± 11.26	261.94 ± 157.16	1.76 ± 1.22	5.90 ± 3.76	2.86 ± 0.74	9.11 ± 2.65	2.59 ± 0.64	9.21 ± 1.95	0.53 ± 0.20	0.44 ± 0.33	2.46 ± 1.56	0.47 ± 0.24	7.21 ± 5.92	0.91 ± 0.28	10.53 ± 8.09	5.46 ± 1.09	2 082.26 ± 1 556.69	267.23 ± 106.44	3.12 ± 0.73	0.43 ± 0.05	15.14 ± 9.08	36.93 ± 31.00	0.64 ± 0.39	0.83 ± 0.20	1.14 ± 0.68
apices	6 h	cold	cry1	75.98 ± 45.59	387.20 ± 225.39	9.12 ± 2.83	27.88 ± 13.86	218.51 ± 67.54	0.64 ± 0.24	2.80 ± 0.48	9.50 ± 1.13	2.03 ± 1.76	1.39 ± 0.52	1.54 ± 0.55	0.45 ± 0.08	0.86 ± 0.25	1.48 ± 0.43	0.43 ± 0.28	18.26 ± 3.67	2.80 ± 0.60	8.34 ± 0.73	6.84 ± 1.40	3 299.12 ± 1 467.35	84.29 ± 51.56	1.84 ± 0.65	2.22 ± 0.26	4.72 ± 1.49	15.26 ± 3.59	0.43 ± 0.32	1.38 ± 0.92	2.08 ± 0.62
apices	6 h	cold	cry2	332.75 ± 181.80	273.74 ± 125.71	7.70 ± 2.14	24.31 ± 4.67	315.17 ± 172.14	2.28 ± 0.56	2.35 ± 1.19	2.48 ± 0.20	8.00 ± 0.75	1.94 ± 0.02	1.88 ± 0.17	0.44 ± 0.26	0.29 ± 0.14	3.09 ± 1.20	0.26 ± 0.22	6.95 ± 2.54	1.64 ± 0.37	13.36 ± 5.66	3.83 ± 0.70	7 489.22 ± 2 209.57	70.45 ± 24.89	3.00 ± 2.57	0.69 ± 0.16	15.23 ± 2.25	33.82 ± 2.46	0.33 ± 0.03	3.47 ± 0.55	3.08 ± 1.36
apices	6 h	cold	phyA	178.73 ± 107.24	315.90 ± 97.21	10.96 ± 1.67	28.18 ± 5.92	286.69 ± 76.57	2.86 ± 1.02	4.77 ± 1.46	3.00 ± 1.14	4.95 ± 1.41	2.12 ± 0.70	4.35 ± 0.04	0.32 ± 0.19	0.29 ± 0.14	1.83 ± 0.96	0.51 ± 0.37	3.13 ± 0.79	1.15 ± 0.08	18.51 ± 1.70	7.34 ± 1.38	6 549.94 ± 3 120.77	142.55 ± 101.84	5.22 ± 1.99	0.80 ± 0.61	19.50 ± 2.75	48.39 ± 24.92	0.68 ± 0.48	4.70 ± 0.86	4.67 ± 0.95
apices	6 h	cold	phyB	78.86 ± 44.34	107.57 ± 84.48	17.63 ± 12.53	20.42 ± 9.48	248.16 ± 104.20	2.06 ± 1.59	4.45 ± 3.42	1.45 ± 0.50	2.48 ± 0.41	1.00 ± 0.66	1.26 ± 0.81	0.50 ± 0.39	0.18 ± 0.12	0.49 ± 0.23	0.24 ± 0.09	2.89 ± 1.72	1.18 ± 0.11	17.70 ± 7.11	5.19 ± 3.79	5 832.91 ± 3 294.04	192.23 ± 33.75	1.96 ± 1.56	0.28 ± 0.17	7.72 ± 5.36	23.82 ± 10.06	1.56 ± 0.36	1.55 ± 0.71	1.35 ± 0.61
apices	6 h	cold + low light	WT	372.85 ± 223.71	287.30 ± 188.98	32.09 ± 19.26	15.19 ± 9.12	199.71 ± 120.73	1.75 ± 0.63	9.19 ± 6.11	2.58 ± 0.14	5.14 ± 3.08	1.68 ± 0.40	12.15 ± 3.93	0.65 ± 0.19	0.67 ± 0.56	2.03 ± 1.10	0.03 ± 0.00	4.32 ± 2.99	2.08 ± 0.92	8.74 ± 3.41	11.56 ± 0.57	1 341.84 ± 805.11	262.29 ± 10.00	1.03 ± 0.52	0.32 ± 0.18	19.00 ± 11.40	47.13 ± 4.25	0.79 ± 0.23	6.31 ± 3.51	4.85 ± 1.57
apices	6 h	cold + low light	cry1	930.35 ± 412.83	1 555.68 ± 539.50	16.13 ± 2.75	34.14 ± 3.78	155.78 ± 31.77	0.91 ± 0.32	10.34 ± 5.42	10.85 ± 4.53	29.11 ± 5.16	2.23 ± 0.40	10.22 ± 3.80	1.51 ± 0.06	1.33 ± 0.45	6.50 ± 1.15	0.06 ± 0.05	15.97 ± 3.04	1.84 ± 0.34	8.40 ± 0.91	22.32 ± 3.57	1 983.64 ± 342.84	539.43 ± 214.69	0.81 ± 0.49	0.99 ± 0.42	11.59 ± 3.04	96.78 ± 13.50	0.74 ± 0.03	7.71 ± 3.07	5.55 ± 3.47
apices	6 h	cold + low light	cry2	439.96 ± 54.52	963.27 ± 350.79	30.27 ± 16.28	13.57 ± 1.10	96.05 ± 59.08	1.60 ± 0.59	14.24 ± 12.00	1.65 ± 0.97	38.39 ± 29.75	4.25 ± 0.09	9.97 ± 1.46	0.35 ± 0.21	1.87 ± 0.63	2.95 ± 1.77	0.03 ± 0.01	4.50 ± 0.98	2.15 ± 0.01	13.45 ± 2.51	14.51 ± 3.90	2 666.81 ± 1 388.03	785.75 ± 262.56	1.34 ± 0.80	0.22 ± 0.05	27.55 ± 15.20	65.00 ± 23.56	0.67 ± 0.11	3.67 ± 1.91	7.01 ± 3.17
apices	6 h	cold + low light	phyA	1 881.22 ± 645.46	962.07 ± 338.34	25.19 ± 3.68	33.98 ± 15.67	131.29 ± 28.07	2.78 ± 1.49	15.21 ± 5.84	7.01 ± 3.12	44.22 ± 6.24	2.86 ± 0.41	10.11 ± 6.58	0.78 ± 0.42	1.31 ± 0.52	7.48 ± 2.63	0.17 ± 0.04	10.93 ± 3.41	1.42 ± 0.11	12.36 ± 0.91	23.05 ± 6.39	3 214.99 ± 641.75	1 013.41 ± 242.34	3.14 ± 1.75	0.78 ± 0.24	34.98 ± 9.84	106.15 ± 14.33	1.07 ± 0.64	21.91 ± 7.22	24.31 ± 8.69
apices	6 h	cold + low light	phyB	734.81 ± 116.52	397.30 ± 223.29	9.92 ± 4.41	13.65 ± 1.20	69.17 ± 41.50	1.91 ± 1.04	10.73 ± 6.68	4.03 ± 1.48	6.86 ± 2.53	0.82 ± 0.61	10.14 ± 4.46	0.38 ± 0.15	1.08 ± 0.18	3.28 ± 1.15	0.06 ± 0.04	1.87 ± 0.35	1.72 ± 1.46	7.11 ± 4.27	7.56 ± 6.10	229.99 ± 179.01	689.29 ± 272.31	1.23 ± 0.79	0.27 ± 0.07	11.14 ± 6.68	70.45 ± 19.76	1.19 ± 0.36	10.14 ± 3.67	3.89 ± 1.47
apices	7 d	control	WT	21.84 ± 0.82	6.49 ± 2.69	0.10 ± 0.04	0.34 ± 0.21	1.21 ± 0.49	1.02 ± 0.72	20.13 ± 8.77	7.45 ± 2.17	0.35 ± 0.21	1.28 ± 0.77	12.67 ± 6.00	0.19 ± 0.12	1.41 ± 0.66	7.94 ± 2.15	0.24 ± 0.07	5.17 ± 3.49	1.63 ± 0.27	4.55 ± 1.38	1.35 ± 0.55	111.59 ± 43.77	24.66 ± 13.52	80.60 ± 54.84	9.58 ± 5.40	5.10 ± 0.61	13.26 ± 4.51	7.41 ± 3.10	8.27 ± 5.45	6.60 ± 2.00
apices	7 d	control	cry1	12.72 ± 7.50	5.37 ± 2.12	0.12 ± 0.07	0.25 ± 0.13	0.30 ± 0.20	0.68 ± 0.25	35.99 ± 10.14	4.99 ± 2.46	1.11 ± 0.49	1.30 ± 0.41	3.03 ± 1.76	0.56 ± 0.23	1.63 ± 1.10	2.70 ± 1.69	1.72 ± 1.14	2.81 ± 1.00	2.87 ± 0.69	4.31 ± 1.63	0.75 ± 0.37	77.98 ± 35.91	5.18 ± 3.11	34.24 ± 20.55	5.88 ± 2.27	9.09 ± 1.95	13.19 ± 5.32	1.85 ± 0.79	4.33 ± 2.95	1.60 ± 0.76
apices	7 d	control	cry2	19.92 ± 12.07	9.00 ± 3.82	0.32 ± 0.25	0.58 ± 0.27	0.47 ± 0.19	1.06 ± 0.60	8.65 ± 4.37	5.44 ± 1.73	1.56 ± 1.25	1.37 ± 0.42	3.87 ± 2.31	1.03 ± 0.55	1.43 ± 0.33	6.83 ± 3.66	1.43 ± 0.90	2.80 ± 1.67	1.85 ± 0.85	4.68 ± 2.24	0.73 ± 0.27	67.88 ± 43.49	17.20 ± 6.79	52.07 ± 33.74	6.24 ± 2.34	5.83 ± 1.78	22.46 ± 8.30	2.18 ± 0.43	10.67 ± 4.04	1.73 ± 0.49
apices	7 d	control	phyA	16.33 ± 1.66	26.32 ± 8.40	0.36 ± 0.11	0.56 ± 0.09	0.75 ± 0.26	1.96 ± 0.96	28.37 ± 18.33	10.75 ± 5.06	0.61 ± 0.28	2.99 ± 1.13	5.65 ± 2.88	0.13 ± 0.06	2.11 ± 0.94	8.83 ± 3.94	4.88 ± 2.52	8.84 ± 4.46	3.00 ± 1.36	1.43 ± 0.88	1.99 ± 1.09	43.31 ± 37.90	16.53 ± 14.39	95.11 ± 48.94	7.74 ± 4.67	13.50 ± 1.45	39.77 ± 18.57	1.99 ± 0.48	7.59 ± 3.74	1.20 ± 0.50
apices	7 d	control	phyB	36.23 ± 14.91	19.95 ± 12.68	0.18 ± 0.11	0.41 ± 0.23	3.82 ± 2.29	2.67 ± 1.38	30.12 ± 6.48	4.96 ± 1.35	1.75 ± 1.42	1.03 ± 0.25	5.01 ± 1.81	0.20 ± 0.12	4.06 ± 1.66	8.27 ± 3.75	2.68 ± 1.08	2.80 ± 1.45	1.33 ± 0.50	5.07 ± 1.92	1.23 ± 0.63	173.04 ± 50.61	45.97 ± 20.93	97.44 ± 70.99	7.53 ± 3.59	8.02 ± 0.79	16.13 ± 7.08	2.44 ± 0.83	7.53 ± 2.51	1.57 ± 0.81
apices	7 d	low light	WT	0.97 ± 0.66	4.96 ± 2.01	0.04 ± 0.02	0.33 ± 0.20	0.09 ± 0.06	0.27 ± 0.20	4.13 ± 1.42	6.96 ± 2.61	0.34 ± 0.15	0.54 ± 0.37	0.59 ± 0.36	0.22 ± 0.17	0.12 ± 0.05	2.05 ± 0.70	1.35 ± 0.65	0.77 ± 0.39	0.58 ± 0.25	0.42 ± 0.25	0.12 ± 0.07	11.10 ± 3.86	4.48 ± 3.45	1.09 ± 0.35	0.31 ± 0.13	0.75 ± 0.39	13.56 ± 7.07	0.65 ± 0.32	1.39 ± 0.61	0.12 ± 0.01
apices	7 d	low light	cry1	6.94 ± 3.52	15.29 ± 6.88	0.08 ± 0.05	0.05 ± 0.04	0.10 ± 0.02	0.14 ± 0.04	7.79 ± 4.86	24.11 ± 8.72	0.89 ± 0.25	1.40 ± 0.78	0.81 ± 0.72	0.41 ± 0.25	0.64 ± 0.18	3.34 ± 2.01	3.66 ± 1.66	2.01 ± 0.89	0.75 ± 0.20	0.44 ± 0.14	0.40 ± 0.12	7.62 ± 4.31	5.82 ± 2.97	5.68 ± 4.36	1.37 ± 0.75	3.17 ± 0.88	19.25 ± 2.73	1.21 ± 0.64	2.65 ± 1.04	0.22 ± 0.13
apices	7 d	low light	cry2	8.00 ± 4.80	7.79 ± 4.47	0.01 ± 0.00	0.04 ± 0.04	0.09 ± 0.03	0.11 ± 0.03	2.62 ± 1.40	13.44 ± 5.64	0.50 ± 0.19	1.34 ± 0.92	0.72 ± 0.41	0.46 ± 0.20	0.33 ± 0.17	4.73 ± 2.68	3.10 ± 2.06	1.37 ± 0.62	0.82 ± 0.43	0.30 ± 0.07	0.25 ± 0.15	11.76 ± 7.05	4.00 ± 2.00	8.26 ± 5.40	2.10 ± 1.20	2.33 ± 1.21	17.77 ± 6.44	1.08 ± 0.90	2.52 ± 1.43	0.29 ± 0.16
apices	7 d	low light	phyA	5.23 ± 3.14	5.78 ± 3.08	0.03 ± 0.02	0.20 ± 0.05	0.04 ± 0.03	0.21 ± 0.10	8.31 ± 2.70	6.41 ± 3.46	2.10 ± 1.45	0.72 ± 0.27	0.75 ± 0.45	0.30 ± 0.14	0.21 ± 0.09	2.89 ± 1.45	1.60 ± 1.04	0.45 ± 0.22	0.75 ± 0.38	0.29 ± 0.13	0.13 ± 0.04	10.47 ± 7.93	5.60 ± 3.89	5.79 ± 3.47	1.17 ± 0.76	1.65 ± 0.81	21.50 ± 9.89	0.76 ± 0.46	3.06 ± 2.46	0.15 ± 0.12
apices	7 d	low light	phyB	5.36 ± 3.22	7.87 ± 4.72	0.00 ± 0.00	0.09 ± 0.05	0.09 ± 0.05	0.19 ± 0.11	3.33 ± 2.00	3.08 ± 1.85	10.23 ± 6.14	1.27 ± 0.76	0.15 ± 0.09	0.52 ± 0.31	1.06 ± 0.63	1.07 ± 0.64	1.37 ± 0.82	0.48 ± 0.29	0.47 ± 0.28	0.45 ± 0.27	0.09 ± 0.06	13.36 ± 8.02	24.42 ± 14.65	3.77 ± 2.26	0.75 ± 0.45	1.01 ± 0.60	11.12 ± 6.67	0.24 ± 0.15	0.79 ± 0.48	0.06 ± 0.04
apices	7 d	cold	WT	47.04 ± 6.84	11.29 ± 1.89	0.67 ± 0.11	1.79 ± 0.26	4.06 ± 0.21	0.20 ± 0.06	7.78 ± 1.29	1.56 ± 0.12	0.39 ± 0.18	2.06 ± 0.54	4.73 ± 0.46	0.19 ± 0.06	0.44 ± 0.10	3.27 ± 0.81	0.28 ± 0.16	4.90 ± 1.02	0.93 ± 0.16	6.41 ± 0.48	2.03 ± 0.32	6.41 ± 3.13	18.51 ± 10.31	22.13 ± 1.78	1.27 ± 0.16	2.75 ± 0.42	8.45 ± 2.33	2.52 ± 0.23	4.29 ± 0.64	2.13 ± 0.91
apices	7 d	cold	cry1	143.65 ± 52.28	21.24 ± 9.63	26.03 ± 3.22	5.99 ± 1.52	13.27 ± 2.82	0.11 ± 0.03	48.84 ± 6.64	7.31 ± 2.82	13.09 ± 1.91	11.18 ± 3.11	4.89 ± 1.14	12.92 ± 2.24	2.93 ± 0.75	5.39 ± 3.22	0.36 ± 0.12	1.90 ± 0.75	3.12 ± 1.09	6.63 ± 1.80	2.13 ± 0.58	111.59 ± 19.13	8.56 ± 5.11	23.08 ± 7.43	5.63 ± 1.64	25.35 ± 6.26	19.74 ± 8.47	3.18 ± 0.69	10.47 ± 3.03	4.88 ± 1.53
apices	7 d	cold	cry2	40.63 ± 20.35	19.33 ± 16.68	5.35 ± 2.03	2.54 ± 1.08	9.90 ± 4.10	0.41 ± 0.28	17.27 ± 7.13	5.01 ± 2.01	6.44 ± 2.96	7.05 ± 2.62	5.87 ± 1.17	6.44 ± 3.97	2.19 ± 1.34	6.58 ± 4.97	0.48 ± 0.31	3.02 ± 2.13	1.53 ± 0.25	11.98 ± 2.96	3.35 ± 1.19	75.50 ± 43.81	6.01 ± 3.61	7.14 ± 4.46	2.60 ± 1.28	16.75 ± 4.20	10.45 ± 5.76	3.30 ± 1.29	4.39 ± 3.49	5.73 ± 3.00
apices	7 d	cold	phyA	60.76 ± 43.13	17.47 ± 2.75	25.36 ± 11.07	4.27 ± 2.20	1.53 ± 0.92	0.16 ± 0.09	31.34 ± 18.70	5.68 ± 3.01	4.07 ± 2.83	3.96 ± 2.38	1.22 ± 0.32	16.38 ± 1.65	1.03 ± 0.29	4.25 ± 1.86	0.29 ± 0.07	1.38 ± 0.51	1.65 ± 0.14	4.81 ± 0.51	2.39 ± 1.08	38.69 ± 22.94	6.74 ± 2.23	3.66 ± 1.52	3.90 ± 1.79	7.32 ± 0.97	7.52 ± 1.70	0.99 ± 0.11	4.31 ± 2.86	1.47 ± 0.64
apices	7 d	cold	phyB	64.30 ± 36.63	18.46 ± 9.46	0.91 ± 0.56	1.31 ± 0.46	1.83 ± 0.94	0.15 ± 0.11	12.63 ± 7.23	3.99 ± 1.65	2.25 ± 0.65	1.97 ± 0.58	2.28 ± 0.63	1.71 ± 1.52	0.84 ± 0.28	2.02 ± 1.75	0.13 ± 0.09	0.75 ± 0.44	0.87 ± 0.18	3.90 ± 1.13	1.43 ± 0.31	8.06 ± 4.83	8.12 ± 5.30	1.97 ± 0.75	1.05 ± 0.33	6.54 ± 3.79	12.54 ± 10.79	0.62 ± 0.28	4.12 ± 3.36	0.80 ± 0.17
apices	7 d	cold + low light	WT	103.10 ± 53.01	23.56 ± 14.65	1.13 ± 0.43	3.60 ± 1.48	6.35 ± 1.40	0.24 ± 0.09	13.66 ± 5.16	3.48 ± 1.30	2.24 ± 1.34	1.65 ± 0.48	1.39 ± 0.83	0.49 ± 0.20	0.32 ± 0.12	3.43 ± 1.78	0.30 ± 0.15	3.91 ± 1.01	1.17 ± 0.48	2.22 ± 0.62	1.79 ± 0.48	13.28 ± 9.44	34.06 ± 23.25	11.76 ± 7.06	1.55 ± 0.68	2.63 ± 1.17	18.04 ± 9.75	1.52 ± 0.98	5.10 ± 1.92	0.76 ± 0.35
apices	7 d	cold + low light	cry1	261.53 ± 101.85	34.22 ± 9.67	1.02 ± 0.37	3.11 ± 1.04	2.38 ± 0.69	0.29 ± 0.15	25.23 ± 15.49	11.97 ± 3.40	6.36 ± 1.40	1.23 ± 0.43	1.76 ± 1.06	0.76 ± 0.03	1.36 ± 0.48	6.72 ± 2.14	0.64 ± 0.07	5.60 ± 1.55	1.78 ± 0.78	3.35 ± 1.14	3.53 ± 1.04	11.52 ± 2.43	17.16 ± 4.94	14.81 ± 9.83	7.88 ± 0.88	2.60 ± 1.82	41.02 ± 16.31	4.59 ± 0.68	20.99 ± 5.46	1.07 ± 0.10
apices	7 d	cold + low light	cry2	43.64 ± 26.68	10.08 ± 2.57	1.12 ± 0.35	3.03 ± 0.61	5.68 ± 1.23	0.38 ± 0.16	17.31 ± 5.37	7.43 ± 2.04	1.69 ± 1.02	2.15 ± 0.56	0.39 ± 0.20	0.66 ± 0.48	0.70 ± 0.09	6.90 ± 3.62	0.47 ± 0.17	1.76 ± 0.69	1.29 ± 0.41	3.12 ± 1.61	1.95 ± 0.46	23.61 ± 14.87	8.44 ± 3.57	2.42 ± 0.42	2.05 ± 0.99	2.55 ± 0.61	37.92 ± 11.22	0.89 ± 0.48	6.31 ± 2.87	0.28 ± 0.07
apices	7 d	cold + low light	phyA	93.54 ± 37.41	27.88 ± 7.25	1.18 ± 0.47	4.21 ± 0.47	4.53 ± 1.41	0.44 ± 0.23	12.09 ± 2.43	4.28 ± 0.55	4.05 ± 0.77	4.56 ± 1.53	11.60 ± 1.05	0.43 ± 0.26	1.31 ± 0.79	16.71 ± 0.35	0.54 ± 0.32	3.30 ± 0.85	2.40 ± 0.15	3.51 ± 1.29	4.57 ± 1.80	32.22 ± 1.79	13.50 ± 11.93	3.69 ± 0.84	5.65 ± 2.11	5.14 ± 2.55	29.35 ± 5.90	3.14 ± 1.12	5.67 ± 0.96	0.71 ± 0.11
apices	7 d	cold + low light	phyB	68.24 ± 30.74	33.44 ± 12.95	2.44 ± 0.22	4.90 ± 1.04	6.53 ± 2.83	0.39 ± 0.06	20.49 ± 11.66	7.77 ± 2.14	7.71 ± 3.76	7.71 ± 0.48	8.00 ± 1.93	0.36 ± 0.09	0.47 ± 0.12	7.52 ± 2.02	0.41 ± 0.18	3.58 ± 0.94	1.05 ± 0.36	2.22 ± 0.45	1.37 ± 0.63	18.18 ± 2.62	42.87 ± 25.72	6.28 ± 3.77	5.21 ± 2.67	8.35 ± 2.95	37.01 ± 18.00	4.13 ± 2.38	3.43 ± 1.09	0.47 ± 0.09
leaves	30 min	control	WT	1.00 ± 0.53	1.00 ± 0.52	1.00 ± 0.28	1.00 ± 0.24	1.00 ± 0.41	1.00 ± 0.50	1.00 ± 0.79	1.00 ± 0.47	1.00 ± 0.60	1.00 ± 0.55	1.00 ± 0.56	1.00 ± 0.55	1.00 ± 0.65	1.00 ± 0.87	1.00 ± 0.31	1.00 ± 0.43	1.00 ± 0.23	1.00 ± 0.72	1.00 ± 0.61	1.00 ± 0.50	1.00 ± 0.50	1.00 ± 0.60	1.00 ± 0.33	1.00 ± 0.35	1.00 ± 0.58	1.00 ± 0.47	1.00 ± 0.42	1.00 ± 0.37
leaves	30 min	control	cry1	5.82 ± 2.50	0.31 ± 0.06	1.18 ± 0.87	0.16 ± 0.10	0.20 ± 0.14	0.65 ± 0.43	0.35 ± 0.12	1.14 ± 0.71	0.86 ± 0.36	0.97 ± 0.63	0.33 ± 0.09	0.42 ± 0.32	0.31 ± 0.22	0.49 ± 0.29	0.89 ± 0.25	0.83 ± 0.32	1.03 ± 0.62	0.60 ± 0.49	0.36 ± 0.28	0.30 ± 0.13	0.23 ± 0.17	1.38 ± 0.96	0.42 ± 0.26	1.00 ± 0.79	0.42 ± 0.16	0.42 ± 0.21	1.75 ± 1.15	0.69 ± 0.39
leaves	30 min	control	cry2	3.93 ± 0.70	1.36 ± 0.54	3.03 ± 2.69	0.97 ± 0.51	1.33 ± 0.75	0.67 ± 0.22	0.99 ± 0.79	0.73 ± 0.25	1.54 ± 1.03	0.69 ± 0.38	0.47 ± 0.20	1.17 ± 0.70	1.77 ± 0.65	1.49 ± 0.97	0.98 ± 0.58	0.75 ± 0.27	0.68 ± 0.47	0.91 ± 0.55	1.19 ± 0.72	1.28 ± 0.88	1.02 ± 0.35	1.52 ± 0.70	1.08 ± 0.35	5.40 ± 2.62	1.15 ± 0.66	1.16 ± 0.76	2.58 ± 1.55	1.75 ± 0.93
leaves	30 min	control	phyA	3.06 ± 0.86	0.54 ± 0.33	2.13 ± 0.63	0.38 ± 0.15	0.39 ± 0.23	0.53 ± 0.11	1.32 ± 0.49	0.52 ± 0.29	1.88 ± 0.82	0.95 ± 0.43	0.83 ± 0.54	0.49 ± 0.22	0.72 ± 0.26	2.32 ± 0.75	0.47 ± 0.18	0.50 ± 0.30	1.05 ± 0.53	0.78 ± 0.47	1.61 ± 0.76	0.89 ± 0.53	0.52 ± 0.29	2.96 ± 1.86	1.56 ± 0.59	3.15 ± 1.63	1.18 ± 0.23	1.78 ± 1.29	4.78 ± 2.87	2.29 ± 0.86
leaves	30 min	control	phyB	6.79 ± 5.98	0.50 ± 0.28	1.81 ± 1.08	0.70 ± 0.58	1.27 ± 1.02	0.30 ± 0.23	0.49 ± 0.10	0.21 ± 0.14	1.35 ± 0.81	0.12 ± 0.09	0.51 ± 0.21	1.29 ± 1.08	3.63 ± 1.77	1.18 ± 0.97	0.45 ± 0.30	0.36 ± 0.21	0.19 ± 0.09	0.33 ± 0.18	0.44 ± 0.37	1.18 ± 0.19	1.09 ± 0.68	1.73 ± 1.40	0.59 ± 0.24	1.17 ± 0.99	0.77 ± 0.29	1.02 ± 0.74	2.97 ± 2.58	1.02 ± 0.53
leaves	30 min	low light	WT	4.69 ± 3.21	2.42 ± 0.85	1.46 ± 1.09	0.74 ± 0.48	0.43 ± 0.30	0.31 ± 0.14	1.49 ± 0.55	0.81 ± 0.49	2.88 ± 1.60	0.09 ± 0.04	0.71 ± 0.26	0.68 ± 0.49	1.21 ± 0.49	7.64 ± 4.97	1.59 ± 0.40	0.46 ± 0.22	0.57 ± 0.25	0.29 ± 0.21	0.20 ± 0.12	0.70 ± 0.28	2.08 ± 1.48	3.88 ± 1.63	0.62 ± 0.20	0.50 ± 0.15	2.71 ± 0.87	1.29 ± 0.78	13.69 ± 3.94	0.99 ± 0.62
leaves	30 min	low light	cry1	41.08 ± 19.05	2.47 ± 0.57	1.90 ± 0.96	0.71 ± 0.32	0.55 ± 0.19	0.63 ± 0.21	4.32 ± 1.49	1.37 ± 0.41	3.80 ± 2.13	0.26 ± 0.07	2.93 ± 1.02	1.29 ± 0.60	2.32 ± 0.84	12.51 ± 2.92	2.68 ± 0.82	0.43 ± 0.20	0.74 ± 0.16	0.63 ± 0.15	0.50 ± 0.16	1.48 ± 0.82	4.49 ± 1.45	19.54 ± 11.90	3.71 ± 1.62	3.95 ± 2.00	6.96 ± 2.07	12.87 ± 9.87	35.44 ± 15.27	5.71 ± 3.07
leaves	30 min	low light	cry2	11.18 ± 3.94	1.38 ± 0.60	0.79 ± 0.51	0.28 ± 0.12	0.29 ± 0.15	0.31 ± 0.06	1.90 ± 0.35	0.70 ± 0.41	1.83 ± 0.83	0.41 ± 0.21	1.04 ± 0.48	0.91 ± 0.47	1.12 ± 0.29	6.03 ± 2.80	1.03 ± 0.49	0.13 ± 0.03	0.49 ± 0.15	0.35 ± 0.17	0.25 ± 0.12	0.68 ± 0.15	1.78 ± 0.48	6.92 ± 4.54	1.41 ± 0.41	1.59 ± 0.72	4.54 ± 1.31	4.26 ± 1.13	20.31 ± 6.59	2.21 ± 0.65
leaves	30 min	low light	phyA	10.33 ± 4.86	0.88 ± 0.38	2.22 ± 1.47	0.51 ± 0.28	0.24 ± 0.09	0.41 ± 0.14	2.57 ± 1.18	0.62 ± 0.33	4.40 ± 2.45	0.34 ± 0.11	3.17 ± 1.32	1.85 ± 1.28	2.49 ± 0.74	8.29 ± 2.76	1.26 ± 0.64	0.28 ± 0.13	0.79 ± 0.26	0.21 ± 0.03	0.15 ± 0.09	0.48 ± 0.34	1.27 ± 0.73	9.95 ± 3.37	1.42 ± 0.43	2.49 ± 0.67	4.67 ± 1.50	6.10 ± 2.50	26.45 ± 8.22	3.40 ± 1.65
leaves	30 min	low light	phyB	21.10 ± 2.63	0.91 ± 0.41	4.37 ± 2.21	0.81 ± 0.38	0.65 ± 0.21	0.84 ± 0.30	2.83 ± 0.23	1.05 ± 0.30	5.62 ± 2.53	0.38 ± 0.15	2.02 ± 0.54	1.44 ± 0.14	8.20 ± 2.27	6.28 ± 1.75	1.29 ± 0.24	0.19 ± 0.09	0.54 ± 0.17	0.52 ± 0.28	0.20 ± 0.08	0.73 ± 0.06	4.48 ± 1.91	15.18 ± 2.31	1.60 ± 0.17	2.02 ± 0.89	5.55 ± 0.56	7.65 ± 2.03	17.27 ± 7.17	3.24 ± 1.39
leaves	30 min	cold	WT	21.74 ± 4.30	3.49 ± 1.71	164.14 ± 98.92	31.96 ± 8.41	51.68 ± 28.41	0.38 ± 0.09	4.29 ± 1.54	1.49 ± 0.34	11.04 ± 6.32	0.81 ± 0.40	0.51 ± 0.17	0.62 ± 0.12	2.76 ± 0.62	8.76 ± 3.43	20.14 ± 6.64	1.72 ± 0.81	0.57 ± 0.29	0.99 ± 0.32	1.01 ± 0.40	0.55 ± 0.03	3.89 ± 3.18	8.02 ± 1.80	1.11 ± 0.35	0.62 ± 0.01	5.35 ± 2.22	0.77 ± 0.31	36.89 ± 16.54	1.11 ± 0.39
leaves	30 min	cold	cry1	13.21 ± 7.11	14.06 ± 4.48	1 177.77 ± 236.13	89.22 ± 52.13	209.27 ± 133.84	0.19 ± 0.08	10.12 ± 0.73	2.57 ± 0.01	47.36 ± 21.41	0.64 ± 0.29	1.71 ± 0.36	1.13 ± 0.68	4.94 ± 1.74	11.66 ± 3.06	30.14 ± 7.00	4.02 ± 0.51	1.19 ± 0.20	2.13 ± 0.26	1.32 ± 0.58	0.73 ± 0.39	30.01 ± 4.12	4.22 ± 3.10	0.41 ± 0.01	1.97 ± 0.62	6.15 ± 0.16	0.30 ± 0.18	56.79 ± 11.33	0.43 ± 0.21
leaves	30 min	cold	cry2	8.75 ± 6.68	12.67 ± 0.18	590.93 ± 125.24	127.49 ± 6.00	191.90 ± 118.08	0.29 ± 0.13	3.73 ± 1.28	3.02 ± 0.26	5.35 ± 1.73	0.72 ± 0.32	0.84 ± 0.69	0.63 ± 0.38	4.69 ± 0.54	12.63 ± 4.58	20.02 ± 1.74	1.64 ± 0.23	1.03 ± 0.17	0.25 ± 0.12	0.89 ± 0.54	0.65 ± 0.39	8.38 ± 6.32	1.29 ± 0.18	0.44 ± 0.04	1.24 ± 0.74	6.13 ± 0.33	0.18 ± 0.11	35.75 ± 21.45	0.44 ± 0.16
leaves	30 min	cold	phyA	5.08 ± 1.67	5.46 ± 2.83	180.19 ± 127.58	52.17 ± 19.44	80.72 ± 49.97	0.20 ± 0.10	4.65 ± 1.09	1.95 ± 1.02	11.77 ± 5.58	0.77 ± 0.25	0.72 ± 0.33	0.89 ± 0.36	1.86 ± 1.14	8.82 ± 4.53	19.87 ± 11.29	1.75 ± 0.37	0.79 ± 0.14	0.93 ± 0.26	1.50 ± 0.35	3.17 ± 1.74	3.15 ± 1.93	13.58 ± 1.84	1.05 ± 0.77	1.54 ± 0.10	5.34 ± 0.95	0.63 ± 0.49	23.92 ± 10.93	1.42 ± 0.83
leaves	30 min	cold	phyB	54.57 ± 32.74	5.44 ± 2.59	228.24 ± 88.62	40.66 ± 15.17	196.53 ± 97.12	0.36 ± 0.21	3.06 ± 1.61	1.26 ± 0.21	17.60 ± 13.32	0.37 ± 0.23	0.73 ± 0.38	1.47 ± 0.51	15.03 ± 6.97	5.13 ± 0.67	11.02 ± 7.53	0.83 ± 0.22	0.67 ± 0.18	1.72 ± 1.50	1.73 ± 0.59	1.72 ± 1.03	3.20 ± 1.92	5.09 ± 0.92	0.93 ± 0.47	0.87 ± 0.52	2.43 ± 0.58	0.77 ± 0.37	6.71 ± 5.79	1.46 ± 0.44
leaves	30 min	cold + low light	WT	19.39 ± 8.36	3.71 ± 1.94	144.90 ± 60.97	31.06 ± 15.28	55.14 ± 28.12	0.11 ± 0.07	3.32 ± 1.24	0.91 ± 0.56	39.97 ± 20.97	0.40 ± 0.24	0.55 ± 0.24	0.52 ± 0.25	3.86 ± 0.30	4.52 ± 2.71	10.28 ± 2.93	1.66 ± 1.11	0.63 ± 0.23	0.52 ± 0.31	1.51 ± 0.64	0.85 ± 0.64	5.98 ± 2.83	17.47 ± 14.26	1.25 ± 0.75	3.64 ± 1.46	4.48 ± 2.23	12.72 ± 7.63	20.20 ± 12.12	3.92 ± 2.69
leaves	30 min	cold + low light	cry1	10.79 ± 6.14	4.99 ± 1.33	302.77 ± 113.27	58.55 ± 29.70	92.30 ± 35.83	0.11 ± 0.03	3.79 ± 2.12	2.36 ± 0.58	28.87 ± 10.44	0.49 ± 0.13	0.77 ± 0.40	0.54 ± 0.09	5.44 ± 1.82	7.75 ± 2.68	8.10 ± 1.04	2.66 ± 0.41	0.94 ± 0.44	1.19 ± 0.55	1.23 ± 0.36	0.57 ± 0.30	18.46 ± 6.32	20.77 ± 5.46	3.43 ± 1.51	4.36 ± 2.17	5.13 ± 1.35	12.54 ± 6.65	37.57 ± 13.24	2.98 ± 0.19
leaves	30 min	cold + low light	cry2	17.84 ± 10.70	4.76 ± 2.59	260.24 ± 161.33	71.40 ± 41.42	89.62 ± 40.00	0.20 ± 0.11	3.87 ± 1.32	1.36 ± 0.44	40.51 ± 11.84	0.32 ± 0.14	0.99 ± 0.40	1.36 ± 0.40	3.23 ± 1.03	10.01 ± 4.17	3.12 ± 1.00	1.70 ± 0.65	0.60 ± 0.24	0.79 ± 0.32	0.93 ± 0.27	0.52 ± 0.28	9.71 ± 6.16	16.60 ± 8.74	1.58 ± 0.77	3.16 ± 1.52	4.24 ± 0.71	20.20 ± 9.19	34.95 ± 20.64	6.64 ± 3.05
leaves	30 min	cold + low light	phyA	11.66 ± 8.20	3.80 ± 1.89	203.33 ± 141.35	70.13 ± 30.05	90.37 ± 42.04	0.14 ± 0.09	3.98 ± 1.53	1.77 ± 0.41	33.83 ± 16.55	0.60 ± 0.27	1.19 ± 0.56	1.38 ± 0.69	4.13 ± 1.14	13.62 ± 4.97	3.94 ± 2.36	2.85 ± 1.44	1.17 ± 0.49	1.42 ± 0.93	1.65 ± 0.73	0.33 ± 0.16	9.58 ± 3.23	26.86 ± 12.70	3.75 ± 1.75	5.52 ± 2.87	4.81 ± 2.00	25.10 ± 10.95	43.32 ± 13.17	9.04 ± 3.66
leaves	30 min	cold + low light	phyB	4.09 ± 2.12	4.52 ± 1.43	314.40 ± 97.05	66.06 ± 18.14	76.39 ± 17.59	0.08 ± 0.04	3.22 ± 1.11	1.32 ± 0.30	13.82 ± 6.35	0.42 ± 0.19	0.31 ± 0.07	0.40 ± 0.21	8.21 ± 1.75	2.87 ± 0.93	1.63 ± 0.94	1.04 ± 0.39	0.50 ± 0.07	0.74 ± 0.19	0.75 ± 0.16	0.45 ± 0.23	15.02 ± 6.26	3.26 ± 2.46	0.73 ± 0.39	2.02 ± 1.46	2.32 ± 0.69	2.91 ± 1.75	13.95 ± 4.00	1.46 ± 0.81
leaves	6 h	control	WT	20.08 ± 1.67	2.43 ± 1.22	1.99 ± 0.97	0.31 ± 0.22	7.47 ± 5.70	0.01 ± 0.00	0.69 ± 0.44	0.99 ± 0.78	1.96 ± 0.68	0.30 ± 0.21	0.43 ± 0.27	0.42 ± 0.19	0.26 ± 0.15	1.27 ± 0.78	2.11 ± 1.81	0.20 ± 0.13	0.18 ± 0.07	0.96 ± 0.12	0.67 ± 0.37	1.85 ± 0.60	0.18 ± 0.08	3.17 ± 1.94	0.73 ± 0.13	0.41 ± 0.25	0.56 ± 0.21	1.15 ± 0.69	5.54 ± 3.32	0.64 ± 0.39
leaves	6 h	control	cry1	19.38 ± 11.63	2.02 ± 0.69	1.90 ± 0.81	0.68 ± 0.41	26.10 ± 14.27	0.01 ± 0.00	0.89 ± 0.65	1.35 ± 0.81	3.73 ± 0.48	0.22 ± 0.14	0.83 ± 0.55	0.41 ± 0.22	0.54 ± 0.35	1.30 ± 0.61	3.29 ± 2.42	0.74 ± 0.49	0.15 ± 0.08	1.16 ± 0.60	0.97 ± 0.69	1.20 ± 0.50	0.09 ± 0.06	4.24 ± 2.54	0.86 ± 0.39	1.02 ± 0.51	0.33 ± 0.28	0.69 ± 0.34	4.21 ± 3.03	0.58 ± 0.27
leaves	6 h	control	cry2	69.95 ± 30.18	3.69 ± 2.52	4.69 ± 2.72	0.44 ± 0.25	36.05 ± 15.35	0.02 ± 0.01	0.52 ± 0.38	0.95 ± 0.53	5.45 ± 3.91	0.60 ± 0.28	0.58 ± 0.46	1.85 ± 1.24	0.21 ± 0.10	4.44 ± 2.89	2.32 ± 0.62	0.37 ± 0.25	0.42 ± 0.25	2.23 ± 1.47	0.92 ± 0.57	1.55 ± 1.19	0.13 ± 0.06	2.58 ± 1.74	0.83 ± 0.38	1.05 ± 0.20	1.05 ± 0.50	1.31 ± 0.94	7.55 ± 6.22	0.52 ± 0.29
leaves	6 h	control	phyA	63.89 ± 38.33	4.96 ± 1.36	1.81 ± 0.82	0.32 ± 0.09	9.58 ± 5.39	0.01 ± 0.01	0.72 ± 0.27	1.32 ± 0.33	4.43 ± 1.22	0.54 ± 0.39	0.37 ± 0.04	1.60 ± 0.54	0.23 ± 0.10	1.24 ± 0.43	2.13 ± 0.35	0.34 ± 0.03	0.25 ± 0.09	2.24 ± 1.05	0.99 ± 0.30	1.21 ± 0.10	0.12 ± 0.05	5.01 ± 1.02	1.88 ± 0.74	0.42 ± 0.25	0.46 ± 0.17	1.10 ± 0.78	2.78 ± 0.34	0.30 ± 0.09
leaves	6 h	control	phyB	20.08 ± 12.05	7.46 ± 1.46	8.22 ± 6.65	1.06 ± 0.54	26.79 ± 7.41	0.07 ± 0.03	1.00 ± 0.30	2.20 ± 0.72	5.55 ± 4.03	0.52 ± 0.34	0.47 ± 0.10	1.81 ± 0.91	2.98 ± 1.65	4.26 ± 3.06	1.79 ± 0.56	0.74 ± 0.33	0.45 ± 0.28	2.78 ± 1.14	1.49 ± 0.91	5.57 ± 2.17	0.66 ± 0.58	4.98 ± 2.99	1.74 ± 1.25	1.77 ± 1.06	1.95 ± 0.32	0.67 ± 0.46	8.71 ± 4.87	0.48 ± 0.10
leaves	6 h	low light	WT	810.16 ± 445.65	27.44 ± 6.76	73.44 ± 26.31	3.94 ± 1.34	24.13 ± 4.49	0.07 ± 0.03	10.64 ± 3.01	8.85 ± 3.48	28.39 ± 9.64	0.40 ± 0.19	0.84 ± 0.11	2.32 ± 1.36	0.97 ± 0.58	12.94 ± 7.82	2.39 ± 1.11	0.48 ± 0.17	1.46 ± 0.35	0.86 ± 0.48	2.45 ± 1.10	2.98 ± 2.30	1.70 ± 0.95	24.14 ± 9.75	4.00 ± 2.48	6.49 ± 1.63	7.75 ± 2.94	9.09 ± 4.87	86.38 ± 10.84	8.53 ± 4.54
leaves	6 h	low light	cry1	954.99 ± 272.78	17.51 ± 3.68	24.49 ± 13.60	0.74 ± 0.55	2.40 ± 0.87	0.02 ± 0.01	4.17 ± 2.60	3.56 ± 1.62	11.21 ± 3.40	0.42 ± 0.21	0.65 ± 0.19	1.89 ± 0.61	1.20 ± 0.36	4.50 ± 2.03	1.73 ± 0.85	0.11 ± 0.05	1.07 ± 0.22	0.42 ± 0.26	0.71 ± 0.33	0.38 ± 0.25	2.21 ± 0.96	10.63 ± 5.33	3.66 ± 2.09	4.80 ± 1.67	3.57 ± 1.41	2.36 ± 0.20	12.41 ± 6.54	2.24 ± 0.67
leaves	6 h	low light	cry2	423.13 ± 98.29	16.97 ± 3.79	52.63 ± 23.63	1.34 ± 0.82	9.38 ± 5.94	0.02 ± 0.01	2.51 ± 1.18	5.08 ± 2.38	9.62 ± 3.37	0.31 ± 0.16	0.76 ± 0.23	3.54 ± 1.16	1.55 ± 0.79	9.90 ± 5.02	1.90 ± 0.81	0.11 ± 0.04	1.25 ± 0.26	1.06 ± 0.68	2.11 ± 0.82	0.39 ± 0.16	1.72 ± 0.45	7.56 ± 2.08	2.48 ± 1.41	5.15 ± 1.62	5.43 ± 2.54	3.63 ± 1.12	21.22 ± 8.63	3.31 ± 0.38
leaves	6 h	low light	phyA	373.34 ± 38.62	9.18 ± 2.89	43.22 ± 30.33	1.80 ± 1.10	7.68 ± 4.04	0.02 ± 0.01	3.71 ± 1.15	3.07 ± 1.07	19.40 ± 5.85	0.37 ± 0.09	0.67 ± 0.28	1.85 ± 0.79	0.94 ± 0.43	5.35 ± 2.71	1.11 ± 0.61	0.13 ± 0.04	0.98 ± 0.20	0.45 ± 0.29	1.12 ± 0.38	0.41 ± 0.13	1.20 ± 0.89	5.98 ± 2.24	1.84 ± 0.50	4.27 ± 0.87	3.58 ± 1.47	3.80 ± 0.91	25.46 ± 12.49	4.91 ± 2.45
leaves	6 h	low light	phyB	873.98 ± 281.60	13.71 ± 3.70	40.26 ± 13.67	2.29 ± 1.10	13.28 ± 3.94	0.03 ± 0.00	2.90 ± 1.15	1.90 ± 0.56	20.83 ± 6.31	0.37 ± 0.20	0.86 ± 0.30	1.84 ± 0.69	18.40 ± 10.09	1.74 ± 0.77	1.25 ± 0.19	0.04 ± 0.01	0.65 ± 0.22	0.41 ± 0.23	0.72 ± 0.31	0.41 ± 0.13	8.38 ± 1.92	7.17 ± 3.45	3.01 ± 1.38	3.84 ± 0.65	2.36 ± 0.36	3.98 ± 1.35	7.99 ± 7.12	3.54 ± 0.86
leaves	6 h	cold	WT	231.92 ± 185.54	48.83 ± 15.10	38.63 ± 14.62	8.02 ± 2.39	147.05 ± 119.63	1.21 ± 0.74	2.90 ± 0.12	0.51 ± 0.25	39.57 ± 21.50	0.47 ± 0.38	1.78 ± 0.85	3.51 ± 0.58	1.87 ± 0.88	4.38 ± 2.28	1.77 ± 0.48	1.33 ± 1.03	1.05 ± 0.63	20.62 ± 6.99	7.72 ± 2.75	83.15 ± 19.31	14.57 ± 4.14	7.24 ± 4.34	0.83 ± 0.36	12.51 ± 7.51	18.88 ± 4.87	8.45 ± 2.06	9.85 ± 6.76	19.66 ± 2.26
leaves	6 h	cold	cry1	973.37 ± 647.74	61.10 ± 16.77	37.96 ± 28.55	17.13 ± 9.27	102.05 ± 38.22	0.64 ± 0.23	2.63 ± 1.72	1.52 ± 0.80	68.08 ± 29.73	0.33 ± 0.11	0.50 ± 0.30	6.95 ± 2.72	1.88 ± 1.14	5.26 ± 4.23	0.97 ± 0.40	0.69 ± 0.50	0.89 ± 0.38	21.68 ± 7.12	16.54 ± 11.12	116.81 ± 73.19	16.07 ± 8.52	8.77 ± 3.79	1.65 ± 0.91	26.97 ± 21.54	13.20 ± 7.75	8.43 ± 5.39	75.59 ± 42.86	58.81 ± 18.08
leaves	6 h	cold	cry2	1 444.77 ± 982.24	79.77 ± 12.44	30.86 ± 13.73	11.76 ± 3.54	267.23 ± 57.45	1.44 ± 0.41	1.03 ± 0.60	0.29 ± 0.19	34.16 ± 10.30	0.34 ± 0.15	0.38 ± 0.08	3.50 ± 1.81	0.98 ± 0.49	4.35 ± 1.73	0.61 ± 0.19	1.15 ± 0.45	1.04 ± 0.34	31.48 ± 4.66	11.58 ± 2.12	361.84 ± 63.13	8.00 ± 0.36	6.99 ± 0.81	0.81 ± 0.39	18.93 ± 11.36	11.80 ± 7.05	6.77 ± 1.01	27.58 ± 1.91	19.36 ± 4.23
leaves	6 h	cold	phyA	893.75 ± 536.25	78.15 ± 11.63	41.12 ± 15.37	29.53 ± 11.10	157.50 ± 19.94	3.45 ± 1.38	0.80 ± 0.71	0.86 ± 0.14	25.65 ± 5.46	0.64 ± 0.29	0.61 ± 0.12	4.81 ± 2.89	0.56 ± 0.33	10.51 ± 0.65	1.36 ± 0.17	0.55 ± 0.06	1.31 ± 0.05	24.26 ± 5.31	10.80 ± 5.52	211.35 ± 78.97	16.88 ± 2.72	8.56 ± 4.64	0.22 ± 0.07	34.15 ± 13.66	14.03 ± 8.00	6.35 ± 1.12	20.79 ± 14.52	35.17 ± 15.75
leaves	6 h	cold	phyB	274.37 ± 219.49	66.85 ± 40.11	20.69 ± 9.32	5.61 ± 2.24	166.02 ± 128.78	2.07 ± 0.53	1.00 ± 0.33	0.76 ± 0.25	32.92 ± 16.86	0.38 ± 0.21	1.01 ± 0.74	5.30 ± 1.50	2.08 ± 0.49	3.82 ± 1.66	0.67 ± 0.09	0.70 ± 0.34	0.39 ± 0.12	30.48 ± 21.09	11.37 ± 6.18	134.29 ± 45.71	12.46 ± 0.24	3.83 ± 2.06	1.24 ± 0.93	8.24 ± 4.94	15.86 ± 3.89	2.38 ± 0.31	6.18 ± 0.81	5.34 ± 4.17
leaves	6 h	cold + low light	WT	473.17 ± 283.90	42.17 ± 28.10	78.97 ± 39.25	12.88 ± 7.73	65.61 ± 22.59	0.32 ± 0.20	1.44 ± 0.77	0.39 ± 0.25	39.71 ± 18.48	0.21 ± 0.18	0.61 ± 0.44	1.04 ± 0.62	1.14 ± 0.66	2.13 ± 1.71	0.77 ± 0.34	0.54 ± 0.33	0.70 ± 0.37	2.96 ± 1.86	7.08 ± 4.86	14.55 ± 6.67	5.57 ± 4.75	0.22 ± 0.02	0.12 ± 0.06	7.28 ± 3.84	5.89 ± 2.51	0.91 ± 0.39	15.62 ± 8.69	9.46 ± 4.57
leaves	6 h	cold + low light	cry1	499.71 ± 112.57	26.13 ± 3.89	113.46 ± 1.18	19.66 ± 7.86	50.11 ± 1.56	0.08 ± 0.01	0.74 ± 0.08	0.23 ± 0.04	21.82 ± 2.27	0.06 ± 0.01	0.70 ± 0.04	1.13 ± 0.18	0.39 ± 0.09	1.59 ± 0.18	0.32 ± 0.20	0.51 ± 0.07	1.51 ± 0.55	0.80 ± 0.02	4.72 ± 0.88	11.57 ± 3.05	7.49 ± 0.65	0.29 ± 0.07	0.05 ± 0.01	8.33 ± 3.33	5.01 ± 0.66	0.23 ± 0.13	13.32 ± 3.23	4.04 ± 0.99
leaves	6 h	cold + low light	cry2	1 318.77 ± 949.88	33.90 ± 17.16	53.51 ± 36.27	7.87 ± 1.81	38.31 ± 13.38	0.25 ± 0.04	0.95 ± 0.68	0.39 ± 0.31	28.25 ± 18.36	0.12 ± 0.07	0.28 ± 0.16	0.54 ± 0.10	0.63 ± 0.16	2.53 ± 1.66	0.31 ± 0.18	0.35 ± 0.12	0.97 ± 0.36	2.18 ± 1.12	4.97 ± 2.44	25.44 ± 12.81	6.35 ± 3.07	0.37 ± 0.23	0.06 ± 0.04	6.95 ± 3.33	5.80 ± 2.78	0.44 ± 0.36	19.07 ± 7.28	8.74 ± 2.85
leaves	6 h	cold + low light	phyA	1 070.70 ± 650.25	36.52 ± 16.25	36.60 ± 16.84	11.13 ± 3.75	28.80 ± 9.40	0.32 ± 0.12	0.67 ± 0.36	0.19 ± 0.11	41.62 ± 27.07	0.13 ± 0.09	0.34 ± 0.12	0.41 ± 0.23	0.33 ± 0.20	1.87 ± 1.12	0.22 ± 0.02	0.34 ± 0.12	0.89 ± 0.59	1.64 ± 1.18	8.12 ± 2.83	13.77 ± 6.21	10.09 ± 2.76	0.61 ± 0.25	0.05 ± 0.02	6.99 ± 2.11	5.03 ± 2.78	0.59 ± 0.13	11.82 ± 5.07	13.16 ± 3.49
leaves	6 h	cold + low light	phyB	265.02 ± 159.01	18.46 ± 9.18	30.09 ± 2.64	10.02 ± 4.07	38.64 ± 23.18	0.12 ± 0.02	0.40 ± 0.15	0.27 ± 0.15	14.43 ± 3.02	0.21 ± 0.07	0.23 ± 0.16	0.21 ± 0.04	0.71 ± 0.24	0.84 ± 0.17	0.20 ± 0.12	0.13 ± 0.04	0.05 ± 0.02	1.09 ± 0.40	2.24 ± 0.46	1.61 ± 1.16	7.91 ± 4.74	0.29 ± 0.14	0.03 ± 0.01	3.56 ± 2.14	2.46 ± 0.82	0.39 ± 0.19	4.24 ± 2.34	2.13 ± 1.09
leaves	7 d	control	WT	56.49 ± 14.17	3.79 ± 2.46	2.36 ± 1.76	0.29 ± 0.20	3.64 ± 1.72	0.18 ± 0.11	4.36 ± 3.02	1.28 ± 0.81	7.18 ± 3.27	0.47 ± 0.38	3.34 ± 1.44	1.43 ± 0.96	1.20 ± 0.67	6.51 ± 4.01	3.73 ± 2.36	0.99 ± 0.84	0.80 ± 0.34	0.30 ± 0.19	0.35 ± 0.21	3.53 ± 1.93	1.27 ± 0.86	109.79 ± 46.08	2.70 ± 1.41	2.57 ± 1.00	6.31 ± 2.86	5.74 ± 1.83	39.30 ± 18.83	11.83 ± 5.38
leaves	7 d	control	cry1	44.79 ± 7.92	3.79 ± 2.61	0.37 ± 0.29	0.19 ± 0.04	0.52 ± 0.24	0.38 ± 0.27	3.06 ± 1.71	1.16 ± 0.44	2.36 ± 0.89	0.51 ± 0.25	2.81 ± 0.86	0.58 ± 0.51	2.26 ± 1.08	4.29 ± 1.90	7.58 ± 3.89	0.64 ± 0.30	1.76 ± 0.87	0.47 ± 0.26	1.05 ± 0.69	2.16 ± 1.10	0.82 ± 0.40	55.09 ± 26.56	7.36 ± 2.59	3.99 ± 0.79	2.60 ± 1.32	3.09 ± 1.35	41.46 ± 20.96	4.81 ± 1.95
leaves	7 d	control	cry2	55.14 ± 6.31	1.75 ± 1.22	0.35 ± 0.21	0.48 ± 0.15	0.78 ± 0.29	0.29 ± 0.12	1.84 ± 0.89	0.72 ± 0.30	2.54 ± 1.10	0.42 ± 0.18	2.31 ± 0.50	0.58 ± 0.28	1.42 ± 0.51	3.81 ± 1.91	4.54 ± 1.78	0.54 ± 0.48	0.76 ± 0.43	0.55 ± 0.34	0.43 ± 0.34	2.81 ± 1.39	0.50 ± 0.17	43.72 ± 9.10	5.18 ± 1.26	2.76 ± 0.15	2.43 ± 0.74	1.71 ± 1.01	29.70 ± 15.57	3.43 ± 2.18
leaves	7 d	control	phyA	15.56 ± 10.57	1.21 ± 1.09	0.66 ± 0.40	0.38 ± 0.23	2.31 ± 1.01	0.52 ± 0.36	3.14 ± 2.13	0.92 ± 0.57	3.78 ± 2.14	0.27 ± 0.23	1.76 ± 0.46	0.24 ± 0.12	0.82 ± 0.40	6.59 ± 2.96	7.52 ± 3.54	0.58 ± 0.35	1.26 ± 0.64	0.33 ± 0.12	0.50 ± 0.34	1.36 ± 0.41	0.76 ± 0.42	19.34 ± 15.55	1.92 ± 1.56	1.78 ± 1.07	4.00 ± 1.38	3.68 ± 2.64	10.18 ± 6.08	2.27 ± 1.51
leaves	7 d	control	phyB	38.41 ± 6.53	5.14 ± 1.49	1.16 ± 0.70	0.54 ± 0.25	3.22 ± 2.30	0.79 ± 0.36	2.54 ± 1.42	0.77 ± 0.43	4.29 ± 2.19	0.34 ± 0.13	2.08 ± 0.70	0.69 ± 0.36	2.39 ± 1.17	4.51 ± 1.38	3.66 ± 2.98	0.33 ± 0.18	0.83 ± 0.46	0.64 ± 0.20	0.34 ± 0.21	2.09 ± 1.25	3.65 ± 1.44	62.69 ± 44.23	3.87 ± 2.27	1.69 ± 0.24	3.30 ± 1.35	3.88 ± 2.33	31.61 ± 11.62	3.34 ± 2.44
leaves	7 d	low light	WT	39.29 ± 17.74	2.06 ± 0.74	0.74 ± 0.34	0.26 ± 0.09	0.56 ± 0.39	0.12 ± 0.03	1.37 ± 0.98	1.82 ± 1.39	5.92 ± 4.75	0.13 ± 0.03	0.85 ± 0.31	0.87 ± 0.07	1.00 ± 0.47	6.46 ± 3.11	2.38 ± 0.94	0.23 ± 0.17	0.51 ± 0.19	0.22 ± 0.13	0.22 ± 0.17	1.61 ± 1.27	0.37 ± 0.10	2.75 ± 1.65	0.70 ± 0.34	1.10 ± 0.45	4.02 ± 1.83	0.92 ± 0.74	18.67 ± 11.65	1.07 ± 0.38
leaves	7 d	low light	cry1	163.35 ± 98.01	5.73 ± 1.38	2.29 ± 1.36	0.15 ± 0.08	0.59 ± 0.27	0.06 ± 0.01	1.84 ± 0.65	2.74 ± 0.79	7.84 ± 2.05	0.13 ± 0.05	0.95 ± 0.59	0.65 ± 0.31	2.87 ± 0.96	9.42 ± 2.12	8.43 ± 2.25	0.27 ± 0.05	0.55 ± 0.12	0.18 ± 0.06	0.19 ± 0.03	0.14 ± 0.08	0.31 ± 0.05	12.11 ± 2.74	2.26 ± 0.86	2.54 ± 1.71	2.37 ± 1.76	3.28 ± 1.26	12.24 ± 6.87	1.61 ± 0.60
leaves	7 d	low light	cry2	29.58 ± 10.78	2.19 ± 0.34	1.07 ± 0.84	0.16 ± 0.07	0.42 ± 0.29	0.10 ± 0.07	1.72 ± 1.27	3.05 ± 1.42	9.11 ± 7.45	0.18 ± 0.13	0.90 ± 0.56	1.61 ± 1.03	1.00 ± 0.79	9.71 ± 4.09	1.49 ± 0.77	0.28 ± 0.23	0.43 ± 0.28	0.28 ± 0.17	0.61 ± 0.49	0.84 ± 0.62	0.25 ± 0.11	5.93 ± 2.76	2.28 ± 1.51	3.03 ± 1.97	6.16 ± 3.40	2.45 ± 0.57	21.38 ± 15.52	1.81 ± 1.22
leaves	7 d	low light	phyA	61.05 ± 47.23	2.10 ± 1.19	1.92 ± 1.21	0.84 ± 0.31	0.36 ± 0.19	0.23 ± 0.19	1.63 ± 0.62	1.65 ± 0.64	5.59 ± 1.33	0.29 ± 0.05	0.90 ± 0.32	1.54 ± 0.97	1.62 ± 0.51	7.72 ± 0.86	7.77 ± 1.50	0.15 ± 0.06	0.60 ± 0.11	0.24 ± 0.21	0.16 ± 0.11	0.64 ± 0.34	0.71 ± 0.16	14.52 ± 4.59	1.85 ± 0.93	2.15 ± 0.82	4.92 ± 0.92	5.26 ± 2.41	23.29 ± 12.92	1.86 ± 0.93
leaves	7 d	low light	phyB	194.85 ± 141.60	5.45 ± 1.13	2.92 ± 2.01	0.49 ± 0.30	0.42 ± 0.04	0.24 ± 0.21	2.30 ± 0.90	1.75 ± 0.99	5.88 ± 1.52	0.26 ± 0.19	1.22 ± 0.45	0.40 ± 0.28	4.21 ± 2.32	3.73 ± 0.71	1.95 ± 1.27	0.13 ± 0.05	0.54 ± 0.12	0.26 ± 0.22	0.27 ± 0.19	0.24 ± 0.17	1.37 ± 0.57	5.65 ± 3.39	1.25 ± 0.35	2.33 ± 1.44	4.70 ± 2.12	3.04 ± 2.09	14.57 ± 10.58	1.09 ± 0.44
leaves	7 d	cold	WT	220.07 ± 48.18	3.67 ± 0.34	2.51 ± 0.57	0.82 ± 0.10	2.39 ± 0.99	0.37 ± 0.14	2.85 ± 0.68	0.35 ± 0.09	2.80 ± 0.35	0.82 ± 0.09	1.62 ± 0.62	1.53 ± 0.39	1.23 ± 0.45	15.12 ± 1.81	0.96 ± 0.19	1.51 ± 0.58	0.48 ± 0.11	9.13 ± 1.98	4.51 ± 1.57	0.28 ± 0.05	0.29 ± 0.12	29.20 ± 14.20	1.47 ± 0.50	1.43 ± 0.35	2.41 ± 0.54	8.37 ± 4.40	26.29 ± 5.81	14.87 ± 3.11
leaves	7 d	cold	cry1	296.72 ± 92.87	6.77 ± 2.39	15.89 ± 8.29	2.57 ± 1.08	5.09 ± 1.71	0.33 ± 0.08	6.23 ± 0.95	0.70 ± 0.33	10.54 ± 6.00	2.93 ± 0.88	0.65 ± 0.20	41.09 ± 16.16	6.06 ± 3.52	16.54 ± 2.77	4.14 ± 1.58	0.81 ± 0.33	1.10 ± 0.45	30.52 ± 13.57	10.97 ± 3.70	4.50 ± 1.64	0.40 ± 0.21	15.66 ± 6.81	3.40 ± 1.37	20.59 ± 8.86	5.65 ± 2.38	8.28 ± 2.12	32.70 ± 15.81	12.34 ± 3.14
leaves	7 d	cold	cry2	267.40 ± 205.33	4.86 ± 1.78	15.96 ± 5.16	2.37 ± 0.94	7.50 ± 1.95	0.37 ± 0.15	3.46 ± 1.12	0.50 ± 0.27	19.45 ± 9.71	1.39 ± 0.61	0.67 ± 0.26	13.93 ± 7.51	4.25 ± 2.23	9.26 ± 2.75	1.85 ± 0.84	0.59 ± 0.15	0.96 ± 0.30	14.96 ± 6.42	5.37 ± 1.79	2.79 ± 0.98	0.37 ± 0.16	9.74 ± 4.68	1.75 ± 0.69	11.39 ± 3.94	3.20 ± 1.04	2.14 ± 1.35	23.99 ± 10.00	7.57 ± 3.42
leaves	7 d	cold	phyA	193.40 ± 120.23	4.51 ± 1.07	7.28 ± 2.91	1.88 ± 0.60	1.97 ± 0.53	0.12 ± 0.04	1.65 ± 0.58	0.25 ± 0.03	7.11 ± 2.84	1.39 ± 0.44	0.58 ± 0.19	5.31 ± 2.14	2.02 ± 0.58	13.63 ± 7.07	2.76 ± 0.75	0.76 ± 0.15	0.80 ± 0.07	5.05 ± 2.03	1.86 ± 0.90	0.74 ± 0.09	0.17 ± 0.06	2.90 ± 1.74	0.71 ± 0.28	1.33 ± 0.57	3.72 ± 0.75	1.35 ± 0.75	11.35 ± 3.60	2.82 ± 1.26
leaves	7 d	cold	phyB	105.42 ± 65.05	2.25 ± 1.23	22.64 ± 12.29	3.05 ± 2.12	3.55 ± 2.35	0.04 ± 0.02	3.33 ± 1.31	0.42 ± 0.07	9.00 ± 1.64	0.85 ± 0.29	0.11 ± 0.02	8.28 ± 6.72	2.55 ± 1.51	4.43 ± 1.38	0.27 ± 0.05	0.10 ± 0.02	0.63 ± 0.18	7.32 ± 4.12	2.35 ± 0.85	0.35 ± 0.22	0.56 ± 0.16	4.26 ± 2.29	1.41 ± 0.43	5.99 ± 4.32	1.38 ± 0.56	0.85 ± 0.31	11.80 ± 5.18	2.47 ± 1.70
leaves	7 d	cold + low light	WT	135.29 ± 110.85	9.37 ± 3.16	15.33 ± 5.53	7.06 ± 2.17	5.87 ± 3.13	0.24 ± 0.14	6.30 ± 2.83	1.19 ± 0.76	36.26 ± 27.13	0.76 ± 0.09	3.92 ± 1.89	1.13 ± 0.33	1.48 ± 1.01	18.03 ± 3.24	0.96 ± 0.69	3.24 ± 1.44	0.70 ± 0.22	1.59 ± 0.54	1.92 ± 1.21	0.37 ± 0.27	0.63 ± 0.45	0.73 ± 0.39	4.92 ± 3.72	4.25 ± 0.83	2.66 ± 1.36	3.71 ± 1.75	36.96 ± 4.34	3.33 ± 1.97
leaves	7 d	cold + low light	cry1	749.59 ± 157.99	24.87 ± 4.26	51.54 ± 11.73	14.21 ± 1.37	10.14 ± 1.94	0.20 ± 0.05	5.66 ± 1.67	2.67 ± 0.75	45.60 ± 8.43	0.92 ± 0.17	2.06 ± 0.41	4.82 ± 1.16	1.41 ± 0.27	24.52 ± 3.92	0.57 ± 0.47	4.66 ± 0.73	1.34 ± 0.13	1.95 ± 0.08	2.24 ± 0.66	0.46 ± 0.24	4.84 ± 1.36	2.12 ± 0.57	2.86 ± 0.82	1.96 ± 0.95	9.36 ± 1.90	3.45 ± 1.59	50.40 ± 6.99	6.63 ± 2.11
leaves	7 d	cold + low light	cry2	542.31 ± 222.44	14.11 ± 5.65	15.47 ± 9.03	3.87 ± 1.74	5.58 ± 1.47	0.33 ± 0.09	5.11 ± 0.83	2.18 ± 0.37	29.37 ± 11.48	1.02 ± 0.16	1.05 ± 0.26	2.08 ± 1.28	2.29 ± 0.66	21.91 ± 2.60	0.89 ± 0.46	2.58 ± 1.11	1.36 ± 0.39	2.15 ± 0.47	1.59 ± 0.49	0.24 ± 0.14	1.46 ± 1.07	1.52 ± 0.81	1.83 ± 0.93	1.32 ± 0.25	7.96 ± 1.16	1.49 ± 0.82	48.88 ± 15.72	4.21 ± 1.30
leaves	7 d	cold + low light	phyA	601.35 ± 302.89	13.21 ± 3.22	16.64 ± 8.62	7.04 ± 3.26	3.49 ± 0.87	0.21 ± 0.06	9.28 ± 1.77	2.39 ± 0.61	29.19 ± 6.86	1.28 ± 0.54	0.98 ± 0.27	2.72 ± 0.97	1.81 ± 1.04	25.03 ± 5.43	1.69 ± 1.05	3.40 ± 0.59	1.33 ± 0.47	2.19 ± 1.65	3.18 ± 1.96	0.42 ± 0.14	0.87 ± 0.41	2.91 ± 0.64	4.60 ± 1.73	2.21 ± 1.31	9.63 ± 2.85	3.16 ± 2.23	58.66 ± 30.72	5.71 ± 3.43
leaves	7 d	cold + low light	phyB	1 076.28 ± 593.62	29.00 ± 9.25	93.96 ± 10.58	18.23 ± 1.64	10.47 ± 5.37	0.09 ± 0.03	8.55 ± 2.12	2.76 ± 0.85	49.24 ± 7.76	0.50 ± 0.06	0.83 ± 0.19	3.83 ± 2.77	1.88 ± 1.16	15.52 ± 2.83	0.58 ± 0.39	3.43 ± 0.54	1.00 ± 0.28	2.06 ± 0.27	1.86 ± 0.52	0.08 ± 0.01	2.43 ± 1.51	3.17 ± 2.21	3.53 ± 1.56	3.45 ± 1.16	7.27 ± 1.21	2.77 ± 1.01	46.41 ± 8.57	3.88 ± 1.24
roots	30 min	control	WT	1.00 ± 0.60	1.00 ± 0.60	1.00 ± 0.52	1.00 ± 0.58	1.00 ± 0.34	1.00 ± 0.72	1.00 ± 0.48	1.00 ± 0.17	1.00 ± 0.73	1.00 ± 0.43	1.00 ± 0.18	1.00 ± 0.15	1.00 ± 0.60	1.00 ± 0.46	1.00 ± 0.60	1.00 ± 0.62	1.00 ± 0.35	1.00 ± 0.14	1.00 ± 0.37	1.00 ± 0.60	1.00 ± 0.60	1.00 ± 0.60	1.00 ± 0.31	1.00 ± 0.60	1.00 ± 0.30	1.00 ± 0.60	1.00 ± 0.32	1.00 ± 0.60
roots	30 min	control	cry1	1.28 ± 0.14	1.73 ± 0.44	0.20 ± 0.10	0.08 ± 0.03	0.79 ± 0.32	0.29 ± 0.16	0.95 ± 0.56	0.17 ± 0.11	1.22 ± 0.62	2.09 ± 0.58	0.67 ± 0.26	0.57 ± 0.20	1.03 ± 0.48	0.70 ± 0.23	0.35 ± 0.08	0.52 ± 0.20	0.27 ± 0.16	0.38 ± 0.10	1.18 ± 0.34	1.33 ± 1.09	0.18 ± 0.06	0.99 ± 0.73	0.26 ± 0.14	1.03 ± 0.17	0.84 ± 0.54	1.03 ± 0.56	0.31 ± 0.20	1.38 ± 0.70
roots	30 min	control	cry2	0.22 ± 0.13	1.66 ± 0.77	0.30 ± 0.12	0.17 ± 0.13	0.25 ± 0.07	1.32 ± 0.66	0.07 ± 0.05	0.31 ± 0.10	0.92 ± 0.27	1.77 ± 0.89	0.62 ± 0.16	0.54 ± 0.19	1.46 ± 0.80	1.23 ± 0.66	0.43 ± 0.08	0.76 ± 0.11	1.06 ± 0.61	0.32 ± 0.06	0.58 ± 0.17	0.98 ± 0.59	0.20 ± 0.10	0.39 ± 0.23	0.23 ± 0.15	0.76 ± 0.46	0.85 ± 0.32	0.41 ± 0.06	0.28 ± 0.08	1.77 ± 0.31
roots	30 min	control	phyA	1.02 ± 0.59	2.68 ± 1.28	0.81 ± 0.64	0.23 ± 0.14	0.12 ± 0.03	0.47 ± 0.33	0.89 ± 0.54	0.57 ± 0.16	1.38 ± 0.48	1.50 ± 0.43	0.64 ± 0.41	1.21 ± 0.72	1.32 ± 0.79	1.77 ± 1.04	0.37 ± 0.30	1.46 ± 0.95	0.88 ± 0.56	1.87 ± 1.13	1.17 ± 0.65	0.42 ± 0.16	1.29 ± 0.55	0.91 ± 0.54	0.36 ± 0.26	1.80 ± 0.33	2.81 ± 0.72	0.57 ± 0.39	3.53 ± 1.81	0.86 ± 0.35
roots	30 min	control	phyB	0.47 ± 0.31	1.87 ± 0.96	0.83 ± 0.72	0.49 ± 0.29	1.46 ± 0.51	1.59 ± 0.96	0.37 ± 0.26	0.62 ± 0.23	0.46 ± 0.34	1.64 ± 0.60	0.57 ± 0.15	1.88 ± 0.93	1.27 ± 0.52	1.50 ± 1.01	0.55 ± 0.12	0.77 ± 0.18	1.51 ± 0.75	1.51 ± 0.53	0.69 ± 0.24	0.46 ± 0.25	0.42 ± 0.24	1.24 ± 0.88	0.30 ± 0.12	1.37 ± 0.39	1.29 ± 0.57	0.89 ± 0.34	1.92 ± 1.01	1.35 ± 0.52
roots	30 min	low light	WT	1.81 ± 0.98	2.73 ± 0.95	2.60 ± 1.64	0.25 ± 0.14	0.38 ± 0.19	5.22 ± 1.77	0.33 ± 0.13	0.94 ± 0.71	0.96 ± 0.49	1.50 ± 1.13	0.26 ± 0.06	1.44 ± 1.17	0.48 ± 0.24	3.66 ± 0.93	0.71 ± 0.42	0.39 ± 0.17	0.75 ± 0.09	1.37 ± 1.02	1.39 ± 0.47	1.82 ± 0.85	0.54 ± 0.43	5.14 ± 1.34	1.53 ± 0.19	6.63 ± 1.22	3.87 ± 2.36	6.18 ± 3.44	2.43 ± 0.20	0.57 ± 0.30
roots	30 min	low light	cry1	2.65 ± 1.61	3.13 ± 0.38	3.59 ± 1.10	0.86 ± 0.29	0.38 ± 0.10	7.45 ± 1.97	0.64 ± 0.06	0.26 ± 0.08	2.31 ± 0.48	1.13 ± 0.48	1.65 ± 0.52	7.59 ± 2.58	3.45 ± 0.95	6.67 ± 0.81	1.54 ± 0.71	1.26 ± 0.53	1.39 ± 0.60	2.05 ± 0.88	1.52 ± 0.23	1.38 ± 0.44	0.73 ± 0.23	5.09 ± 1.96	1.77 ± 0.38	12.37 ± 4.43	5.29 ± 2.01	7.45 ± 4.33	3.29 ± 0.45	0.53 ± 0.27
roots	30 min	low light	cry2	1.21 ± 0.56	1.34 ± 0.07	2.52 ± 0.61	0.55 ± 0.26	0.14 ± 0.06	4.32 ± 0.76	0.62 ± 0.14	0.34 ± 0.20	1.45 ± 0.53	0.83 ± 0.46	0.52 ± 0.44	3.69 ± 1.05	0.95 ± 0.48	3.40 ± 1.46	1.77 ± 0.51	0.49 ± 0.24	0.82 ± 0.36	1.21 ± 0.47	0.85 ± 0.10	1.13 ± 0.41	0.19 ± 0.15	3.35 ± 1.88	0.91 ± 0.17	6.08 ± 1.86	2.81 ± 1.07	3.61 ± 2.70	1.31 ± 0.09	0.43 ± 0.22
roots	30 min	low light	phyA	1.19 ± 0.46	1.58 ± 0.58	0.86 ± 0.22	0.20 ± 0.05	0.01 ± 0.01	0.37 ± 0.13	0.25 ± 0.08	0.07 ± 0.06	0.90 ± 0.47	0.60 ± 0.29	1.07 ± 0.57	2.24 ± 0.51	1.23 ± 0.38	2.11 ± 0.68	1.27 ± 0.39	0.56 ± 0.19	0.63 ± 0.28	0.72 ± 0.30	0.47 ± 0.16	0.11 ± 0.02	0.71 ± 0.23	1.52 ± 0.68	0.61 ± 0.23	3.74 ± 1.91	1.96 ± 0.63	1.36 ± 0.80	1.28 ± 0.62	0.11 ± 0.06
roots	30 min	low light	phyB	3.83 ± 1.89	6.02 ± 0.08	2.35 ± 1.41	0.74 ± 0.20	0.38 ± 0.07	9.51 ± 1.47	0.34 ± 0.20	0.57 ± 0.46	3.28 ± 0.77	1.77 ± 1.43	1.12 ± 0.34	9.51 ± 0.68	0.75 ± 0.62	5.84 ± 0.70	0.88 ± 0.36	0.86 ± 0.25	0.81 ± 0.36	0.63 ± 0.38	1.76 ± 0.15	2.46 ± 1.48	0.67 ± 0.45	4.32 ± 0.30	2.01 ± 0.66	9.18 ± 1.34	7.63 ± 3.51	8.76 ± 1.85	2.77 ± 0.52	0.58 ± 0.35
roots	30 min	cold	WT	1.05 ± 0.63	4.23 ± 1.75	65.04 ± 30.22	14.39 ± 4.35	23.05 ± 5.68	0.91 ± 0.55	0.52 ± 0.02	0.79 ± 0.19	2.52 ± 0.97	1.40 ± 0.34	0.47 ± 0.37	1.62 ± 0.57	3.02 ± 0.38	2.56 ± 1.41	0.39 ± 0.18	0.92 ± 0.68	3.47 ± 1.62	1.51 ± 0.32	2.26 ± 0.17	0.59 ± 0.35	0.59 ± 0.26	1.37 ± 0.48	0.51 ± 0.04	1.58 ± 0.95	1.15 ± 0.70	0.74 ± 0.20	1.35 ± 0.82	0.25 ± 0.07
roots	30 min	cold	cry1	0.52 ± 0.13	3.36 ± 0.17	135.79 ± 64.55	52.49 ± 17.18	64.18 ± 18.14	0.83 ± 0.03	0.48 ± 0.10	0.11 ± 0.05	2.60 ± 1.90	0.74 ± 0.44	0.56 ± 0.28	1.29 ± 0.86	1.75 ± 0.37	1.57 ± 0.01	0.84 ± 0.01	1.77 ± 0.78	1.20 ± 0.44	0.87 ± 0.54	0.73 ± 0.33	0.33 ± 0.20	1.88 ± 0.44	0.82 ± 0.49	0.23 ± 0.14	2.02 ± 0.80	1.13 ± 0.24	0.25 ± 0.12	2.30 ± 0.08	0.04 ± 0.02
roots	30 min	cold	cry2	0.59 ± 0.43	9.49 ± 2.52	188.71 ± 40.39	118.33 ± 33.20	186.11 ± 76.28	2.51 ± 1.16	0.63 ± 0.36	0.25 ± 0.15	0.52 ± 0.30	1.18 ± 0.57	0.99 ± 0.31	0.31 ± 0.04	2.87 ± 0.84	4.22 ± 0.52	2.88 ± 0.95	6.02 ± 4.06	2.23 ± 0.44	2.36 ± 1.38	1.65 ± 0.68	1.24 ± 0.63	5.91 ± 1.04	0.40 ± 0.11	0.09 ± 0.03	4.21 ± 2.50	2.72 ± 1.83	0.14 ± 0.04	0.53 ± 0.26	0.18 ± 0.11
roots	30 min	cold	phyA	0.06 ± 0.04	4.76 ± 1.19	91.13 ± 53.90	19.00 ± 10.03	6.04 ± 4.40	0.52 ± 0.18	0.30 ± 0.18	0.36 ± 0.24	0.97 ± 0.69	0.96 ± 0.39	0.40 ± 0.24	0.52 ± 0.28	1.19 ± 0.42	3.64 ± 1.64	1.13 ± 0.44	1.19 ± 0.97	1.50 ± 0.58	1.55 ± 0.49	1.28 ± 0.48	0.55 ± 0.22	1.63 ± 0.85	0.19 ± 0.00	0.08 ± 0.03	2.48 ± 1.69	1.71 ± 0.58	0.59 ± 0.36	2.10 ± 0.73	0.16 ± 0.07
roots	30 min	cold	phyB	0.15 ± 0.03	1.37 ± 0.65	90.03 ± 45.14	34.19 ± 22.28	23.07 ± 5.82	0.20 ± 0.17	0.32 ± 0.16	0.20 ± 0.10	1.32 ± 0.92	0.83 ± 0.38	0.23 ± 0.11	0.55 ± 0.37	0.69 ± 0.44	0.44 ± 0.26	0.59 ± 0.29	0.59 ± 0.33	0.93 ± 0.30	1.54 ± 0.45	0.65 ± 0.36	0.19 ± 0.11	0.56 ± 0.42	0.34 ± 0.10	0.14 ± 0.11	1.19 ± 0.30	0.45 ± 0.34	0.19 ± 0.03	1.15 ± 0.12	0.16 ± 0.10
roots	30 min	cold + low light	WT	2.52 ± 0.46	5.79 ± 2.36	41.14 ± 17.91	22.91 ± 12.11	15.46 ± 7.76	2.13 ± 0.60	0.71 ± 0.38	0.46 ± 0.21	12.43 ± 4.58	1.10 ± 0.43	3.35 ± 0.59	3.71 ± 0.93	1.73 ± 0.50	2.94 ± 1.23	0.39 ± 0.07	1.60 ± 1.02	1.84 ± 0.36	0.78 ± 0.41	1.07 ± 0.58	0.91 ± 0.06	2.39 ± 1.22	9.06 ± 3.80	1.87 ± 1.14	5.31 ± 3.03	2.05 ± 0.69	1.76 ± 0.53	2.50 ± 0.31	0.63 ± 0.41
roots	30 min	cold + low light	cry1	1.42 ± 0.54	3.21 ± 0.18	28.31 ± 1.59	19.70 ± 6.13	11.85 ± 3.21	0.55 ± 0.26	0.57 ± 0.06	1.24 ± 0.74	12.79 ± 0.80	0.43 ± 0.06	0.21 ± 0.10	1.61 ± 0.49	0.92 ± 0.69	1.08 ± 0.36	1.17 ± 0.70	0.86 ± 0.15	0.70 ± 0.19	0.41 ± 0.11	0.39 ± 0.10	0.54 ± 0.32	0.66 ± 0.38	1.33 ± 0.92	0.25 ± 0.06	1.26 ± 0.76	1.59 ± 0.20	0.34 ± 0.05	0.83 ± 0.18	0.72 ± 0.27
roots	30 min	cold + low light	cry2	6.97 ± 1.69	3.43 ± 2.04	31.56 ± 6.92	10.70 ± 2.37	11.08 ± 3.32	0.75 ± 0.08	0.64 ± 0.26	0.76 ± 0.58	15.35 ± 5.82	0.26 ± 0.04	0.77 ± 0.31	3.14 ± 0.48	3.16 ± 1.00	4.96 ± 0.87	1.65 ± 0.57	2.37 ± 0.45	1.36 ± 0.57	1.03 ± 0.27	1.31 ± 0.36	0.34 ± 0.28	1.35 ± 0.06	8.09 ± 3.74	1.48 ± 0.33	2.74 ± 0.18	1.56 ± 0.53	2.29 ± 1.52	3.18 ± 0.57	1.17 ± 0.48
roots	30 min	cold + low light	phyA	5.50 ± 2.69	1.36 ± 0.31	51.15 ± 39.84	31.20 ± 18.72	9.11 ± 3.72	0.41 ± 0.06	0.41 ± 0.25	1.62 ± 1.36	5.48 ± 4.42	0.41 ± 0.05	0.43 ± 0.26	1.16 ± 0.62	1.69 ± 0.47	3.68 ± 0.12	0.23 ± 0.07	0.74 ± 0.55	0.79 ± 0.60	0.48 ± 0.22	1.11 ± 0.63	0.55 ± 0.33	0.80 ± 0.31	2.95 ± 1.72	0.68 ± 0.14	4.01 ± 1.84	2.29 ± 1.45	1.45 ± 0.39	1.33 ± 0.20	1.06 ± 0.31
roots	30 min	cold + low light	phyB	1.79 ± 0.14	2.70 ± 0.38	42.13 ± 5.82	25.16 ± 6.86	19.25 ± 4.16	0.61 ± 0.20	0.45 ± 0.21	1.90 ± 0.88	3.94 ± 2.03	0.43 ± 0.13	0.07 ± 0.03	1.00 ± 0.25	1.45 ± 0.64	1.55 ± 0.16	0.60 ± 0.22	1.65 ± 0.79	0.80 ± 0.11	0.64 ± 0.18	0.57 ± 0.09	0.13 ± 0.08	0.50 ± 0.15	1.41 ± 0.36	0.30 ± 0.07	1.07 ± 0.61	2.07 ± 0.49	0.39 ± 0.05	0.98 ± 0.18	0.48 ± 0.19
roots	6 h	control	WT	0.40 ± 0.21	4.11 ± 1.51	0.89 ± 0.35	0.06 ± 0.01	0.31 ± 0.14	0.30 ± 0.15	0.26 ± 0.16	0.09 ± 0.05	1.13 ± 0.28	0.84 ± 0.43	0.67 ± 0.12	0.73 ± 0.34	0.53 ± 0.21	0.39 ± 0.11	0.38 ± 0.23	1.28 ± 0.90	1.53 ± 0.52	0.70 ± 0.39	0.98 ± 0.56	0.67 ± 0.10	0.18 ± 0.10	0.19 ± 0.07	0.47 ± 0.27	1.36 ± 0.84	0.30 ± 0.18	1.30 ± 0.61	1.12 ± 0.38	0.42 ± 0.13
roots	6 h	control	cry1	0.15 ± 0.07	2.86 ± 1.26	0.58 ± 0.11	0.05 ± 0.02	0.17 ± 0.06	0.28 ± 0.14	0.13 ± 0.07	0.16 ± 0.09	0.98 ± 0.55	0.44 ± 0.13	0.31 ± 0.26	1.48 ± 0.93	1.01 ± 0.40	0.76 ± 0.33	0.34 ± 0.23	0.58 ± 0.31	1.65 ± 1.04	1.09 ± 0.45	1.08 ± 0.59	0.77 ± 0.46	0.17 ± 0.08	0.94 ± 0.52	0.31 ± 0.20	0.67 ± 0.21	0.31 ± 0.15	0.32 ± 0.09	1.54 ± 0.87	0.20 ± 0.12
roots	6 h	control	cry2	0.17 ± 0.10	1.56 ± 0.75	0.45 ± 0.33	0.04 ± 0.03	0.09 ± 0.04	0.37 ± 0.21	0.47 ± 0.35	0.13 ± 0.09	1.86 ± 0.44	1.28 ± 0.60	0.30 ± 0.22	1.41 ± 0.59	0.71 ± 0.37	0.94 ± 0.57	0.41 ± 0.22	1.04 ± 0.49	1.06 ± 0.79	1.25 ± 0.75	0.87 ± 0.52	0.64 ± 0.37	0.23 ± 0.11	0.89 ± 0.18	0.41 ± 0.08	0.98 ± 0.26	0.34 ± 0.27	1.23 ± 0.61	1.64 ± 1.06	0.49 ± 0.25
roots	6 h	control	phyA	0.18 ± 0.08	2.53 ± 1.33	0.58 ± 0.30	0.07 ± 0.02	0.04 ± 0.02	0.10 ± 0.05	0.24 ± 0.10	0.16 ± 0.14	0.51 ± 0.19	0.53 ± 0.41	0.47 ± 0.17	0.71 ± 0.51	0.66 ± 0.31	0.76 ± 0.18	0.26 ± 0.11	0.70 ± 0.39	0.50 ± 0.31	0.68 ± 0.50	0.37 ± 0.23	0.80 ± 0.16	0.07 ± 0.03	1.21 ± 0.68	0.33 ± 0.02	0.92 ± 0.66	0.14 ± 0.05	0.22 ± 0.17	0.51 ± 0.33	0.14 ± 0.09
roots	6 h	control	phyB	0.18 ± 0.00	1.63 ± 0.97	0.50 ± 0.41	0.08 ± 0.06	0.24 ± 0.07	0.25 ± 0.14	0.08 ± 0.03	0.16 ± 0.12	0.34 ± 0.25	0.81 ± 0.31	0.55 ± 0.29	0.53 ± 0.44	0.94 ± 0.42	0.49 ± 0.25	0.66 ± 0.19	1.34 ± 0.80	1.72 ± 0.14	0.21 ± 0.08	0.12 ± 0.06	0.60 ± 0.27	0.19 ± 0.07	0.36 ± 0.03	0.18 ± 0.08	1.19 ± 0.31	0.21 ± 0.13	0.31 ± 0.06	0.53 ± 0.32	0.42 ± 0.31
roots	6 h	low light	WT	3.01 ± 1.18	2.76 ± 0.44	2.59 ± 1.04	0.20 ± 0.08	0.24 ± 0.12	4.01 ± 1.53	0.39 ± 0.06	0.97 ± 0.60	2.03 ± 0.18	1.00 ± 0.38	1.17 ± 0.57	2.60 ± 1.10	1.81 ± 0.92	2.93 ± 0.81	0.48 ± 0.06	0.40 ± 0.15	1.27 ± 0.44	0.73 ± 0.13	1.04 ± 0.25	2.16 ± 1.37	0.17 ± 0.05	2.87 ± 0.89	1.34 ± 0.24	5.93 ± 0.55	1.75 ± 0.52	3.97 ± 1.06	2.36 ± 0.24	0.49 ± 0.06
roots	6 h	low light	cry1	1.91 ± 0.07	2.20 ± 0.14	2.25 ± 0.62	0.14 ± 0.04	0.11 ± 0.05	2.62 ± 0.23	0.55 ± 0.06	0.29 ± 0.02	4.21 ± 0.15	1.13 ± 0.14	2.30 ± 0.95	4.25 ± 0.22	1.88 ± 0.27	2.96 ± 0.38	0.76 ± 0.14	1.03 ± 0.06	1.55 ± 0.23	1.34 ± 0.18	0.96 ± 0.10	0.29 ± 0.05	0.16 ± 0.01	3.48 ± 0.13	2.31 ± 0.87	11.41 ± 1.54	1.29 ± 0.04	4.65 ± 0.29	3.12 ± 0.29	0.31 ± 0.03
roots	6 h	low light	cry2	1.03 ± 0.13	1.99 ± 0.12	1.41 ± 0.20	0.14 ± 0.02	0.24 ± 0.14	2.81 ± 0.53	0.57 ± 0.01	0.35 ± 0.01	3.53 ± 0.58	1.16 ± 0.01	1.96 ± 1.16	2.39 ± 0.31	1.42 ± 0.17	1.69 ± 0.45	0.35 ± 0.28	0.62 ± 0.47	0.94 ± 0.04	1.09 ± 0.07	1.18 ± 0.08	0.67 ± 0.40	0.11 ± 0.00	2.80 ± 0.93	1.84 ± 1.04	5.18 ± 3.71	2.10 ± 0.04	3.49 ± 0.74	2.47 ± 0.62	0.40 ± 0.08
roots	6 h	low light	phyA	2.14 ± 0.17	3.31 ± 0.64	1.96 ± 0.87	0.14 ± 0.05	0.26 ± 0.09	1.53 ± 0.08	0.78 ± 0.33	0.83 ± 0.47	2.27 ± 0.26	0.40 ± 0.07	2.96 ± 0.98	2.41 ± 0.66	2.80 ± 0.53	5.50 ± 1.57	0.46 ± 0.25	0.32 ± 0.01	1.11 ± 0.36	0.76 ± 0.09	0.64 ± 0.18	0.23 ± 0.14	0.19 ± 0.07	4.22 ± 1.60	2.36 ± 0.99	13.98 ± 7.85	3.81 ± 0.58	6.70 ± 1.67	2.90 ± 1.91	0.39 ± 0.10
roots	6 h	low light	phyB	2.08 ± 0.27	2.61 ± 1.77	0.48 ± 0.29	0.08 ± 0.04	0.16 ± 0.05	3.29 ± 0.63	0.39 ± 0.01	0.47 ± 0.05	2.07 ± 0.28	0.45 ± 0.31	0.61 ± 0.15	3.73 ± 1.41	0.44 ± 0.28	1.09 ± 0.11	0.14 ± 0.02	0.18 ± 0.04	1.01 ± 0.08	1.02 ± 0.17	0.36 ± 0.27	0.06 ± 0.04	0.23 ± 0.03	3.81 ± 3.06	3.07 ± 2.59	4.56 ± 1.04	0.60 ± 0.10	1.61 ± 0.42	1.91 ± 0.04	0.24 ± 0.02
roots	6 h	cold	WT	8.00 ± 4.80	5.27 ± 1.97	18.00 ± 6.80	13.96 ± 4.02	151.52 ± 76.97	2.45 ± 1.83	0.34 ± 0.15	0.18 ± 0.03	4.94 ± 1.56	0.46 ± 0.14	0.38 ± 0.02	0.62 ± 0.09	1.99 ± 1.10	0.60 ± 0.34	0.41 ± 0.22	1.17 ± 0.02	2.87 ± 0.53	1.28 ± 0.14	0.84 ± 0.22	20.39 ± 3.26	0.43 ± 0.05	0.23 ± 0.14	0.21 ± 0.12	1.65 ± 0.99	1.82 ± 0.58	0.21 ± 0.03	0.93 ± 0.59	0.21 ± 0.16
roots	6 h	cold	cry1	18.15 ± 1.79	9.96 ± 3.11	24.31 ± 3.43	7.75 ± 2.55	156.14 ± 43.45	3.77 ± 1.63	0.25 ± 0.04	0.13 ± 0.01	6.08 ± 1.94	0.16 ± 0.05	0.27 ± 0.11	0.95 ± 0.12	1.80 ± 0.97	1.10 ± 0.17	0.34 ± 0.05	0.64 ± 0.07	3.44 ± 0.37	1.91 ± 0.54	1.20 ± 0.15	10.05 ± 1.66	0.38 ± 0.31	0.41 ± 0.28	0.13 ± 0.07	1.14 ± 0.51	3.05 ± 0.81	0.08 ± 0.02	2.35 ± 0.72	0.13 ± 0.06
roots	6 h	cold	cry2	8.64 ± 5.26	10.85 ± 4.59	19.53 ± 9.88	9.10 ± 4.12	156.94 ± 57.14	6.89 ± 4.00	0.52 ± 0.18	0.17 ± 0.12	5.60 ± 2.34	0.17 ± 0.12	0.39 ± 0.23	0.71 ± 0.48	2.54 ± 1.23	1.76 ± 1.10	0.33 ± 0.17	1.23 ± 0.58	2.77 ± 0.65	1.96 ± 0.96	1.29 ± 0.57	11.63 ± 3.67	0.37 ± 0.10	0.34 ± 0.16	0.12 ± 0.09	1.16 ± 0.62	3.38 ± 1.37	0.08 ± 0.06	1.75 ± 1.28	0.14 ± 0.06
roots	6 h	cold	phyA	1.71 ± 1.02	13.09 ± 7.85	18.65 ± 11.19	29.98 ± 17.99	89.66 ± 53.80	0.90 ± 0.54	0.27 ± 0.16	0.06 ± 0.04	1.35 ± 0.81	0.48 ± 0.29	0.86 ± 0.51	0.17 ± 0.10	4.01 ± 2.41	0.64 ± 0.39	0.20 ± 0.12	1.16 ± 0.69	1.36 ± 0.82	0.79 ± 0.47	0.67 ± 0.40	2.41 ± 1.45	0.30 ± 0.18	0.25 ± 0.15	0.11 ± 0.07	1.78 ± 1.07	2.43 ± 1.46	0.07 ± 0.04	0.76 ± 0.46	0.22 ± 0.13
roots	6 h	cold	phyB	3.54 ± 1.63	6.16 ± 1.02	8.00 ± 3.22	14.19 ± 8.51	71.44 ± 20.33	0.87 ± 0.19	0.10 ± 0.05	0.39 ± 0.17	2.74 ± 0.94	0.33 ± 0.09	0.32 ± 0.06	0.26 ± 0.18	1.10 ± 0.58	0.41 ± 0.17	0.17 ± 0.08	0.42 ± 0.08	1.50 ± 0.48	1.59 ± 0.65	0.50 ± 0.20	2.00 ± 1.52	0.12 ± 0.03	0.23 ± 0.12	0.16 ± 0.10	1.18 ± 0.71	0.87 ± 0.61	0.11 ± 0.10	0.44 ± 0.15	0.13 ± 0.05
roots	6 h	cold + low light	WT	13.76 ± 0.76	5.16 ± 1.91	4.71 ± 0.81	5.49 ± 1.49	40.00 ± 13.07	2.38 ± 0.77	0.12 ± 0.01	0.02 ± 0.01	3.65 ± 1.09	0.32 ± 0.16	0.19 ± 0.13	1.30 ± 0.65	1.10 ± 0.28	0.80 ± 0.15	0.05 ± 0.03	0.69 ± 0.18	0.70 ± 0.39	0.93 ± 0.32	0.62 ± 0.20	3.58 ± 1.12	0.27 ± 0.10	0.05 ± 0.00	0.12 ± 0.06	0.91 ± 0.10	1.62 ± 0.57	0.43 ± 0.14	1.93 ± 0.55	0.19 ± 0.16
roots	6 h	cold + low light	cry1	32.41 ± 3.09	4.78 ± 1.25	13.67 ± 3.49	13.85 ± 4.51	89.37 ± 26.64	1.68 ± 0.47	0.15 ± 0.04	0.06 ± 0.04	6.29 ± 3.57	0.11 ± 0.06	0.25 ± 0.01	1.47 ± 0.37	1.25 ± 0.68	0.83 ± 0.03	0.04 ± 0.02	0.69 ± 0.18	0.76 ± 0.14	0.62 ± 0.32	0.60 ± 0.23	2.98 ± 1.26	0.20 ± 0.05	0.10 ± 0.01	0.25 ± 0.06	1.07 ± 0.32	1.32 ± 0.30	0.43 ± 0.31	1.90 ± 0.52	0.26 ± 0.10
roots	6 h	cold + low light	cry2	22.08 ± 7.64	6.20 ± 2.73	13.71 ± 2.59	13.43 ± 2.65	39.67 ± 21.55	3.32 ± 1.38	0.22 ± 0.09	0.10 ± 0.02	2.71 ± 0.55	0.23 ± 0.02	0.26 ± 0.13	1.18 ± 0.28	2.99 ± 0.17	0.95 ± 0.32	0.11 ± 0.03	0.50 ± 0.25	0.73 ± 0.16	1.23 ± 0.11	0.76 ± 0.32	2.98 ± 0.70	0.36 ± 0.19	0.08 ± 0.02	0.25 ± 0.11	0.86 ± 0.23	1.61 ± 1.01	0.39 ± 0.20	2.42 ± 1.25	0.15 ± 0.05
roots	6 h	cold + low light	phyA	18.10 ± 11.67	7.66 ± 1.47	7.96 ± 2.64	9.85 ± 3.72	35.59 ± 26.89	2.94 ± 0.78	0.29 ± 0.13	0.08 ± 0.03	2.24 ± 0.38	0.19 ± 0.05	0.34 ± 0.09	1.85 ± 0.95	2.85 ± 0.83	1.28 ± 0.26	0.02 ± 0.01	0.52 ± 0.09	2.18 ± 0.86	0.85 ± 0.22	0.99 ± 0.21	2.64 ± 0.68	0.29 ± 0.00	0.07 ± 0.03	0.46 ± 0.04	1.49 ± 0.57	2.47 ± 1.11	0.59 ± 0.29	1.78 ± 0.86	0.28 ± 0.24
roots	6 h	cold + low light	phyB	50.85 ± 37.17	23.55 ± 5.75	11.87 ± 1.74	13.18 ± 5.05	64.03 ± 20.10	1.42 ± 1.11	0.53 ± 0.33	0.22 ± 0.10	3.86 ± 1.12	0.93 ± 0.31	0.16 ± 0.09	1.85 ± 1.20	2.49 ± 1.16	0.88 ± 0.53	0.06 ± 0.04	0.50 ± 0.25	1.71 ± 0.15	1.70 ± 0.47	1.67 ± 0.83	1.28 ± 0.65	0.60 ± 0.34	1.13 ± 0.79	1.17 ± 0.39	3.14 ± 1.38	3.05 ± 1.44	0.72 ± 0.39	2.64 ± 1.87	0.63 ± 0.33
roots	7 d	control	WT	0.09 ± 0.03	0.42 ± 0.20	0.44 ± 0.27	0.16 ± 0.08	1.39 ± 0.73	0.25 ± 0.08	0.20 ± 0.15	0.13 ± 0.08	0.27 ± 0.21	2.08 ± 0.74	0.71 ± 0.47	0.94 ± 0.55	0.57 ± 0.28	0.81 ± 0.34	2.58 ± 1.04	0.52 ± 0.25	0.68 ± 0.33	0.38 ± 0.15	0.29 ± 0.20	0.51 ± 0.30	0.07 ± 0.04	2.74 ± 1.39	1.19 ± 0.46	7.82 ± 0.49	0.67 ± 0.29	0.52 ± 0.25	0.41 ± 0.18	0.50 ± 0.31
roots	7 d	control	cry1	0.17 ± 0.10	0.41 ± 0.26	0.18 ± 0.11	0.15 ± 0.09	3.46 ± 0.98	0.67 ± 0.09	0.18 ± 0.08	0.07 ± 0.04	0.18 ± 0.13	1.73 ± 0.97	0.66 ± 0.35	0.52 ± 0.35	1.26 ± 0.18	1.17 ± 0.35	1.71 ± 0.50	0.53 ± 0.29	0.57 ± 0.31	0.35 ± 0.04	0.22 ± 0.10	0.33 ± 0.20	0.07 ± 0.02	2.22 ± 1.66	0.54 ± 0.39	7.61 ± 4.57	0.18 ± 0.05	0.46 ± 0.14	0.22 ± 0.13	0.60 ± 0.35
roots	7 d	control	cry2	0.13 ± 0.08	0.66 ± 0.17	0.18 ± 0.11	0.09 ± 0.03	2.47 ± 0.56	0.42 ± 0.09	0.26 ± 0.20	0.08 ± 0.05	0.16 ± 0.11	2.32 ± 1.40	1.92 ± 1.06	0.74 ± 0.47	2.09 ± 0.87	0.75 ± 0.34	1.34 ± 0.63	0.32 ± 0.14	0.86 ± 0.18	0.64 ± 0.11	0.49 ± 0.18	0.32 ± 0.15	0.11 ± 0.07	2.89 ± 1.98	0.54 ± 0.40	11.45 ± 6.87	0.46 ± 0.16	0.41 ± 0.11	0.39 ± 0.17	0.69 ± 0.31
roots	7 d	control	phyA	0.11 ± 0.06	0.97 ± 0.61	1.18 ± 0.38	0.63 ± 0.23	1.04 ± 0.59	0.38 ± 0.32	0.44 ± 0.20	0.16 ± 0.12	0.36 ± 0.12	1.41 ± 0.51	0.80 ± 0.43	0.94 ± 0.57	1.56 ± 0.59	1.77 ± 1.43	1.02 ± 0.45	0.74 ± 0.47	0.80 ± 0.64	0.24 ± 0.13	0.17 ± 0.10	0.62 ± 0.31	0.05 ± 0.03	4.37 ± 1.79	1.43 ± 0.50	6.70 ± 1.61	1.11 ± 0.18	0.89 ± 0.64	0.59 ± 0.25	2.42 ± 0.86
roots	7 d	control	phyB	0.10 ± 0.06	0.29 ± 0.19	0.19 ± 0.12	0.14 ± 0.08	1.52 ± 0.49	1.90 ± 1.29	0.35 ± 0.23	0.09 ± 0.05	0.18 ± 0.03	1.55 ± 1.04	1.53 ± 0.25	0.92 ± 0.38	0.96 ± 0.58	1.76 ± 0.36	3.66 ± 1.44	0.52 ± 0.30	0.81 ± 0.30	0.58 ± 0.27	0.35 ± 0.17	0.05 ± 0.02	0.28 ± 0.13	2.02 ± 0.72	1.35 ± 0.60	8.62 ± 5.17	1.70 ± 0.89	0.27 ± 0.10	0.23 ± 0.11	0.87 ± 0.51
roots	7 d	low light	WT	0.05 ± 0.03	0.65 ± 0.31	2.94 ± 1.38	2.31 ± 0.45	2.11 ± 0.67	2.89 ± 1.41	0.24 ± 0.19	0.54 ± 0.22	3.28 ± 1.98	0.51 ± 0.16	0.59 ± 0.50	1.27 ± 0.83	1.41 ± 0.43	2.74 ± 1.22	0.92 ± 0.79	0.90 ± 0.38	1.10 ± 0.33	1.02 ± 0.24	0.66 ± 0.39	0.68 ± 0.59	0.13 ± 0.05	1.86 ± 0.83	0.66 ± 0.19	1.79 ± 0.54	0.79 ± 0.42	0.91 ± 0.28	1.78 ± 1.06	0.12 ± 0.08
roots	7 d	low light	cry1	0.04 ± 0.03	0.34 ± 0.15	2.97 ± 1.85	1.90 ± 0.79	1.17 ± 0.34	0.99 ± 0.58	0.13 ± 0.08	0.39 ± 0.27	1.95 ± 0.71	0.27 ± 0.09	0.89 ± 0.57	0.71 ± 0.45	2.16 ± 0.80	2.58 ± 0.70	1.26 ± 0.56	1.19 ± 0.44	1.13 ± 0.50	0.59 ± 0.26	0.32 ± 0.21	0.48 ± 0.29	0.10 ± 0.04	0.74 ± 0.27	0.25 ± 0.10	1.42 ± 0.70	0.51 ± 0.32	0.90 ± 0.37	0.74 ± 0.46	0.11 ± 0.09
roots	7 d	low light	cry2	0.11 ± 0.07	0.64 ± 0.30	5.22 ± 1.81	3.13 ± 0.89	1.90 ± 0.88	1.04 ± 0.52	0.37 ± 0.16	0.65 ± 0.38	4.16 ± 1.24	0.26 ± 0.12	0.47 ± 0.36	1.42 ± 0.60	1.89 ± 0.77	2.07 ± 1.59	1.07 ± 0.88	0.62 ± 0.20	1.58 ± 0.56	0.81 ± 0.40	0.53 ± 0.26	0.35 ± 0.21	0.18 ± 0.07	1.62 ± 0.72	0.50 ± 0.16	2.30 ± 0.94	0.90 ± 0.58	1.45 ± 0.41	1.93 ± 1.03	0.23 ± 0.14
roots	7 d	low light	phyA	0.03 ± 0.03	0.31 ± 0.10	2.13 ± 0.81	1.46 ± 0.51	0.26 ± 0.22	2.46 ± 0.67	0.20 ± 0.12	0.36 ± 0.09	2.10 ± 0.78	0.38 ± 0.11	1.31 ± 0.29	1.42 ± 0.45	2.07 ± 0.59	4.43 ± 2.31	1.19 ± 0.86	0.51 ± 0.19	0.69 ± 0.22	0.56 ± 0.23	0.38 ± 0.20	0.19 ± 0.12	0.13 ± 0.03	1.84 ± 0.43	0.57 ± 0.25	2.44 ± 0.69	0.58 ± 0.10	2.11 ± 0.61	1.48 ± 0.51	0.17 ± 0.09
roots	7 d	low light	phyB	0.03 ± 0.02	0.27 ± 0.17	3.58 ± 1.43	1.32 ± 0.19	1.89 ± 0.33	1.26 ± 0.75	0.41 ± 0.36	1.31 ± 1.03	1.39 ± 0.76	0.18 ± 0.06	0.40 ± 0.31	0.74 ± 0.32	4.12 ± 0.97	1.53 ± 1.06	1.58 ± 1.29	0.63 ± 0.31	0.52 ± 0.26	0.51 ± 0.17	0.43 ± 0.30	0.46 ± 0.28	0.14 ± 0.08	1.58 ± 0.78	0.62 ± 0.23	2.88 ± 0.81	0.57 ± 0.38	1.15 ± 0.78	1.57 ± 1.06	0.20 ± 0.08
roots	7 d	cold	WT	14.96 ± 7.15	3.57 ± 1.11	3.76 ± 1.31	2.77 ± 0.66	5.92 ± 3.00	0.83 ± 0.30	1.39 ± 0.73	0.55 ± 0.21	1.86 ± 0.77	0.65 ± 0.26	0.50 ± 0.24	2.26 ± 0.79	4.47 ± 2.04	4.72 ± 1.44	0.56 ± 0.12	2.35 ± 0.54	1.59 ± 0.58	0.94 ± 0.52	1.21 ± 0.49	3.50 ± 2.30	0.13 ± 0.05	0.58 ± 0.33	0.77 ± 0.33	2.48 ± 0.87	0.74 ± 0.38	2.12 ± 1.20	2.55 ± 0.91	1.25 ± 0.66
roots	7 d	cold	cry1	3.77 ± 2.93	1.08 ± 0.54	4.39 ± 1.84	2.85 ± 1.25	5.36 ± 1.99	0.44 ± 0.17	1.34 ± 0.64	1.25 ± 1.06	2.51 ± 0.91	0.67 ± 0.22	0.21 ± 0.08	1.64 ± 0.76	9.94 ± 5.58	2.27 ± 0.83	0.92 ± 0.43	2.68 ± 1.66	1.69 ± 0.44	0.88 ± 0.18	1.16 ± 0.36	3.88 ± 2.20	0.08 ± 0.05	1.03 ± 0.60	0.35 ± 0.15	2.26 ± 0.93	0.66 ± 0.34	1.95 ± 1.14	2.93 ± 1.31	1.64 ± 0.57
roots	7 d	cold	cry2	8.36 ± 7.00	1.59 ± 0.43	2.62 ± 0.65	2.15 ± 0.97	2.91 ± 1.46	0.42 ± 0.18	1.21 ± 0.40	0.77 ± 0.62	5.66 ± 1.96	0.88 ± 0.09	0.34 ± 0.09	1.57 ± 0.45	10.72 ± 3.39	4.58 ± 3.01	1.51 ± 0.43	3.90 ± 1.45	1.94 ± 0.62	1.04 ± 0.11	1.08 ± 0.19	3.66 ± 1.50	0.16 ± 0.05	1.16 ± 0.30	0.48 ± 0.10	1.05 ± 0.18	0.84 ± 0.29	1.92 ± 1.19	3.74 ± 1.28	1.37 ± 0.14
roots	7 d	cold	phyA	5.18 ± 3.53	1.48 ± 0.85	5.04 ± 1.24	3.08 ± 0.83	4.82 ± 1.52	0.51 ± 0.32	1.40 ± 0.46	1.45 ± 0.70	2.97 ± 1.46	0.99 ± 0.32	0.52 ± 0.22	1.58 ± 0.96	8.25 ± 3.57	3.83 ± 2.58	0.96 ± 0.56	3.04 ± 1.44	2.23 ± 0.36	1.67 ± 0.60	1.03 ± 0.57	3.40 ± 1.17	0.09 ± 0.04	0.93 ± 0.57	0.42 ± 0.19	1.37 ± 0.50	0.84 ± 0.28	1.30 ± 0.57	1.54 ± 0.79	0.99 ± 0.47
roots	7 d	cold	phyB	3.26 ± 0.50	0.85 ± 0.37	5.50 ± 2.67	1.35 ± 0.26	2.36 ± 1.02	0.14 ± 0.09	1.96 ± 0.87	2.59 ± 1.76	5.56 ± 2.26	0.81 ± 0.10	0.17 ± 0.02	0.98 ± 0.12	7.97 ± 2.96	1.51 ± 0.75	0.49 ± 0.20	1.41 ± 0.76	1.44 ± 0.22	0.85 ± 0.20	0.66 ± 0.10	3.85 ± 2.40	0.10 ± 0.02	0.89 ± 0.29	0.52 ± 0.23	2.49 ± 1.57	0.81 ± 0.30	2.23 ± 0.54	2.17 ± 0.42	1.68 ± 0.79
roots	7 d	cold + low light	WT	2.34 ± 0.66	3.34 ± 0.85	1.62 ± 0.31	3.76 ± 1.76	3.62 ± 1.01	0.54 ± 0.13	0.70 ± 0.39	0.34 ± 0.25	3.13 ± 1.53	0.63 ± 0.33	0.65 ± 0.27	2.99 ± 0.30	2.66 ± 0.80	4.19 ± 1.06	0.44 ± 0.29	2.82 ± 0.34	1.03 ± 0.34	1.10 ± 0.22	1.43 ± 0.35	1.57 ± 0.58	0.11 ± 0.04	0.68 ± 0.17	0.76 ± 0.40	2.43 ± 0.51	0.48 ± 0.26	0.60 ± 0.19	3.33 ± 1.26	0.98 ± 0.45
roots	7 d	cold + low light	cry1	8.46 ± 3.64	3.10 ± 2.10	3.64 ± 0.84	4.62 ± 0.09	3.53 ± 0.24	1.05 ± 0.19	1.30 ± 0.42	0.10 ± 0.01	3.46 ± 1.13	1.01 ± 0.22	1.73 ± 0.60	6.40 ± 0.73	3.50 ± 1.85	7.21 ± 0.24	0.26 ± 0.05	5.68 ± 1.49	1.96 ± 0.89	0.92 ± 0.35	1.02 ± 0.49	1.47 ± 0.57	0.23 ± 0.00	0.47 ± 0.25	1.33 ± 0.31	2.68 ± 0.10	2.49 ± 0.63	1.75 ± 0.21	4.45 ± 1.10	0.71 ± 0.10
roots	7 d	cold + low light	cry2	5.25 ± 3.21	1.97 ± 1.18	1.51 ± 0.68	2.66 ± 0.59	3.57 ± 2.27	0.73 ± 0.26	1.21 ± 0.54	0.18 ± 0.14	3.38 ± 2.06	1.32 ± 0.34	1.66 ± 0.89	5.56 ± 1.80	4.36 ± 2.14	6.57 ± 2.39	0.36 ± 0.15	5.84 ± 2.33	2.46 ± 1.63	0.73 ± 0.36	1.51 ± 0.71	2.01 ± 0.87	0.23 ± 0.08	0.27 ± 0.20	0.79 ± 0.50	1.64 ± 0.51	2.92 ± 0.76	1.06 ± 0.81	3.48 ± 1.05	0.37 ± 0.23
roots	7 d	cold + low light	phyA	5.18 ± 4.38	1.70 ± 0.31	0.62 ± 0.19	1.54 ± 0.40	1.00 ± 0.17	0.28 ± 0.13	0.96 ± 0.15	0.16 ± 0.07	3.12 ± 1.17	0.67 ± 0.14	0.33 ± 0.20	3.55 ± 0.46	3.53 ± 0.99	2.83 ± 0.99	0.04 ± 0.02	3.15 ± 0.31	1.80 ± 0.44	0.54 ± 0.08	0.66 ± 0.02	0.68 ± 0.35	0.10 ± 0.03	0.10 ± 0.01	0.54 ± 0.10	1.08 ± 0.20	0.90 ± 0.18	0.92 ± 0.09	1.24 ± 0.18	0.37 ± 0.03
roots	7 d	cold + low light	phyB	5.16 ± 3.34	2.39 ± 0.70	0.70 ± 0.23	1.76 ± 0.57	1.13 ± 0.37	0.87 ± 0.25	0.70 ± 0.35	0.09 ± 0.03	1.94 ± 0.76	1.13 ± 0.37	1.35 ± 1.01	4.17 ± 1.27	5.13 ± 1.77	5.24 ± 2.39	0.10 ± 0.06	4.47 ± 2.21	2.71 ± 0.83	0.79 ± 0.16	1.03 ± 0.28	3.45 ± 1.69	0.16 ± 0.07	0.24 ± 0.18	1.14 ± 0.76	1.63 ± 0.70	1.73 ± 0.53	1.27 ± 0.88	2.86 ± 1.73	0.67 ± 0.19

## Sheet: Stat_var
tissue	time	variant	genotype	RD29A	COR47	CBF1	CBF2	CBF3	HY5	PIF3	PIF4	NCED3	PYL6	IPT3	IPT5	CKX5	ARR4	ARR5	ARR7	ARR10	CRF3	CRF4	GA2OX1	GA2OX6	RGA1	RGA2	RGL3	D14	MAX2	SMAX1	SMXL6
apices	30 min	control	WT	c	b	ab	a	a	a	b	b	bc	a	b	a	b	b	ab	b	ab	b	a	c	c	b	b	b	c	ab	ab	b
apices	30 min	control	cry1	bc	b	a	a	a	a	a	a	a	a	ab	b	a	b	a	a	ab	ab	a	b	b	a	b	a	c	b	b	a
apices	30 min	control	cry2	c	b	c	a	a	a	ab	b	b	a	a	a	ab	ab	ab	ab	b	b	a	ab	b	a	b	a	b	b	ab	b
apices	30 min	control	phyA	ab	b	abc	a	a	a	a	ab	a	a	ab	ab	ab	ab	b	ab	a	a	a	a	b	ab	b	b	ab	a	a	ab
apices	30 min	control	phyB	a	a	bc	a	a	a	a	a	c	a	b	b	ab	a	ab	ab	ab	ab	a	a	a	ab	a	b	a	ab	ab	a
apices	30 min	low light	WT	f	f	g	f	g	f	f	f	fg	f	g	f	f	f	g	f	f	f	f	gh	fg	f	f	g	f	fg	f	fg
apices	30 min	low light	cry1	f	g	g	gh	g	fg	f	g	f	f	f	f	f	fgh	f	g	g	g	g	fg	f	f	fg	f	g	f	f	f
apices	30 min	low light	cry2	fg	g	g	h	h	g	g	h	g	g	f	f	g	g	g	i	h	g	h	h	fg	fg	gh	g	gh	fg	f	f
apices	30 min	low light	phyA	g	h	g	h	h	g	g	i	fg	g	g	f	g	hi	gh	h	hi	h	gh	i	g	gh	gh	gh	gh	g	fg	g
apices	30 min	low light	phyB	f	h	f	g	f	f	g	i	f	g	g	f	f	i	h	i	i	gh	i	f	f	h	h	h	h	g	g	g
apices	30 min	cold	WT	lm	m	l	k	l	k	l	k	l	k	k	k	kl	kl	k	k	kl	m	l	k	kl	k	kl	l	k	l	k	k
apices	30 min	cold	cry1	klm	klm	kl	k	l	l	k	k	l	k	k	k	l	l	k	lm	kl	l	k	k	l	l	l	kl	k	l	k	k
apices	30 min	cold	cry2	kl	k	l	k	k	k	kl	k	lm	k	k	k	l	k	k	l	k	k	kl	k	kl	k	kl	kl	k	l	k	k
apices	30 min	cold	phyA	m	lm	kl	k	m	l	l	k	m	k	k	k	l	l	k	lm	kl	m	kl	k	l	k	kl	k	k	k	k	k
apices	30 min	cold	phyB	k	kl	k	k	lm	l	k	k	k	l	l	k	k	l	k	m	l	m	l	k	k	kl	k	k	k	l	k	k
apices	30 min	cold + low light	WT	q	q	r	q	s	pqr	r	r	s	q	q	q	qr	qr	p	pq	p	q	q	qr	r	p	pq	qr	q	s	r	r
apices	30 min	cold + low light	cry1	q	p	q	pq	pqr	q	r	p	r	q	s	q	r	q	p	p	p	q	q	pq	q	p	q	r	q	rs	s	r
apices	30 min	cold + low light	cry2	q	q	r	q	r	pq	r	q	s	r	qr	qr	qr	p	p	p	p	q	pq	r	r	p	q	qr	p	r	q	r
apices	30 min	cold + low light	phyA	p	pq	q	q	q	p	q	p	q	q	r	r	q	pq	p	pq	p	q	pq	qr	q	p	p	q	p	q	p	q
apices	30 min	cold + low light	phyB	p	q	p	p	p	r	p	p	p	p	p	p	p	r	p	q	p	p	p	p	p	p	p	p	q	p	p	p
apices	6 h	control	WT	ab	b	a	a	a	a	b	a	b	a	a	ab	b	b	a	b	a	b	ab	a	a	a	a	a	bc	ab	b	ab
apices	6 h	control	cry1	bc	ab	a	ab	a	a	b	a	ab	a	a	a	b	b	a	b	a	ab	a	a	b	a	a	bc	c	a	a	a
apices	6 h	control	cry2	c	ab	a	ab	a	a	a	a	a	a	a	ab	b	a	a	a	a	a	ab	a	ab	a	a	bc	ab	ab	a	b
apices	6 h	control	phyA	c	ab	a	a	a	a	ab	a	ab	a	a	bc	b	ab	a	ab	a	a	a	a	b	a	a	b	a	a	ab	ab
apices	6 h	control	phyB	a	a	a	b	a	a	b	a	ab	a	a	c	a	b	a	b	a	b	b	a	ab	a	a	c	abc	b	ab	c
apices	6 h	low light	WT	f	f	f	f	f	f	f	f	i	f	g	fg	g	f	g	f	f	f	f	f	g	fg	f	f	f	fg	fg	f
apices	6 h	low light	cry1	f	fg	h	hi	i	h	g	f	f	g	f	g	g	f	f	f	g	g	g	g	g	fg	f	f	f	fg	f	f
apices	6 h	low light	cry2	f	f	gh	i	h	h	gh	g	h	h	g	g	g	f	fg	f	h	h	g	g	g	f	f	f	f	f	f	f
apices	6 h	low light	phyA	g	g	fgh	gh	hi	i	gh	g	gh	g	fg	fg	g	g	h	f	h	g	g	g	g	g	f	f	f	fg	g	f
apices	6 h	low light	phyB	f	f	fg	g	g	g	h	h	fg	gh	fg	f	f	fg	gh	f	gh	g	g	g	f	g	f	f	f	g	g	f
apices	6 h	cold	WT	k	kl	k	k	k	kl	kl	l	k	k	k	k	kl	k	k	lm	m	kl	kl	l	k	kl	lm	kl	kl	l	l	l
apices	6 h	cold	cry1	l	kl	k	k	k	l	l	k	lm	l	m	k	k	k	k	k	k	l	k	l	l	l	k	m	l	l	l	l
apices	6 h	cold	cry2	k	kl	k	k	k	k	kl	l	k	k	m	k	l	k	k	l	l	kl	l	k	l	kl	l	kl	k	l	k	kl
apices	6 h	cold	phyA	kl	k	k	k	k	k	k	lm	l	kl	l	k	l	k	k	m	m	k	k	kl	kl	k	lm	k	k	l	k	k
apices	6 h	cold	phyB	l	l	k	k	k	kl	kl	m	m	l	m	k	l	l	k	lm	lm	k	kl	kl	k	kl	m	lm	kl	k	l	l
apices	6 h	cold + low light	WT	rs	r	pq	q	pq	pq	p	r	s	qr	p	q	q	q	q	qr	p	pqr	q	q	r	pq	q	pq	r	pq	qr	q
apices	6 h	cold + low light	cry1	pqr	p	q	p	p	q	p	p	q	q	p	p	pq	p	q	p	p	r	p	q	q	q	p	q	pq	q	qr	q
apices	6 h	cold + low light	cry2	s	q	pq	q	pq	pq	p	r	pqr	p	p	q	p	q	q	q	p	pq	pq	pq	pq	pq	q	pq	qr	q	r	q
apices	6 h	cold + low light	phyA	p	q	p	pq	pq	p	p	pq	p	q	p	q	pq	p	p	p	p	p	p	p	p	p	p	p	p	pq	p	p
apices	6 h	cold + low light	phyB	q	r	q	q	q	pq	p	qr	rs	r	p	q	pq	q	q	r	p	qr	q	r	pq	pq	q	q	qr	p	q	q
apices	7 d	control	WT	a	b	b	ab	ab	ab	ab	a	b	ab	a	b	b	a	c	ab	b	a	a	ab	ab	a	a	c	b	a	a	a
apices	7 d	control	cry1	b	b	b	b	c	b	a	a	a	b	b	a	ab	b	ab	b	a	a	a	b	c	a	a	ab	b	b	a	b
apices	7 d	control	cry2	ab	b	ab	ab	c	ab	b	a	ab	b	b	a	b	ab	b	ab	ab	a	a	b	b	a	a	bc	ab	b	a	b
apices	7 d	control	phyA	ab	a	a	a	bc	a	ab	a	ab	a	ab	b	ab	a	a	a	ab	b	a	b	abc	a	a	a	a	b	a	b
apices	7 d	control	phyB	a	ab	ab	ab	a	a	a	a	ab	b	ab	b	a	a	ab	b	b	a	a	a	a	a	a	b	ab	b	a	b
apices	7 d	low light	WT	g	g	f	f	f	f	g	gh	h	f	f	f	g	fg	f	fg	f	f	g	f	g	g	g	g	f	fg	fg	f
apices	7 d	low light	cry1	f	f	f	g	f	f	fg	f	g	f	fg	f	f	fg	f	f	f	f	f	f	g	fg	f	f	f	f	f	fg
apices	7 d	low light	cry2	f	fg	g	g	f	f	g	fg	gh	f	f	f	fg	f	f	f	f	f	fg	f	g	f	f	fg	f	fg	fg	f
apices	7 d	low light	phyA	f	fg	f	f	f	f	f	gh	g	f	f	f	g	fg	f	g	f	f	g	f	g	f	fg	fg	f	fg	fg	fg
apices	7 d	low light	phyB	f	fg	g	fg	f	f	g	h	f	f	g	f	f	g	f	g	f	f	g	f	f	f	fg	g	f	g	g	g
apices	7 d	cold	WT	l	k	m	m	l	k	m	l	n	m	k	m	m	k	kl	k	m	l	kl	m	k	k	m	m	l	k	l	lm
apices	7 d	cold	cry1	k	k	k	k	k	k	k	k	k	k	k	k	k	k	k	l	k	lm	kl	k	k	k	k	k	k	k	k	k
apices	7 d	cold	cry2	l	k	l	lm	k	k	l	k	l	kl	k	l	kl	k	kl	kl	l	k	k	kl	k	l	lm	k	kl	k	kl	kl
apices	7 d	cold	phyA	kl	k	k	kl	m	k	kl	k	lm	lm	m	k	l	k	k	l	l	m	kl	l	k	l	kl	l	l	l	kl	mn
apices	7 d	cold	phyB	kl	k	m	m	m	k	lm	k	m	m	l	m	l	k	l	l	m	m	l	m	k	l	m	lm	kl	l	kl	n
apices	7 d	cold + low light	WT	q	pq	q	pq	p	p	p	q	rs	r	r	q	r	r	q	p	q	p	q	qr	pq	p	r	q	p	qr	qr	pqr
apices	7 d	cold + low light	cry1	p	p	q	pq	q	p	p	p	p	r	r	p	p	qr	p	p	pq	p	p	r	p	p	p	q	p	p	p	p
apices	7 d	cold + low light	cry2	q	q	q	q	p	p	p	p	s	r	r	pq	pq	qr	pq	q	q	p	q	pqr	q	q	qr	q	p	r	qr	s
apices	7 d	cold + low light	phyA	q	p	q	p	p	p	p	q	qr	q	p	q	pq	p	pq	pq	p	p	p	p	pq	q	p	pq	p	pq	q	q
apices	7 d	cold + low light	phyB	q	p	p	p	p	p	p	p	pq	p	q	q	qr	q	pq	p	q	p	q	q	p	pq	pq	p	p	pq	r	r
leaves	30 min	control	WT	b	ab	b	a	a	a	ab	a	a	a	a	a	bc	ab	a	a	a	a	ab	a	a	a	abc	c	ab	a	b	b
leaves	30 min	control	cry1	a	c	ab	c	b	a	b	a	a	a	b	a	c	b	a	ab	a	a	b	b	b	a	c	bc	b	a	ab	b
leaves	30 min	control	cry2	a	a	ab	ab	a	a	ab	a	a	a	ab	a	ab	ab	a	ab	ab	a	ab	ab	a	a	ab	a	ab	a	ab	ab
leaves	30 min	control	phyA	a	abc	a	bc	ab	a	a	ab	a	a	ab	a	c	a	a	ab	a	a	a	ab	ab	a	a	ab	a	a	a	a
leaves	30 min	control	phyB	ab	bc	ab	abc	ab	a	b	b	a	b	ab	a	a	ab	a	b	b	a	b	a	ab	a	bc	bc	ab	a	ab	ab
leaves	30 min	low light	WT	g	f	fg	fg	fgh	gh	g	fg	fg	g	h	f	hi	fg	fg	f	f	fg	g	f	fg	h	h	g	g	g	g	g
leaves	30 min	low light	cry1	f	f	fg	f	fg	fg	f	f	fg	f	f	f	gh	f	f	f	f	f	f	f	f	fg	f	f	f	f	f	f
leaves	30 min	low light	cry2	g	fg	g	g	gh	h	g	fg	g	f	gh	f	i	g	g	g	f	fg	fg	f	g	gh	g	f	fg	f	fg	fg
leaves	30 min	low light	phyA	g	g	fg	fg	h	fgh	fg	g	fg	f	f	f	g	fg	fg	fg	f	g	g	f	g	fg	g	f	fg	f	f	f
leaves	30 min	low light	phyB	f	g	f	f	f	f	f	fg	f	f	fg	f	f	g	g	fg	f	f	g	f	f	f	g	f	f	f	fg	f
leaves	30 min	cold	WT	kl	l	m	l	l	k	l	l	l	k	l	l	mn	kl	kl	lm	m	l	k	m	l	l	k	l	k	k	kl	k
leaves	30 min	cold	cry1	lm	k	k	kl	kl	k	k	k	k	k	k	kl	lm	k	k	k	k	k	k	lm	k	lmn	l	k	k	kl	k	l
leaves	30 min	cold	cry2	m	k	l	k	kl	k	l	k	l	k	kl	kl	l	k	l	l	kl	m	k	lm	l	n	l	kl	k	l	kl	l
leaves	30 min	cold	phyA	m	l	m	l	kl	k	l	kl	l	k	l	kl	n	kl	kl	l	lm	l	k	k	l	k	kl	k	k	kl	l	kl
leaves	30 min	cold	phyB	k	l	m	l	k	k	l	l	kl	k	kl	k	k	l	l	m	m	klm	k	kl	l	m	k	l	l	k	m	k
leaves	30 min	cold + low light	WT	p	p	q	p	p	p	p	q	pq	p	pq	pq	q	qr	p	pq	pq	p	pq	p	p	pq	pq	p	pq	p	pq	pqr
leaves	30 min	cold + low light	cry1	pq	p	pq	p	p	p	p	p	pq	p	pq	q	q	pq	p	p	pq	p	pq	p	p	p	p	p	p	p	p	q
leaves	30 min	cold + low light	cry2	p	p	pq	p	p	p	p	q	p	p	p	p	q	pq	q	pq	pq	p	pq	p	p	p	pq	p	p	p	pq	p
leaves	30 min	cold + low light	phyA	pq	p	pq	p	p	p	p	pq	pq	p	p	p	q	p	q	p	p	p	p	p	p	p	p	p	pq	p	p	p
leaves	30 min	cold + low light	phyB	q	p	p	p	p	p	p	pq	q	p	q	q	p	r	q	q	q	p	q	p	p	q	q	p	q	q	q	r
leaves	6 h	control	WT	c	bc	a	ab	b	b	a	a	b	a	a	b	b	a	a	b	a	b	a	b	a	a	b	b	b	a	a	a
leaves	6 h	control	cry1	bc	c	a	a	ab	b	a	a	a	a	a	b	b	a	a	ab	a	ab	a	b	a	a	ab	ab	b	a	a	a
leaves	6 h	control	cry2	a	abc	a	a	a	b	a	a	ab	a	a	ab	b	a	a	ab	a	ab	a	b	a	a	ab	a	b	a	a	a
leaves	6 h	control	phyA	ab	ab	a	b	b	b	a	a	a	a	a	a	b	a	a	b	a	a	a	b	a	a	a	b	b	a	a	a
leaves	6 h	control	phyB	bc	a	a	a	a	a	a	a	ab	a	a	a	a	a	a	a	a	a	a	a	a	a	ab	a	a	a	a	a
leaves	6 h	low light	WT	fg	f	f	f	f	f	f	f	f	f	f	f	g	f	f	f	f	f	f	f	g	f	f	f	f	f	f	f
leaves	6 h	low light	cry1	f	fg	g	g	h	h	g	gh	gh	f	f	f	g	fg	f	g	fg	f	g	g	g	fg	f	fg	fg	g	g	g
leaves	6 h	low light	cry2	g	fg	fg	g	g	h	g	fg	h	f	f	f	g	f	f	g	f	f	f	g	g	g	f	fg	f	fg	g	g
leaves	6 h	low light	phyA	g	h	fg	fg	g	h	g	gh	fg	f	f	f	g	f	f	g	fg	f	fg	g	g	g	f	fg	fg	f	g	fg
leaves	6 h	low light	phyB	f	gh	fg	fg	g	g	g	h	fg	f	f	f	f	g	f	h	g	f	g	g	f	g	f	g	g	f	g	fg
leaves	6 h	cold	WT	l	l	k	lm	kl	lm	k	kl	kl	k	k	l	kl	l	k	k	kl	k	k	m	kl	kl	k	l	k	k	m	l
leaves	6 h	cold	cry1	kl	kl	k	kl	l	m	kl	k	k	k	l	k	klm	l	l	k	k	k	k	lm	klm	kl	k	kl	k	k	k	k
leaves	6 h	cold	cry2	k	k	k	l	k	l	l	l	kl	k	l	kl	lm	l	l	k	k	k	k	k	m	k	k	kl	k	k	l	l
leaves	6 h	cold	phyA	kl	k	k	k	l	k	l	k	l	k	l	kl	m	k	k	k	k	k	k	l	k	kl	l	k	k	k	klm	kl
leaves	6 h	cold	phyB	kl	kl	k	m	kl	kl	l	k	kl	k	kl	kl	k	l	l	k	l	k	k	lm	l	l	k	l	k	l	m	m
leaves	6 h	cold + low light	WT	p	p	pq	pq	p	pq	p	p	p	pq	pq	pq	p	pq	p	p	p	p	pq	p	p	p	p	p	p	p	p	pq
leaves	6 h	cold + low light	cry1	p	p	p	p	p	r	p	p	p	q	p	p	p	p	pq	p	p	q	p	p	p	p	q	p	p	q	p	qr
leaves	6 h	cold + low light	cry2	p	p	qr	q	pq	p	pq	p	pq	pq	q	q	p	pq	pq	p	p	p	pq	p	p	p	pq	p	pq	pq	p	p
leaves	6 h	cold + low light	phyA	p	p	qr	pq	q	p	pq	p	pq	pq	q	qr	p	pq	q	p	p	pq	p	p	p	p	pq	p	pq	p	p	p
leaves	6 h	cold + low light	phyB	p	p	r	pq	pq	q	q	p	q	p	q	r	p	q	q	q	q	pq	q	q	p	p	q	p	q	pq	q	r
leaves	7 d	control	WT	a	ab	a	ab	a	b	a	a	a	a	a	a	a	a	a	a	a	a	a	a	b	a	bc	abc	a	a	a	a
leaves	7 d	control	cry1	a	ab	ab	b	c	ab	a	a	b	a	a	ab	a	a	a	a	a	a	a	a	b	ab	a	a	ab	ab	a	ab
leaves	7 d	control	cry2	a	b	b	a	bc	b	a	a	b	a	a	ab	a	a	a	a	a	a	a	a	b	a	ab	b	b	b	b	b
leaves	7 d	control	phyA	b	b	ab	ab	a	ab	a	a	ab	a	a	b	a	a	a	a	a	a	a	a	b	b	c	bc	ab	ab	ab	b
leaves	7 d	control	phyB	a	a	ab	a	ab	a	a	a	ab	a	a	ab	a	a	a	a	a	a	a	a	a	ab	abc	c	ab	ab	a	b
leaves	7 d	low light	WT	gh	g	f	g	f	f	f	f	f	g	f	f	g	fg	g	fg	f	f	f	f	g	g	g	f	f	g	f	f
leaves	7 d	low light	cry1	f	f	f	g	f	g	f	f	f	g	f	fg	f	f	f	f	f	f	f	g	g	f	f	f	f	f	f	f
leaves	7 d	low light	cry2	h	g	f	g	f	fg	f	f	f	fg	f	fg	g	f	g	fg	f	f	f	f	g	g	fg	f	f	f	f	f
leaves	7 d	low light	phyA	fgh	g	f	f	f	fg	f	f	f	f	f	fg	fg	f	f	g	f	f	f	f	f	f	fg	f	f	f	f	f
leaves	7 d	low light	phyB	fg	f	f	fg	f	fg	f	f	f	fg	f	g	f	g	g	g	f	f	f	fg	f	g	fg	f	f	fg	f	f
leaves	7 d	cold	WT	k	l	m	l	l	k	lm	kl	l	l	k	m	l	k	l	k	l	l	lm	m	kl	k	lm	m	lm	k	k	k
leaves	7 d	cold	cry1	k	k	kl	k	k	k	k	k	k	k	l	k	k	k	k	kl	k	k	k	k	kl	kl	k	k	k	k	k	kl
leaves	7 d	cold	cry2	kl	kl	k	k	k	k	l	kl	k	l	l	l	k	l	kl	l	k	kl	l	k	kl	lm	kl	kl	kl	l	kl	l
leaves	7 d	cold	phyA	kl	kl	l	k	l	l	m	l	k	l	l	l	l	kl	k	l	k	m	n	l	l	n	m	m	k	l	l	m
leaves	7 d	cold	phyB	l	l	k	k	kl	m	lm	k	k	l	m	lm	l	m	m	m	kl	lm	mn	m	k	mn	l	lm	m	l	l	m
leaves	7 d	cold + low light	WT	q	q	r	r	pqr	pq	pqr	p	pqr	p	p	r	p	pq	p	pq	q	p	p	p	q	q	pq	p	q	p	p	p
leaves	7 d	cold + low light	cry1	p	p	q	q	p	p	qr	p	pq	p	p	p	p	p	p	p	p	p	p	p	p	p	pq	qr	p	p	p	p
leaves	7 d	cold + low light	cry2	p	q	r	r	qr	p	r	p	qr	p	q	qr	p	p	p	q	p	p	p	p	q	pq	q	r	p	p	p	p
leaves	7 d	cold + low light	phyA	p	q	r	r	r	p	p	p	r	p	q	pq	p	p	p	pq	pq	p	p	p	q	p	p	pqr	p	p	p	p
leaves	7 d	cold + low light	phyB	p	p	p	p	pq	q	pq	p	p	q	q	pqr	p	q	p	pq	pq	p	p	q	pq	pq	pq	pq	p	p	p	p
roots	30 min	control	WT	ab	a	a	a	a	ab	a	a	ab	b	a	a	a	a	a	a	a	a	ab	a	ab	a	a	ab	b	ab	a	ab
roots	30 min	control	cry1	a	a	b	c	a	b	a	c	ab	a	ab	b	a	a	a	a	b	b	a	a	c	a	b	b	b	ab	b	ab
roots	30 min	control	cry2	b	a	b	bc	b	a	b	bc	ab	ab	b	b	a	a	a	a	a	b	b	a	c	a	b	b	b	b	b	a
roots	30 min	control	phyA	a	a	ab	bc	c	ab	a	b	a	ab	ab	ab	a	a	a	a	ab	a	ab	a	a	a	b	a	a	ab	a	b
roots	30 min	control	phyB	ab	a	ab	ab	a	a	ab	ab	b	ab	b	a	a	a	a	a	a	a	ab	a	bc	a	b	ab	b	a	a	ab
roots	30 min	low light	WT	fg	gh	fg	gh	f	gh	h	f	h	f	h	h	h	g	g	g	f	fg	fg	f	fg	f	f	g	fgh	fg	f	f
roots	30 min	low light	cry1	fg	g	f	f	f	fg	f	f	fg	f	f	f	f	f	fg	f	f	f	f	f	f	f	f	f	fg	fg	f	f
roots	30 min	low light	cry2	g	i	f	fg	g	h	fg	f	gh	f	gh	g	gh	g	f	fg	f	fg	gh	f	g	fg	g	fg	gh	gh	g	f
roots	30 min	low light	phyA	fg	hi	g	h	h	i	h	g	h	f	fg	gh	g	g	fg	fg	f	g	h	g	f	g	g	g	h	h	g	g
roots	30 min	low light	phyB	f	f	fg	f	f	f	gh	f	f	f	fg	f	gh	f	g	f	f	g	f	f	g	f	f	f	f	f	f	f
roots	30 min	cold	WT	k	l	l	m	m	klm	k	k	k	k	kl	k	k	kl	m	lm	k	k	k	klm	m	k	k	kl	kl	k	lm	k
roots	30 min	cold	cry1	k	l	kl	l	l	l	k	l	kl	k	kl	kl	lm	l	l	kl	l	k	l	lm	l	kl	l	kl	k	lm	k	l
roots	30 min	cold	cry2	kl	k	k	k	k	k	k	l	l	k	k	m	kl	k	k	k	k	k	kl	k	k	l	l	k	k	m	m	k
roots	30 min	cold	phyA	m	l	l	m	n	m	k	l	kl	k	l	lm	mn	k	l	klm	kl	k	l	kl	lm	m	l	kl	k	kl	kl	k
roots	30 min	cold	phyB	l	m	l	m	m	m	k	l	kl	k	l	lm	n	m	lm	m	l	k	l	m	m	l	l	l	l	m	m	k
roots	30 min	cold + low light	WT	q	p	p	pq	pq	p	p	q	pq	p	p	p	pq	pq	r	pq	p	pq	pq	p	p	p	pq	p	p	p	p	pq
roots	30 min	cold + low light	cry1	r	q	p	p	q	q	p	pq	p	q	r	q	q	r	pq	q	q	q	r	pq	q	r	r	q	p	q	r	pq
roots	30 min	cold + low light	cry2	p	pqr	p	q	q	pq	p	pq	p	r	q	p	p	p	p	p	pq	p	p	qr	p	pq	p	p	p	p	p	p
roots	30 min	cold + low light	phyA	pq	r	p	pq	q	q	p	pq	qr	q	qr	q	q	q	s	q	q	q	pq	pq	q	qr	q	p	p	p	q	p
roots	30 min	cold + low light	phyB	r	pq	p	p	p	q	p	p	r	qr	s	q	q	r	qr	pq	q	pq	qr	r	q	r	r	q	p	q	qr	q
roots	6 h	control	WT	a	a	a	a	a	ab	ab	a	b	ab	a	a	a	b	a	a	a	a	a	a	ab	b	ab	a	a	a	a	a
roots	6 h	control	cry1	a	ab	a	a	a	ab	ab	a	abc	b	b	a	a	ab	a	a	ab	a	a	a	ab	a	ab	a	a	b	a	ab
roots	6 h	control	cry2	a	b	a	a	ab	a	a	a	a	a	b	a	a	ab	a	a	ab	a	a	a	a	a	a	a	a	a	a	a
roots	6 h	control	phyA	a	ab	a	a	b	b	a	a	c	ab	ab	a	a	a	a	a	b	ab	ab	a	b	a	a	a	a	b	a	b
roots	6 h	control	phyB	a	ab	a	a	a	ab	b	a	c	ab	ab	a	a	ab	a	a	a	b	b	a	a	b	b	a	a	b	a	ab
roots	6 h	low light	WT	f	fg	fg	f	fg	f	gh	fg	g	fg	gh	g	fgh	gh	g	g	fg	gh	fgh	f	fg	f	f	gh	gh	fgh	f	f
roots	6 h	low light	cry1	f	gh	f	f	g	f	f	h	f	f	fg	f	g	g	f	f	f	f	g	g	g	f	f	f	h	g	f	g
roots	6 h	low light	cry2	g	h	g	f	fg	f	f	g	f	f	fg	g	h	h	fgh	fgh	g	f	f	fg	g	f	f	gh	g	h	fg	fg
roots	6 h	low light	phyA	f	f	fg	f	f	g	fg	fg	g	h	f	g	f	f	fg	g	fg	h	hi	gh	fg	f	f	fg	f	f	fg	fg
roots	6 h	low light	phyB	f	fgh	h	f	fg	f	h	f	g	gh	h	fg	i	i	h	h	g	fg	i	h	f	f	f	h	i	i	g	h
roots	6 h	cold	WT	l	k	k	kl	kl	kl	kl	l	kl	k	k	k	k	kl	kl	k	k	kl	kl	k	k	k	k	k	kl	k	l	k
roots	6 h	cold	cry1	k	k	k	l	k	k	l	m	k	kl	k	k	k	k	k	l	k	k	k	l	kl	k	k	k	k	l	k	k
roots	6 h	cold	cry2	l	k	kl	kl	k	k	k	klm	kl	l	k	kl	k	k	kl	kl	kl	kl	k	l	k	k	k	k	k	l	kl	k
roots	6 h	cold	phyA	m	k	kl	k	kl	l	kl	m	m	kl	k	l	k	kl	kl	klm	lm	l	kl	m	kl	k	k	k	kl	l	l	k
roots	6 h	cold	phyB	lm	k	l	kl	l	l	m	k	lm	kl	k	l	k	l	l	m	m	kl	l	m	l	k	k	k	l	kl	l	k
roots	6 h	cold + low light	WT	q	qr	r	q	q	p	q	r	pq	qr	p	p	q	q	pq	p	q	pq	q	p	p	r	r	q	p	p	p	pq
roots	6 h	cold + low light	cry1	p	r	p	p	p	p	pq	qr	p	r	p	p	q	q	q	p	q	q	q	pq	p	q	r	q	p	p	p	pq
roots	6 h	cold + low light	cry2	pq	qr	p	p	q	p	pq	pq	pq	q	p	p	p	pq	p	p	q	p	pq	p	p	qr	r	q	p	p	p	q
roots	6 h	cold + low light	phyA	pq	q	qr	pq	q	p	p	q	q	qr	p	p	p	p	q	p	p	q	pq	p	p	qr	q	pq	p	p	p	pq
roots	6 h	cold + low light	phyB	pq	p	pq	p	pq	p	pq	p	p	p	p	p	pq	pq	pq	p	p	p	p	q	p	p	p	p	p	p	p	p
roots	7 d	control	WT	a	a	b	b	bc	b	a	a	a	a	b	a	b	b	ab	a	a	a	ab	a	b	a	ab	a	ab	a	ab	b
roots	7 d	control	cry1	a	a	b	b	a	ab	a	a	a	a	b	a	a	ab	bc	a	a	a	ab	a	b	a	b	a	c	a	ab	b
roots	7 d	control	cry2	a	a	b	b	ab	b	a	a	a	a	ab	a	a	b	bc	a	a	a	a	a	ab	a	b	a	b	a	ab	b
roots	7 d	control	phyA	a	a	a	a	c	ab	a	a	a	a	b	a	a	ab	c	a	a	a	b	a	b	a	a	a	a	a	a	a
roots	7 d	control	phyB	a	a	b	b	bc	a	a	a	a	a	a	a	ab	a	a	a	a	a	ab	b	a	a	ab	a	a	a	b	b
roots	7 d	low light	WT	f	f	fg	fg	f	fg	f	f	fg	f	fg	f	g	f	f	fg	fg	f	f	f	f	f	f	f	f	fg	f	f
roots	7 d	low light	cry1	f	f	fg	fgh	f	g	f	f	g	gh	fg	f	g	f	f	f	fg	fg	f	f	f	g	g	f	f	g	f	f
roots	7 d	low light	cry2	f	f	f	f	f	g	f	f	f	fgh	g	f	g	f	f	fg	f	fg	f	f	f	fg	f	f	f	fg	f	f
roots	7 d	low light	phyA	f	f	g	gh	g	f	f	f	g	fg	f	f	g	f	f	g	g	fg	f	f	f	f	fg	f	f	f	f	f
roots	7 d	low light	phyB	f	f	fg	h	f	fg	f	f	g	h	g	f	f	f	f	fg	g	g	f	f	f	fg	f	f	f	fg	f	f
roots	7 d	cold	WT	k	k	kl	k	k	k	k	l	m	k	kl	k	l	k	l	kl	kl	kl	kl	k	k	k	k	k	k	k	kl	k
roots	7 d	cold	cry1	l	l	kl	kl	k	k	k	kl	lm	k	lm	kl	kl	l	kl	kl	kl	l	k	k	k	k	k	k	k	k	kl	k
roots	7 d	cold	cry2	kl	l	l	kl	k	k	k	kl	k	k	kl	k	k	kl	k	k	kl	kl	k	k	k	k	k	l	k	k	k	k
roots	7 d	cold	phyA	kl	l	k	k	k	kl	k	k	klm	k	k	kl	kl	kl	kl	kl	k	k	kl	k	k	k	k	kl	k	k	l	k
roots	7 d	cold	phyB	l	l	kl	l	k	l	k	k	kl	k	m	l	kl	l	l	l	l	l	l	k	k	k	k	kl	k	k	kl	k
roots	7 d	cold + low light	WT	q	p	q	pq	p	q	p	p	p	q	qr	r	p	qr	p	q	q	p	p	pq	q	p	pq	pq	q	q	p	p
roots	7 d	cold + low light	cry1	p	pq	p	p	p	p	p	p	p	pq	p	p	p	p	p	p	pq	pq	q	pq	p	pq	p	p	p	p	p	pq
roots	7 d	cold + low light	cry2	pq	pq	qr	q	pq	pq	p	p	p	p	pq	pq	p	pq	p	p	pq	pq	p	p	pq	qr	pq	qr	p	pq	p	pq
roots	7 d	cold + low light	phyA	pq	q	s	r	r	r	p	p	p	q	r	qr	p	r	q	q	pq	q	q	q	q	r	q	r	q	pq	q	q
roots	7 d	cold + low light	phyB	pq	pq	rs	qr	qr	pq	p	p	p	pq	pqr	qr	p	pqr	q	pq	p	p	p	p	pq	qr	pq	qr	p	pq	pq	pq

## Sheet: Stat_gen
tissue	time	variant	genotype	RD29A	COR47	CBF1	CBF2	CBF3	HY5	PIF3	PIF4	NCED3	PYL6	IPT3	IPT5	CKX5	ARR4	ARR5	ARR7	ARR10	CRF3	CRF4	GA2OX1	GA2OX6	RGA1	RGA2	RGL3	D14	MAX2	SMAX1	SMXL6
apices	30 min	control	WT	D	C	B	C	C	B	D	B	B	B	C	AB	B	C	BC	C	C	BC	C	C	B	D	B	C	C	BC	C	A
apices	30 min	low light	WT	B	A	C	B	D	B	B	A	C	B	C	BC	AB	A	B	B	A	A	B	B	A	B	A	B	A	B	B	A
apices	30 min	cold	WT	A	B	A	A	A	A	A	A	A	A	B	C	A	AB	A	A	B	AB	A	A	A	A	AB	B	A	A	A	A
apices	30 min	cold + low light	WT	C	AB	A	A	B	B	C	B	B	A	A	A	AB	B	C	B	C	C	AB	B	A	C	AB	A	B	C	C	A
apices	30 min	control	cry1	F	G	F	F	F	E	G	F	F	F	F	F	E	F	F	F	F	F	F	F	G	F	F	E	G	F	G	E
apices	30 min	low light	cry1	EF	F	G	F	G	F	F	E	G	F	E	F	E	E	E	F	F	G	G	E	F	E	EF	F	F	E	F	F
apices	30 min	cold	cry1	E	EF	EF	E	E	EF	E	E	E	E	E	F	EF	E	E	E	E	E	E	E	F	E	EF	F	E	EF	E	F
apices	30 min	cold + low light	cry1	F	E	E	E	E	G	FG	E	EF	E	F	E	F	E	F	E	E	F	F	E	E	F	E	F	EF	EF	G	F
apices	30 min	control	cry2	K	K	J	J	K	IJ	IJ	L	K	IJ	J	I	IJ	L	JK	J	K	J	J	J	J	K	K	I	K	J	L	I
apices	30 min	low light	cry2	J	J	K	K	L	J	K	J	K	K	I	J	J	K	J	J	K	K	K	J	IJ	J	J	J	J	I	K	J
apices	30 min	cold	cry2	I	I	I	I	I	I	I	I	I	I	IJ	J	I	I	I	I	I	I	I	I	I	I	I	J	IJ	I	I	I
apices	30 min	cold + low light	cry2	J	IJ	I	I	J	J	J	K	J	J	IJ	IJ	I	J	K	I	J	J	I	J	IJ	K	IJ	IJ	I	I	J	IJ
apices	30 min	control	phyA	N	N	O	N	O	M	N	N	N	MN	N	MN	MN	M	N	N	M	M	M	MN	O	N	N	MN	N	N	N	M
apices	30 min	low light	phyA	N	N	P	O	P	O	N	N	O	O	N	N	N	M	N	N	N	N	N	N	NO	N	N	N	N	N	N	N
apices	30 min	cold	phyA	MN	M	N	M	N	N	M	M	N	M	M	MN	M	M	M	M	M	M	M	M	N	M	MN	M	M	M	M	N
apices	30 min	cold + low light	phyA	M	M	M	M	M	O	M	M	M	N	MN	M	M	M	N	M	M	M	M	N	M	MN	M	M	M	M	M	M
apices	30 min	control	phyB	R	R	S	R	S	Q	R	R	S	R	R	R	R	QR	R	R	QR	RS	R	Q	S	R	R	S	R	R	R	R
apices	30 min	low light	phyB	R	R	S	R	S	Q	R	R	T	S	R	R	R	S	R	R	S	S	S	Q	RS	R	S	S	R	R	R	T
apices	30 min	cold	phyB	Q	Q	R	Q	R	Q	Q	Q	R	R	R	R	Q	Q	Q	Q	Q	R	Q	Q	R	Q	Q	R	Q	R	Q	S
apices	30 min	cold + low light	phyB	Q	Q	Q	Q	Q	S	Q	Q	Q	Q	Q	Q	Q	R	R	Q	R	Q	Q	Q	Q	QR	Q	Q	Q	Q	Q	Q
apices	6 h	control	WT	C	C	C	C	C	C	B	A	B	AB	B	A	B	B	B	A	B	B	C	C	B	BC	B	B	B	B	D	C
apices	6 h	low light	WT	B	B	B	B	B	B	A	A	B	A	B	A	A	A	A	A	A	A	B	B	B	A	A	A	A	A	A	B
apices	6 h	cold	WT	A	A	A	A	A	AB	B	B	A	AB	A	A	AB	AB	B	A	B	A	B	A	A	B	B	A	A	B	C	BC
apices	6 h	cold + low light	WT	A	A	A	A	A	A	B	B	A	B	A	A	AB	AB	C	A	AB	A	A	A	A	C	B	A	A	B	B	A
apices	6 h	control	cry1	G	H	G	F	F	F	G	F	G	EF	G	F	F	H	F	F	F	F	G	F	H	F	G	G	G	F	F	F
apices	6 h	low light	cry1	F	G	G	F	G	G	E	E	F	F	F	F	F	F	E	F	F	F	G	F	G	E	E	EF	F	E	E	F
apices	6 h	cold	cry1	F	F	F	E	E	E	G	G	FG	F	G	F	EF	G	F	E	E	E	F	E	F	F	F	F	F	F	F	E
apices	6 h	cold + low light	cry1	E	E	E	E	E	E	F	G	E	E	E	G	E	E	G	E	F	E	E	E	E	F	G	E	E	F	EF	E
apices	6 h	control	cry2	K	L	K	K	J	J	J	J	J	J	J	I	K	I	IJ	I	JK	J	K	K	K	J	J	K	L	K	K	J
apices	6 h	low light	cry2	J	K	K	K	K	J	I	I	J	K	JK	I	J	I	I	J	K	K	K	K	K	I	I	J	K	I	I	J
apices	6 h	cold	cry2	I	J	J	I	I	I	K	K	I	J	K	I	JK	I	J	I	J	I	J	I	J	IJ	J	I	J	K	J	I
apices	6 h	cold + low light	cry2	I	I	I	J	I	I	IJK	K	I	I	I	I	I	I	K	I	I	I	I	J	I	IJ	K	I	I	J	J	I
apices	6 h	control	phyA	P	O	P	N	O	N	N	MN	O	N	M	N	N	N	MN	NO	MNO	O	O	N	O	O	MN	P	P	N	O	O
apices	6 h	low light	phyA	O	O	O	N	O	N	M	M	O	N	M	MN	N	N	M	O	O	P	O	O	O	M	M	O	O	M	N	O
apices	6 h	cold	phyA	N	N	N	M	M	M	N	N	N	MN	M	N	N	N	MN	N	N	M	N	M	N	MN	N	N	N	N	N	N
apices	6 h	cold + low light	phyA	M	M	M	M	N	M	M	N	M	M	M	M	M	M	N	M	M	N	M	M	M	N	N	M	M	N	M	M
apices	6 h	control	phyB	S	S	S	S	S	R	R	Q	S	Q	RS	S	R	R	QR	R	Q	R	S	R	T	R	R	R	R	R	S	S
apices	6 h	low light	phyB	R	R	R	R	S	R	Q	R	R	Q	R	Q	Q	Q	Q	R	Q	R	R	R	S	Q	Q	Q	Q	Q	R	R
apices	6 h	cold	phyB	R	QR	Q	Q	Q	Q	R	T	R	Q	S	QR	S	R	Q	QR	Q	Q	Q	Q	R	R	R	Q	Q	Q	S	R
apices	6 h	cold + low light	phyB	Q	Q	Q	Q	R	Q	QR	S	Q	Q	Q	R	R	Q	R	Q	Q	Q	Q	R	Q	R	R	Q	Q	Q	Q	Q
apices	7 d	control	WT	B	BC	B	C	C	A	A	A	B	AB	A	A	A	A	B	A	A	B	A	A	A	A	A	A	A	A	A	A
apices	7 d	low light	WT	C	C	C	C	D	A	C	AB	B	B	C	A	C	B	A	B	B	D	B	B	B	D	C	C	A	C	C	D
apices	7 d	cold	WT	A	A	A	B	B	A	B	C	B	A	B	A	B	B	B	A	B	A	A	B	A	B	B	B	A	B	B	B
apices	7 d	cold + low light	WT	A	AB	A	A	A	A	AB	B	A	A	C	A	B	B	B	A	AB	C	A	B	A	C	B	B	A	BC	B	C
apices	7 d	control	cry1	F	G	G	G	G	E	EF	G	G	F	EF	F	EFG	F	EF	F	E	EF	F	E	F	E	E	F	F	FG	G	F
apices	7 d	low light	cry1	F	F	G	H	G	F	F	E	G	F	F	F	G	EF	E	F	F	G	F	F	F	F	F	G	F	G	G	G
apices	7 d	cold	cry1	E	EF	E	E	E	F	E	EF	E	E	E	E	E	EF	F	F	E	E	E	E	EF	E	E	E	EF	F	F	E
apices	7 d	cold + low light	cry1	E	E	F	F	F	EF	F	F	F	F	F	F	F	E	F	E	E	F	E	F	E	EF	E	G	E	E	E	F
apices	7 d	control	cry2	IJ	I	K	J	J	I	I	J	J	J	I	J	I	I	IJ	I	IJ	J	J	I	I	I	I	J	IJ	IJ	I	J
apices	7 d	low light	cry2	J	I	L	K	K	J	J	I	J	J	J	J	K	I	I	I	J	K	K	J	J	J	J	K	J	J	J	K
apices	7 d	cold	cry2	I	I	I	I	I	IJ	I	J	I	I	I	I	I	I	J	I	I	I	I	I	J	JK	J	I	J	I	IJ	I
apices	7 d	cold + low light	cry2	I	I	J	I	I	I	I	IJ	J	J	J	J	J	I	J	I	IJ	J	I	IJ	IJ	K	J	K	I	J	IJ	K
apices	7 d	control	phyA	N	MN	O	N	N	M	MN	M	N	M	N	N	M	N	M	M	MN	N	M	MN	M	M	M	M	M	M	M	MN
apices	7 d	low light	phyA	O	O	P	O	O	N	N	MN	MN	N	O	N	N	O	MN	P	O	O	N	N	M	N	N	O	M	N	M	O
apices	7 d	cold	phyA	MN	N	M	M	N	N	M	MN	M	M	O	M	M	NO	N	O	N	M	M	MN	M	N	M	N	N	N	M	M
apices	7 d	cold + low light	phyA	M	M	N	M	M	N	MN	N	M	M	M	N	M	M	N	N	M	MN	M	M	M	N	M	N	M	M	M	N
apices	7 d	control	phyB	Q	R	S	S	QR	Q	Q	QR	R	S	Q	Q	Q	Q	Q	Q	Q	Q	Q	Q	Q	Q	Q	Q	QR	Q	Q	Q
apices	7 d	low light	phyB	R	R	T	T	S	S	S	R	Q	RS	S	Q	R	R	Q	R	R	S	R	RS	QR	R	R	R	R	R	S	S
apices	7 d	cold	phyB	Q	R	R	R	R	S	R	R	R	R	R	Q	R	R	S	R	QR	Q	Q	S	R	R	R	Q	QR	R	QRS	Q
apices	7 d	cold + low light	phyB	Q	Q	Q	Q	Q	R	QR	Q	Q	Q	Q	Q	R	Q	R	Q	QR	R	Q	R	Q	R	Q	Q	Q	Q	R	R
leaves	30 min	control	WT	B	B	B	B	B	A	B	A	C	A	A	A	C	B	C	AB	A	AB	A	A	B	C	A	B	B	B	C	A
leaves	30 min	low light	WT	B	A	B	B	B	B	B	A	C	B	A	A	C	A	C	B	A	B	B	A	AB	B	A	C	A	B	B	A
leaves	30 min	cold	WT	A	A	A	A	A	B	A	A	B	A	A	A	B	A	A	A	A	A	A	A	AB	A	A	C	A	B	A	A
leaves	30 min	cold + low light	WT	A	A	A	A	A	C	A	A	A	A	A	A	A	AB	B	AB	A	AB	A	A	A	AB	A	A	A	A	AB	A
leaves	30 min	control	cry1	F	H	G	G	F	EF	G	F	G	E	F	EF	G	F	H	G	EF	F	F	F	H	F	F	F	F	F	F	F
leaves	30 min	low light	cry1	E	G	G	F	F	E	F	F	F	F	E	E	F	E	G	G	F	F	F	E	G	E	E	E	E	E	E	E
leaves	30 min	cold	cry1	F	E	E	E	E	F	E	E	E	E	E	EF	E	E	E	E	E	E	E	EF	E	F	F	EF	E	F	E	F
leaves	30 min	cold + low light	cry1	F	F	F	E	E	F	F	EF	E	E	F	F	E	EF	F	F	EF	F	E	EF	F	E	E	E	E	E	E	E
leaves	30 min	control	cry2	J	K	K	K	K	I	J	J	K	I	I	I	IJ	J	K	J	IJ	IJ	I	I	J	J	I	I	K	K	J	J
leaves	30 min	low light	cry2	I	K	K	L	L	J	J	J	K	I	I	I	J	I	K	K	J	J	J	I	J	I	I	J	IJ	J	I	J
leaves	30 min	cold	cry2	IJ	I	I	I	I	J	I	I	J	I	I	I	I	I	I	I	I	J	IJ	I	IJ	J	J	J	I	L	I	K
leaves	30 min	cold + low light	cry2	I	J	J	J	J	J	I	J	I	I	I	I	I	I	J	I	J	I	J	I	I	I	I	IJ	J	I	I	I
leaves	30 min	control	phyA	N	N	N	N	N	M	N	N	N	M	N	M	N	N	O	N	M	M	M	N	O	O	MN	MN	N	O	N	N
leaves	30 min	low light	phyA	M	N	N	N	N	MN	MN	N	N	N	M	M	M	M	NO	N	M	N	N	N	NO	N	N	M	M	N	M	N
leaves	30 min	cold	phyA	MN	M	M	M	M	N	M	MN	MN	M	N	M	MN	M	M	M	M	M	M	M	N	MN	N	N	M	O	M	N
leaves	30 min	cold + low light	phyA	MN	M	M	M	M	N	M	M	M	MN	N	M	M	M	N	M	M	M	M	N	M	M	M	M	M	M	M	M
leaves	30 min	control	phyB	R	R	R	R	S	R	R	R	R	R	R	QR	R	R	S	R	R	R	RS	Q	S	S	R	Q	S	RS	R	R
leaves	30 min	low light	phyB	Q	R	R	R	S	Q	Q	Q	Q	Q	Q	Q	Q	Q	R	R	Q	QR	S	R	R	Q	Q	Q	Q	Q	Q	Q
leaves	30 min	cold	phyB	Q	Q	Q	Q	Q	QR	R	Q	Q	QR	R	Q	Q	Q	Q	Q	Q	QR	Q	Q	RS	R	R	Q	R	S	QR	QR
leaves	30 min	cold + low light	phyB	R	Q	Q	Q	R	R	R	Q	Q	Q	R	R	Q	R	RS	Q	Q	Q	R	R	Q	RS	R	Q	R	R	Q	QR
leaves	6 h	control	WT	B	B	B	C	C	C	C	B	B	A	B	C	B	C	AB	A	C	C	C	C	C	B	B	B	C	B	B	C
leaves	6 h	low light	WT	A	A	A	B	B	B	A	A	A	A	A	AB	AB	A	A	A	A	BC	B	C	B	A	A	A	B	A	A	B
leaves	6 h	cold	WT	A	A	A	A	AB	A	B	B	A	A	A	A	A	AB	A	A	AB	A	A	A	A	B	B	A	A	A	B	A
leaves	6 h	cold + low light	WT	A	A	A	AB	A	A	C	B	A	A	AB	BC	A	BC	B	A	B	B	AB	B	B	C	C	A	B	B	B	B
leaves	6 h	control	cry1	G	H	G	F	G	H	F	E	H	E	E	G	EF	F	E	E	F	F	G	G	G	E	F	F	G	G	G	H
leaves	6 h	low light	cry1	E	G	F	F	H	G	E	E	G	E	E	F	E	E	E	F	E	F	G	H	F	E	E	E	F	F	FG	F
leaves	6 h	cold	cry1	EF	E	F	E	E	E	EF	E	E	E	E	E	E	EF	E	E	E	E	E	E	E	E	EF	E	E	E	E	E
leaves	6 h	cold + low light	cry1	F	F	E	E	F	F	F	F	F	F	E	F	F	F	F	E	E	F	F	F	E	F	G	E	EF	H	F	F
leaves	6 h	control	cry2	J	K	J	J	J	K	J	J	J	I	IJ	IJ	J	IJ	I	JK	J	J	K	K	K	J	I	K	J	K	J	L
leaves	6 h	low light	cry2	I	J	I	J	K	K	I	I	J	IJ	I	I	I	I	I	K	I	J	JK	K	J	I	I	J	I	J	IJ	K
leaves	6 h	cold	cry2	I	I	I	I	I	I	IJ	J	I	IJ	J	I	I	IJ	J	I	I	I	I	I	I	I	I	I	I	I	I	I
leaves	6 h	cold + low light	cry2	I	J	I	I	J	J	IJ	J	IJ	J	J	J	I	J	J	J	IJ	J	J	J	I	K	J	IJ	I	K	IJ	J
leaves	6 h	control	phyA	O	O	N	P	O	O	N	N	N	MN	N	M	N	O	M	N	O	N	N	O	P	M	M	O	O	O	N	P
leaves	6 h	low light	phyA	N	O	M	O	O	O	M	M	M	M	MN	M	M	N	N	O	N	O	N	P	O	M	M	N	N	N	M	O
leaves	6 h	cold	phyA	MN	M	M	M	M	M	N	N	M	M	M	M	MN	M	N	M	M	M	M	M	M	M	N	M	M	M	M	M
leaves	6 h	cold + low light	phyA	M	N	M	N	N	N	N	O	M	N	N	N	MN	ON	O	N	MNO	ON	M	N	N	N	O	N	MN	O	M	N
leaves	6 h	control	phyB	S	S	R	R	R	S	R	Q	R	Q	R	R	R	Q	Q	Q	Q	R	RS	R	S	Q	Q	R	R	R	Q	R
leaves	6 h	low light	phyB	Q	R	Q	R	S	T	Q	Q	Q	Q	Q	R	Q	QR	Q	S	Q	T	S	S	R	Q	Q	Q	R	Q	Q	Q
leaves	6 h	cold	phyB	R	Q	QR	QR	Q	Q	R	R	Q	Q	QR	Q	R	Q	R	Q	Q	Q	Q	Q	Q	Q	Q	Q	Q	Q	Q	Q
leaves	6 h	cold + low light	phyB	R	QR	Q	Q	QRS	R	S	S	Q	Q	R	S	S	R	S	R	R	S	R	S	QR	R	R	QR	R	R	Q	Q
leaves	7 d	control	WT	B	ABC	BC	C	A	AB	AB	A	A	AB	A	AB	A	B	A	AB	A	C	C	A	A	A	A	AB	A	A	AB	A
leaves	7 d	low light	WT	B	C	C	C	B	B	B	AB	AB	B	B	B	A	B	A	B	A	C	C	AB	A	C	B	C	AB	B	B	B
leaves	7 d	cold	WT	A	B	B	B	A	A	AB	B	B	A	AB	A	A	A	B	A	A	A	A	B	A	B	AB	BC	B	A	B	A
leaves	7 d	cold + low light	WT	AB	A	A	A	A	AB	A	AB	A	A	A	AB	A	A	AB	A	A	B	B	B	A	C	A	A	AB	A	A	B
leaves	7 d	control	cry1	G	F	H	G	G	E	F	F	G	F	E	G	EF	H	EF	F	E	G	F	E	F	E	E	F	F	F	E	F
leaves	7 d	low light	cry1	F	F	G	G	G	F	F	E	F	G	F	G	E	G	E	G	F	G	G	G	F	F	F	EF	F	F	F	G
leaves	7 d	cold	cry1	EF	F	F	F	F	E	E	F	F	E	F	E	E	F	F	F	EF	E	E	E	F	F	EF	E	EF	E	EF	E
leaves	7 d	cold + low light	cry1	E	E	E	E	E	E	EF	E	E	F	E	F	F	E	G	E	E	F	F	F	E	G	F	F	E	F	E	F
leaves	7 d	control	cry2	J	K	J	J	J	IJ	J	J	J	J	I	J	J	K	I	J	IJ	K	K	IJ	IJ	I	I	J	J	I	I	IJ
leaves	7 d	low light	cry2	K	K	J	K	J	J	J	I	J	J	J	J	J	JK	J	J	J	K	K	J	J	J	J	JK	IJ	I	I	J
leaves	7 d	cold	cry2	I	J	I	I	I	I	IJ	J	IJ	I	J	I	I	J	J	J	IJ	I	I	I	IJ	J	J	I	J	I	I	I
leaves	7 d	cold + low light	cry2	I	I	I	I	I	I	I	I	I	I	J	J	IJ	I	J	I	I	J	J	J	I	K	J	K	I	I	I	IJ
leaves	7 d	control	phyA	N	O	N	O	MN	M	N	N	N	N	M	O	N	N	M	N	MNO	N	N	M	M	MN	MN	MN	N	MN	N	M
leaves	7 d	low light	phyA	N	O	N	O	O	M	N	MN	N	N	N	N	MN	N	M	O	O	N	N	MNO	M	M	N	M	N	M	MN	M
leaves	7 d	cold	phyA	MN	N	M	N	N	M	N	O	N	M	N	M	M	MN	N	N	N	M	M	N	N	N	N	N	N	N	N	M
leaves	7 d	cold + low light	phyA	M	M	M	M	M	M	M	M	M	M	N	MN	MN	M	O	M	M	M	M	O	M	N	M	MN	M	MN	M	M
leaves	7 d	control	phyB	S	R	S	S	Q	Q	R	R	S	R	Q	R	Q	R	Q	R	QR	S	R	Q	Q	Q	QR	R	R	Q	QR	QR
leaves	7 d	low light	phyB	R	R	S	S	R	QRS	R	QR	RS	R	QR	R	Q	R	Q	R	R	S	R	R	R	R	R	QR	QR	QR	R	R
leaves	7 d	cold	phyB	RS	S	R	R	Q	S	R	R	R	Q	S	Q	Q	R	R	R	QR	Q	Q	R	S	R	R	QR	S	R	R	QR
leaves	7 d	cold + low light	phyB	Q	Q	Q	Q	Q	R	Q	Q	Q	QR	R	Q	Q	Q	QR	Q	Q	R	Q	R	QR	R	Q	Q	Q	Q	Q	Q
roots	30 min	control	WT	B	B	B	B	B	BC	A	A	BC	A	B	B	BC	B	A	AB	B	B	B	AB	AB	B	B	B	B	BC	C	A
roots	30 min	low light	WT	AB	A	B	C	C	A	B	AB	C	A	C	B	C	A	A	B	B	AB	B	A	B	A	A	A	A	A	A	AB
roots	30 min	cold	WT	B	A	A	A	A	C	A	AB	B	A	BC	B	A	AB	A	AB	A	A	A	B	B	B	C	B	AB	C	BC	B
roots	30 min	cold + low light	WT	A	A	A	A	A	B	AB	B	A	A	A	A	B	A	A	A	A	B	B	B	A	A	AB	AB	A	B	AB	AB
roots	30 min	control	cry1	E	F	H	H	G	G	F	F	G	E	F	G	F	G	F	F	F	F	EF	EF	G	F	F	G	G	F	H	E
roots	30 min	low light	cry1	E	E	G	G	G	E	E	F	F	EF	E	E	E	E	E	E	E	E	E	E	F	E	E	E	E	E	E	E
roots	30 min	cold	cry1	F	E	E	E	E	F	F	F	FG	F	FG	FG	F	F	E	E	E	EF	F	F	E	F	F	F	G	G	F	F
roots	30 min	cold + low light	cry1	E	E	F	F	F	FG	F	E	E	F	G	F	F	FG	E	EF	E	F	F	F	F	F	F	EF	F	G	G	E
roots	30 min	control	cry2	K	J	L	K	K	J	J	I	JK	I	I	J	IJ	J	J	J	J	J	K	IJ	K	J	K	K	J	J	K	I
roots	30 min	low light	cry2	J	J	K	K	K	I	I	I	J	I	I	I	J	I	I	J	J	I	J	I	K	I	J	I	I	I	J	J
roots	30 min	cold	cry2	JK	I	I	I	I	IJ	I	I	K	I	I	K	IJ	I	I	I	I	I	I	I	I	J	K	IJ	IJ	K	K	J
roots	30 min	cold + low light	cry2	I	J	J	J	J	J	I	I	I	J	I	I	I	I	I	I	IJ	I	I	J	J	I	I	J	J	I	I	I
roots	30 min	control	phyA	N	MN	N	N	N	M	M	M	M	M	M	MN	M	N	N	M	MN	MN	MN	M	M	M	MN	N	M	N	M	M
roots	30 min	low light	phyA	N	N	N	N	O	M	N	N	M	N	M	M	M	N	M	M	N	N	N	N	M	M	MN	MN	M	MN	MN	N
roots	30 min	cold	phyA	O	M	M	M	M	M	MN	M	M	MN	M	N	M	MN	M	M	M	M	M	M	M	N	N	MN	M	N	MN	N
roots	30 min	cold + low light	phyA	M	N	M	M	M	M	MN	M	M	N	M	MN	M	M	N	M	MN	N	MN	M	M	M	M	M	M	M	N	M
roots	30 min	control	phyB	S	RS	R	R	R	R	Q	R	R	Q	R	R	Q	RS	Q	Q	Q	QR	R	R	Q	RS	R	R	RS	R	QR	Q
roots	30 min	low light	phyB	Q	Q	R	R	S	Q	Q	QRS	Q	QR	Q	Q	Q	Q	Q	Q	Q	R	Q	Q	Q	Q	Q	Q	Q	Q	Q	QRS
roots	30 min	cold	phyB	S	S	Q	Q	Q	S	Q	S	R	QR	S	S	Q	S	Q	Q	Q	Q	R	RS	Q	S	R	R	S	T	R	S
roots	30 min	cold + low light	phyB	R	R	Q	Q	Q	R	Q	Q	QR	R	T	RS	Q	R	Q	Q	Q	R	R	S	Q	R	R	R	R	S	R	R
roots	6 h	control	WT	C	AB	D	D	C	B	AB	C	C	AB	A	B	B	C	A	AB	B	B	A	C	B	B	B	B	B	B	B	AB
roots	6 h	low light	WT	B	B	C	C	C	A	A	A	B	A	A	A	A	A	A	B	B	B	A	B	B	A	A	A	A	A	A	A
roots	6 h	cold	WT	B	A	A	A	A	A	A	B	A	B	B	B	A	BC	A	A	A	A	A	A	A	B	BC	B	A	D	B	B
roots	6 h	cold + low light	WT	A	A	B	B	B	A	B	D	A	B	C	AB	A	B	B	B	B	AB	A	B	B	C	C	B	A	C	AB	B
roots	6 h	control	cry1	H	FG	H	G	F	G	G	FG	F	F	F	F	F	FG	F	F	FG	EF	EF	G	E	F	F	F	G	F	F	EF
roots	6 h	low light	cry1	G	G	G	F	F	E	E	E	E	E	E	E	E	E	E	E	F	E	EF	G	E	E	E	E	F	E	E	E
roots	6 h	cold	cry1	F	E	E	E	E	EF	F	F	E	G	F	F	EF	F	F	F	E	E	E	E	E	F	F	F	E	G	EF	F
roots	6 h	cold + low light	cry1	E	F	F	E	E	F	G	G	E	G	F	F	EF	G	G	F	G	F	F	F	E	G	F	F	F	F	F	EF
roots	6 h	control	cry2	L	J	K	K	K	J	IJ	J	J	I	J	J	K	I	I	I	JK	I	IJ	K	I	J	J	J	J	J	I	I
roots	6 h	low light	cry2	K	J	J	J	K	I	I	I	I	I	I	I	J	I	IJ	I	J	I	I	K	J	I	I	I	I	I	I	I
roots	6 h	cold	cry2	J	I	I	I	I	I	I	J	I	J	J	J	IJ	I	I	I	I	I	IJ	I	I	K	J	IJ	I	L	I	J
roots	6 h	cold + low light	cry2	I	I	I	I	J	I	J	J	IJ	J	J	J	I	I	J	I	K	I	J	J	I	L	J	J	IJ	K	I	J
roots	6 h	control	phyA	O	N	O	O	O	P	N	N	N	MN	N	N	N	O	M	MN	N	M	N	N	O	N	O	N	N	ON	N	N
roots	6 h	low light	phyA	N	N	N	N	N	N	M	M	M	M	M	M	M	M	M	N	MN	M	MN	O	N	M	M	M	M	M	M	M
roots	6 h	cold	phyA	N	M	M	M	M	O	N	N	MN	MN	N	N	M	O	M	M	MN	M	MN	MN	MN	O	P	N	M	O	MN	MN
roots	6 h	cold + low light	phyA	M	M	M	M	M	M	N	N	M	N	N	MN	M	N	N	M	M	M	M	M	M	P	N	N	M	N	M	MN
roots	6 h	control	phyB	S	S	R	R	R	S	R	R	S	Q	QR	R	QR	R	Q	Q	Q	S	S	Q	RS	R	R	R	S	R	R	QRS
roots	6 h	low light	phyB	R	S	R	R	R	Q	Q	Q	R	QR	Q	Q	R	Q	R	S	R	R	RS	R	R	Q	Q	Q	R	Q	Q	R
roots	6 h	cold	phyB	R	R	Q	Q	Q	R	R	QR	QR	R	R	R	QR	R	R	R	QR	QR	R	Q	S	R	R	R	RS	S	R	S
roots	6 h	cold + low light	phyB	Q	Q	Q	Q	Q	RS	Q	R	Q	Q	S	QR	Q	QR	S	QR	Q	Q	Q	Q	Q	QR	Q	QR	Q	R	QR	Q
roots	7 d	control	WT	C	B	C	B	C	C	B	B	B	A	A	B	C	B	A	B	B	B	C	B	A	A	A	A	A	B	B	AB
roots	7 d	low light	WT	C	B	AB	A	BC	A	B	A	A	B	A	B	B	A	AB	B	AB	A	BC	AB	A	A	A	B	A	AB	A	B
roots	7 d	cold	WT	A	A	A	A	A	B	A	A	A	B	A	AB	A	A	B	A	A	AB	AB	A	A	B	A	B	A	A	A	A
roots	7 d	cold + low light	WT	B	A	B	A	AB	B	AB	AB	A	B	A	A	A	A	B	A	AB	A	A	A	A	B	A	B	A	B	A	A
roots	7 d	control	cry1	F	F	F	G	E	F	F	F	F	E	F	G	F	G	E	F	F	F	F	F	F	E	F	E	G	F	F	F
roots	7 d	low light	cry1	G	F	E	F	F	EF	F	E	E	F	EF	FG	F	F	E	F	EF	EF	F	F	F	E	F	G	FG	F	F	G
roots	7 d	cold	cry1	E	EF	E	F	E	F	E	E	E	E	G	F	E	FG	E	EF	E	E	E	E	F	E	F	EFG	F	EF	E	E
roots	7 d	cold + low light	cry1	E	E	E	E	E	E	E	F	E	E	E	E	EF	E	F	E	E	E	E	E	E	E	E	F	E	E	E	F
roots	7 d	control	cry2	J	J	K	J	I	J	J	J	J	IJ	I	J	J	J	I	J	J	J	J	J	I	I	I	I	J	J	J	J
roots	7 d	low light	cry2	J	J	I	I	I	I	J	I	I	K	J	J	J	J	IJ	J	IJ	IJ	J	J	I	I	I	J	J	I	I	K
roots	7 d	cold	cry2	I	I	J	I	I	IJ	I	IJ	I	J	J	J	I	IJ	I	I	I	I	I	I	I	I	I	K	J	I	I	I
roots	7 d	cold + low light	cry2	I	IJ	J	I	I	IJ	I	J	I	I	IJ	I	J	I	J	I	IJ	IJ	I	I	I	J	I	JK	I	IJ	I	JK
roots	7 d	control	phyA	N	MN	N	O	NO	N	N	O	N	M	MN	N	O	M	M	N	N	O	N	N	N	M	M	M	M	MN	N	M
roots	7 d	low light	phyA	N	N	MN	N	O	M	N	N	M	O	M	N	NO	M	M	N	N	NO	N	O	M	N	N	N	N	M	M	P
roots	7 d	cold	phyA	M	M	M	M	M	N	M	M	M	MN	N	N	M	M	M	M	M	M	MN	M	MN	N	N	NO	MN	MN	MN	N
roots	7 d	cold + low light	phyA	M	M	N	N	N	N	M	O	M	N	N	M	N	M	N	M	MN	N	N	N	M	O	N	O	M	N	M	O
roots	7 d	control	phyB	R	S	S	R	QR	Q	R	R	S	Q	Q	R	R	R	Q	R	S	Q	R	S	Q	Q	Q	Q	QR	R	R	QR
roots	7 d	low light	phyB	S	S	R	Q	Q	Q	R	Q	R	R	R	R	Q	R	QR	R	S	Q	R	R	QR	QR	QR	QR	R	QR	Q	S
roots	7 d	cold	phyB	Q	R	Q	Q	QR	R	Q	Q	Q	Q	R	R	Q	R	R	R	R	Q	QR	Q	R	R	R	QR	R	Q	Q	Q
roots	7 d	cold + low light	phyB	Q	Q	RS	Q	R	Q	R	R	R	Q	QR	Q	Q	Q	S	Q	Q	Q	Q	Q	QR	S	QR	R	Q	R	Q	R

## Sheet: Stat_time
tissue	time	variant	genotype	RD29A	COR47	CBF1	CBF2	CBF3	HY5	PIF3	PIF4	NCED3	PYL6	IPT3	IPT5	CKX5	ARR4	ARR5	ARR7	ARR10	CRF3	CRF4	GA2OX1	GA2OX6	RGA1	RGA2	RGL3	D14	MAX2	SMAX1	SMXL6
apices	30 min	control	WT	C	B	A	A	A	A	B	B	A	A	B	A	A	B	A	B	A	B	A	C	B	B	B	C	B	B	B	B
apices	6 h	control	WT	B	AB	A	B	A	B	B	A	B	A	B	B	B	B	A	AB	A	B	B	B	A	B	B	B	B	B	C	B
apices	7 d	control	WT	A	A	B	B	A	A	A	A	B	A	A	B	A	A	B	A	A	A	A	A	A	A	A	A	A	A	A	A
leaves	30 min	control	WT	C	A	A	A	B	A	AB	A	B	A	B	A	AB	BB	B	A	A	AB	A	B	A	B	AB	B	B	B	C	B
leaves	6 h	control	WT	B	A	A	B	A	C	B	A	B	A	B	A	B	B	AB	B	B	A	A	AB	B	B	B	C	B	B	B	B
leaves	7 d	control	WT	A	A	A	B	A	B	A	A	A	A	A	A	A	A	A	AB	A	B	A	A	A	A	A	A	A	A	A	A
roots	30 min	control	WT	A	B	A	A	A	A	A	A	AB	AB	A	A	A	A	AB	A	AB	A	A	A	A	A	A	B	A	A	A	A
roots	6 h	control	WT	A	A	A	C	B	A	B	B	A	B	B	A	A	B	B	A	A	AB	AB	A	B	B	A	B	B	A	A	A
roots	7 d	control	WT	B	B	A	B	A	A	B	B	B	A	AB	A	A	AB	A	A	B	B	B	A	B	A	A	A	AB	A	B	A
