# Supplementary material for: Light Quality and Intensity Modulate Cold Acclimation in Arabidopsis
Source: Int J Mol Sci. 2021 Mar 8;22(5):2736. doi: 10.3390/ijms22052736 (PMC7962961; doi:10.3390/ijms22052736)
Supplement: Supplementary file 1 [file ijms-22-02736-s001.zip › Table S4-Primers.xlsx]

## Sheet: List1
Gene	AGI	Name	Forward primer	Reverse primer	Fragment length (bp)	Primers in reaction (nM)
UBQ10	At4g05320	ubiquitin 10	GAAGTTCAATGTTTCGTTTCATGT	GGATTATACAAGGCCCCAAAA	64	300
RD29A	At5g52310	responsive to dessication 29A	GGAGTACCGGAGATTGCTGAG	ACCGAGAACAGAGTCAAAGTCC	147	500
COR47	At1g20440	cold-regulated 47	TCCACGATCCGTAACCTCTGTT	CCGAGCACGAGACACCAAC	71	400
CBF1	At4g25490	C-repeat 1	GCCACGAGTTGTCCGAAGAAA	GGTTTTCTTGTTTGGCTCTCTCAC	132	600
CBF2	At4g25470	C-repeat 2	GGTCTTGACATGGAGGAGACC	CAACATCGCCTCTTCATCCATA	90	600
CBF3	At4g25480	C-repeat 3	GAAGCTGCGTTGGCGTTTCAG	TCTCAAACATCGCCTCATCGTG	145	600
HY5	At5g11260	elongated hypocotyl 5	CCATCAAGCAGCGAGAGGTCATCAA	CGCCGATCCAGATTCTCTACCGGAA	147	500
PIF3	At1g09530	phytochrome interacting factor 3	CGGTTTACTCAGACGCAGGA	GAAACACATTTGGCGGGCTT	157	500
PIF4	At2g43010	phytochrome interacting factor 4	ATCGGTAACAAGTCGAACCAAC	AACTTCAGCTGCTCGACTCC	129	400
NCED3	At3g14440	9-cis-epoxycarotenoid dioxygenase 3	GACGAGAATCTCAAGAGTG	CCGAGCATGTTTCTGTTGAC	137	300
PYL6	At2g40330	PYR-like 6	GCATGAGTCGGAGGAGGAC	GACGTATGACTCAACGACACG	61	400
IPT3	At3g63110	isopentenyl transferase 3	AAAGCGAAGGTCCAAGATGG	TGGCAATGTCCAGCAGAAAC	98	600
IPT5	At5g19040	isopentenyl transferase 5	CAAGCAGTGGAAGTGGAACA	TGGTGGTCATCGCTGTAACT	150	600
CKX5	At1g75450	cytokinin oxidase/dehydrogenase 5	ACACAAGGCCGAATTGAAGC	TTTGGCACGAAGAGGTTGAG	78	600
ARR4	At1g10470	response regulator 4 type A	GGTGGTATCGGAGGAATTGA	ACGCCATCCACTATCTACCG	150	500
ARR5	At3g48100	response regulator 5 type A	GTTTTGCGTCCCGAGATGTTA	AACCGAACTATTATTCTCTCCATC	213	500
ARR7	At1g19050	response regulator 7 type A	TTGTGGATCGTAAAGTCATCG	CTATCAAATTCACCTTCAAATCC	150	600
ARR10	At4g31920	response regulator 10 type B	GCTTCTGATGCTGGTTCCTT	CAATCACCTTCCGAGAAATCA	86	400
CRF3	At5g53290	cytokinin response factor 3	ATTTGGCTCGGGACTTTTG	AGCGGCGTTATCATAAACCA	60	500
CRF4	At4g27950	cytokinin response factor 4	ATCTGGCTCGGTACTTTTGC	GATTGCTGCGTTGTCGTAGA	63	500
GA2OX1	At1g78440	gibberellin 2 oxidase 1	CGGTTCGGGTCCACTATTTC	GCTAAGTGTGTTCCTCGGTTTG	154	500
GA2OX6	At1g02400	gibberellin 2 oxidase 6	TTCTTCTCCACGCAAATCCG	CCAAATCTCTAACCGTGCGTATG	117	500
RGA1	At2g01570	repressor of GA 1	TTTGTGGTTTTCCGGCTTCG	ACTCCACCAATCTGCGTACC	178	500
RGA2	At1g14920	repressor of GA 2	TAACGGCATGGATGAGCTTC	AGCAACATCAGCCATTTCGG	70	400
RGL3	At5g17490	RGA-like 3	AAATGGTTGTGGTGGTGGTG	TGAACGGTGTCATTGAAGGC	171	600
D14	At3g03990	DWARF 14	ATTTGCTCCGCTTGCTGTTG	AACTAACCCAAGCACACCTCTC	145	600
MAX2	At2g42620	more axillary branches 2	CAGAACCTTCTCGCTCTCCG	GAGGAGCTTGATGTGGCGAA	132	600
SMAX1	At5g57710	supressor of MAX2 1	TCAGGACCGGATAGAGTGGG	CGCAATCTTATCCAACGCGG	156	400
SMXL6	At1g07200	SMAX1-like 6	GACGCTCTCTAGATGCCACC	GGTCTCAATAGCCCGTAGCC	136	600
